# Supplementary material for: Problems in the Handling of Police Investigations Involving Murder: Recounting Homicide Co-Victims’ Secondary Victimization Experiences
Source: Royal Society of Chemistry journal article supplement (doi:10.1039/d2dt03212k), 2010-11-16
Supplement: d2dt03212k1.pdf [file d2dt03212k1.pdf]

## Electronic Supplementary Information for

# Theoretical Investigation on the Elusive Structure-Activity Relationship of the Bioinspired High-Valent Nickel-Halogen Complexes in the Oxidative Fluorination Reactions

*Anran Zhou<sup>a,c</sup>, Xiao-Xi Li<sup>b</sup>, Dongru Sun<sup>a,c,\*</sup>, Xuanyu Cao<sup>c</sup>, Zhimin Wu<sup>a,c</sup>, Huanhuan Chen<sup>a,c</sup>, Yufen Zhao<sup>a,c</sup>, Wonwoo Nam<sup>d,\*</sup> and Yong Wang<sup>a,c,\*</sup>*

<sup>a</sup> Institute of Drug Discovery Technology, Ningbo University, Ningbo 315211, China.

<sup>b</sup> Institute of Molecular Science and Engineering, Institute of Frontier and Interdisciplinary Sciences, Shandong University, Qingdao 266237, China.

<sup>c</sup> *Qian Xuesen Collaborative Research Center of Astrochemistry and Space Life Sciences, Ningbo University, Ningbo 315211, China*

<sup>d</sup> Department of Chemistry and Nano Science, Ewha Womans University, Seoul 03760, Korea.

Email: yong@nbu.edu.cn, wwnam@ewha.ac.kr, sundongru@nbu.edu.cn

# Table of Contents

|                                                                                                |     |
|------------------------------------------------------------------------------------------------|-----|
| Part I. The Calculated data on the oxidants $\mathbf{1}_F$ and $\mathbf{1}_{Cl}$ .....         | S3  |
| Part II. C-H bond activation of CHD by the oxidants $\mathbf{1}_F$ and $\mathbf{1}_{Cl}$ ..... | S7  |
| Part III. Desaturation vs. Halogenation of the CHD-H radical.....                              | S14 |
| Part III-1: desaturation vs. halogenation by the oxidant $\mathbf{1}_F$ .....                  | S14 |
| Part III-2: desaturation vs. halogenation by AgF.....                                          | S17 |
| Part IV: The nature of the AgF-binding Ni(III)-F oxidant $\mathbf{1}_{F-Ag-F}$ .....           | S21 |
| Part V: C-H bond activation of CHD by the proximal fluorine of $\mathbf{1}_{F-Ag-F}$ .....     | S23 |
| Part VI: C-H bond activation of CHD by the distal fluorine of $\mathbf{1}_{F-Ag-F}$ .....      | S31 |
| Part VII: Difluorination of $PPh_3$ by two separated $\mathbf{1}_F$ oxidants .....             | S37 |
| Part VIII: Difluorination of $PPh_3$ by the cooperation of two $\mathbf{1}_F$ oxidants.....    | S44 |
| PART IX. Cartesian coordinates .....                                                           | S51 |

## Part I. The Calculated data on the oxidants **1<sub>F</sub>** and **1<sub>Cl</sub>**

**Table S1.** Benchmark of the performance of the employed B3LYP functional with six other functionals (PBE0, B3LYP\*, TPSSh, B3LYP-D3(BJ), M06, and B97D3). Calculations were done at the UB3LYP/B2 level.

|                                   | b3lyp        | $\Delta E$ | pbe1pbe      | $\Delta E$ | b3lyp-star   | $\Delta E$ | tpssh        | $\Delta E$ |
|-----------------------------------|--------------|------------|--------------|------------|--------------|------------|--------------|------------|
| <sup>2</sup> <b>1<sub>F</sub></b> | -2812.209399 | 0.0        | -2810.447218 | 0.0        | -2810.345562 | 0.0        | -2812.278146 | 0.0        |
| <sup>4</sup> <b>1<sub>F</sub></b> | -2812.189000 | 12.8       | -2810.432076 | 9.5        | -2810.315022 | 19.2       | -2812.243017 | 22.0       |
|                                   | b3lyp-d3bj   | $\Delta E$ | m06          | $\Delta E$ | b97d3        | $\Delta E$ |              |            |
| <sup>2</sup> <b>1<sub>F</sub></b> | -2812.339660 | 0.0        | -2811.226569 | 0.0        | -2812.052309 | 0.0        |              |            |
| <sup>4</sup> <b>1<sub>F</sub></b> | -2812.318557 | 13.2       | -2811.202656 | 15.0       | -2812.007612 | 28.0       |              |            |

a. Absolute energies are in au units and the relative ones are in kcal mol<sup>-1</sup> units.

**Table S2.** Various SCF and free energies of the oxidant **1<sub>F</sub>** on the different spin states. Calculations were done at the UB3LYP/B2 level in solvent.

|                                   | OPT/B2                    | $\Delta E$ | OPT +ZPE     | $\Delta E$ | G            | $\Delta G$ |
|-----------------------------------|---------------------------|------------|--------------|------------|--------------|------------|
| <sup>2</sup> <b>1<sub>F</sub></b> | -2812.209399 <sup>a</sup> | 0.0        | -2811.815548 | 0.0        | -2811.857437 | 0.0        |
| <sup>4</sup> <b>1<sub>F</sub></b> | -2812.189000              | 12.8       | -2811.796861 | 11.7       | -2811.839565 | 11.2       |
| <sup>6</sup> <b>1<sub>F</sub></b> | -2812.099867              | 68.7       | -2811.711516 | 65.3       | -2811.753505 | 65.2       |

a. Absolute energies are in au units and the relative ones are in kcal mol<sup>-1</sup> units.

**Table S3.** Various SCF and free energies of the oxidant **1<sub>Cl</sub>** on the different spin states. Calculations were done at the UB3LYP/B2 level in solvent.

|                                    | OPT/B2                    | $\Delta E$ | OPT +ZPE     | $\Delta E$ | G            | $\Delta G$ |
|------------------------------------|---------------------------|------------|--------------|------------|--------------|------------|
| <sup>2</sup> <b>1<sub>Cl</sub></b> | -3172.570627 <sup>a</sup> | 0.0        | -3172.177651 | 0.0        | -3172.219806 | 0.0        |
| <sup>4</sup> <b>1<sub>Cl</sub></b> | -3172.550249              | 12.8       | -3172.159021 | 11.7       | -3172.202570 | 10.8       |
| <sup>6</sup> <b>1<sub>Cl</sub></b> | -3172.455174              | 72.4       | -3172.068354 | 68.6       | -3172.111891 | 67.7       |

a. Absolute energies are in au units and the relative ones are in kcal mol<sup>-1</sup> units.

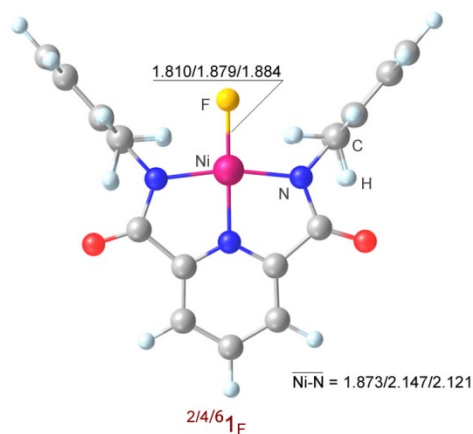

**Fig. S1** The optimized structures of the oxidant  $1_F$  on the doublet/quartet/sextet spin states. Lengths are in Å units. Calculations were done at the UB3LYP/B2 level in solvent.

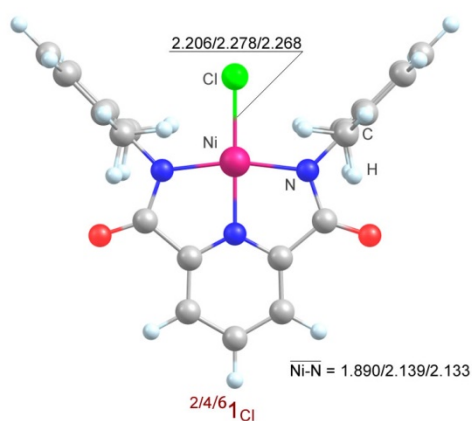

**Fig. S2** The optimized structures of the oxidant  $1_{Cl}$  on the doublet/quartet/sextet spin states. Lengths are in Å units. Calculations were done at the UB3LYP/B2 level in solvent.

**Table S4.** Mulliken charges and spin densities of the oxidant **1<sub>F</sub>** on the different spin states. Calculations were done at the UB3LYP/B2 level.

|                                   | Spin density |      |       | Charge |       |       |
|-----------------------------------|--------------|------|-------|--------|-------|-------|
|                                   | Ni           | L    | F     | Ni     | L     | F     |
| <sup>2</sup> <b>1<sub>F</sub></b> | 0.76         | 0.25 | -0.01 | 1.07   | -0.60 | -0.47 |
| <sup>4</sup> <b>1<sub>F</sub></b> | 1.80         | 1.15 | 0.05  | 1.13   | -0.49 | -0.63 |
| <sup>6</sup> <b>1<sub>F</sub></b> | 1.83         | 3.13 | 0.04  | 1.06   | -0.43 | -0.63 |

**Table S5.** Mulliken charges and spin densities of the oxidant **1<sub>Cl</sub>** on the different spin states. Calculations were done at the UB3LYP/B2 level.

|                                    | Spin density |      |       | Charge |       |       |
|------------------------------------|--------------|------|-------|--------|-------|-------|
|                                    | Ni           | L    | Cl    | Ni     | L     | Cl    |
| <sup>2</sup> <b>1<sub>Cl</sub></b> | 0.79         | 0.23 | -0.02 | 0.72   | -0.35 | -0.36 |
| <sup>4</sup> <b>1<sub>Cl</sub></b> | 1.67         | 1.27 | 0.06  | 0.97   | -0.38 | -0.59 |
| <sup>6</sup> <b>1<sub>Cl</sub></b> | 1.72         | 3.19 | 0.08  | 0.89   | -0.31 | -0.57 |

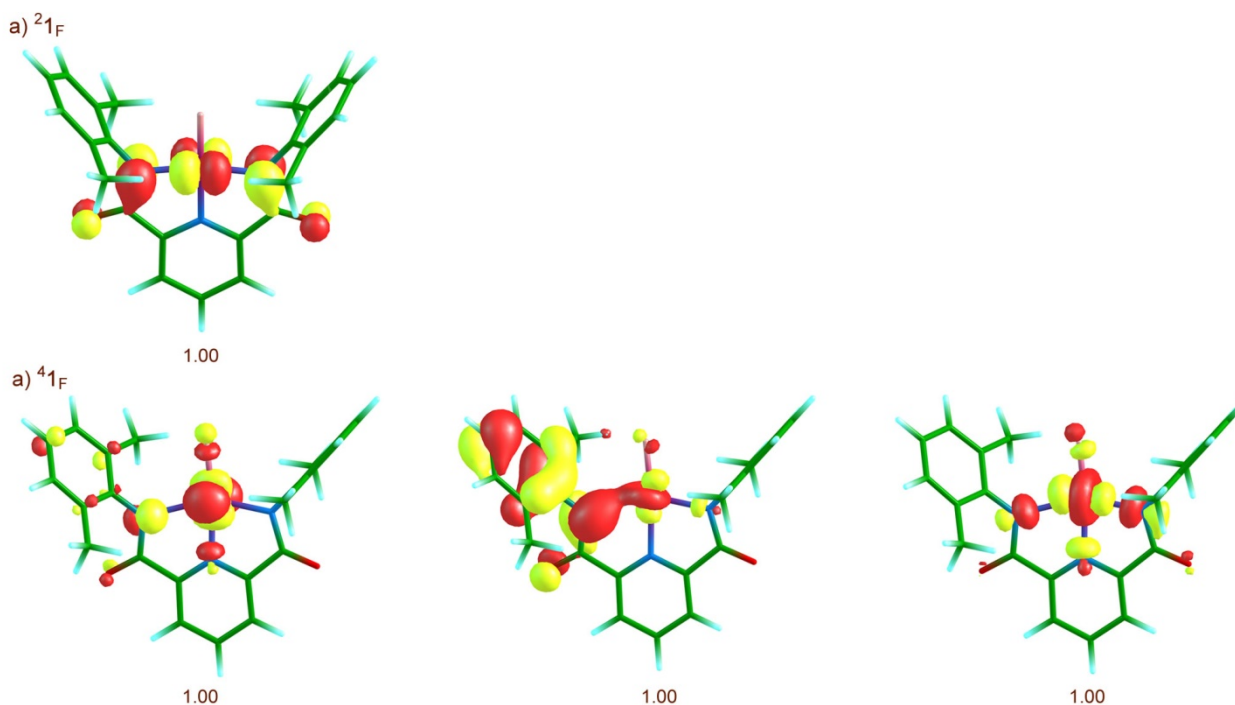

**Fig. S3** Singly-occupied natural orbitals (SNOs) of the oxidant  $1_F$  on the doublet and quartet spin states. Calculations were done at the UB3LYP/B2 level. Positive values represent alpha-electron occupations and negative ones represent beta-electron occupations.

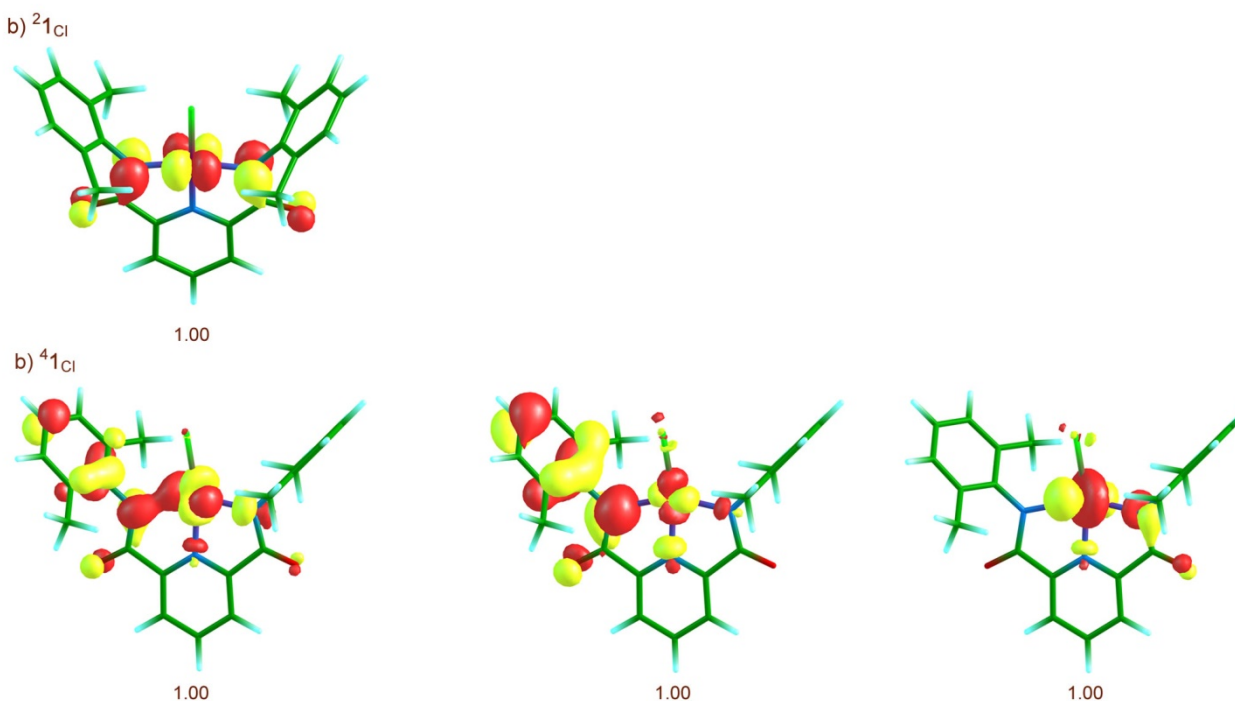

**Fig. S4** Singly-occupied natural orbitals (SNOs) of the oxidant  $1_{Cl}$  on the doublet and quartet spin states. Calculations were done at the UB3LYP/B2 level. Positive values represent alpha-electron occupations and negative ones represent beta-electron occupations.

## Part II. C-H bond activation of CHD by the oxidants **1<sub>F</sub>** and **1<sub>Cl</sub>**

**Table S6.** Various SCF and free energies of the reaction intermediates in C-H bond activation of CHD by the oxidant **1<sub>F</sub>** on the doublet and quartet spin states. Calculations were done at the UB3LYP/B2 level in solvent.

|                                    | OPT/B2                    | $\Delta E$ | OPT +ZPE     | $\Delta E$ | G            | $\Delta G$ |
|------------------------------------|---------------------------|------------|--------------|------------|--------------|------------|
| <sup>2</sup> <b>RC<sub>F</sub></b> | -3045.647076 <sup>a</sup> | 0.0        | -3045.131220 | 0.0        | -3045.185054 | 0.0        |
| <sup>4</sup> <b>RC<sub>F</sub></b> | -3045.622942              | 15.1       | -3045.109208 | 13.8       | -3045.164155 | 13.1       |
| <sup>2</sup> <b>TS<sub>F</sub></b> | -3045.617893              | 18.3       | -3045.109937 | 13.4       | -3045.160271 | 15.6       |
| <sup>4</sup> <b>TS<sub>F</sub></b> | -3045.611871              | 22.1       | -3045.102119 | 18.3       | -3045.152237 | 20.6       |
| <sup>2</sup> <b>IM<sub>F</sub></b> | -3045.632639              | 9.1        | -3045.120966 | 6.4        | -3045.172701 | 7.8        |
| <sup>4</sup> <b>IM<sub>F</sub></b> | -3045.632237              | 9.3        | -3045.120718 | 6.6        | -3045.173168 | 7.5        |

a. Absolute energies are in au units and the relative ones are in kcal mol<sup>-1</sup> units.

**Table S7.** Various SCF and free energies of the reaction intermediates in C-H bond activation of CHD by the oxidant **1<sub>Cl</sub>** on the doublet and quartet spin states. Calculations were done at the UB3LYP/B2 level in solvent.

|                                     | OPT/B2                    | $\Delta E$ | OPT +ZPE     | $\Delta E$ | G            | $\Delta G$ |
|-------------------------------------|---------------------------|------------|--------------|------------|--------------|------------|
| <sup>2</sup> <b>RC<sub>Cl</sub></b> | -3406.008250 <sup>a</sup> | 0.0        | -3405.493367 | 0.0        | -3405.548591 | 0.0        |
| <sup>4</sup> <b>RC<sub>Cl</sub></b> | -3405.990503              | 11.1       | -3405.477227 | 10.1       | -3405.533948 | 9.2        |
| <sup>2</sup> <b>TS<sub>Cl</sub></b> | -3405.971390              | 23.1       | -3405.464740 | 18.0       | -3405.516050 | 20.4       |
| <sup>4</sup> <b>TS<sub>Cl</sub></b> | -3405.970910              | 23.4       | -3405.464467 | 18.1       | -3405.515828 | 20.6       |
| <sup>2</sup> <b>IM<sub>Cl</sub></b> | -3405.974169              | 21.4       | -3405.465677 | 17.4       | -3405.518382 | 19.0       |
| <sup>4</sup> <b>IM<sub>Cl</sub></b> | -3405.973946              | 21.5       | -3405.465447 | 17.5       | -3405.518748 | 18.7       |

a. Absolute energies are in au units and the relative ones are in kcal mol<sup>-1</sup> units.

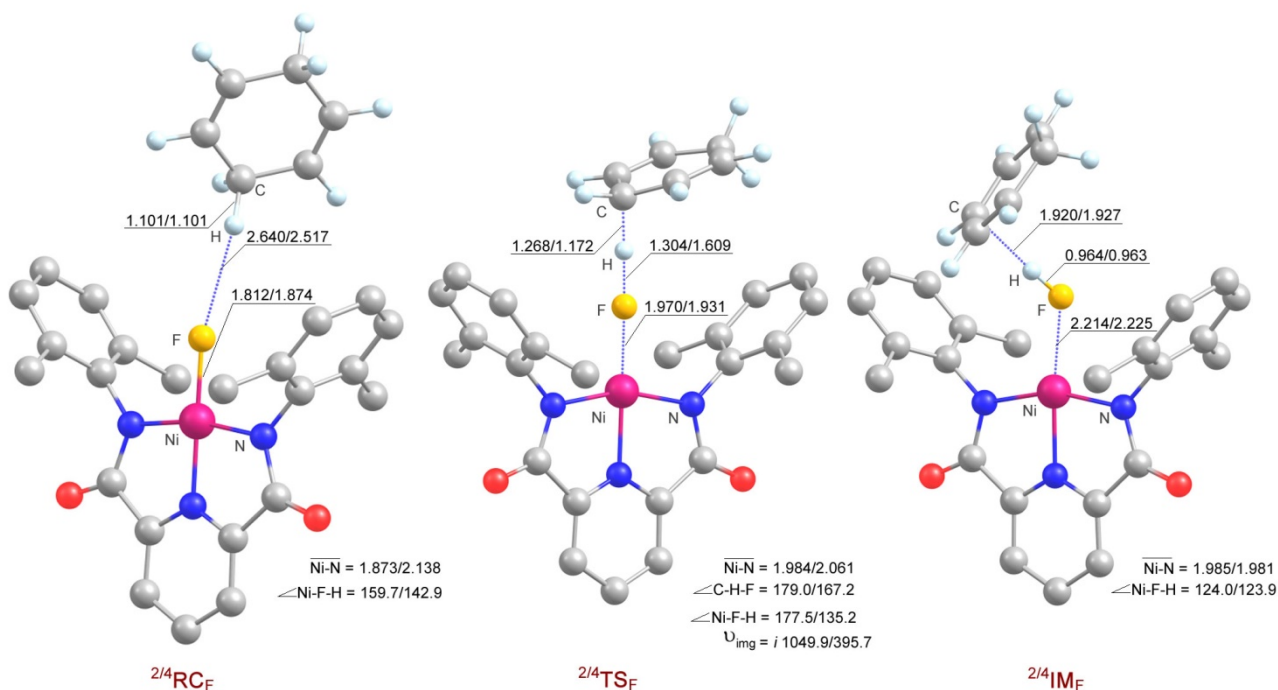

**Fig. S5** The optimized structures of the reaction intermediates in C-H bond activation of CHD by the oxidant **1<sub>F</sub>** on the doublet/quartet spin states. Lengths are in Å units, bond angles are in degree units and imaginary frequencies are in  $\text{cm}^{-1}$  units. Hydrogen atoms of the ligand are omitted for clarity. Calculations were done at the UB3LYP/B2 level in solvent.

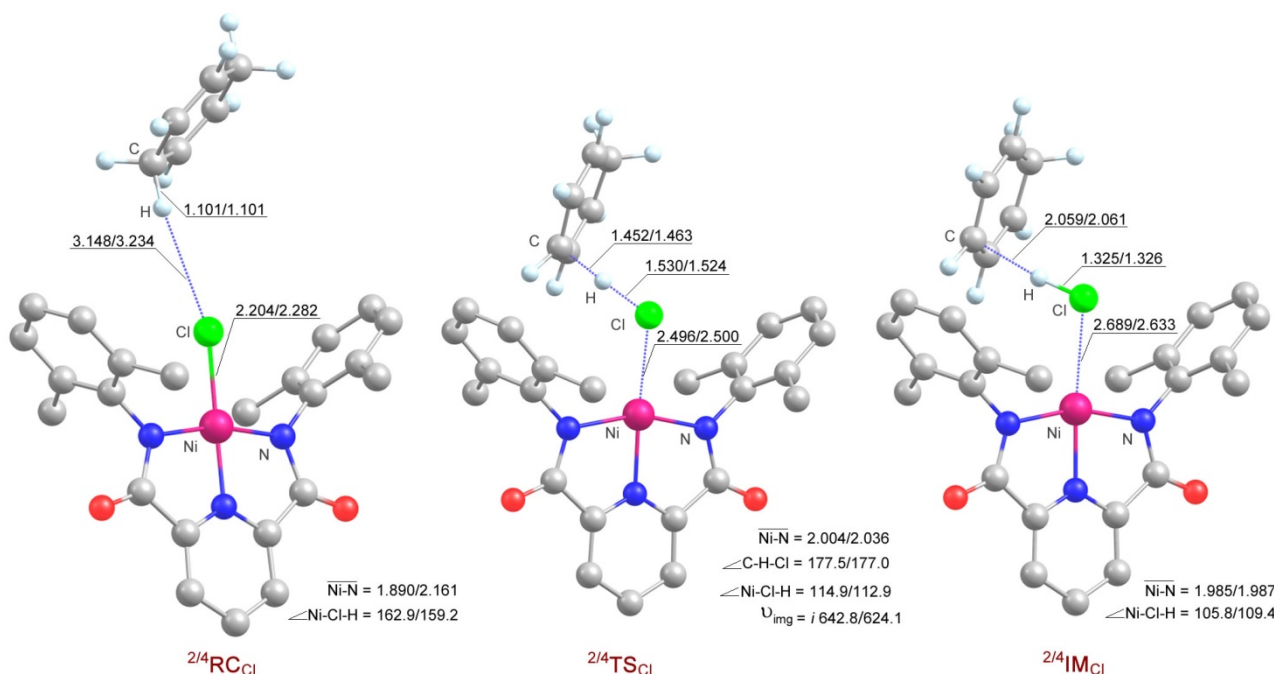

**Fig. S6** The optimized structures of the reaction intermediates in C-H bond activation of CHD by the oxidant **1<sub>Cl</sub>** on the doublet/quartet spin states. Lengths are in Å units, bond angles are in degree units and imaginary frequencies are in  $\text{cm}^{-1}$  units. Hydrogen atoms of the ligand are omitted for clarity. Calculations were done at the UB3LYP/B2 level in solvent.



**Table S8.** Mulliken charges and spin densities of the reaction intermediates in C-H bond activation of CHD by the oxidant **1<sub>F</sub>** on the doublet/quartet spin states. Calculations were done at the UB3LYP/B2 level in solvent.

|                                    | Spin density |      |       |       |       | Charge |       |       |      |       |
|------------------------------------|--------------|------|-------|-------|-------|--------|-------|-------|------|-------|
|                                    | Ni           | L    | F     | H     | Sub-H | Ni     | L     | F     | H    | Sub-H |
| <sup>2</sup> <b>RC<sub>F</sub></b> | 0.76         | 0.25 | -0.01 | 0.00  | 0.00  | 0.97   | -0.52 | -0.44 | 0.17 | -0.18 |
| <sup>4</sup> <b>RC<sub>F</sub></b> | 1.71         | 1.23 | 0.05  | 0.00  | 0.00  | 1.04   | -0.42 | -0.60 | 0.18 | -0.19 |
| <sup>2</sup> <b>TS<sub>F</sub></b> | 1.53         | 0.25 | -0.06 | -0.07 | -0.64 | 0.93   | -1.09 | -0.35 | 0.32 | 0.19  |
| <sup>4</sup> <b>TS<sub>F</sub></b> | 1.80         | 0.38 | 0.08  | 0.08  | 0.66  | 1.20   | -1.30 | -0.50 | 0.28 | 0.32  |
| <sup>2</sup> <b>IM<sub>F</sub></b> | 1.60         | 0.37 | 0.02  | -0.05 | -0.95 | 1.05   | -1.18 | -0.33 | 0.43 | 0.03  |
| <sup>4</sup> <b>IM<sub>F</sub></b> | 1.58         | 0.41 | 0.00  | 0.05  | 0.96  | 1.04   | -1.17 | -0.33 | 0.44 | 0.03  |

**Table S9.** Mulliken charges and spin densities of the reaction intermediates in C-H bond activation of CHD by the oxidant **1<sub>Cl</sub>** on the doublet/quartet spin states. Calculations were done at the UB3LYP/B2 level in solvent.

|                                     | Spin density |      |       |       |       | Charge |       |       |      |       |
|-------------------------------------|--------------|------|-------|-------|-------|--------|-------|-------|------|-------|
|                                     | Ni           | L    | Cl    | H     | Sub-H | Ni     | L     | Cl    | H    | Sub-H |
| <sup>2</sup> <b>RC<sub>Cl</sub></b> | 0.79         | 0.23 | -0.02 | 0.00  | 0.00  | 0.74   | -0.35 | -0.39 | 0.16 | -0.15 |
| <sup>4</sup> <b>RC<sub>Cl</sub></b> | 1.79         | 1.16 | 0.05  | 0.00  | 0.00  | 1.10   | -0.51 | -0.59 | 0.16 | -0.16 |
| <sup>2</sup> <b>TS<sub>Cl</sub></b> | 1.57         | 0.37 | -0.11 | -0.05 | -0.79 | 0.87   | -1.08 | -0.22 | 0.10 | 0.32  |
| <sup>4</sup> <b>TS<sub>Cl</sub></b> | 1.77         | 0.21 | 0.17  | 0.05  | 0.80  | 1.14   | -1.30 | -0.23 | 0.10 | 0.29  |
| <sup>2</sup> <b>IM<sub>Cl</sub></b> | 1.58         | 0.39 | 0.00  | -0.03 | -0.95 | 0.87   | -0.98 | -0.12 | 0.15 | 0.09  |
| <sup>4</sup> <b>IM<sub>Cl</sub></b> | 1.59         | 0.39 | 0.05  | 0.03  | 0.95  | 0.92   | -1.04 | -0.11 | 0.15 | 0.09  |

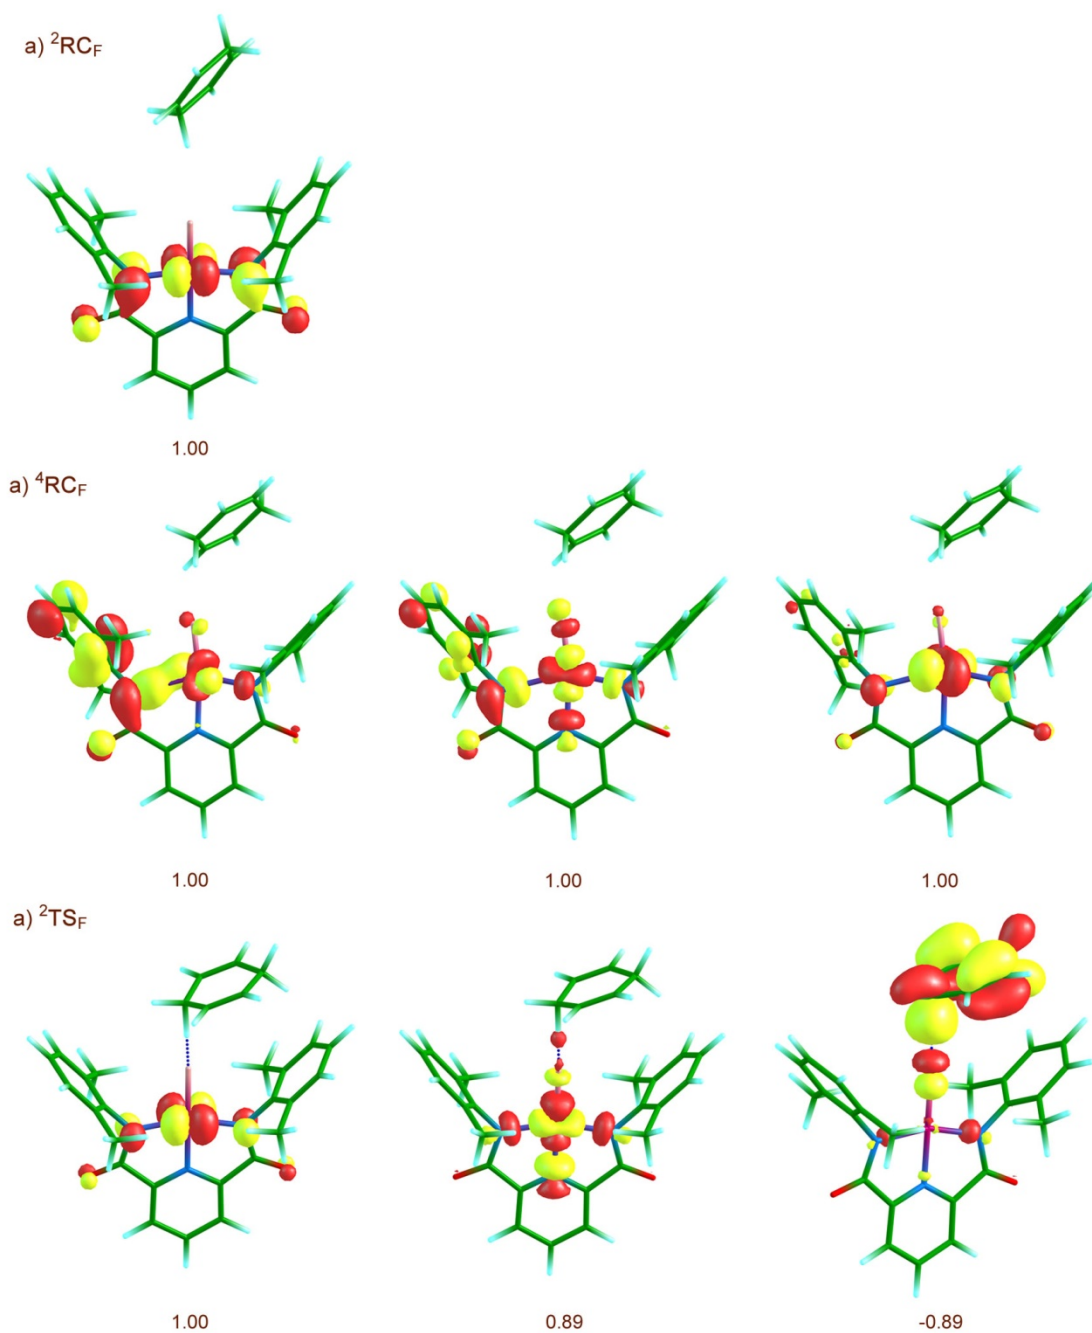

**Fig. S7** Singly-occupied natural orbitals (SNOs) of the reaction intermediates in C-H bond activation of CHD by the oxidant  $1_F$  on the doublet/quartet spin states. Calculations were done at the UB3LYP/B2 level in solvent. Positive values represent alpha-electron occupations and negative ones represent beta-electron occupations. (To be continued.)

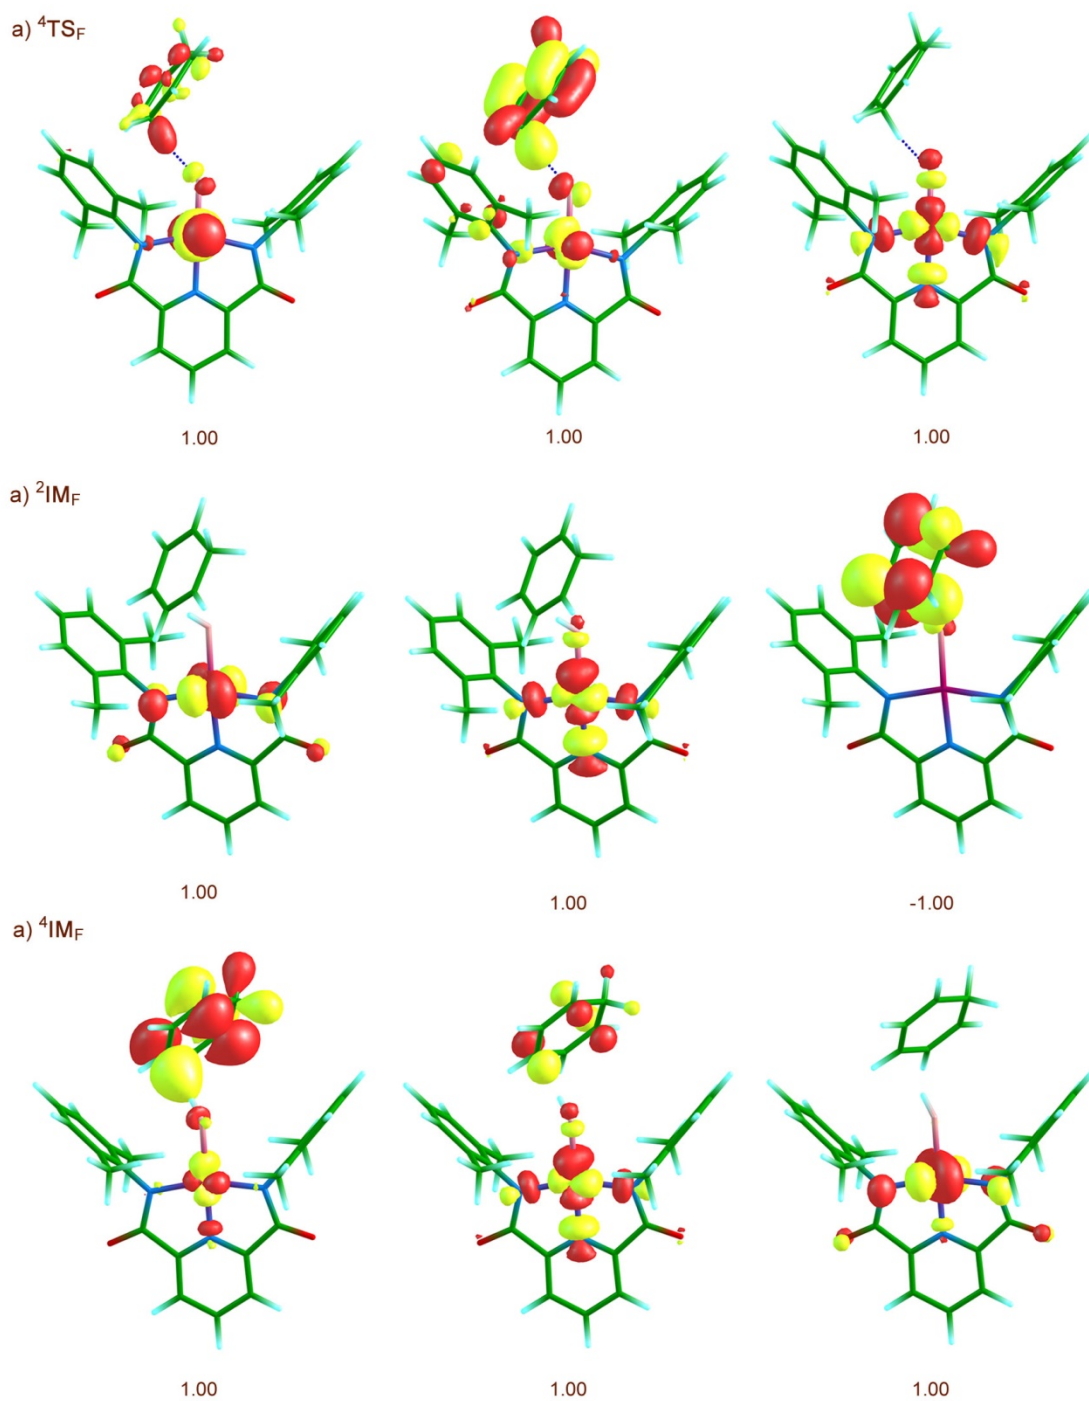

**Fig. S7** Singly-occupied natural orbitals (SNOs) of the reaction intermediates in C-H bond activation of CHD by the oxidant  $\mathbf{1}_F$  on the doublet/quartet spin states. Calculations were done at the UB3LYP/B2 level in solvent. Positive values represent alpha-electron occupations and negative ones represent beta-electron occupations.

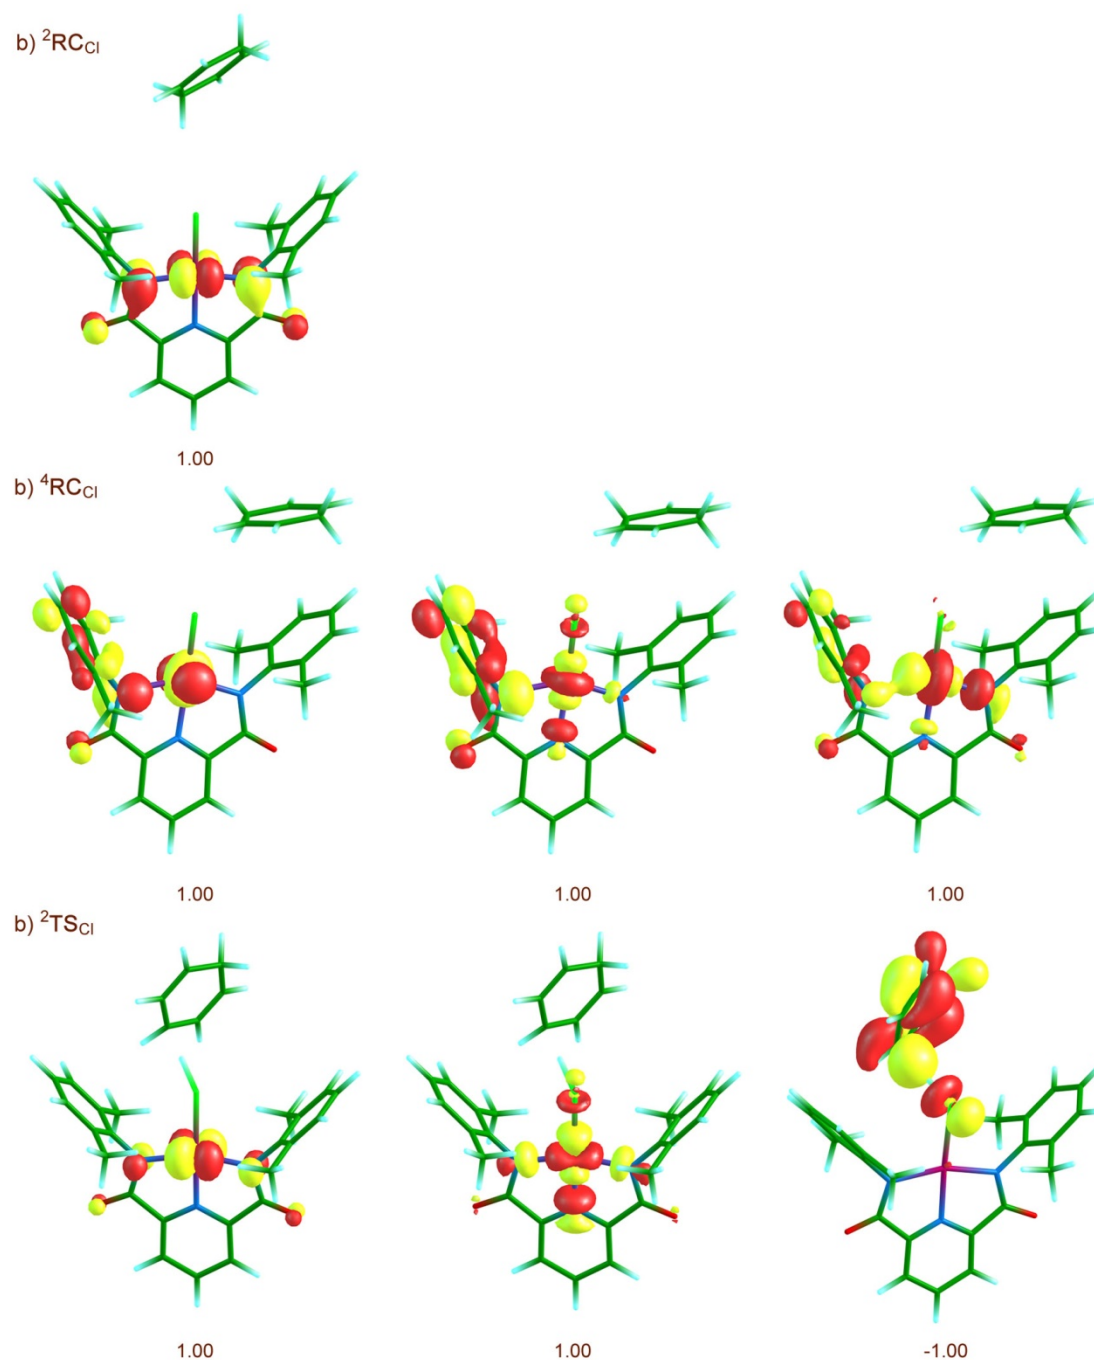

**Fig. S8** Singly-occupied natural orbitals (SNOs) of the reaction intermediates in C-H bond activation of CHD by the oxidant  $\mathbf{1}_{\text{Cl}}$  on the doublet/quartet spin states. Calculations were done at the UB3LYP/B2 level in solvent. Positive values represent alpha-electron occupations and negative ones represent beta-electron occupations. (To be continued.)

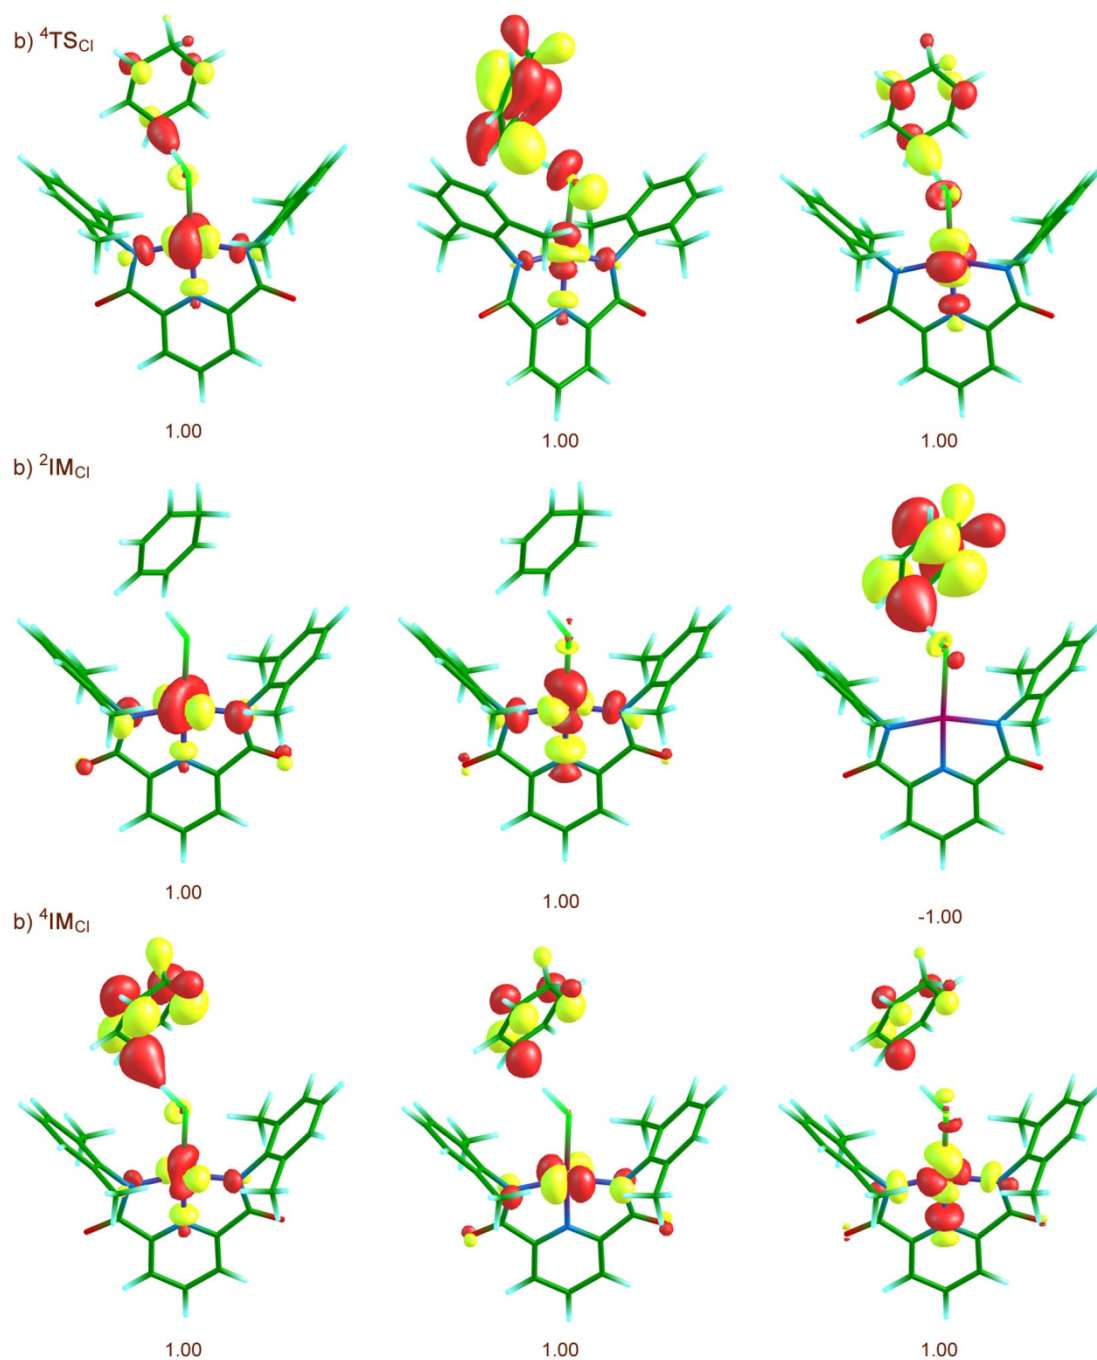

**Fig. S8** Singly-occupied natural orbitals (SNOs) of the reaction intermediates in C-H bond activation of CHD by the oxidant  $1_{\text{Cl}}$  on the doublet/quartet spin states. Calculations were done at the UB3LYP/B2 level in solvent. Positive values represent alpha-electron occupations and negative ones represent beta-electron occupations.

## Part III. Desaturation vs. Halogenation of the CHD-H radical

### Part III-1: desaturation vs. halogenation by the oxidant $1_F$

**Table S10.** Various SCF and free energies of the reaction intermediates in the CHD-H radical halogenation by  $1_F$ . Calculations were done at the UB3LYP/B2 level in solvent.

|                 | OPT/B2                    | $\Delta E$ | OPT +ZPE     | $\Delta E$ | G            | $\Delta G$ |
|-----------------|---------------------------|------------|--------------|------------|--------------|------------|
| $^3\text{IM}'$  | -3045.041082 <sup>a</sup> | 0.0        | -3044.538431 | 0.0        | -3044.591009 | 0.0        |
| $^3\text{TS}_2$ | -3045.040149              | 0.6        | -3044.536712 | 1.1        | -3044.587071 | 2.5        |
| $^3\text{PC}_F$ | -3045.043726              | -1.7       | -3044.538324 | 0.1        | -3044.588769 | 1.4        |

a. Absolute energies are in au units and the relative ones are in kcal mol<sup>-1</sup> units.

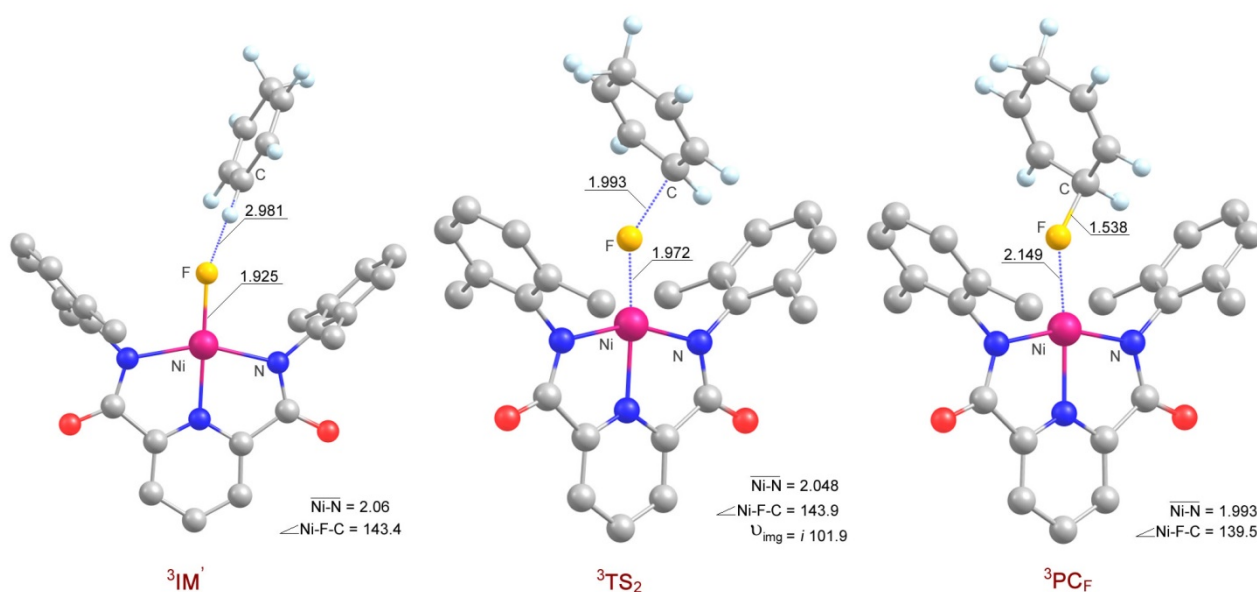

**Fig. S9** The optimized structures of the reaction intermediates in the CHD-H radical halogenation by  $1_F$ . Lengths are in Å units, bond angles are in degree units and the imaginary frequencies are in cm<sup>-1</sup> units. Hydrogen atoms of the ligand are omitted for clarity. Calculations were done at the UB3LYP/B2 level in solvent.

**Table S11.** Mulliken charges and spin densities of the reaction intermediates in the CHD-H radical halogenation by **1<sub>F</sub>**. Calculations were done at the UB3LYP/B2 level in solvent.

|                                    | Spin density |      |      |       | Charge |       |       |       |
|------------------------------------|--------------|------|------|-------|--------|-------|-------|-------|
|                                    | Ni           | L    | F    | Sub-H | Ni     | L     | F     | Sub-H |
| <sup>3</sup> <b>IM'</b>            | 1.79         | 0.17 | 0.03 | 0.00  | 1.19   | -1.53 | -0.60 | 0.95  |
| <sup>3</sup> <b>TS<sub>2</sub></b> | 1.78         | 0.19 | 0.02 | 0.02  | 1.24   | -1.48 | -0.38 | 0.62  |
| <sup>3</sup> <b>PC<sub>F</sub></b> | 1.60         | 0.38 | 0.01 | 0.01  | 1.07   | -1.22 | -0.13 | 0.27  |

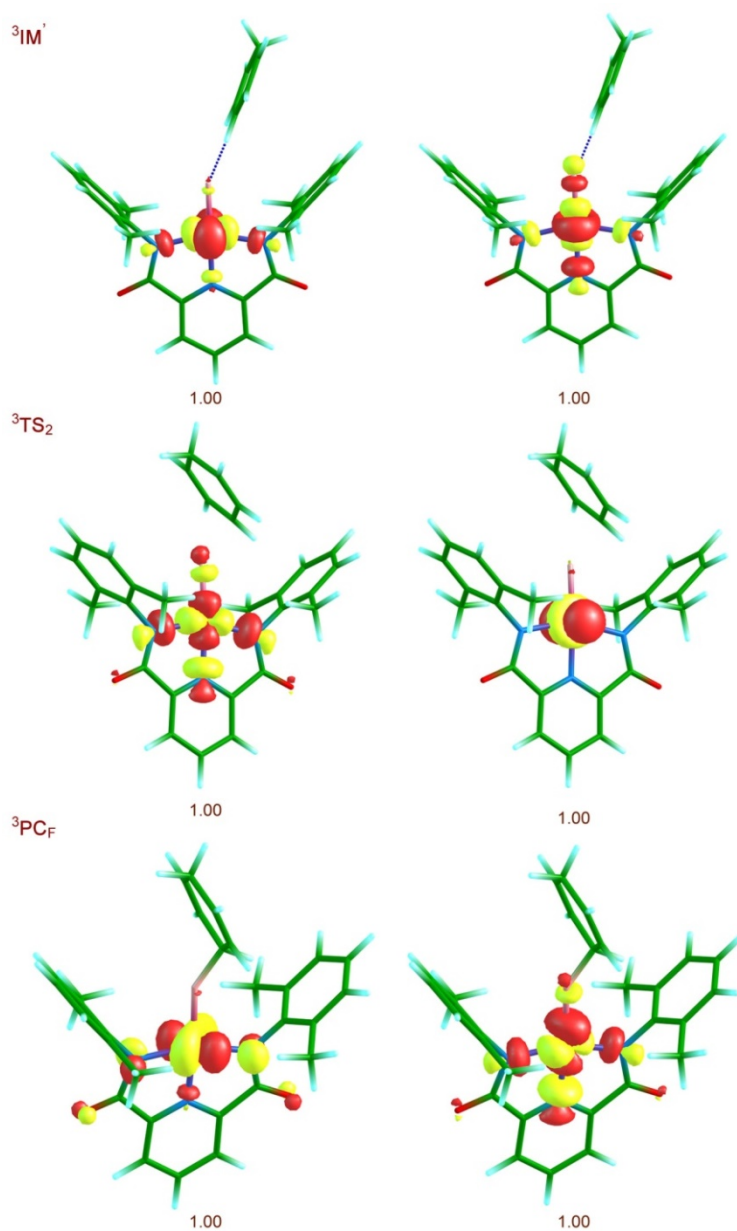

**Fig. S10** Singly-occupied natural orbitals (SNOs) of the reaction intermediates in the CHD-H radical halogenation by **1<sub>F</sub>**. Positive values represent alpha-electron occupations.

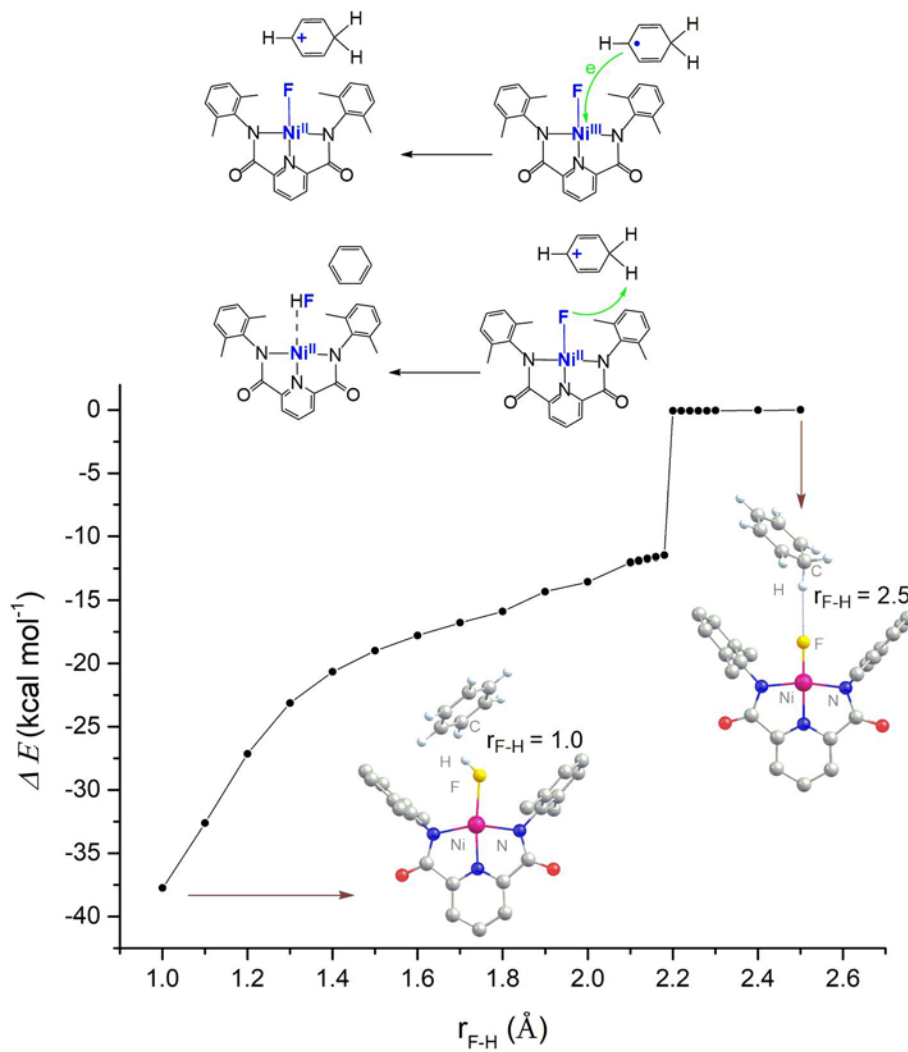

**Fig. S11** The SCF energy plot of the relaxed scan along the F-H distance. Lengths are in Å units. Calculations were done at the UB3LYP/B2 level in solvent. Energies are in kcal mol<sup>-1</sup>.



## Part III-2: desaturation vs. halogenation by AgF

**Table S12.** Various SCF and free energies of the reaction intermediates in the CHD-H radical desaturation by the inorganic salt AgF in the absence of **1<sub>F</sub>**. Calculations were done at the UB3LYP/B2 level in solvent.

|                                    | OPT/B2                   | $\Delta E$ | OPT +ZPE    | $\Delta E$ | G           | $\Delta G$ |
|------------------------------------|--------------------------|------------|-------------|------------|-------------|------------|
| <b><sup>2</sup>IM0</b>             | -478.488577 <sup>a</sup> | 0.0        | -478.377427 | 0.0        | -478.404545 | 0.0        |
| <b><sup>2</sup>TS0<sub>H</sub></b> | -478.450723              | 23.8       | -478.344725 | 20.5       | -478.371476 | 20.8       |
| <b><sup>2</sup>PC0<sub>H</sub></b> | -478.493489              | -3.1       | -478.382113 | -2.9       | -478.414803 | -6.4       |

a. Absolute energies are in au units and the relative ones are in kcal mol<sup>-1</sup> units.

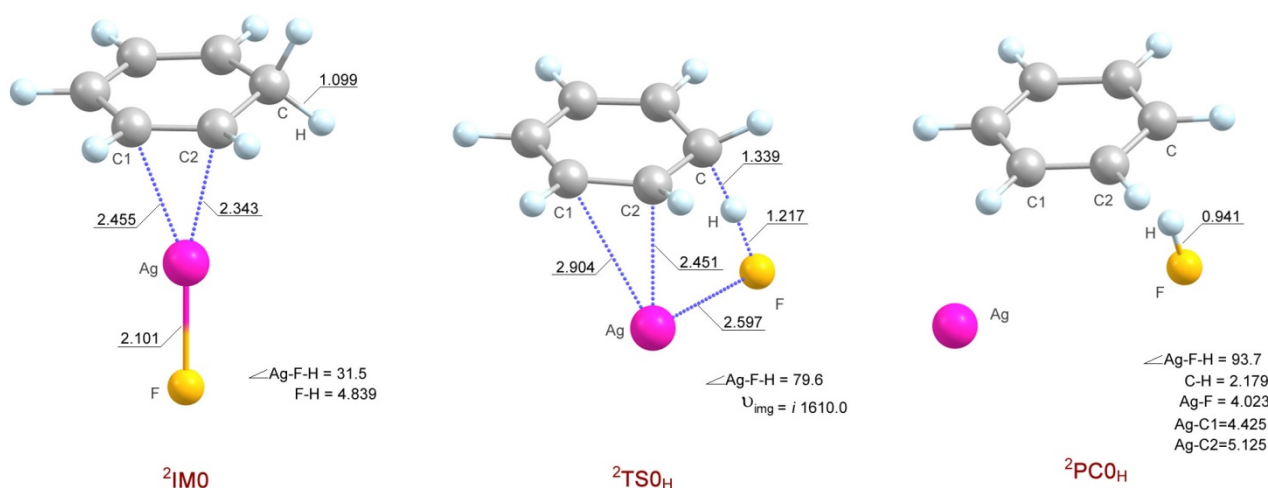

**Fig. S12** Optimized structures of the reaction intermediates in the CHD-H radical desaturation by the inorganic salt AgF in the absence of **1<sub>F</sub>**. Calculations were done at the UB3LYP/B2 level in solvent. Lengths are in Å units, bond angles are in degree units and the imaginary frequencies are in cm<sup>-1</sup> units.

**Table S13.** Mulliken charges and spin densities of the reaction intermediates in the CHD-H radical desaturation by the inorganic salt AgF in the absence of **1<sub>F</sub>**. Calculations were done at the UB3LYP/B2 level in solvent.

|                                    | Spin density |      |      |       | Charge |       |      |       |
|------------------------------------|--------------|------|------|-------|--------|-------|------|-------|
|                                    | Ag           | F    | H    | Sub-H | Ag     | F     | H    | Sub-H |
| <b><sup>2</sup>IM0</b>             | 0.08         | 0.00 | 0.04 | 0.88  | 0.38   | -0.76 | 0.18 | 0.20  |
| <b><sup>2</sup>TS0<sub>H</sub></b> | 0.38         | 0.04 | 0.05 | 0.52  | 0.35   | -0.59 | 0.37 | -0.13 |
| <b><sup>2</sup>PC0<sub>H</sub></b> | 0.99         | 0.00 | 0.00 | 0.01  | 0.03   | -0.43 | 0.41 | -0.01 |

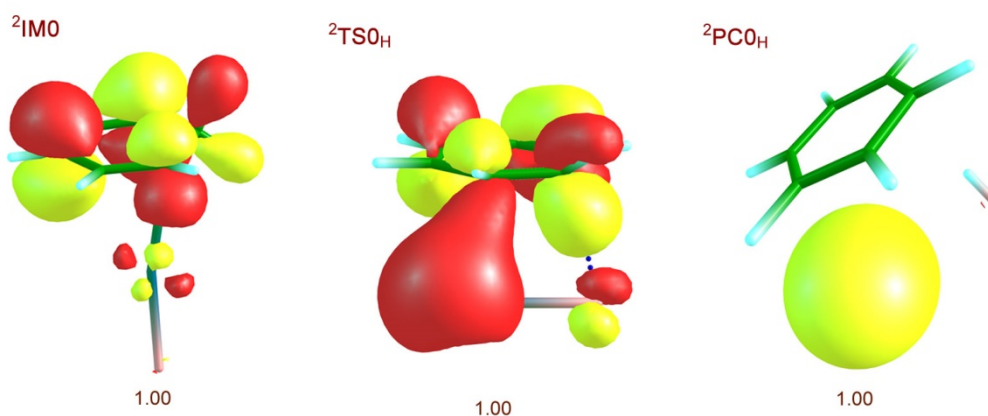

**Fig. S13** Singly-occupied natural orbitals (SNOs) of the reaction intermediates in the CHD-H radical desaturation by the inorganic salt AgF in the absence of **1<sub>F</sub>**. Calculations were done at the UB3LYP/B2 level in solvent. Positive values represent alpha-electron occupations.

**Table S14.** Various SCF and free energies of the reaction intermediates in the CHD-H radical halogenation by the inorganic salt AgF in the absence of **1F**. Calculations were done at the UB3LYP/B2 level in solvent.

|                  | OPT/B2                   | $\Delta E$ | OPT +ZPE    | $\Delta E$ | G           | $\Delta G$ |
|------------------|--------------------------|------------|-------------|------------|-------------|------------|
| $^2\text{IM0}$   | -478.488577 <sup>a</sup> | 0.0        | -478.377427 | 0.0        | -478.404545 | 0.0        |
| $^2\text{TS0}_F$ | -478.430452              | 36.5       | -478.318887 | 36.7       | -478.346254 | 36.6       |
| $^2\text{PC0}_F$ | -478.449850              | 24.3       | -478.335578 | 26.3       | -478.365325 | 24.6       |

a. Absolute energies are in au units and the relative ones are in kcal mol<sup>-1</sup> units.

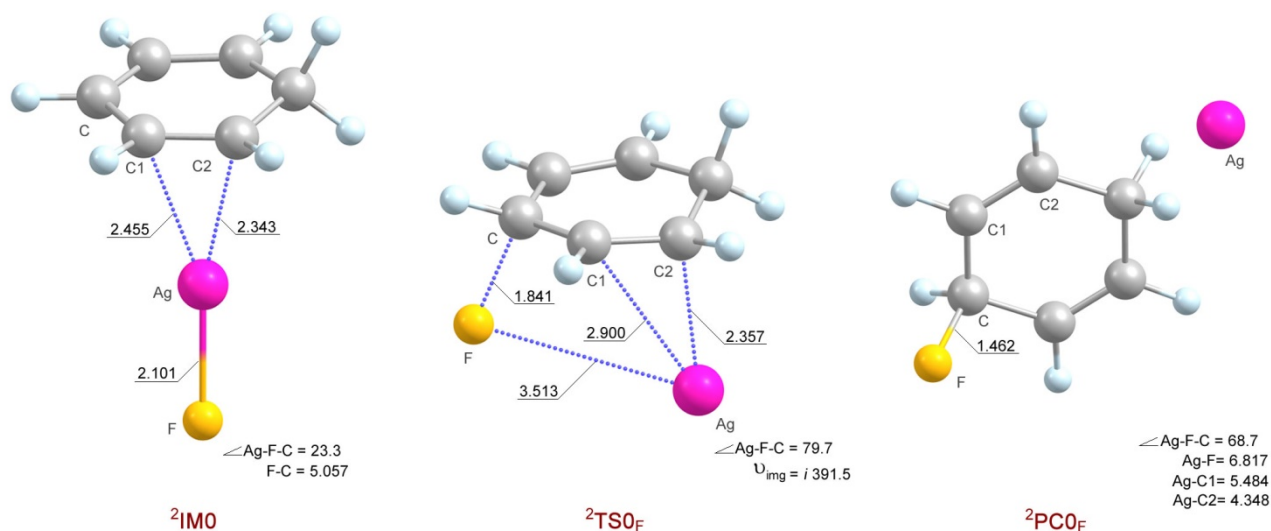

**Fig. S14** Optimized structures of the reaction intermediates in the CHD-H radical halogenation by the inorganic salt AgF in the absence of **1F**. Calculations were done at the UB3LYP/B2 level in solvent. Lengths are in Å units, bond angles are in degree units and the imaginary frequencies are in cm<sup>-1</sup> units.

**Table S15.** Mulliken charges and spin densities of the reaction intermediates in the CHD-H radical halogenation by the inorganic salt AgF in the absence of **1<sub>F</sub>**. Calculations were done at the UB3LYP/6-31+G\*\* level in solvent.

|                                     | Spin density |      |       | Charge |       |       |
|-------------------------------------|--------------|------|-------|--------|-------|-------|
|                                     | Ag           | F    | Sub-H | Ag     | F     | Sub-H |
| <sup>2</sup> <b>IM0</b>             | 0.08         | 0.00 | 0.92  | 0.38   | -0.76 | 0.38  |
| <sup>2</sup> <b>TS0<sub>F</sub></b> | 0.57         | 0.08 | 0.34  | 0.18   | -0.58 | 0.40  |
| <sup>2</sup> <b>PC0<sub>F</sub></b> | 0.99         | 0.00 | 0.01  | 0.02   | -0.36 | 0.34  |

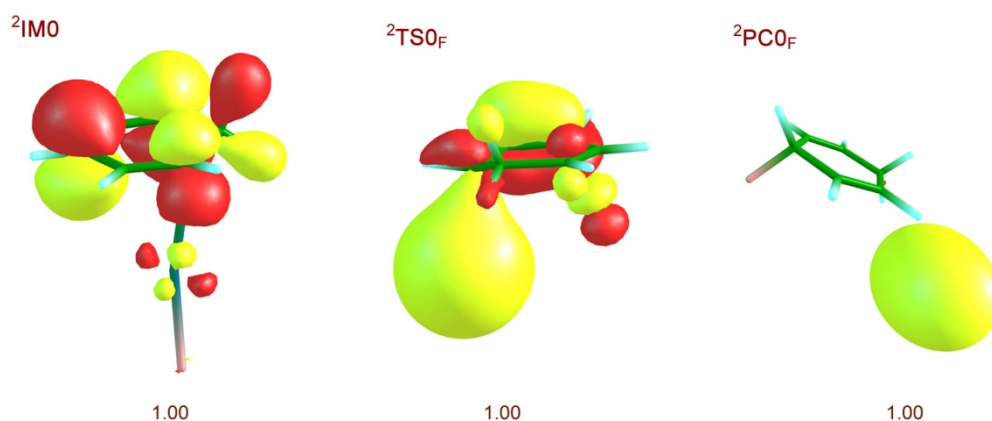

**Fig. S15** Singly-occupied natural orbitals (SNOs) of the reaction intermediates in the CHD-H radical halogenation by the inorganic salt AgF in the absence of **1<sub>F</sub>**. Calculations were done at the UB3LYP/B2 level in solvent. Positive values represent alpha-electron occupations.

## Part IV: The nature of the AgF-binging Ni(III)-F oxidant $\mathbf{1}_{\text{F-Ag-F}}$

**Table S16.** Various SCF and free energies of  $\mathbf{1}_{\text{F-Ag-F}}$  on the different spin states. Calculations were done at the UB3LYP/B2 level in solvent.

|                | OPT/B2                    | $\Delta E$ | OPT +ZPE     | $\Delta E$ | G            | $\Delta G$ |
|----------------|---------------------------|------------|--------------|------------|--------------|------------|
| $^2\mathbf{2}$ | -3057.883095 <sup>a</sup> | 0.0        | -3057.487409 | 0.0        | -3057.534426 | 0.0        |
| $^4\mathbf{2}$ | -3057.860430              | 14.2       | -3057.466808 | 12.9       | -3057.516019 | 11.6       |
| $^6\mathbf{2}$ | -3057.774551              | 68.1       | -3057.384497 | 64.6       | -3057.432460 | 64.0       |

a. Absolute energies are in au units and the relative ones are in kcal mol<sup>-1</sup> units.

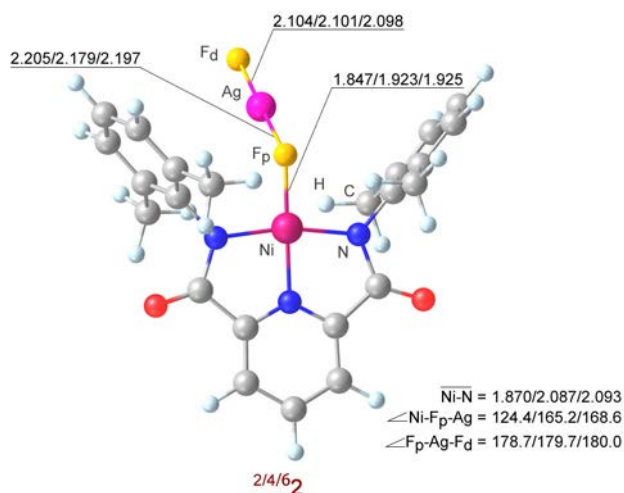

**Fig. S16** The optimized structures of  $\mathbf{1}_{\text{F-Ag-F}}$  on the doublet/quartet/sextet spin states. Lengths are in Å units, bond angles are in degree units. Calculations were done at the UB3LYP/B2 level in solvent.

**Table S17.** Mulliken charges and spin densities of  $\mathbf{1}_{\text{F-Ag-F}}$  on the different spin states. Calculations were done at the UB3LYP/B2 level in solvent.

|                | Spin density |      |                |                |      | Charge |       |                |                |      |
|----------------|--------------|------|----------------|----------------|------|--------|-------|----------------|----------------|------|
|                | Ni           | L    | F <sub>p</sub> | F <sub>d</sub> | Ag   | Ni     | L     | F <sub>p</sub> | F <sub>d</sub> | Ag   |
| $^2\mathbf{2}$ | 0.74         | 0.27 | -0.01          | 0.00           | 0.00 | 1.02   | -0.44 | -0.41          | -0.74          | 0.56 |
| $^4\mathbf{2}$ | 1.70         | 1.26 | 0.03           | 0.00           | 0.01 | 0.97   | -0.30 | -0.48          | -0.76          | 0.56 |
| $^6\mathbf{2}$ | 1.83         | 3.14 | 0.02           | 0.00           | 0.01 | 0.99   | -0.29 | -0.50          | -0.75          | 0.55 |

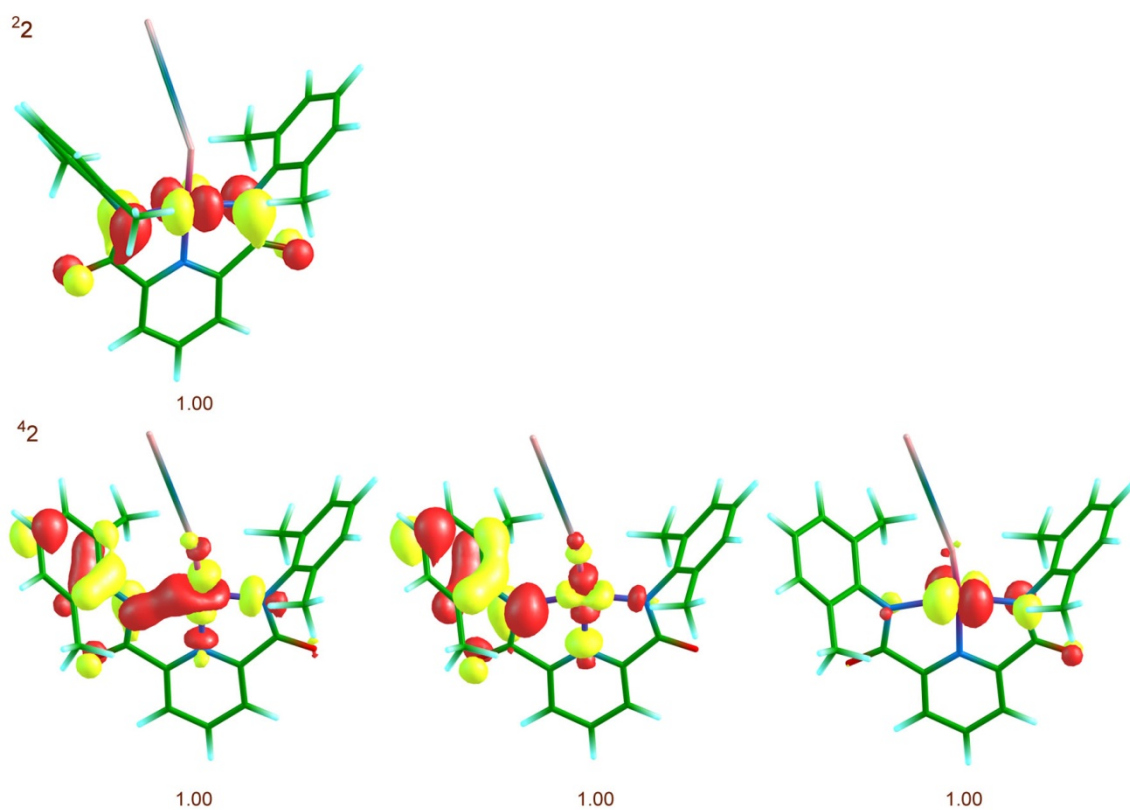

**Fig. S17** Singly-occupied natural orbitals (SNOs) of  $\mathbf{1}_{\text{F-Ag-F}}$  on the different spin states. Calculations were done at the UB3LYP/B2 level in solvent. Positive values represent alpha-electron occupations.

## Part V: C-H bond activation of CHD by the proximal fluorine of $\mathbf{1}_{\text{F-Ag-F}}$

**Table S18.** Various SCF and free energies of the reaction intermediates in C-H bond activation of CHD by the proximal fluorine  $\text{F}_p$  of  $\mathbf{1}_{\text{F-Ag-F}}$  on different spin states. Calculations were done at the UB3LYP/B2 level in solvent.

|                      | OPT/B2                    | $\Delta E$ | OPT +ZPE     | $\Delta E$ | G            | $\Delta G$ |
|----------------------|---------------------------|------------|--------------|------------|--------------|------------|
| $^2\mathbf{RC}_p$    | -3291.320966 <sup>a</sup> | 0.0        | -3290.803150 | 0.0        | -3290.861761 | 0.0        |
| $^4\mathbf{RC}_p$    | -3291.304015              | 10.6       | -3290.788022 | 9.5        | -3290.849066 | 8.0        |
| $^2\mathbf{TS}_{pH}$ | -3291.287526              | 21.0       | -3290.777423 | 16.1       | -3290.832069 | 18.6       |
| $^4\mathbf{TS}_{pH}$ | -3291.284245              | 23.0       | -3290.773509 | 18.6       | -3290.828403 | 20.9       |
| $^2\mathbf{IM}_p$    | -3291.308120              | 8.1        | -3290.792504 | 6.7        | -3290.847315 | 9.1        |
| $^4\mathbf{IM}_p$    | -3291.292585              | 17.8       | -3290.779493 | 14.8       | -3290.836345 | 15.9       |

a. Absolute energies are in au units and the relative ones are in kcal mol<sup>-1</sup> units.

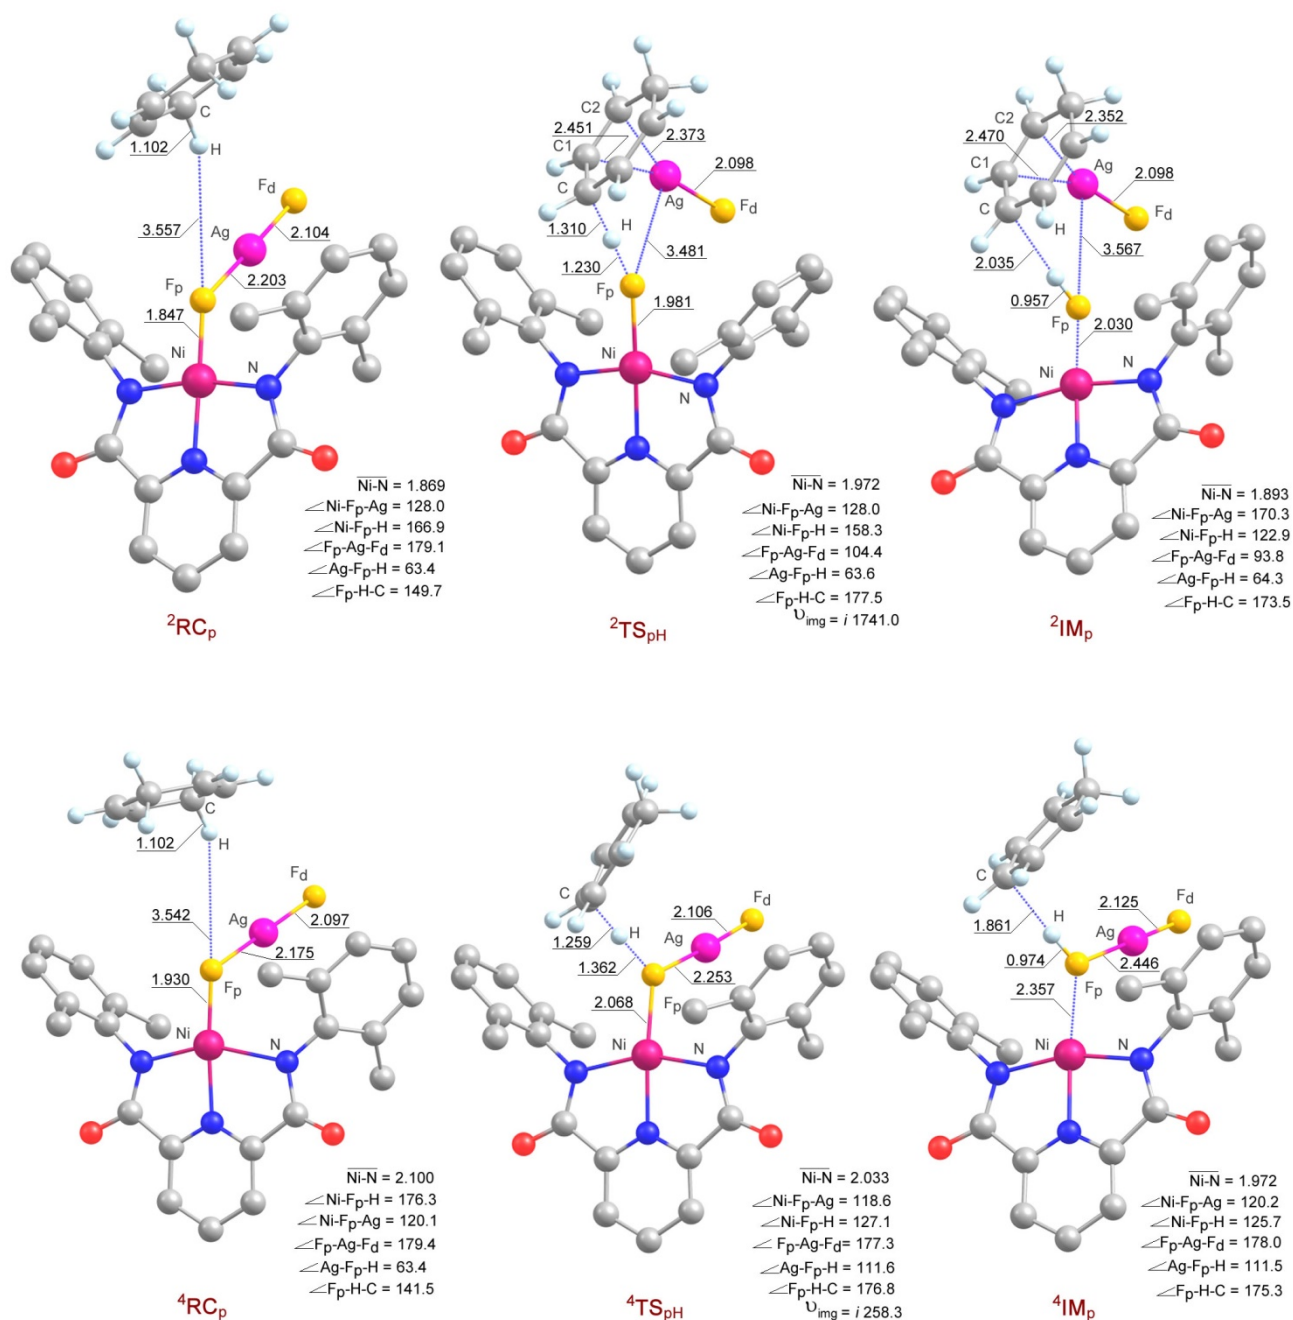

**Fig. S18** The optimized structures of the reaction intermediates in C-H bond activation of CHD by the proximal fluorine F<sub>p</sub> of **1**F-Ag-F on the doublet/quartet/sextet spin states. Calculations were done at the UB3LYP/B2 level in solvent. Lengths are in Å units, bond angles are in degree units and imaginary frequencies are in cm<sup>-1</sup> units. Hydrogen atoms of the ligand are omitted for clarity.



**Table S19.** Mulliken charges and spin densities of the reaction intermediates in C-H bond activation of CHD by the proximal fluorine F<sub>p</sub> of **1**<sub>F-Ag-F</sub> on different spin states. Calculations were done at the UB3LYP/B2 level in solvent.

|                                      | Spin density |      |                |                |       |       |       | Charge |       |                |                |      |      |       |
|--------------------------------------|--------------|------|----------------|----------------|-------|-------|-------|--------|-------|----------------|----------------|------|------|-------|
|                                      | Ni           | L    | F <sub>p</sub> | F <sub>d</sub> | Ag    | H     | Sub-H | Ni     | L     | F <sub>p</sub> | F <sub>d</sub> | Ag   | H    | Sub-H |
| <sup>2</sup> <b>RC</b> <sub>p</sub>  | 0.74         | 0.27 | -0.01          | 0.00           | 0.00  | 0.00  | 0.00  | 1.00   | -0.41 | -0.40          | -0.74          | 0.56 | 0.15 | -0.16 |
| <sup>4</sup> <b>RC</b> <sub>p</sub>  | 1.80         | 1.16 | 0.03           | 0.00           | 0.01  | 0.00  | 0.00  | 1.15   | -0.41 | -0.54          | -0.74          | 0.55 | 0.15 | -0.16 |
| <sup>2</sup> <b>TS</b> <sub>pH</sub> | 1.49         | 0.25 | -0.07          | 0.00           | -0.05 | -0.05 | -0.57 | 1.01   | -1.07 | -0.33          | -0.75          | 0.40 | 0.34 | 0.40  |
| <sup>4</sup> <b>TS</b> <sub>pH</sub> | 1.77         | 0.22 | 0.06           | 0.00           | 0.01  | 0.12  | 0.81  | 1.29   | -1.43 | -0.44          | -0.74          | 0.61 | 0.33 | 0.39  |
| <sup>2</sup> <b>IM</b> <sub>p</sub>  | 1.59         | 0.39 | 0.02           | 0.00           | -0.07 | -0.03 | -0.91 | 1.07   | -1.20 | -0.30          | -0.76          | 0.39 | 0.42 | 0.38  |
| <sup>4</sup> <b>IM</b> <sub>p</sub>  | 1.57         | 0.43 | -0.01          | 0.00           | 0.00  | 0.06  | 0.95  | 1.12   | -1.21 | -0.35          | -0.75          | 0.70 | 0.43 | 0.05  |

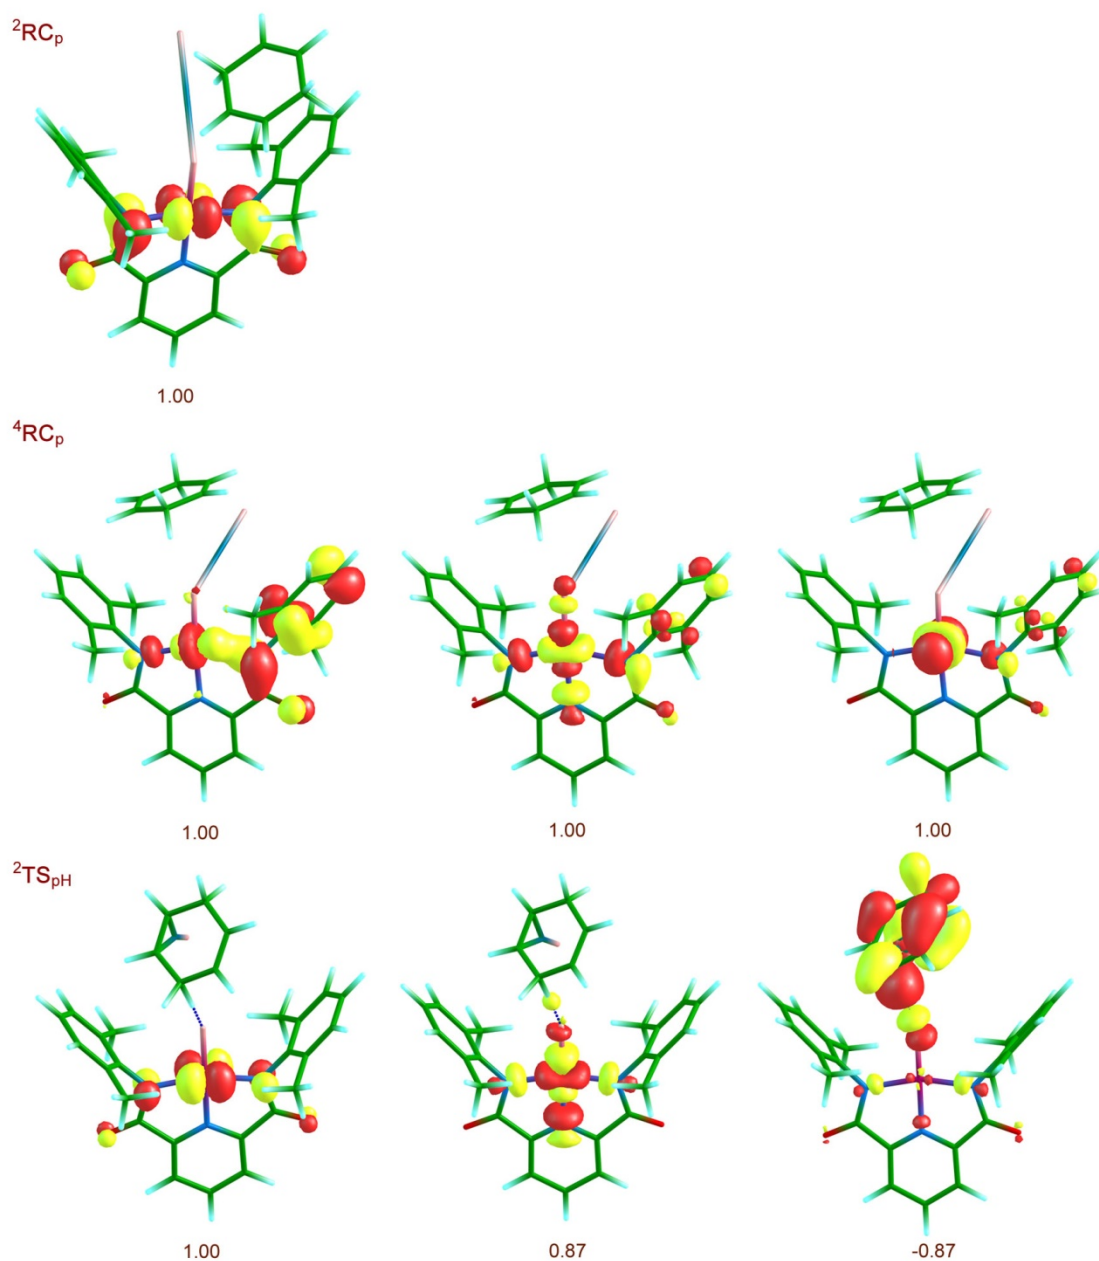

**Fig. S19** Singly-occupied natural orbitals (SNOs) of the reaction intermediates in C-H bond activation of CHD by the proximal fluorine  $F_p$  of  $\mathbf{1}_{F-Ag-F}$  on different spin states. Calculations were done at the UB3LYP/B2 level in solvent. Positive values represent alpha-electron occupancies. (To be continued.)

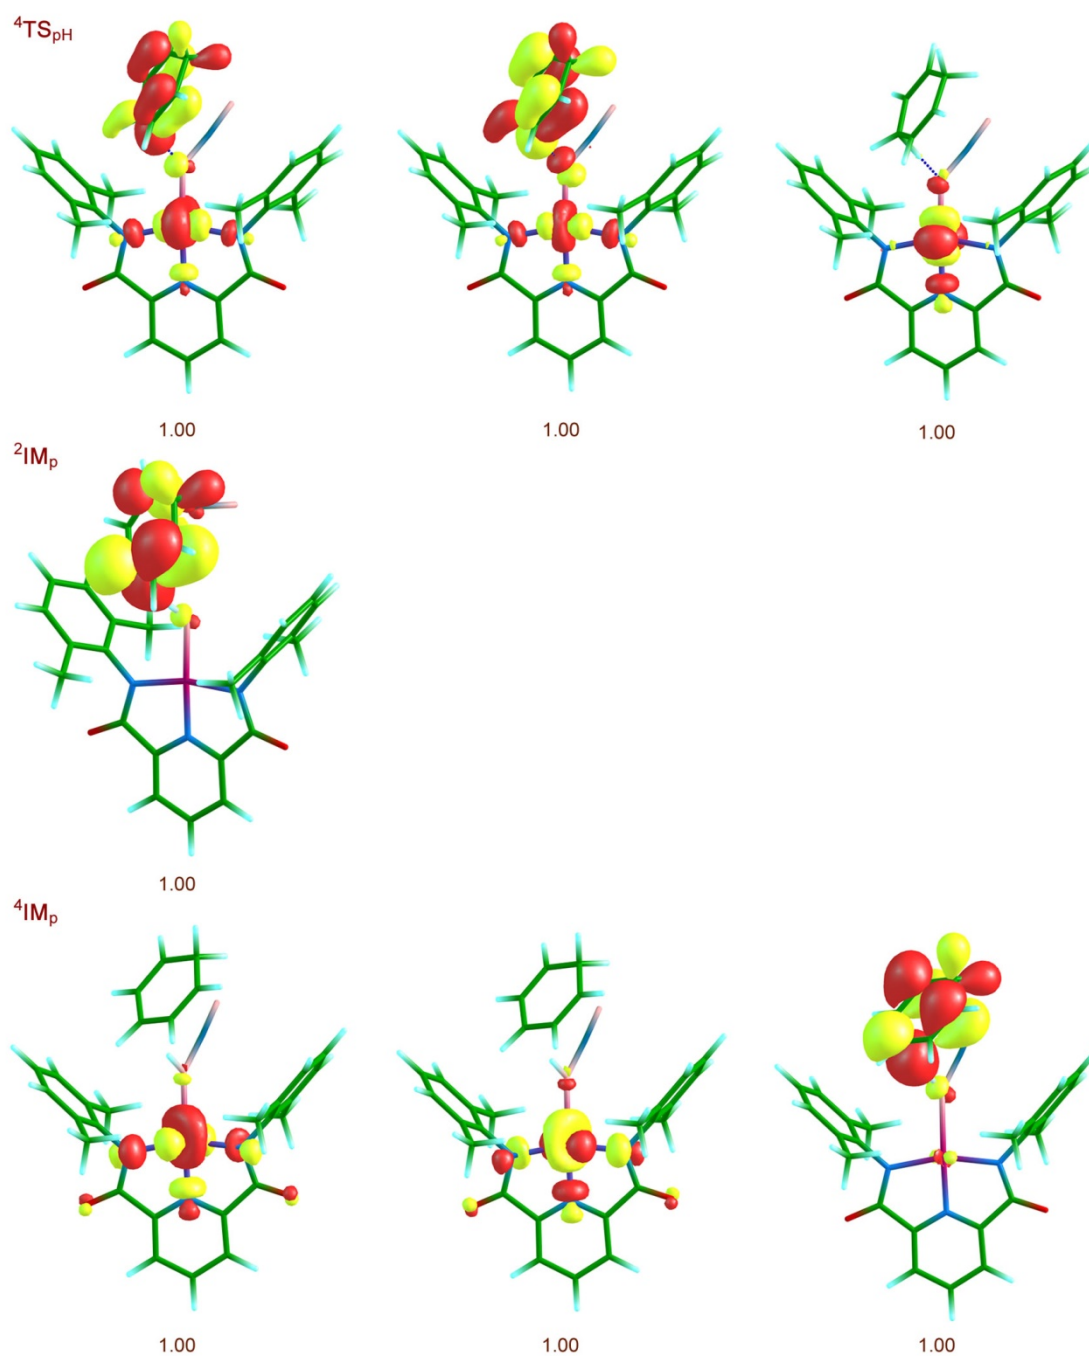

**Fig. S19** Singly-occupied natural orbitals (SNOs) of the reaction intermediates in C-H bond activation of CHD by the proximal fluorine  $F_p$  of  $\mathbf{1}_{F-Ag-F}$  on different spin states. Calculations were done at the UB3LYP/B2 level in solvent. Positive values represent alpha-electron occupations.

**Table S20.** Various SCF and free energies of the reaction intermediates in halogenation of CHD-H radical by the proximal fluorine  $F_p$  of  $1_{F-Ag-F}$  on different spin states. Calculations were done at the UB3LYP/B2 level in solvent.

|              | OPT/B2                    | $\Delta E$ | OPT +ZPE     | $\Delta E$ | G            | $\Delta G$ |
|--------------|---------------------------|------------|--------------|------------|--------------|------------|
| $^3IM'_p$    | -3290.718991 <sup>a</sup> | 0.0        | -3290.214213 | 0.0        | -3290.269331 | 0.0        |
| $^3TS2_{pF}$ | -3290.707537              | 7.2        | -3290.201229 | 8.1        | -3290.254555 | 9.3        |
| $^3PC_{pF}$  | -3290.716502              | 1.6        | -3290.208357 | 3.7        | -3290.261485 | 4.9        |

a. Absolute energies are in au units and the relative ones are in kcal mol<sup>-1</sup> units.

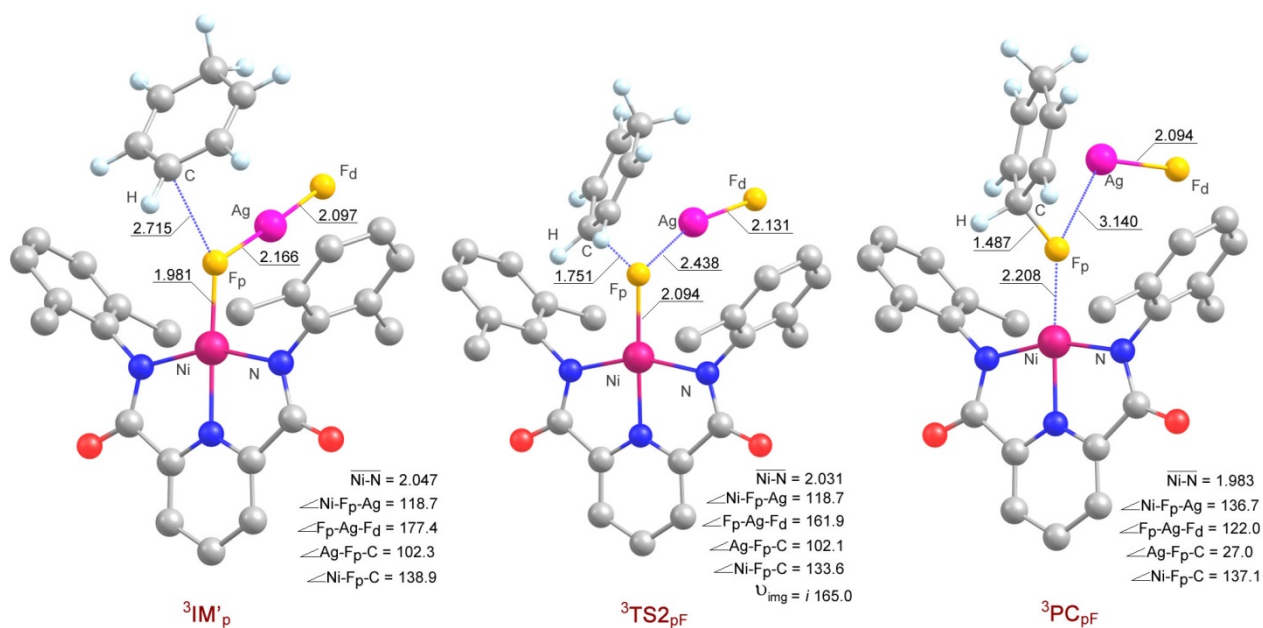

**Fig. S20** The optimized structures of the reaction intermediates in halogenation of CHD-H radical by the proximal fluorine  $F_p$  of  $1_{F-Ag-F}$  on different spin states. Calculations were done at the UB3LYP/B2 level in solvent. Lengths are in Å units, bond angles are in degree units and the imaginary frequencies are in cm<sup>-1</sup> units. Hydrogen atoms of the ligand are omitted for clarity.

**Table S21.** Mulliken charges and spin densities of the reaction intermediates in halogenation of CHD-H radical by the proximal fluorine  $F_p$  of  $\mathbf{1}_{F-Ag-F}$  on the triplet spin state. Calculations were done at the UB3LYP/B2 level in solvent.

|                        | Spin density |      |       |       |      |       | Charge |       |       |       |      |       |
|------------------------|--------------|------|-------|-------|------|-------|--------|-------|-------|-------|------|-------|
|                        | Ni           | L    | $F_p$ | $F_d$ | Ag   | Sub-H | Ni     | L     | $F_p$ | $F_d$ | Ag   | Sub-H |
| ${}^3\mathbf{IM}'_p$   | 1.78         | 0.19 | 0.02  | 0.00  | 0.01 | 0.00  | 1.25   | -1.50 | -0.49 | -0.74 | 0.51 | 0.97  |
| ${}^3\mathbf{TS}_{pF}$ | 1.76         | 0.22 | 0.01  | 0.00  | 0.00 | 0.01  | 1.32   | -1.44 | -0.28 | -0.75 | 0.51 | 0.64  |
| ${}^3\mathbf{PC}_{pF}$ | 1.58         | 0.40 | 0.01  | 0.00  | 0.00 | 0.01  | 1.09   | -1.19 | -0.13 | -0.76 | 0.28 | 0.71  |

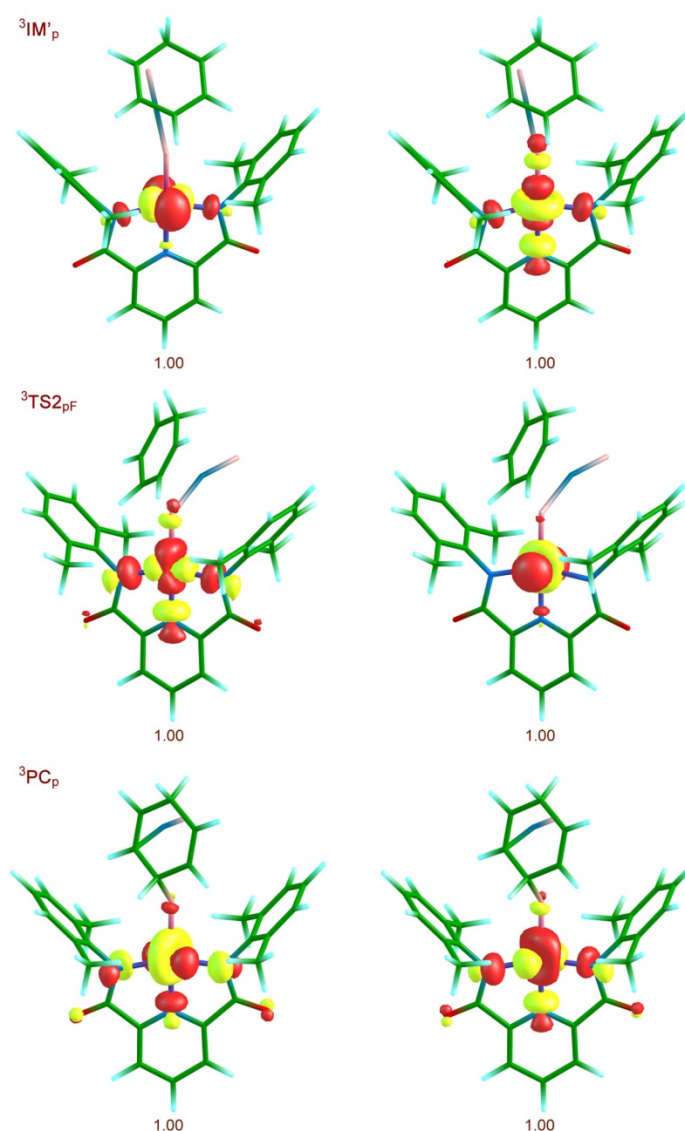

**Fig. S21** Singly-occupied natural orbitals (SNOs) of the reaction intermediates in halogenation of CHD-H radical by the proximal fluorine  $F_p$  of  $\mathbf{1}_{F-Ag-F}$  on the triplet spin state. Calculations were done at the UB3LYP/B2 level in solvent. Positive values represent alpha-electron occupations.

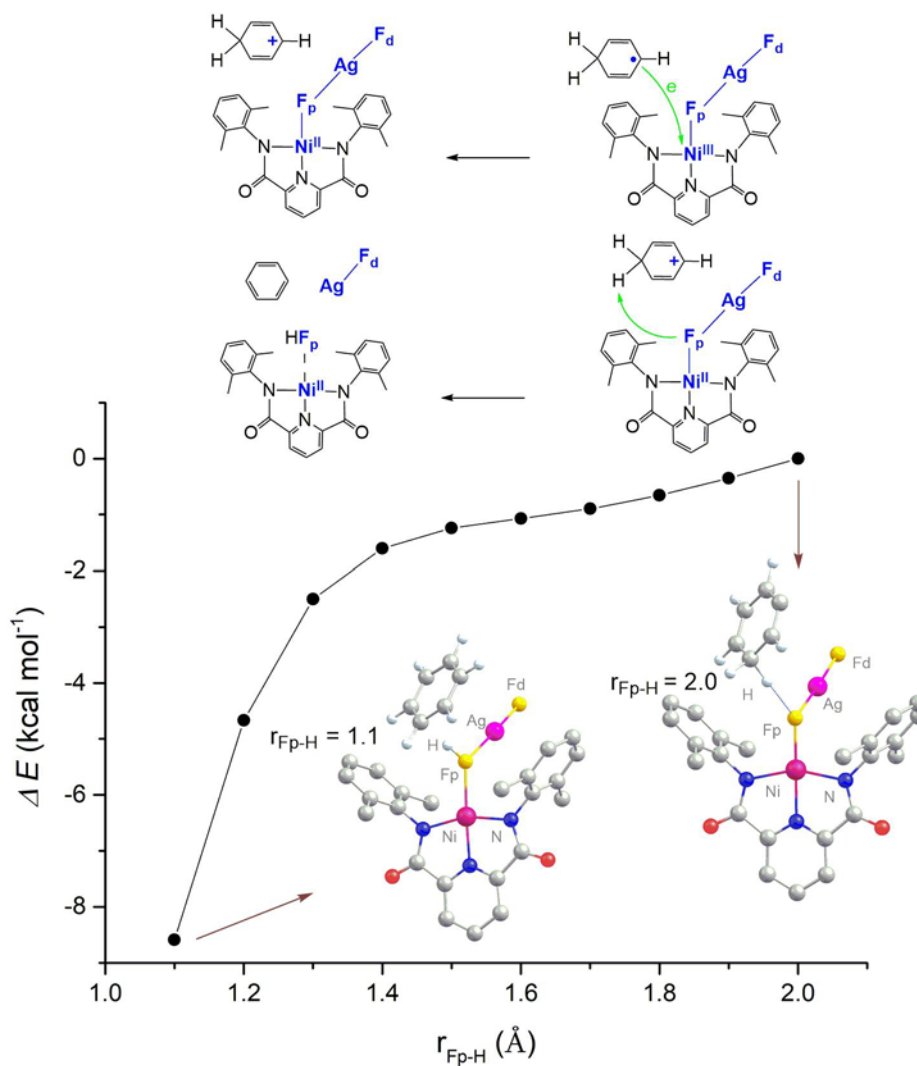

**Fig. S22** The energy plot of the relaxed scan alongside of the  $\text{F}_p\text{-H}$  distance for desaturation of CHD-H radical by the proximal fluorine  $\text{F}_p$  of  $\mathbf{1}_{\text{F-Ag-F}}$  on the triplet spin state. Calculations were done at the UB3LYP/B2 level in solvent. Energies are in  $\text{kcal mol}^{-1}$ .

## Part VI: C-H bond activation of CHD by the distal fluorine of $1_{F-Ag-F}$

**Table S22.** Various SCF and free energies of the reaction intermediates in C-H bond activation of CHD by the distal fluorine  $F_d$  of  $1_{F-Ag-F}$  on different spin states. Calculations were done at the UB3LYP/B2 level in solvent.

|             | OPT/B2                    | $\Delta E$ | OPT +ZPE     | $\Delta E$ | G            | $\Delta G$ |
|-------------|---------------------------|------------|--------------|------------|--------------|------------|
| $^2RC_d$    | -3291.320815 <sup>a</sup> | 0.0        | -3290.802918 | 0.0        | -3290.862326 | 0.0        |
| $^4RC_d$    | -3291.302833              | 11.3       | -3290.786596 | 10.2       | -3290.845888 | 10.3       |
| $^2TS_{dH}$ | -3291.303647              | 10.8       | -3290.791828 | 7.0        | -3290.846643 | 9.8        |
| $^4TS_{dH}$ | -3291.290354              | 19.1       | -3290.778076 | 15.6       | -3290.832194 | 18.9       |
| $^2IM_d$    | -3291.330423              | -6.0       | -3290.815641 | -8.0       | -3290.872063 | -6.1       |
| $^4IM_d$    | -3291.319336              | 0.9        | -3290.805998 | -1.9       | -3290.862714 | -0.2       |

a. Absolute energies are in au units and the relative ones are in kcal mol<sup>-1</sup> units.

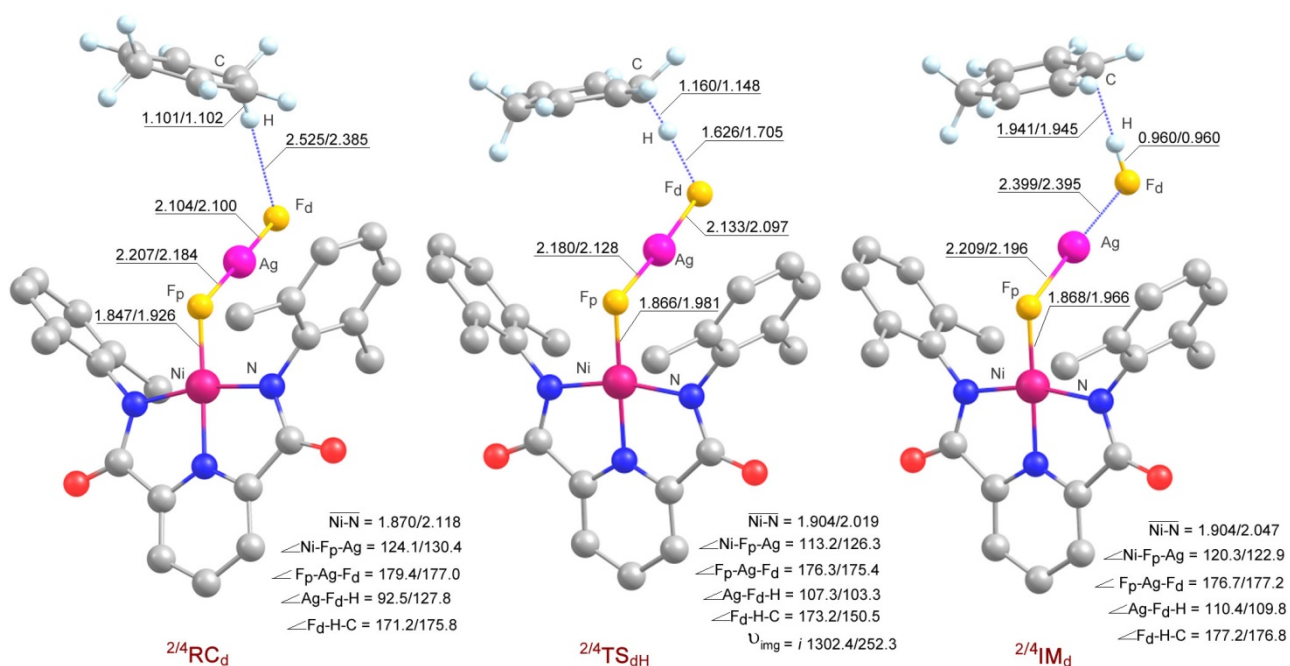

**Fig. S23** The optimized structures of the reaction intermediates in C-H bond activation of CHD by the distal fluorine  $F_d$  of  $1_{F-Ag-F}$  on different spin states. Calculations were done at the UB3LYP/B2 level in solvent. Lengths are in Å units, bond angles are in degree units and imaginary frequencies are in cm<sup>-1</sup> units. Hydrogen atoms of the ligand are omitted for clarity.

**Table S23.** Mulliken spin densities and charges of the reaction intermediates in C-H bond activation of CHD by the distal fluorine F<sub>d</sub> of **1**<sub>F-Ag-F</sub> on different spin states. Calculations were done at the UB3LYP/B2 level in solvent.

|                                      | Spin density |      |                |                |      |      |       | Charge |       |                |                |      |      |       |
|--------------------------------------|--------------|------|----------------|----------------|------|------|-------|--------|-------|----------------|----------------|------|------|-------|
|                                      | Ni           | L    | F <sub>p</sub> | F <sub>d</sub> | Ag   | H    | Sub-H | Ni     | L     | F <sub>p</sub> | F <sub>d</sub> | Ag   | H    | Sub-H |
| <sup>2</sup> <b>RC</b> <sub>d</sub>  | 0.74         | 0.27 | -0.01          | 0.00           | 0.00 | 0.00 | 0.00  | 0.99   | -0.41 | -0.40          | -0.72          | 0.56 | 0.19 | -0.20 |
| <sup>4</sup> <b>RC</b> <sub>d</sub>  | 1.80         | 1.17 | 0.03           | 0.00           | 0.00 | 0.00 | 0.00  | 1.15   | -0.44 | -0.54          | -0.72          | 0.57 | 0.20 | -0.22 |
| <sup>2</sup> <b>TS</b> <sub>dH</sub> | 0.07         | 0.22 | 0.01           | 0.06           | 0.01 | 0.06 | 0.57  | 0.52   | -0.53 | -0.46          | -0.62          | 0.58 | 0.29 | 0.22  |
| <sup>4</sup> <b>TS</b> <sub>dH</sub> | 1.64         | 0.35 | 0.06           | 0.10           | 0.17 | 0.06 | 0.63  | 1.05   | -1.26 | -0.48          | -0.59          | 0.54 | 0.28 | 0.45  |
| <sup>2</sup> <b>IM</b> <sub>d</sub>  | 0.00         | 0.00 | 0.00           | 0.00           | 0.00 | 0.03 | 0.97  | 0.56   | -0.92 | -0.45          | -0.40          | 0.75 | 0.42 | 0.03  |
| <sup>4</sup> <b>IM</b> <sub>d</sub>  | 1.78         | 0.19 | 0.03           | 0.00           | 0.01 | 0.04 | 0.97  | 1.24   | -1.51 | -0.55          | -0.40          | 0.75 | 0.42 | 0.04  |



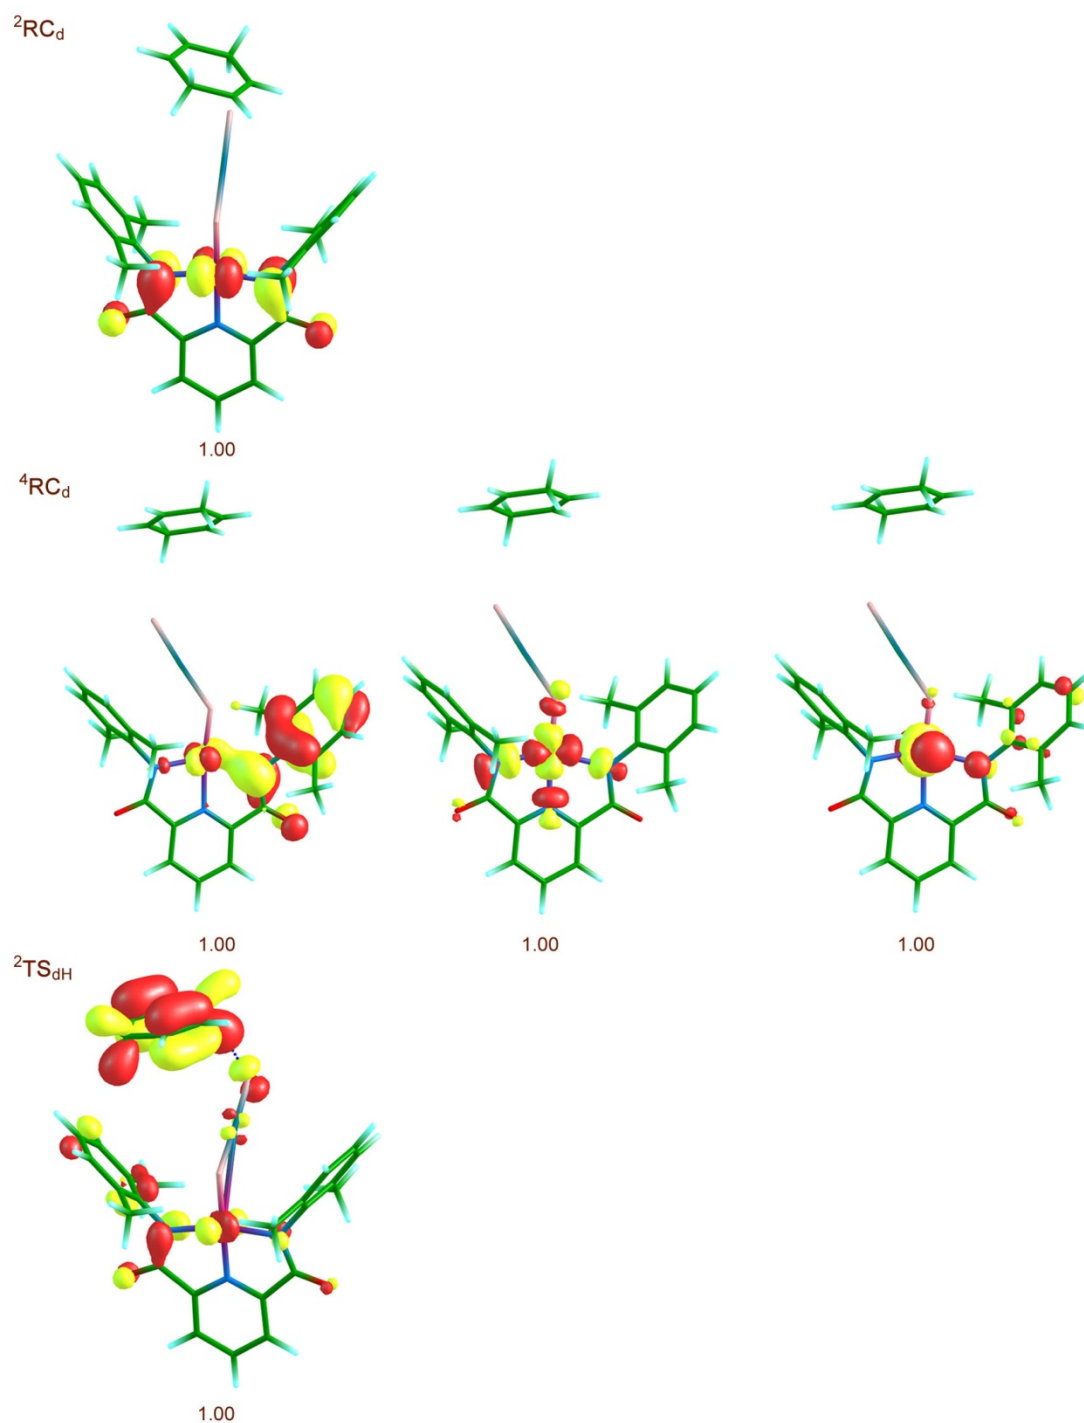

**Fig. S24** Singly-occupied natural orbitals (SNOs) of complex the reaction intermediates in C-H bond activation of CHD by the distal fluorine  $F_d$  of  $1_{F-Ag-F}$  on different spin states. Calculations were done at the UB3LYP/B2 level in solvent. Positive values represent alpha-electron occupations. (To be continued.)

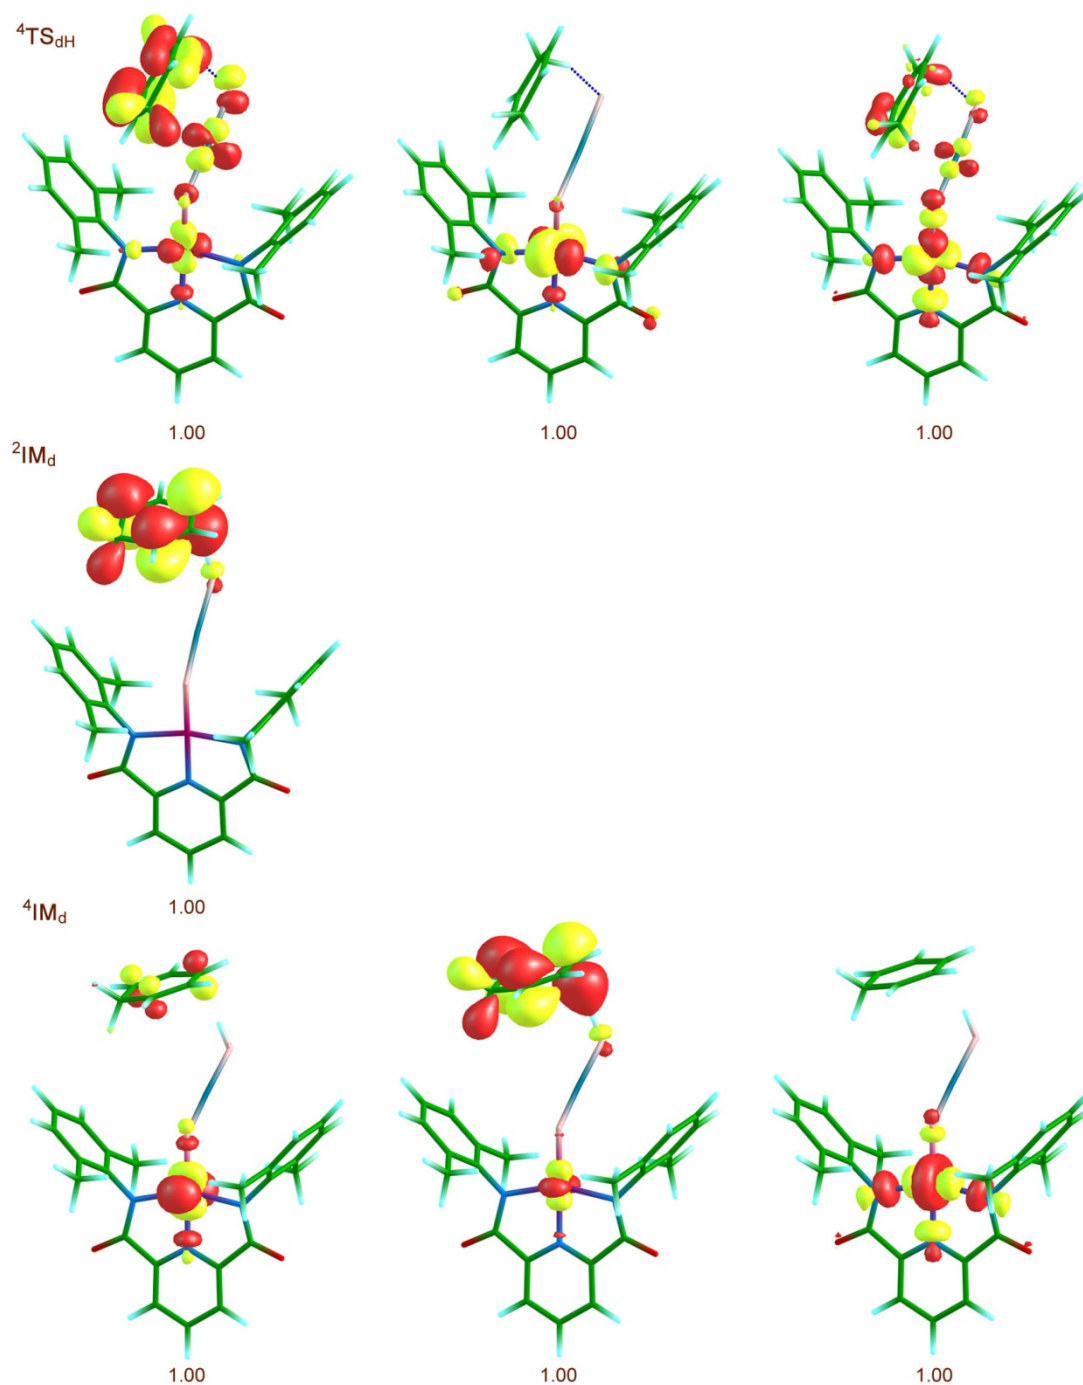

**Fig. S24** Singly-occupied natural orbitals (SNOs) of complex the reaction intermediates in C-H bond activation of CHD by the distal fluorine  $F_d$  of  $1_{F-Ag-F}$  on different spin states. Calculations were done at the UB3LYP/B2 level in solvent. Positive values represent alpha-electron occupations.

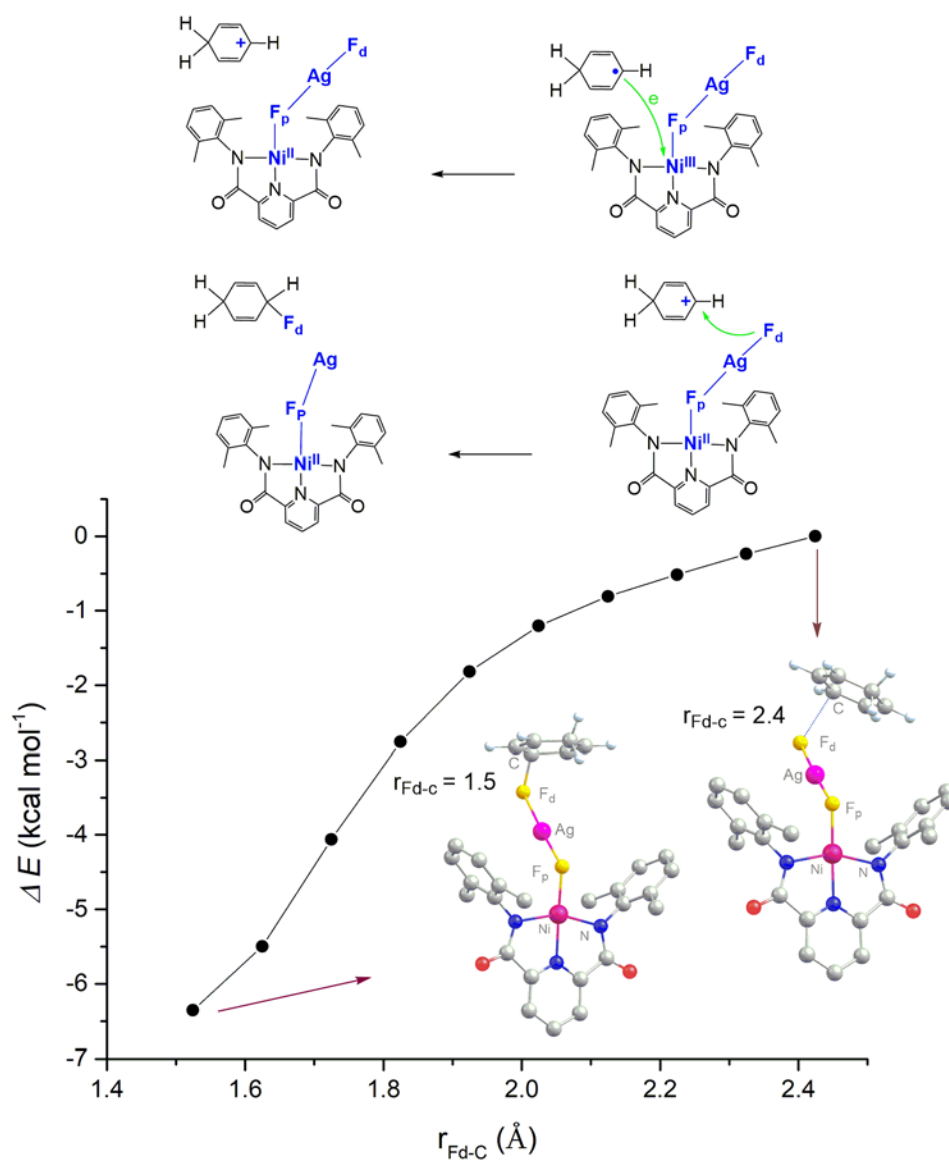

**Fig. S25** The energy plot of the relaxed scan alongside of the  $F_d$ -C distance for halogenation of CHD-H radical by the distal fluorine  $F_d$  of  $1_{\text{F-Ag-F}}$  on the triplet spin state. Lengths are in  $\text{\AA}$  units. Energies are in  $\text{kcal mol}^{-1}$ . Calculations were done at the UB3LYP/B2 level in solvent.

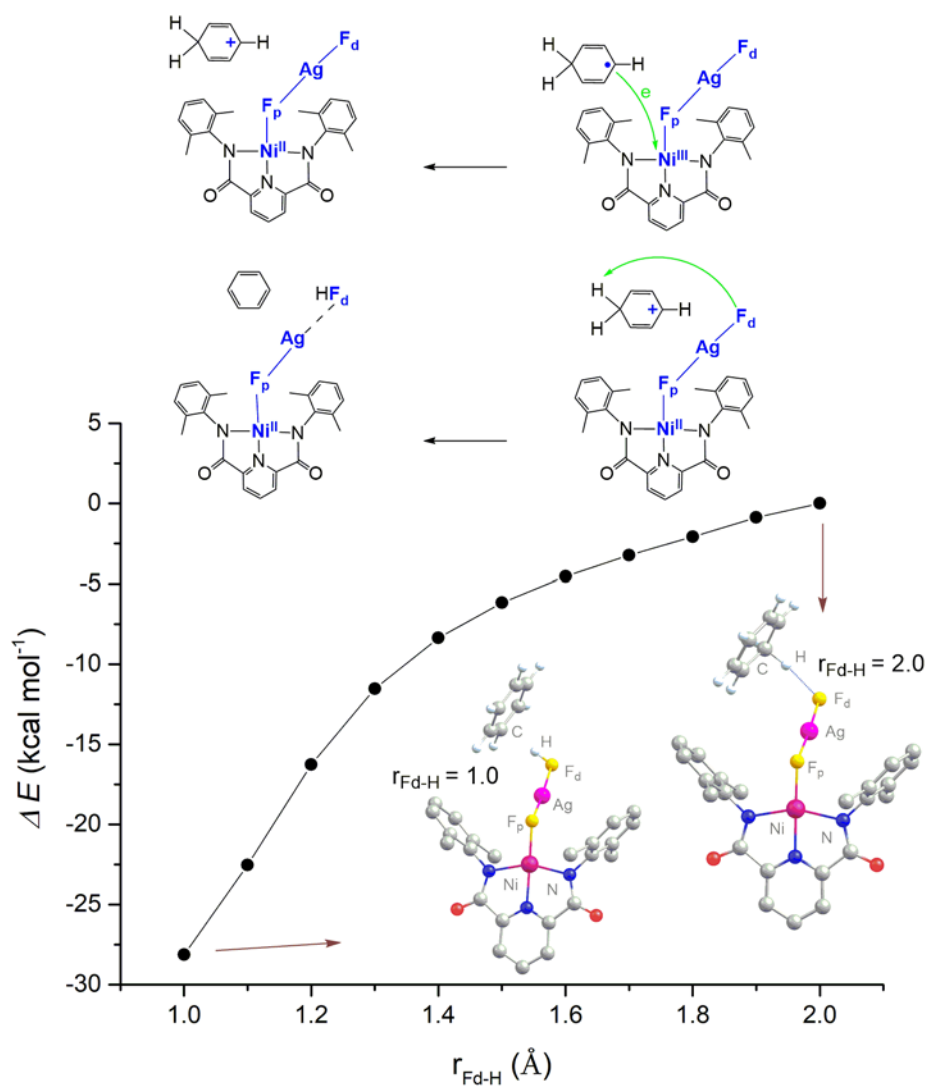

**Fig. S26** The energy plot of the relaxed scan alongside of the  $\text{F}_d\text{-H}$  distance for desaturation of  $\text{CHD-H}$  radical by the distal fluorine  $\text{F}_d$  of  $\mathbf{1}_{\text{F-Ag-F}}$  on the triplet spin state. Lengths are in  $\text{\AA}$  units. Energies are in  $\text{kcal mol}^{-1}$ . Calculations were done at the UB3LYP/B2 level in solvent.

## Part VII: Difluorination of PPh<sub>3</sub> by two separated 1<sub>F</sub>S

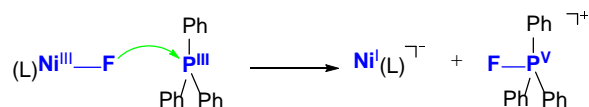

**Table S24.** Various SCF and free energies of the reaction intermediates in the first fluorination of PPh<sub>3</sub> by 1<sub>F</sub>. Calculations were done at the UB3LYP/B2 level in solvent.

|                                | OPT/B2                    | $\Delta E$ | OPT +ZPE     | $\Delta E$ | G            | $\Delta G$ |
|--------------------------------|---------------------------|------------|--------------|------------|--------------|------------|
| <sup>2</sup> RC <sub>PF</sub>  | -3848.549523 <sup>a</sup> | 0.0        | -3847.882209 | 0.0        | -3847.947776 | 0.0        |
| <sup>4</sup> RC <sub>PF</sub>  | -3848.530335              | 12.0       | -3847.863734 | 11.6       | -3847.924101 | 14.9       |
| <sup>2</sup> TS <sub>1PF</sub> | -3848.503788              | 28.7       | -3847.835470 | 29.3       | -3847.890057 | 36.2       |
| <sup>4</sup> TS <sub>1PF</sub> | -3848.502630              | 29.4       | -3847.837327 | 28.2       | -3847.901648 | 28.9       |
| <sup>2</sup> IM <sub>1PF</sub> | -3848.540422              | 5.7        | -3847.872661 | 6.0        | -3847.934706 | 8.2        |
| <sup>4</sup> IM <sub>1PF</sub> | -3848.518692              | 19.3       | -3847.852603 | 18.6       | -3847.915817 | 20.1       |

a. Absolute energies are in au units and the relative ones are in kcal mol<sup>-1</sup> units.

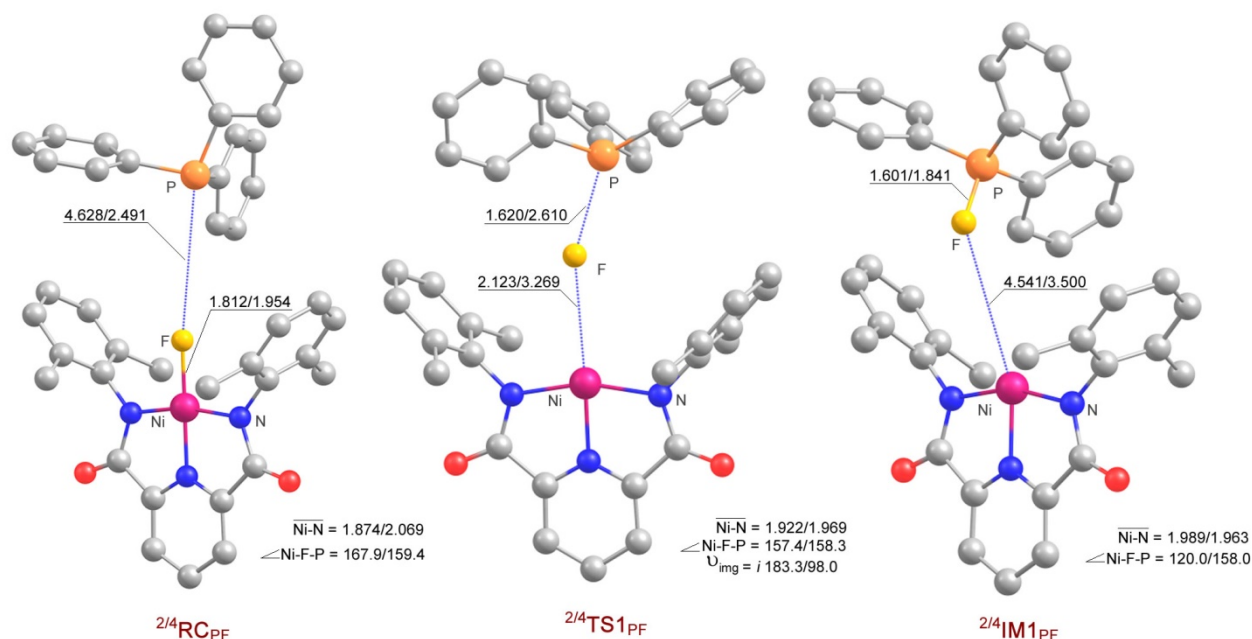

**Fig. S27** The optimized structures of the reaction intermediates in the first fluorination of PPh<sub>3</sub> by 1<sub>F</sub> on the doublet/quartet spin states. Calculations were done at the UB3LYP/B2 level in solvent. Lengths are in Å units, bond angles are in degree units and imaginary frequencies are in cm<sup>-1</sup> units. Hydrogen atoms are omitted for clarity.

**Table S25.** Mulliken charges and spin densities of the reaction intermediates *i* in the first fluorination of PPh<sub>3</sub> by **1<sub>F</sub>** on the doublet/quartet spin states. Calculations were done at the UB3LYP/B2 level in solvent.

|                                       | Spin density |      |       |      |       | Charge |       |       |       |       |
|---------------------------------------|--------------|------|-------|------|-------|--------|-------|-------|-------|-------|
|                                       | Ni           | L    | F     | P    | Sub-P | Ni     | L     | F     | P     | Sub-P |
| <sup>2</sup> <b>RC</b> <sub>PF</sub>  | 0.76         | 0.25 | -0.01 | 0.00 | 0.00  | 0.96   | -0.51 | -0.40 | -0.56 | 0.51  |
| <sup>4</sup> <b>RC</b> <sub>PF</sub>  | 1.80         | 0.18 | 0.07  | 0.83 | 0.13  | 1.19   | -1.32 | -0.45 | -0.20 | 0.77  |
| <sup>2</sup> <b>TS1</b> <sub>PF</sub> | 0.06         | 0.00 | -0.11 | 0.84 | 0.21  | 0.32   | -0.44 | 0.06  | -0.46 | 0.52  |
| <sup>4</sup> <b>TS1</b> <sub>PF</sub> | 1.58         | 0.42 | 0.15  | 0.72 | 0.14  | 1.09   | -1.07 | -0.65 | -0.14 | 0.77  |
| <sup>2</sup> <b>IM1</b> <sub>PF</sub> | 0.82         | 0.14 | 0.00  | 0.01 | 0.02  | 0.28   | -1.22 | -0.23 | 0.06  | 1.11  |
| <sup>4</sup> <b>IM1</b> <sub>PF</sub> | 1.56         | 0.44 | 0.05  | 0.82 | 0.13  | 1.07   | -1.03 | -0.35 | -0.53 | 0.84  |

**Table S26.** Energy variation of the conversion of the complex containing the Ni<sup>I</sup> and the Ni<sup>III</sup>-F species to the complex containing the Ni<sup>II</sup> and the Ni<sup>II</sup>-F species. Calculations were done at the UB3LYP/B2 level in solvent.

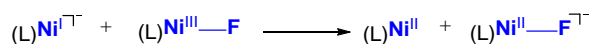

| (L)Ni <sup>I</sup> | (L)Ni <sup>III</sup> F | (L)Ni <sup>II</sup> | (L)Ni <sup>II</sup> F | ΔE <sup>a</sup> |
|--------------------|------------------------|---------------------|-----------------------|-----------------|
| -2712.099228       | -2811.815548           | -2711.965441        | -2812.006016          | -35.6           |

a.  $\Delta E = (E((\text{L})\text{Ni}^{\text{II}}) + E((\text{L})\text{Ni}^{\text{II}}-\text{F}) - (E((\text{L})\text{Ni}^{\text{III}}-\text{F}) + E((\text{L})\text{Ni}^{\text{I}})))$ . Absolute energies are in au units and the relative ones are in kcal mol<sup>-1</sup> units.

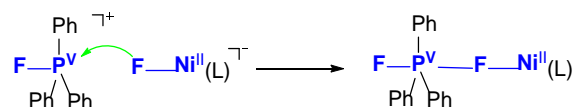

**Table S27.** Various SCF and free energies of the reaction intermediates in the second fluorination of the intermediate  $[FPPH_3]^+$  by 1e-reduced  $\mathbf{1}_F$  on the singlet/triplet spin states. Calculations were done at the UB3LYP/B2 level in solvent.

|                       | OPT/B2                    | $\Delta E$ | OPT +ZPE     | $\Delta E$ | G            | $\Delta G$ |
|-----------------------|---------------------------|------------|--------------|------------|--------------|------------|
| $^1\mathbf{IM}'_{PF}$ | -3948.452013 <sup>a</sup> | 0.0        | -3947.780401 | 0.0        | -3947.842734 | 0.0        |
| $^3\mathbf{IM}'_{PF}$ | -3948.437640              | 9.0        | -3947.767300 | 8.2        | -3947.828070 | 9.2        |
| $^1\mathbf{TS2}_{PF}$ | -3948.430580              | 13.4       | -3947.757660 | 14.3       | -3947.812094 | 19.2       |
| $^3\mathbf{TS2}_{PF}$ | -3948.428576              | 14.7       | -3947.757006 | 14.7       | -3947.813988 | 18.0       |
| $^1\mathbf{IM2}_{PF}$ | -3948.432154              | 12.5       | -3947.758934 | 13.5       | -3947.814023 | 18.0       |
| $^3\mathbf{IM2}_{PF}$ | -3948.436457              | 9.8        | -3947.764098 | 10.2       | -3947.820959 | 13.7       |

a. Absolute energies are in au units and the relative ones are in kcal mol<sup>-1</sup> units.

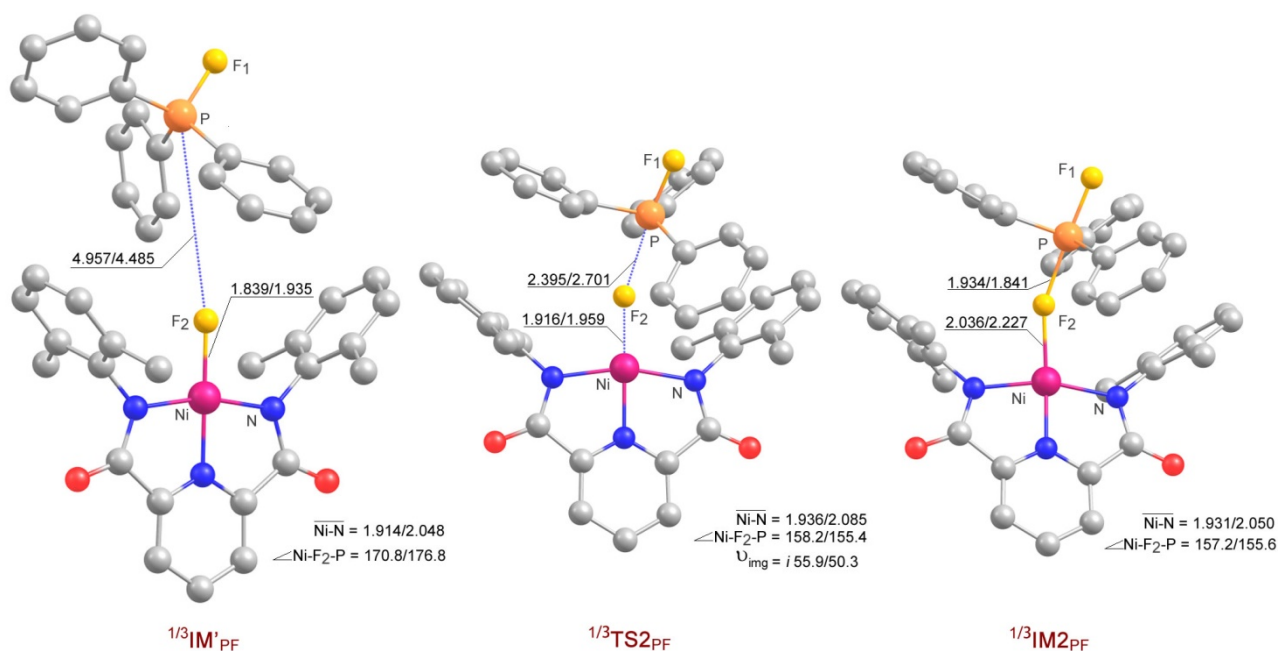

**Fig. S28** The optimized structures of the reaction intermediates in the second fluorination of the intermediate  $[FPPH_3]^+$  by 1e-reduced  $\mathbf{1}_F$  on the singlet/triplet spin states. Calculations were done at the UB3LYP/B2 level in solvent. Lengths are in Å units, bond angles are in degree units and imaginary frequencies are in cm<sup>-1</sup> units. Hydrogen atoms of the ligand are omitted for clarity.

**Table S28.** Mulliken charges and spin densities of the reaction intermediates in the second fluorination of the intermediate  $[\text{FPPh}_3]^+$  by 1e-reduced  $\mathbf{1}_F$  on the singlet/triplet spin states. Calculations were done at the UB3LYP/B2 level in solvent.

|                            | Spin density |      |                |                |      |       | Charge |      |                |                |      |       |
|----------------------------|--------------|------|----------------|----------------|------|-------|--------|------|----------------|----------------|------|-------|
|                            | Ni           | L    | F <sub>1</sub> | F <sub>2</sub> | P    | Sub-P | Ni     | L    | F <sub>1</sub> | F <sub>2</sub> | P    | Sub-P |
| $^1\text{IM}'_{\text{PF}}$ | 0.00         | 0.00 | 0.00           | 0.00           | 0.00 | 0.00  | -0.24  | 1.68 | -0.67          | 0.16           | 0.16 | -1.10 |
| $^3\text{IM}'_{\text{PF}}$ | 0.00         | 1.88 | 0.00           | 0.00           | 0.00 | 0.11  | -0.27  | 1.78 | -0.68          | 0.16           | 0.16 | -1.15 |
| $^1\text{TS2}_{\text{PF}}$ | 0.00         | 0.00 | 0.00           | 0.00           | 0.00 | 0.00  | -0.35  | 1.29 | -0.64          | 0.17           | 0.14 | -0.61 |
| $^3\text{TS2}_{\text{PF}}$ | 0.00         | 1.98 | 0.00           | 0.00           | 0.00 | 0.02  | -0.31  | 1.72 | -0.65          | 0.17           | 0.14 | -1.08 |
| $^1\text{IM2}_{\text{PF}}$ | 0.00         | 0.00 | 0.00           | 0.00           | 0.00 | 0.00  | -0.43  | 1.33 | -0.69          | 0.17           | 0.14 | -0.53 |
| $^3\text{IM2}_{\text{PF}}$ | 0.00         | 2.01 | 0.00           | 0.00           | 0.00 | -0.01 | -0.44  | 1.42 | -0.65          | 0.17           | 0.14 | -0.64 |

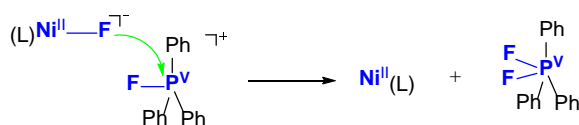

**Table S29.** Various SCF and free energies of the reaction intermediates in the second fluorination to form a *cis*-F<sub>2</sub>PPh<sub>3</sub> product on the singlet/triplet spin states. Calculations were done at the UB3LYP/B2 level in solvent.

|                                | OPT/B2                    | $\Delta E$ | OPT +ZPE     | $\Delta E$ | G            | $\Delta G$ |
|--------------------------------|---------------------------|------------|--------------|------------|--------------|------------|
| $^1\text{IM}'_{\text{PF-cis}}$ | -3948.452957 <sup>a</sup> | 0.0        | -3947.781379 | 0.0        | -3947.844051 | 0.0        |
| $^3\text{IM}'_{\text{PF-cis}}$ | -3948.441404              | 7.2        | -3947.771249 | 6.4        | -3947.834924 | 5.7        |
| $^1\text{TS2}_{\text{PF-cis}}$ | -3948.408485              | 27.9       | -3947.736459 | 28.2       | -3947.794563 | 31.1       |
| $^3\text{TS2}_{\text{PF-cis}}$ | -3948.414866              | 23.9       | -3947.743406 | 23.8       | -3947.802043 | 26.4       |
| $^1\text{IM2}_{\text{PF-cis}}$ | -3948.412291              | 25.5       | -3947.741030 | 25.3       | -3947.802149 | 26.3       |
| $^3\text{IM2}_{\text{PF-cis}}$ | -3948.417002              | 22.6       | -3947.746414 | 21.9       | -3947.809381 | 21.8       |

a. Absolute energies are in au units and the relative ones are in kcal mol<sup>-1</sup> units.



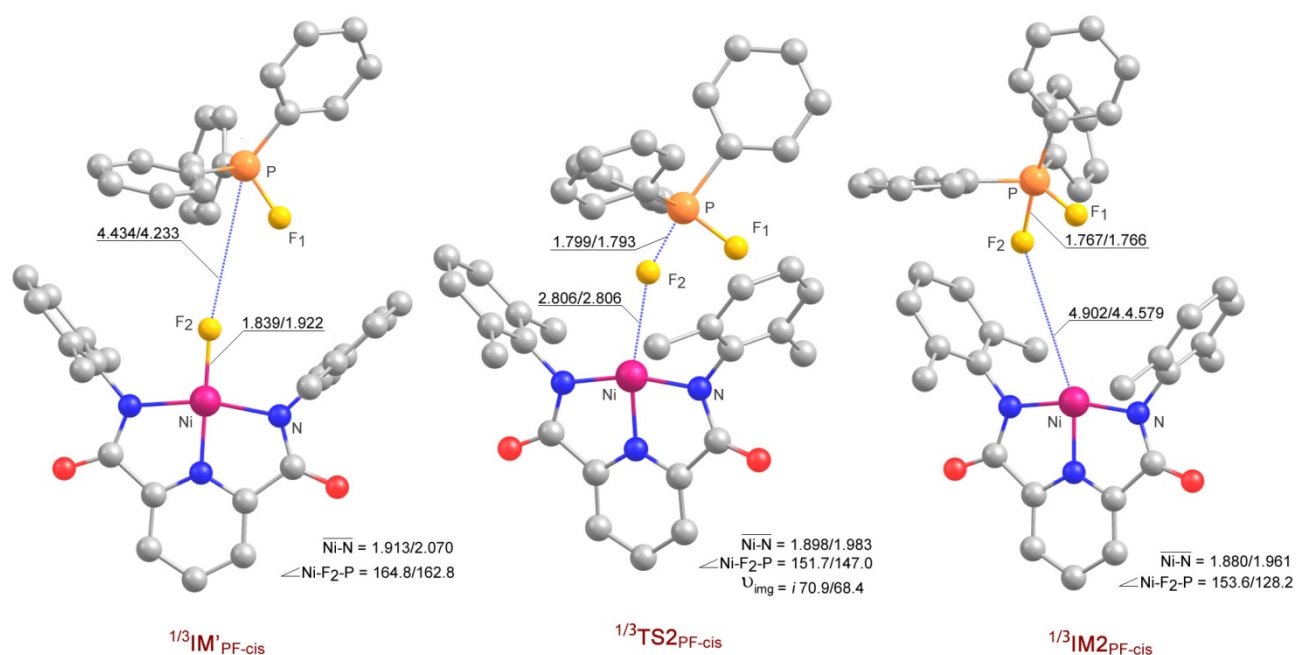

**Fig. S29** The optimized structures of the reaction intermediates in the second fluorination to form a *cis*-F<sub>2</sub>PPh<sub>3</sub> product on the singlet/triplet spin states. Calculations were done at the UB3LYP/B2 level in solvent. Lengths are in Å units, bond angles are in degree units and imaginary frequencies are in cm<sup>-1</sup> units. Hydrogen atoms of the ligand are omitted for clarity.

**Table S30.** Mulliken charges and spin densities of the reaction intermediates in the second fluorination to form a *cis*-F<sub>2</sub>PPh<sub>3</sub> product on the singlet/triplet spin states. Calculations were done at the UB3LYP/B2 level in solvent.

|                        | Spin density |      |                |                |      |       | Charge |       |                |                |       |       |
|------------------------|--------------|------|----------------|----------------|------|-------|--------|-------|----------------|----------------|-------|-------|
|                        | Ni           | L    | F <sub>1</sub> | F <sub>2</sub> | P    | Sub-P | Ni     | L     | F <sub>1</sub> | F <sub>2</sub> | P     | Sub-P |
| <sup>1</sup> IM'PF-cis | 0.00         | 0.00 | 0.00           | 0.00           | 0.00 | 0.00  | 0.53   | -1.02 | -0.44          | -0.18          | -0.25 | 1.36  |
| <sup>3</sup> IM'PF-cis | 1.80         | 0.17 | 0.04           | 0.00           | 0.00 | 0.00  | 1.18   | -1.51 | -0.59          | -0.20          | -0.06 | 1.18  |
| <sup>1</sup> TS2PF-cis | 0.00         | 0.00 | 0.00           | 0.00           | 0.00 | 0.00  | 0.65   | -0.58 | -0.40          | -0.26          | -0.21 | 0.81  |
| <sup>3</sup> TS2PF-cis | 1.58         | 0.41 | 0.00           | 0.00           | 0.02 | 0.00  | 1.07   | -1.02 | -0.44          | -0.25          | -0.09 | 0.73  |
| <sup>1</sup> IM2PF-cis | 0.00         | 0.00 | 0.00           | 0.00           | 0.00 | 0.00  | 0.55   | -0.53 | -0.44          | -0.30          | 0.09  | 0.63  |
| <sup>3</sup> IM2PF-cis | 1.55         | 0.44 | 0.00           | 0.00           | 0.00 | 0.00  | 1.03   | -1.01 | -0.41          | -0.27          | -0.09 | 0.75  |

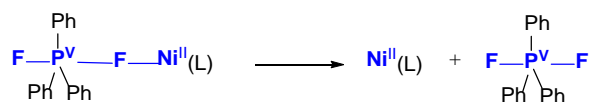

**Table S31.** Various SCF and free energies of the reaction intermediates of F<sub>2</sub>PPh<sub>3</sub> desorption from the nickel complex. Calculations were done at the UB3LYP/B2 level in solvent.

|                                 | OPT/B2                    | $\Delta E$ | OPT +ZPE     | $\Delta E$ | G            | $\Delta G$ |
|---------------------------------|---------------------------|------------|--------------|------------|--------------|------------|
| <sup>3</sup> IM <sub>2</sub> PF | -3948.436457 <sup>a</sup> | 0.0        | -3947.764098 | 0.0        | -3947.820959 | 0.0        |
| <sup>1</sup> IM <sub>2</sub> PF | -3948.432154              | 2.7        | -3947.758934 | 3.2        | -3947.814023 | 4.4        |
| <sup>1</sup> TS <sub>3</sub> PF | -3948.429478              | 4.4        | -3947.756287 | 4.9        | -3947.811647 | 5.8        |
| <sup>1</sup> PC <sub>PF</sub>   | -3948.442998              | -4.1       | -3947.771100 | -4.4       | -3947.835482 | -9.1       |
| <sup>3</sup> PC <sub>PF</sub>   | -3948.447580              | -7.0       | -3947.776769 | -8.0       | -3947.842573 | -13.6      |

a. Absolute energies are in au units and the relative ones are in kcal mol<sup>-1</sup> units.

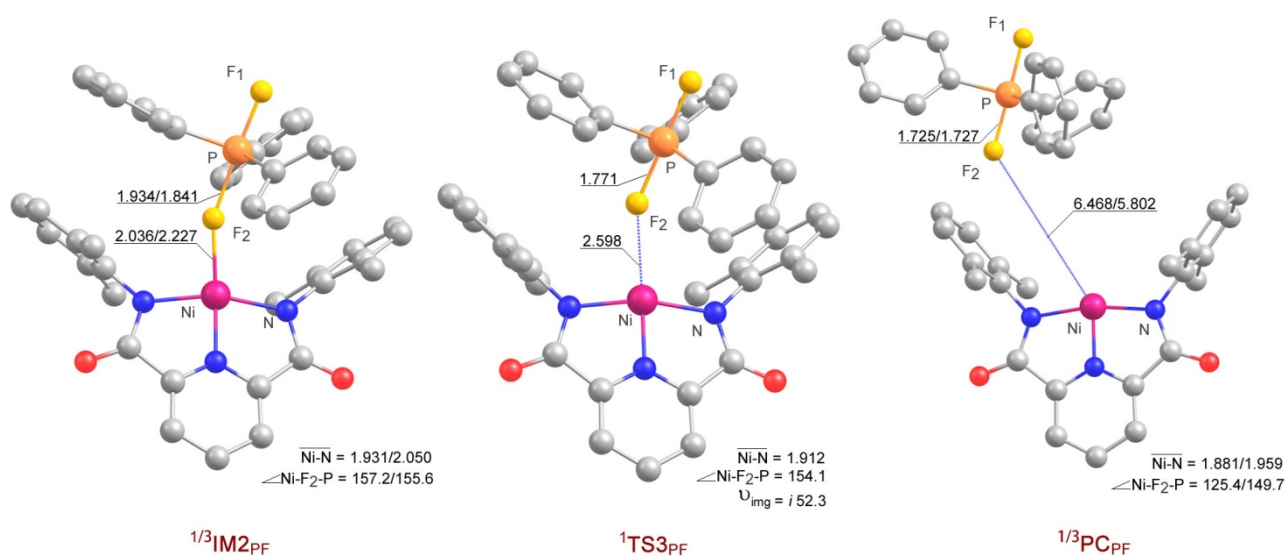

**Fig. S30** The optimized structures of the reaction intermediates of F<sub>2</sub>PPh<sub>3</sub> desorption from the nickel complex. Calculations were done at the UB3LYP/B2 level in solvent. Lengths are in Å units, bond angles are in degree units and imaginary frequencies are in cm<sup>-1</sup> units. Hydrogen atoms of the ligand are omitted for clarity.

**Table S32.** Mulliken charges and spin densities of the reaction intermediates of F<sub>2</sub>PPh<sub>3</sub> desorption from the nickel complex. Calculations were done at the UB3LYP/B2 level in solvent.

|                                       | Spin density |      |      |      |      |       | Charge |      |                      |      |      |       |
|---------------------------------------|--------------|------|------|------|------|-------|--------|------|----------------------|------|------|-------|
|                                       | Ni           | L    | F1   | F2   | P    | Sub-P | Ni     | L    | F1                   | F2   | P    | Sub-P |
| <sup>1</sup> <b>IM</b> <sub>2PF</sub> | 0.00         | 0.00 | 0.00 | 0.00 | 0.00 | 0.00  | -0.43  | 1.33 | <sup>-</sup><br>0.69 | 0.17 | 0.14 | -0.53 |
| <sup>3</sup> <b>IM</b> <sub>2PF</sub> | 0.00         | 2.01 | 0.00 | 0.00 | 0.00 | -0.01 | -0.44  | 1.42 | <sup>-</sup><br>0.65 | 0.17 | 0.14 | -0.64 |
| <sup>1</sup> <b>TS</b> <sub>3PF</sub> | 0.00         | 0.00 | 0.00 | 0.00 | 0.00 | 0.00  | -0.46  | 1.43 | <sup>-</sup><br>0.60 | 0.18 | 0.15 | -0.69 |
| <sup>1</sup> <b>PC</b> <sub>PF</sub>  | 0.00         | 0.00 | 0.00 | 0.00 | 0.00 | 0.00  | -0.48  | 1.56 | <sup>-</sup><br>0.57 | 0.17 | 0.16 | -0.84 |
| <sup>3</sup> <b>PC</b> <sub>PF</sub>  | 0.00         | 1.87 | 0.02 | 0.00 | 0.00 | 0.11  | -0.47  | 1.89 | <sup>-</sup><br>0.72 | 0.16 | 0.16 | -1.02 |

## Part VIII: Difluorination of PPh<sub>3</sub> by the cooperation of two 1<sub>F</sub>S

**Table S33.** Energy comparison of the complex of 2 Ni(III)-F oxidants plus PPh<sub>3</sub> and the reagent complex (RC) with one 1<sub>F</sub>, one Ni(II)-F complex and an 1e-oxidized species (PPh<sub>3</sub>)<sup>•+</sup>. Calculations were done at the UB3LYP/B2//B1 level in solvent.

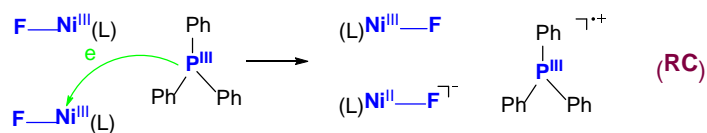

| 2(L)Ni <sup>III</sup> F + P <sup>III</sup> Ph <sub>3</sub> | RC           | ΔE <sup>a</sup> |
|------------------------------------------------------------|--------------|-----------------|
| -6660.728374                                               | -6660.742755 | -9.0            |

a. ΔE = E(RC) - [E(2Ni<sup>III</sup>F(L)) + E(PPh<sub>3</sub>)]. Absolute energies are in au units and the relative ones are in kcal mol<sup>-1</sup> units.

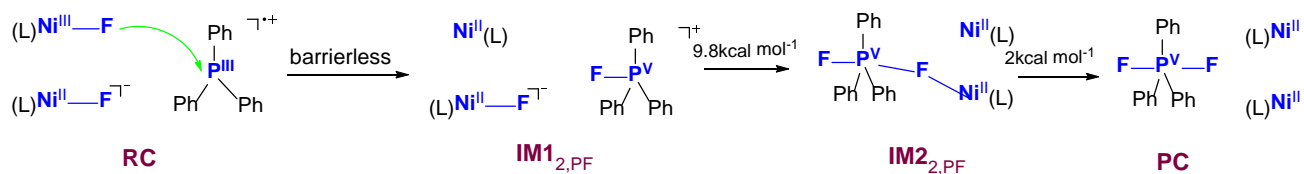

**Table S34.** Various SCF and free energies of the reaction intermediates of difluorination of PPh<sub>3</sub> by the cooperation of two 1<sub>F</sub>s. Calculations were done at the UB3LYP/B2//B1 level in solvent.

|                                   | OPT/B1                    | ΔE    | OPT +ZPE     | ΔE    | SPE/B2       | ΔE    | SPE+ZPE      | ΔE    | G            | ΔG    |
|-----------------------------------|---------------------------|-------|--------------|-------|--------------|-------|--------------|-------|--------------|-------|
| <sup>3</sup> RC <sub>2,PF</sub>   | -6660.609047 <sup>a</sup> | 0.0   | -6659.541893 | 0.0   | -6660.742755 | 0.0   | -6659.675601 | 0.0   | -6659.624998 | 0.0   |
| <sup>1</sup> RC <sub>2,PF</sub>   | -6660.609046              | 0.0   | -6659.541890 | 0.0   | -6660.742729 | 0.0   | -6659.675573 | 0.0   | -6659.624168 | 0.5   |
| <sup>3</sup> TS <sub>2,PF</sub>   | -6660.603157              | 3.7   | -6659.537026 | 3.1   | -6660.735888 | 4.3   | -6659.669757 | 3.7   | -6659.618724 | 3.9   |
| <sup>1</sup> IM1 <sub>2,PF</sub>  | -6660.661345              | -32.8 | -6659.592741 | -31.9 | -6660.797042 | -34.1 | -6659.728438 | -33.2 | -6659.676303 | -32.2 |
| <sup>3</sup> IM1 <sub>2,PF</sub>  | -6660.666293              | -35.9 | -6659.598513 | -35.5 | -6660.801494 | -36.9 | -6659.733714 | -36.5 | -6659.683296 | -36.6 |
| <sup>1</sup> IM1' <sub>2,PF</sub> | -6660.661601              | -33.0 | -6659.592917 | -32.0 | -6660.795612 | -33.2 | -6659.726928 | -32.2 | -6659.676885 | -32.6 |
| <sup>3</sup> IM1' <sub>2,PF</sub> | -6660.666141              | -35.8 | -6659.598289 | -35.4 | -6660.799970 | -35.9 | -6659.732118 | -35.5 | -6659.682313 | -36.0 |
| <sup>1</sup> TS2 <sub>2,PF</sub>  | -6660.650274              | -25.9 | -6659.581318 | -24.7 | -6660.780547 | -23.7 | -6659.711592 | -22.6 | -6659.662316 | -23.4 |
| <sup>3</sup> TS2 <sub>2,PF</sub>  | -6660.654229              | -28.4 | -6659.586427 | -27.9 | -6660.784378 | -26.1 | -6659.716576 | -25.7 | -6659.668597 | -27.4 |
| <sup>1</sup> IM2 <sub>2,PF</sub>  | -6660.653418              | -27.8 | -6659.584140 | -26.5 | -6660.781587 | -24.4 | -6659.712308 | -23.0 | -6659.664908 | -25.0 |
| <sup>3</sup> IM2 <sub>2,PF</sub>  | -6660.658045              | -30.7 | -6659.590080 | -30.2 | -6660.786337 | -27.3 | -6659.718372 | -26.8 | -6659.673293 | -30.3 |
| <sup>1</sup> TS3 <sub>2,PF</sub>  | -6660.647967              | -24.4 | -6659.579110 | -23.4 | -6660.778900 | -22.7 | -6659.710042 | -21.6 | -6659.661512 | -22.9 |
| <sup>3</sup> TS3 <sub>2,PF</sub>  | -6660.6525761             | -27.3 | -6659.584481 | -26.7 | -6660.783183 | -25.4 | -6659.715088 | -24.8 | -6659.667299 | -26.5 |
| <sup>1</sup> PC <sub>2,PF</sub>   | -6660.656243              | -29.6 | -6659.586757 | -28.2 | -6660.789835 | -29.5 | -6659.720349 | -28.1 | -6659.672506 | -29.8 |
| <sup>3</sup> PC <sub>2,PF</sub>   | -6660.664449              | -34.8 | -6659.596024 | -34.0 | -6660.797866 | -34.6 | -6659.729441 | -33.8 | -6659.683202 | -36.5 |

a. Absolute energies are in au units and the relative ones are in kcal mol<sup>-1</sup> units.

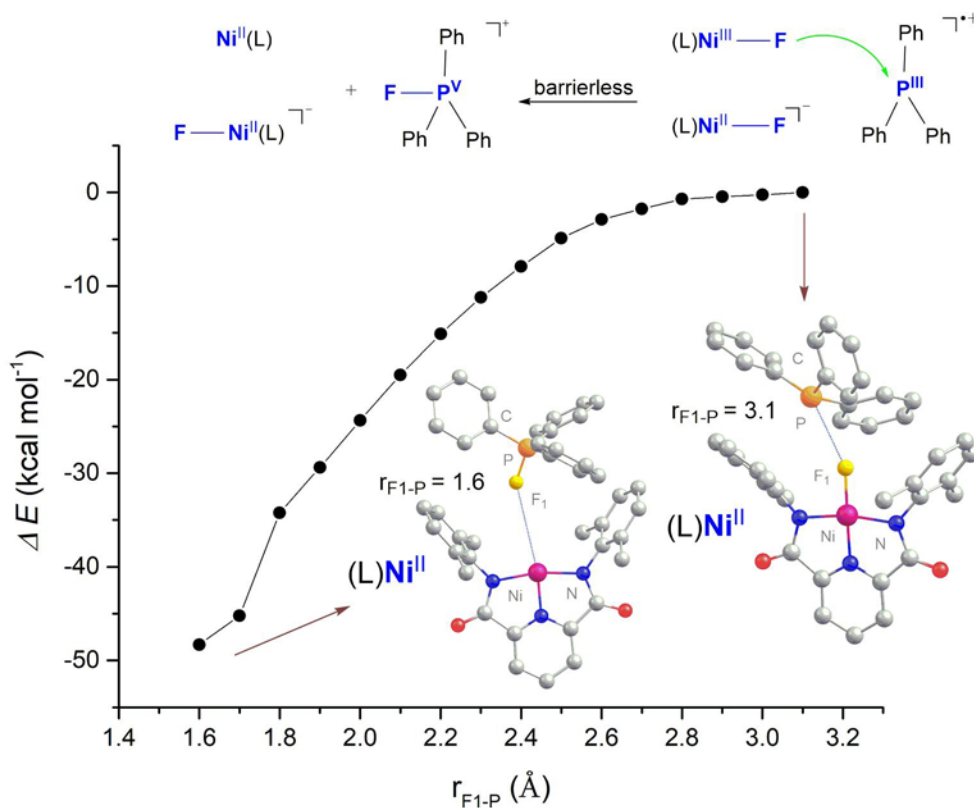

**Fig. S31** The energy plot of the relaxed scan alongside of the F-P distance on the singlet spin state for the first F-atom transfer from the Ni(III)-F dimer to PPh<sub>3</sub>. Lengths are in  $\text{\AA}$  units. Energies are in  $\text{kcal mol}^{-1}$ . Calculations were done at the UB3LYP/B1 level in solvent.

**Table S35.** Mulliken spin densities and charges of the reaction intermediates of difluorination of PPh<sub>3</sub> by the cooperation of two **1**F<sub>s</sub>. Calculations were done at the UB3LYP/B1 level in solvent.

|                                          | Spin density    |                |                |                 |                |                |      |       | Charge          |                |                |                 |                |                |      |       |
|------------------------------------------|-----------------|----------------|----------------|-----------------|----------------|----------------|------|-------|-----------------|----------------|----------------|-----------------|----------------|----------------|------|-------|
|                                          | Ni <sub>1</sub> | L <sub>1</sub> | F <sub>1</sub> | Ni <sub>2</sub> | L <sub>2</sub> | F <sub>2</sub> | P    | Sub-P | Ni <sub>1</sub> | L <sub>1</sub> | F <sub>1</sub> | Ni <sub>2</sub> | L <sub>2</sub> | F <sub>2</sub> | P    | Sub-P |
| <sup>1</sup> <b>RC</b> <sub>2,PF</sub>   | 0.01            | 0.18           | 0.00           | -0.69           | -0.32          | 0.01           | 0.50 | 0.31  | 0.60            | -0.86          | -0.50          | 0.86            | -0.34          | -0.46          | 0.53 | 0.18  |
| <sup>3</sup> <b>RC</b> <sub>2,PF</sub>   | 0.01            | 0.18           | 0.00           | 0.69            | 0.32           | -0.01          | 0.51 | 0.31  | 0.60            | -0.86          | -0.50          | 0.86            | -0.34          | -0.47          | 0.53 | 0.18  |
| <sup>3</sup> <b>TS</b> <sub>2,PF</sub>   | 1.02            | 0.21           | 0.01           | 0.00            | 0.00           | 0.00           | 0.54 | 0.23  | 0.86            | -0.35          | -0.40          | 0.58            | -1.02          | -0.49          | 0.63 | 0.19  |
| <sup>1</sup> <b>IM1</b> <sub>2,PF</sub>  | 0.00            | 0.00           | 0.00           | 0.00            | 0.00           | 0.00           | 0.00 | 0.00  | 0.74            | -0.72          | -0.31          | 0.58            | -1.02          | -0.49          | 0.93 | 0.30  |
| <sup>3</sup> <b>IM1</b> <sub>2,PF</sub>  | 1.64            | 0.36           | 0.00           | 0.00            | 0.00           | 0.00           | 0.00 | 0.00  | 0.86            | -0.84          | -0.31          | 0.58            | -1.02          | -0.49          | 0.93 | 0.30  |
| <sup>1</sup> <b>IM1'</b> <sub>2,PF</sub> | 0.00            | 0.00           | 0.00           | 0.00            | 0.00           | 0.00           | 0.00 | 0.00  | 0.74            | -0.78          | -0.31          | 0.59            | -0.95          | -0.49          | 0.93 | 0.27  |
| <sup>3</sup> <b>IM1'</b> <sub>2,PF</sub> | 1.64            | 0.36           | 0.00           | 0.00            | 0.00           | 0.00           | 0.00 | 0.00  | 0.87            | -0.90          | -0.31          | 0.59            | -0.95          | -0.49          | 0.93 | 0.27  |
| <sup>1</sup> <b>TS2</b> <sub>2,PF</sub>  | 0.00            | 0.00           | 0.00           | 0.00            | 0.00           | 0.00           | 0.00 | 0.00  | 0.74            | -0.79          | -0.35          | 0.61            | -0.88          | -0.48          | 0.96 | 0.19  |
| <sup>3</sup> <b>TS2</b> <sub>2,PF</sub>  | 1.64            | 0.36           | 0.00           | 0.00            | 0.00           | 0.00           | 0.00 | 0.00  | 0.87            | -0.91          | -0.35          | 0.61            | -0.89          | -0.48          | 0.96 | 0.19  |
| <sup>1</sup> <b>IM2</b> <sub>2,PF</sub>  | 0.00            | 0.00           | 0.00           | 0.00            | 0.00           | 0.00           | 0.00 | 0.00  | 0.74            | -0.78          | -0.41          | 0.63            | -0.80          | -0.47          | 1.06 | 0.01  |
| <sup>3</sup> <b>IM2</b> <sub>2,PF</sub>  | 1.64            | 0.36           | 0.00           | -0.01           | 0.01           | 0.00           | 0.00 | 0.00  | 0.87            | -0.90          | -0.41          | 0.65            | -0.81          | -0.47          | 1.06 | 0.01  |
| <sup>1</sup> <b>TS3</b> <sub>2,PF</sub>  | 0.00            | 0.00           | 0.00           | 0.00            | 0.00           | 0.00           | 0.00 | 0.00  | 0.74            | -0.78          | -0.44          | 0.70            | -0.75          | -0.45          | 1.08 | -0.10 |
| <sup>3</sup> <b>TS3</b> <sub>2,PF</sub>  | 1.64            | 0.36           | 0.00           | 0.00            | 0.00           | 0.00           | 0.00 | 0.00  | 0.87            | -0.90          | -0.44          | 0.69            | -0.75          | -0.45          | 1.08 | -0.10 |
| <sup>1</sup> <b>PC</b> <sub>2,PF</sub>   | 0.00            | 0.00           | 0.00           | 0.00            | 0.00           | 0.00           | 0.00 | 0.00  | 0.74            | -0.78          | -0.45          | 0.74            | -0.72          | -0.45          | 1.07 | -0.15 |
| <sup>3</sup> <b>PC</b> <sub>2,PF</sub>   | -0.01           | 0.01           | 0.00           | 1.64            | 0.35           | 0.00           | 0.00 | 0.00  | 0.81            | -0.85          | -0.45          | 0.86            | -0.85          | -0.45          | 1.06 | -0.14 |

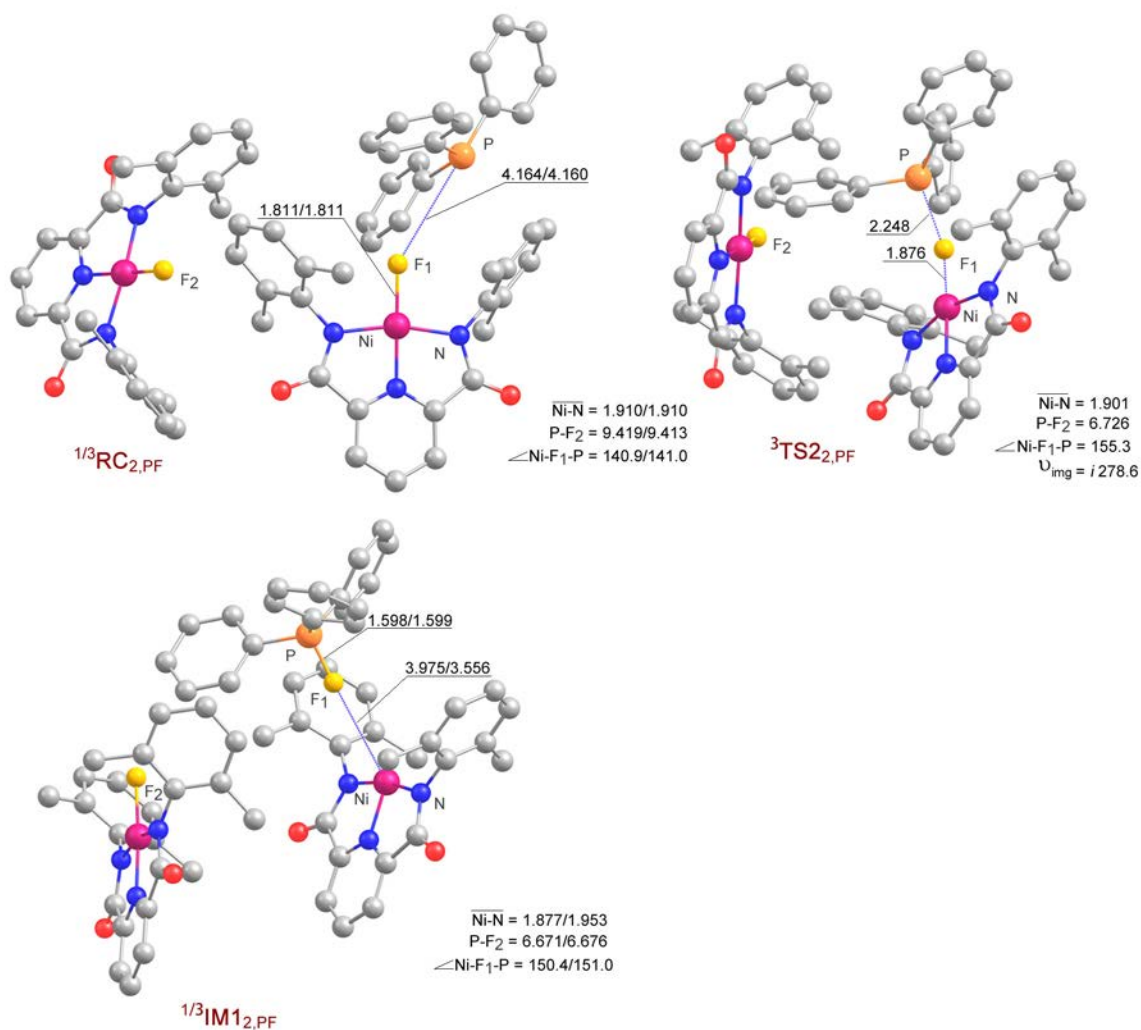

**Fig. S32** Optimized structures of the reaction intermediates of difluorination of PPh<sub>3</sub> by the cooperation of two **1**F<sub>s</sub> on the singlet/triplet spin states. Calculations were done at the UB3LYP/B1 level in solvent. Lengths are in Å units, bond angles are in degree units and imaginary frequencies are in cm<sup>-1</sup> units. Hydrogen atoms of the ligand are omitted for clarity. (To be continued.)



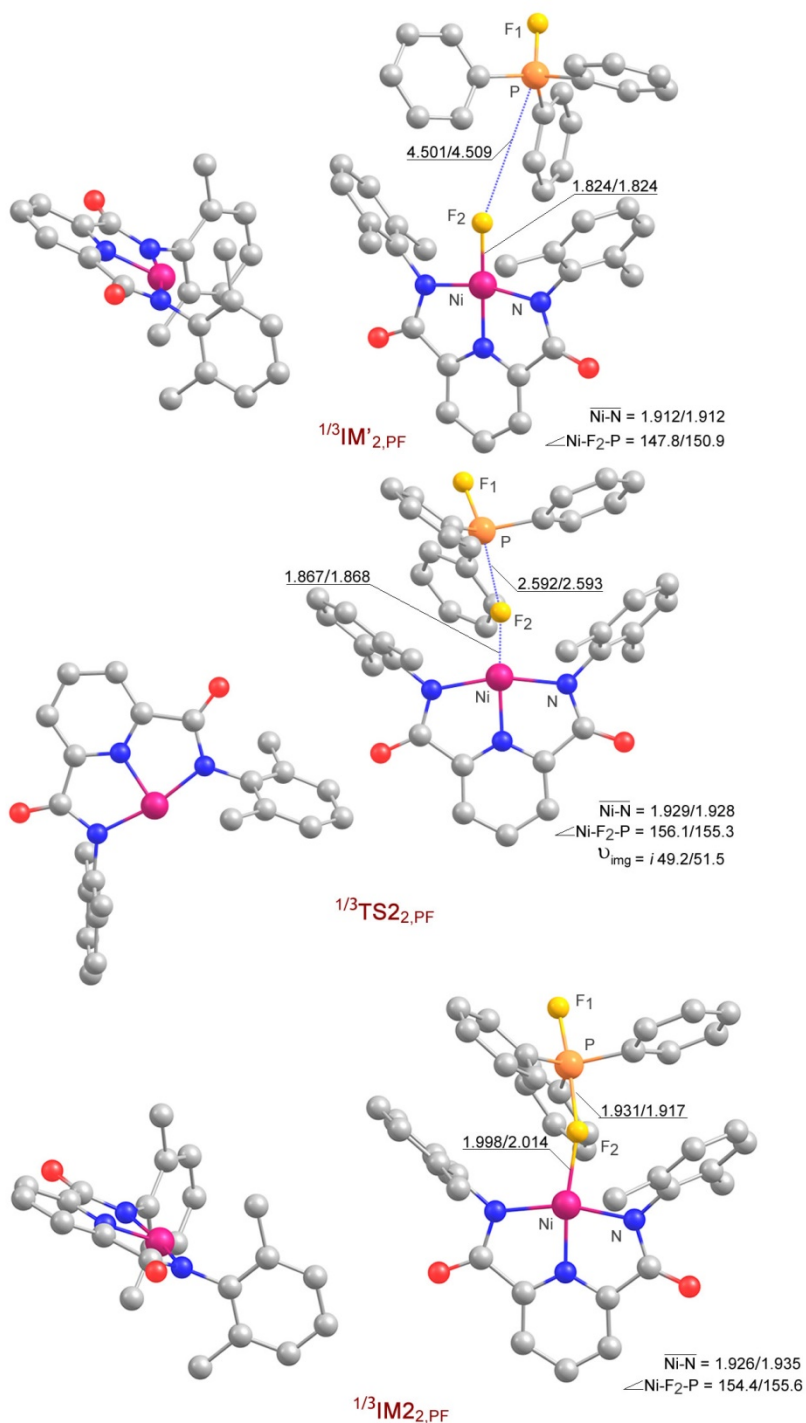

**Fig. S33** Optimized structures of the reaction intermediates of difluorination of  $\text{PPh}_3$  by the cooperation of two  $\mathbf{1}_{\text{FS}}$  on the singlet/triplet spin states. Calculations were done at the UB3LYP/B2//B1 level in solvent. Lengths are in Å units, bond angles are in degree units and imaginary frequencies are in  $\text{cm}^{-1}$  units. Hydrogen atoms of the ligand are omitted for clarity. (To be continued.)

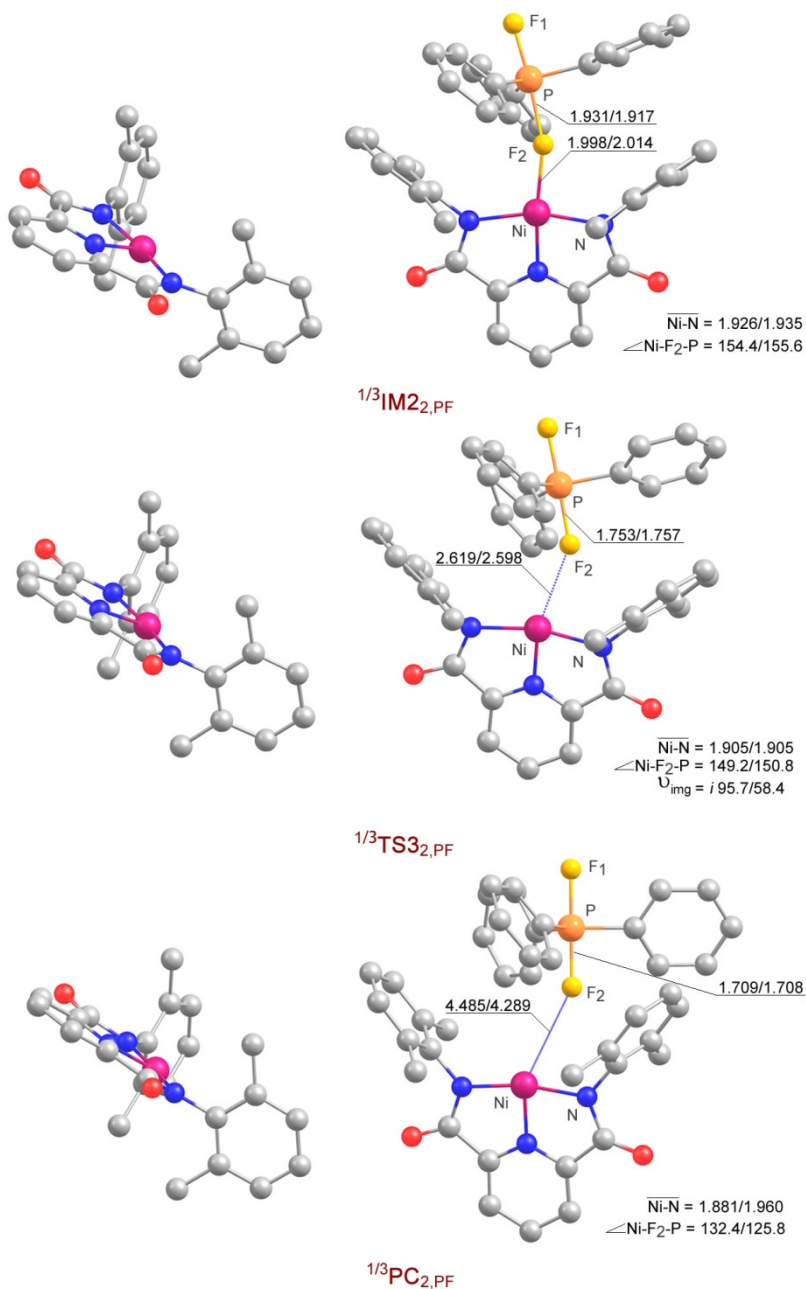

**Fig. S34** Optimized structures of the reaction intermediates of difluorination of  $\text{PPh}_3$  by the cooperation of two  $\mathbf{1}_{\text{FS}}$ . Calculations were done at the UB3LYP/B2//B1 level in solvent. Lengths are in Å units, bond angles are in degree units and imaginary frequencies are in  $\text{cm}^{-1}$  units. Hydrogen atoms of the ligand are omitted for clarity.

## PART IX. Cartesian coordinates

### D) The Calculated data on the oxidants **1<sub>F</sub>** and **1<sub>Cl</sub>**

<sup>2</sup>**1<sub>F</sub>**

|    |              |              |              |                                   |              |              |              |
|----|--------------|--------------|--------------|-----------------------------------|--------------|--------------|--------------|
| Ni | 0.084108000  | 0.034799000  | 0.027763000  | H                                 | -2.369711000 | 2.345164000  | -4.649417000 |
| N  | 0.093744000  | -0.009572000 | 1.910516000  | C                                 | -2.391934000 | 0.202867000  | -4.889500000 |
| N  | 1.925763000  | 0.126958000  | 0.223231000  | H                                 | -3.136130000 | 0.221138000  | -5.680749000 |
| N  | 0.480564000  | 0.133239000  | -1.810046000 | C                                 | -1.868454000 | -1.015457000 | -4.450828000 |
| C  | -1.064921000 | -0.101737000 | 2.736080000  | H                                 | -2.205671000 | -1.944695000 | -4.902439000 |
| C  | -1.569049000 | -1.376439000 | 3.070394000  | C                                 | -0.909895000 | -1.062201000 | -3.430036000 |
| C  | -0.892837000 | -2.633904000 | 2.579832000  | C                                 | -0.346344000 | -2.381030000 | -2.958754000 |
| H  | 0.134395000  | -2.711204000 | 2.954368000  | H                                 | 0.734162000  | -2.441457000 | -3.133009000 |
| H  | -1.439231000 | -3.520241000 | 2.912352000  | H                                 | -0.818825000 | -3.213035000 | -3.487239000 |
| H  | -0.836972000 | -2.656693000 | 1.485869000  | H                                 | -0.505453000 | -2.523012000 | -1.884197000 |
| C  | -2.715859000 | -1.444932000 | 3.872133000  | F                                 | -1.712915000 | -0.082862000 | -0.163156000 |
| H  | -3.116308000 | -2.419103000 | 4.140221000  | <sup>4</sup> <b>1<sub>F</sub></b> |              |              |              |
| C  | -3.345783000 | -0.283504000 | 4.325043000  | Ni                                | -0.247782000 | 0.409313000  | 0.125936000  |
| H  | -4.235265000 | -0.354429000 | 4.944724000  | N                                 | -0.014653000 | 0.060933000  | 2.113177000  |
| C  | -2.834042000 | 0.969010000  | 3.978442000  | N                                 | 1.740135000  | 0.067711000  | 0.170632000  |
| H  | -3.326304000 | 1.872115000  | 4.329499000  | N                                 | 0.480071000  | 0.505193000  | -2.151602000 |
| C  | -1.689402000 | 1.083114000  | 3.178583000  | C                                 | -1.077811000 | 0.060369000  | 3.058177000  |
| C  | -1.139910000 | 2.438021000  | 2.802540000  | C                                 | -1.723790000 | -1.152987000 | 3.381949000  |
| H  | -1.083540000 | 2.558209000  | 1.714927000  | C                                 | -1.265328000 | -2.455413000 | 2.769885000  |
| H  | -0.126160000 | 2.583509000  | 3.193213000  | H                                 | -0.230688000 | -2.686932000 | 3.047239000  |
| H  | -1.771743000 | 3.235261000  | 3.202422000  | H                                 | -1.897976000 | -3.283830000 | 3.100423000  |
| C  | 1.337997000  | 0.028399000  | 2.501450000  | H                                 | -1.298474000 | -2.415025000 | 1.674924000  |
| O  | 1.582123000  | -0.000889000 | 3.707553000  | C                                 | -2.801148000 | -1.124185000 | 4.278415000  |
| C  | 2.423325000  | 0.111798000  | 1.460422000  | H                                 | -3.302711000 | -2.054682000 | 4.533032000  |
| C  | 3.801787000  | 0.168316000  | 1.645484000  | C                                 | -3.235902000 | 0.077801000  | 4.842203000  |
| H  | 4.214907000  | 0.155868000  | 2.647328000  | H                                 | -4.073244000 | 0.084501000  | 5.534538000  |
| C  | 4.616589000  | 0.239642000  | 0.507485000  | C                                 | -2.590980000 | 1.271397000  | 4.509279000  |
| H  | 5.694422000  | 0.284021000  | 0.621238000  | H                                 | -2.927581000 | 2.208872000  | 4.945221000  |
| C  | 4.053996000  | 0.255577000  | -0.775947000 | C                                 | -1.509666000 | 1.283048000  | 3.616996000  |
| H  | 4.664506000  | 0.312041000  | -1.669587000 | C                                 | -0.819560000 | 2.578511000  | 3.260074000  |
| C  | 2.667370000  | 0.196721000  | -0.882825000 | H                                 | -0.864079000 | 2.772060000  | 2.181892000  |
| C  | 1.819735000  | 0.205492000  | -2.127724000 | H                                 | 0.241526000  | 2.557951000  | 3.533280000  |
| O  | 2.306893000  | 0.272450000  | -3.256114000 | H                                 | -1.286297000 | 3.421796000  | 3.776674000  |
| C  | -0.484209000 | 0.155734000  | -2.859746000 | C                                 | 1.237057000  | -0.174625000 | 2.526927000  |
| C  | -1.003405000 | 1.396671000  | -3.285869000 | O                                 | 1.641656000  | -0.397179000 | 3.689779000  |
| C  | -0.540652000 | 2.690195000  | -2.659603000 | C                                 | 2.244516000  | -0.155955000 | 1.392353000  |
| H  | -0.711564000 | 2.694791000  | -1.577374000 | C                                 | 3.613479000  | -0.358275000 | 1.574371000  |
| H  | -1.073389000 | 3.540598000  | -3.092880000 | H                                 | 3.993815000  | -0.538388000 | 2.572500000  |
| H  | 0.532542000  | 2.850920000  | -2.814181000 | C                                 | 4.450962000  | -0.318781000 | 0.457105000  |
| C  | -1.960536000 | 1.397638000  | -4.308872000 | H                                 | 5.519364000  | -0.470777000 | 0.570008000  |

|                             |              |              |              |                              |              |              |              |
|-----------------------------|--------------|--------------|--------------|------------------------------|--------------|--------------|--------------|
| C                           | 3.907219000  | -0.085115000 | -0.808735000 | H                            | -0.092070000 | 3.089840000  | 4.336121000  |
| H                           | 4.521362000  | -0.050907000 | -1.700284000 | C                            | 1.293282000  | -0.283050000 | 2.534220000  |
| C                           | 2.528795000  | 0.104912000  | -0.911446000 | O                            | 1.620623000  | -0.582725000 | 3.710616000  |
| C                           | 1.844261000  | 0.334672000  | -2.228864000 | C                            | 2.201837000  | -0.056256000 | 1.450118000  |
| O                           | 2.502107000  | 0.462839000  | -3.265910000 | C                            | 3.607065000  | -0.019793000 | 1.592096000  |
| C                           | -0.359399000 | 0.253609000  | -3.181231000 | H                            | 4.032033000  | -0.179042000 | 2.577802000  |
| C                           | -1.423215000 | 1.213810000  | -3.422950000 | C                            | 4.412518000  | 0.223940000  | 0.493915000  |
| C                           | -1.510918000 | 2.474004000  | -2.612285000 | H                            | 5.491769000  | 0.260301000  | 0.596935000  |
| H                           | -1.784198000 | 2.233771000  | -1.578553000 | C                            | 3.806718000  | 0.424408000  | -0.781062000 |
| H                           | -2.266588000 | 3.143175000  | -3.030375000 | H                            | 4.398787000  | 0.611995000  | -1.669146000 |
| H                           | -0.551397000 | 3.000095000  | -2.588176000 | C                            | 2.431943000  | 0.361235000  | -0.880743000 |
| C                           | -2.308825000 | 0.977399000  | -4.464808000 | C                            | 1.726918000  | 0.510444000  | -2.179851000 |
| H                           | -3.084375000 | 1.706000000  | -4.679262000 | O                            | 2.298780000  | 0.858932000  | -3.220315000 |
| C                           | -2.209422000 | -0.180535000 | -5.248427000 | C                            | -0.398246000 | 0.032393000  | -3.197632000 |
| H                           | -2.921433000 | -0.351981000 | -6.049904000 | C                            | -1.638256000 | 0.760036000  | -3.396925000 |
| C                           | -1.202201000 | -1.129715000 | -5.000420000 | C                            | -2.015093000 | 1.895102000  | -2.487993000 |
| H                           | -1.166551000 | -2.034878000 | -5.598951000 | H                            | -2.225970000 | 1.513532000  | -1.483072000 |
| C                           | -0.265314000 | -0.946902000 | -3.995251000 | H                            | -2.904341000 | 2.405044000  | -2.866617000 |
| C                           | 0.750887000  | -2.024810000 | -3.722171000 | H                            | -1.203682000 | 2.625632000  | -2.405765000 |
| H                           | 1.731577000  | -1.758103000 | -4.128083000 | C                            | -2.420906000 | 0.452489000  | -4.501871000 |
| H                           | 0.434947000  | -2.962502000 | -4.184647000 | H                            | -3.328542000 | 1.019751000  | -4.684386000 |
| H                           | 0.878670000  | -2.202519000 | -2.649806000 | C                            | -2.050198000 | -0.566256000 | -5.389717000 |
| F                           | -2.098387000 | 0.635135000  | -0.111826000 | H                            | -2.685419000 | -0.801402000 | -6.238494000 |
| <sup>6</sup> I <sub>F</sub> |              |              |              | C                            | -0.866626000 | -1.294399000 | -5.185461000 |
| Ni                          | -0.307914000 | -0.049442000 | 0.012732000  | H                            | -0.618624000 | -2.106383000 | -5.862693000 |
| N                           | -0.091709000 | -0.285873000 | 2.150491000  | C                            | -0.016594000 | -1.017754000 | -4.124163000 |
| N                           | 1.631173000  | 0.130628000  | 0.198440000  | C                            | 1.195446000  | -1.887862000 | -3.906004000 |
| N                           | 0.341336000  | 0.341721000  | -2.102450000 | H                            | 2.105576000  | -1.398056000 | -4.264911000 |
| C                           | -1.049519000 | 0.016901000  | 3.073759000  | H                            | 1.079538000  | -2.830455000 | -4.446205000 |
| C                           | -2.226548000 | -0.820530000 | 3.123041000  | H                            | 1.345862000  | -2.120369000 | -2.847359000 |
| C                           | -2.326070000 | -2.056590000 | 2.271507000  | F                            | -2.156145000 | -0.283910000 | -0.272514000 |
| H                           | -1.477760000 | -2.726986000 | 2.448567000  | <sup>2</sup> I <sub>Cl</sub> |              |              |              |
| H                           | -3.246478000 | -2.600628000 | 2.499724000  | Ni                           | 0.007687000  | 0.029858000  | 0.018184000  |
| H                           | -2.324755000 | -1.788171000 | 1.210003000  | N                            | 0.036717000  | -0.022425000 | 1.917572000  |
| C                           | -3.220009000 | -0.525934000 | 4.051520000  | N                            | 1.867922000  | 0.109070000  | 0.214630000  |
| H                           | -4.087611000 | -1.175658000 | 4.121128000  | N                            | 0.425524000  | 0.134116000  | -1.832212000 |
| C                           | -3.110580000 | 0.578544000  | 4.904397000  | C                            | -1.081715000 | -0.102062000 | 2.803944000  |
| H                           | -3.904150000 | 0.798279000  | 5.612484000  | C                            | -1.553351000 | -1.370357000 | 3.201622000  |
| C                           | -1.983152000 | 1.409786000  | 4.840583000  | C                            | -0.902240000 | -2.635961000 | 2.699374000  |
| H                           | -1.931393000 | 2.287661000  | 5.478486000  | H                            | 0.148497000  | -2.697200000 | 3.004530000  |
| C                           | -0.936887000 | 1.154682000  | 3.960754000  | H                            | -1.417959000 | -3.516280000 | 3.091355000  |
| C                           | 0.198990000  | 2.146169000  | 3.867829000  | H                            | -0.922023000 | -2.685799000 | 1.605114000  |
| H                           | 0.471208000  | 2.354624000  | 2.828657000  | C                            | -2.647733000 | -1.425278000 | 4.074565000  |
| H                           | 1.096357000  | 1.777333000  | 4.372445000  | H                            | -3.023571000 | -2.394651000 | 4.390979000  |

|                  |              |              |              |   |              |              |              |
|------------------|--------------|--------------|--------------|---|--------------|--------------|--------------|
| C                | -3.256452000 | -0.256454000 | 4.537763000  | C | -1.115385000 | 0.004360000  | 3.033811000  |
| H                | -4.105249000 | -0.316804000 | 5.212989000  | C | -1.687465000 | -1.177320000 | 3.552216000  |
| C                | -2.775016000 | 0.989768000  | 4.129957000  | C | -1.162794000 | -2.532922000 | 3.144504000  |
| H                | -3.249630000 | 1.898824000  | 4.489603000  | H | -0.118205000 | -2.666363000 | 3.447797000  |
| C                | -1.683042000 | 1.089799000  | 3.257845000  | H | -1.752828000 | -3.330988000 | 3.603469000  |
| C                | -1.168378000 | 2.438075000  | 2.815917000  | H | -1.198617000 | -2.661201000 | 2.056637000  |
| H                | -1.194073000 | 2.535108000  | 1.724934000  | C | -2.758834000 | -1.065258000 | 4.449150000  |
| H                | -0.129283000 | 2.594338000  | 3.127212000  | H | -3.206246000 | -1.969932000 | 4.853503000  |
| H                | -1.772815000 | 3.241021000  | 3.245508000  | C | -3.256441000 | 0.185040000  | 4.824370000  |
| C                | 1.292263000  | 0.009259000  | 2.491411000  | H | -4.088678000 | 0.254826000  | 5.519397000  |
| O                | 1.546630000  | -0.018759000 | 3.695622000  | C | -2.681170000 | 1.344948000  | 4.300673000  |
| C                | 2.369052000  | 0.088153000  | 1.448504000  | H | -3.066162000 | 2.319672000  | 4.590157000  |
| C                | 3.747636000  | 0.137985000  | 1.635087000  | C | -1.607569000 | 1.275065000  | 3.401756000  |
| H                | 4.158334000  | 0.121190000  | 2.637801000  | C | -0.991717000 | 2.534163000  | 2.839142000  |
| C                | 4.563565000  | 0.209059000  | 0.498472000  | H | -1.060892000 | 2.559513000  | 1.745243000  |
| H                | 5.641525000  | 0.248456000  | 0.611881000  | H | 0.072804000  | 2.608960000  | 3.088866000  |
| C                | 3.998849000  | 0.231034000  | -0.783441000 | H | -1.495332000 | 3.421222000  | 3.233121000  |
| H                | 4.606811000  | 0.286919000  | -1.678776000 | C | 1.212642000  | -0.212644000 | 2.537837000  |
| C                | 2.611695000  | 0.178640000  | -0.888001000 | O | 1.593313000  | -0.310859000 | 3.718682000  |
| C                | 1.772200000  | 0.194275000  | -2.132361000 | C | 2.236611000  | -0.225880000 | 1.422578000  |
| O                | 2.268404000  | 0.267191000  | -3.256656000 | C | 3.611542000  | -0.325301000 | 1.635344000  |
| C                | -0.488767000 | 0.161834000  | -2.930524000 | H | 3.986892000  | -0.434550000 | 2.645706000  |
| C                | -0.993866000 | 1.403436000  | -3.368954000 | C | 4.463082000  | -0.272855000 | 0.528878000  |
| C                | -0.589237000 | 2.690816000  | -2.692944000 | H | 5.536958000  | -0.351800000 | 0.662316000  |
| H                | -0.855978000 | 2.682082000  | -1.630236000 | C | 3.926840000  | -0.101897000 | -0.749811000 |
| H                | -1.083996000 | 3.544751000  | -3.162650000 | H | 4.553236000  | -0.034936000 | -1.631020000 |
| H                | 0.492866000  | 2.853840000  | -2.750236000 | C | 2.540577000  | -0.007755000 | -0.880614000 |
| C                | -1.885433000 | 1.410929000  | -4.449637000 | C | 1.866964000  | 0.218835000  | -2.204240000 |
| H                | -2.283202000 | 2.359441000  | -4.800520000 | O | 2.534396000  | 0.335878000  | -3.236789000 |
| C                | -2.265148000 | 0.221263000  | -5.075402000 | C | -0.329114000 | 0.285360000  | -3.171827000 |
| H                | -2.958645000 | 0.244245000  | -5.911205000 | C | -1.335998000 | 1.318018000  | -3.356505000 |
| C                | -1.754500000 | -0.998217000 | -4.624379000 | C | -1.348797000 | 2.533412000  | -2.474335000 |
| H                | -2.050984000 | -1.923622000 | -5.110905000 | H | -1.586039000 | 2.267822000  | -1.439570000 |
| C                | -0.860499000 | -1.050696000 | -3.546949000 | H | -2.095879000 | 3.249279000  | -2.824332000 |
| C                | -0.314299000 | -2.370801000 | -3.060234000 | H | -0.370651000 | 3.024965000  | -2.464088000 |
| H                | 0.775556000  | -2.418226000 | -3.165293000 | C | -2.219516000 | 1.203159000  | -4.417959000 |
| H                | -0.743183000 | -3.198979000 | -3.630146000 | H | -2.949690000 | 1.987049000  | -4.592801000 |
| H                | -0.541895000 | -2.529074000 | -2.000371000 | C | -2.176586000 | 0.092277000  | -5.274538000 |
| Cl               | -2.182512000 | -0.106026000 | -0.214376000 | H | -2.887843000 | 0.014239000  | -6.091102000 |
| <sup>41</sup> Ca |              |              |              | C | -1.229630000 | -0.929097000 | -5.080448000 |
| Ni               | -0.273464000 | -0.073106000 | 0.111332000  | H | -1.241274000 | -1.794995000 | -5.735344000 |
| N                | -0.054075000 | -0.076574000 | 2.085325000  | C | -0.295507000 | -0.866385000 | -4.058686000 |
| N                | 1.737192000  | -0.089586000 | 0.186828000  | C | 0.650664000  | -2.017201000 | -3.841225000 |
| N                | 0.510072000  | 0.429792000  | -2.122892000 | H | 1.653403000  | -1.780578000 | -4.209994000 |

|                  |              |              |              |    |              |              |              |
|------------------|--------------|--------------|--------------|----|--------------|--------------|--------------|
| H                | 0.291879000  | -2.902209000 | -4.371369000 | C  | 3.586573000  | -0.035511000 | 1.649278000  |
| H                | 0.744311000  | -2.270929000 | -2.780624000 | H  | 3.995274000  | -0.089949000 | 2.651566000  |
| Cl               | -2.483915000 | -0.414025000 | -0.322558000 | C  | 4.422984000  | 0.166919000  | 0.512892000  |
| <sup>61</sup> Cl |              |              |              | H  | 5.497597000  | 0.249720000  | 0.632586000  |
| Ni               | -0.286002000 | -0.238440000 | -0.061671000 | C  | 3.838743000  | 0.283338000  | -0.739115000 |
| N                | -0.051892000 | -0.388004000 | 2.245028000  | H  | 4.436828000  | 0.468294000  | -1.625309000 |
| N                | 1.644094000  | -0.078598000 | 0.229430000  | C  | 2.443806000  | 0.167551000  | -0.883866000 |
| N                | 0.334332000  | 0.206062000  | -2.038087000 | C  | 1.761531000  | 0.333065000  | -2.137566000 |
| C                | -1.052206000 | -0.040131000 | 3.099254000  | O  | 2.302417000  | 0.687233000  | -3.210659000 |
| C                | -2.127424000 | -0.986396000 | 3.304714000  | C  | -0.409229000 | 0.070371000  | -3.175339000 |
| C                | -1.997644000 | -2.394402000 | 2.798325000  | C  | -1.578482000 | 0.905964000  | -3.321739000 |
| H                | -1.210812000 | -2.922728000 | 3.351370000  | C  | -1.913825000 | 1.966113000  | -2.305340000 |
| H                | -2.933890000 | -2.940701000 | 2.936560000  | H  | -2.277203000 | 1.515228000  | -1.376202000 |
| H                | -1.724652000 | -2.417248000 | 1.741629000  | H  | -2.699277000 | 2.621999000  | -2.689010000 |
| C                | -3.201271000 | -0.615050000 | 4.105064000  | H  | -1.042219000 | 2.578553000  | -2.056564000 |
| H                | -3.998312000 | -1.328823000 | 4.290116000  | C  | -2.338052000 | 0.793406000  | -4.480608000 |
| C                | -3.253273000 | 0.653332000  | 4.696067000  | H  | -3.189111000 | 1.453141000  | -4.621359000 |
| H                | -4.107036000 | 0.930376000  | 5.307099000  | C  | -2.016539000 | -0.143684000 | -5.470626000 |
| C                | -2.205215000 | 1.570570000  | 4.510698000  | H  | -2.634486000 | -0.226230000 | -6.359664000 |
| H                | -2.274690000 | 2.555919000  | 4.961922000  | C  | -0.907682000 | -0.985601000 | -5.311044000 |
| C                | -1.090181000 | 1.254529000  | 3.746536000  | H  | -0.698697000 | -1.740948000 | -6.063197000 |
| C                | -0.019577000 | 2.291204000  | 3.519571000  | C  | -0.079023000 | -0.897171000 | -4.197533000 |
| H                | 0.260018000  | 2.360918000  | 2.463507000  | C  | 1.035051000  | -1.904345000 | -4.034160000 |
| H                | 0.887917000  | 2.054773000  | 4.083592000  | H  | 1.994845000  | -1.491751000 | -4.356896000 |
| H                | -0.372336000 | 3.273506000  | 3.841823000  | H  | 0.824648000  | -2.791241000 | -4.637301000 |
| C                | 1.289057000  | -0.274565000 | 2.608597000  | H  | 1.148453000  | -2.221594000 | -2.993789000 |
| O                | 1.663687000  | -0.380425000 | 3.785588000  | Cl | -2.305921000 | -1.168200000 | -0.509200000 |
| C                | 2.225366000  | -0.143240000 | 1.469002000  |    |              |              |              |

## II) C-H bond activation of CHD by the oxidants **1<sub>F</sub>** and **1<sub>Cl</sub>**

|                              |              |              |              |   |              |              |             |
|------------------------------|--------------|--------------|--------------|---|--------------|--------------|-------------|
| <sup>2</sup> RC <sub>F</sub> |              |              |              | H | -3.071189000 | -2.021360000 | 4.248418000 |
| Ni                           | 0.300899000  | 0.043062000  | 0.072087000  | C | -2.919940000 | 0.109284000  | 4.539507000 |
| N                            | 0.394720000  | -0.077549000 | 1.947906000  | H | -3.777443000 | 0.157904000  | 5.204765000 |
| N                            | 2.143944000  | -0.138349000 | 0.170682000  | C | -2.216940000 | 1.273177000  | 4.220107000 |
| N                            | 0.618927000  | 0.161735000  | -1.780646000 | H | -2.528709000 | 2.227010000  | 4.637513000 |
| C                            | -0.721561000 | -0.015141000 | 2.832761000  | C | -1.109872000 | 1.233497000  | 3.362404000 |
| C                            | -1.421349000 | -1.201448000 | 3.138753000  | C | -0.354183000 | 2.493850000  | 3.016726000 |
| C                            | -0.995843000 | -2.528118000 | 2.557575000  | H | -0.324888000 | 2.658012000  | 1.933845000 |
| H                            | 0.022255000  | -2.794312000 | 2.864153000  | H | 0.685242000  | 2.447107000  | 3.361566000 |
| H                            | -1.665981000 | -3.326171000 | 2.887439000  | H | -0.823194000 | 3.364581000  | 3.482034000 |
| H                            | -1.004140000 | -2.504945000 | 1.462254000  | C | 1.658486000  | -0.243773000 | 2.472423000 |
| C                            | -2.522485000 | -1.116490000 | 4.000814000  | O | 1.954013000  | -0.355982000 | 3.661945000 |

|                              |              |              |              |   |              |              |              |
|------------------------------|--------------|--------------|--------------|---|--------------|--------------|--------------|
| C                            | 2.692860000  | -0.276164000 | 1.378104000  | N | -0.045003000 | 0.078647000  | 1.992967000  |
| C                            | 4.072553000  | -0.422125000 | 1.491392000  | N | 1.795495000  | -0.063131000 | 0.209001000  |
| H                            | 4.527240000  | -0.534760000 | 2.468715000  | N | 0.437469000  | 0.380303000  | -1.920137000 |
| C                            | 4.833608000  | -0.417482000 | 0.314665000  | C | -1.138912000 | 0.177966000  | 2.896230000  |
| H                            | 5.911002000  | -0.529882000 | 0.372189000  | C | -1.912679000 | -0.970281000 | 3.179023000  |
| C                            | 4.218346000  | -0.267486000 | -0.935485000 | C | -1.569753000 | -2.301466000 | 2.554184000  |
| H                            | 4.787584000  | -0.258710000 | -1.857677000 | H | -0.569392000 | -2.638024000 | 2.849750000  |
| C                            | 2.833955000  | -0.126535000 | -0.970351000 | H | -2.288088000 | -3.068423000 | 2.856621000  |
| C                            | 1.937552000  | 0.055343000  | -2.167015000 | H | -1.571419000 | -2.240946000 | 1.459767000  |
| O                            | 2.374646000  | 0.098554000  | -3.316903000 | C | -2.998232000 | -0.850371000 | 4.056741000  |
| C                            | -0.380658000 | 0.371654000  | -2.775604000 | H | -3.594841000 | -1.730470000 | 4.283931000  |
| C                            | -0.703881000 | 1.691726000  | -3.155038000 | C | -3.318959000 | 0.378118000  | 4.640947000  |
| C                            | 0.000875000  | 2.874191000  | -2.535042000 | H | -4.157962000 | 0.453509000  | 5.327317000  |
| H                            | -0.103876000 | 2.875402000  | -1.444371000 | C | -2.550926000 | 1.507665000  | 4.344743000  |
| H                            | -0.409022000 | 3.812013000  | -2.918646000 | H | -2.799413000 | 2.465025000  | 4.796278000  |
| H                            | 1.075044000  | 2.862368000  | -2.753028000 | C | -1.457632000 | 1.428698000  | 3.471988000  |
| C                            | -1.698126000 | 1.877034000  | -4.124518000 | C | -0.632101000 | 2.653767000  | 3.159138000  |
| H                            | -1.958412000 | 2.887486000  | -4.428698000 | H | -0.609196000 | 2.855804000  | 2.082074000  |
| C                            | -2.354064000 | 0.785361000  | -4.698031000 | H | 0.408659000  | 2.529567000  | 3.479361000  |
| H                            | -3.123758000 | 0.946645000  | -5.447586000 | H | -1.038567000 | 3.534342000  | 3.664200000  |
| C                            | -2.022614000 | -0.513419000 | -4.305447000 | C | 1.184081000  | -0.196021000 | 2.505117000  |
| H                            | -2.534788000 | -1.362014000 | -4.751327000 | O | 1.482337000  | -0.377062000 | 3.699518000  |
| C                            | -1.034858000 | -0.744012000 | -3.338847000 | C | 2.257912000  | -0.281055000 | 1.438027000  |
| C                            | -0.680066000 | -2.148804000 | -2.915131000 | C | 3.611364000  | -0.561510000 | 1.625269000  |
| H                            | 0.369917000  | -2.380354000 | -3.127784000 | H | 4.000461000  | -0.739709000 | 2.620873000  |
| H                            | -1.299269000 | -2.878854000 | -3.442730000 | C | 4.434505000  | -0.604372000 | 0.491654000  |
| H                            | -0.826814000 | -2.289672000 | -1.838471000 | H | 5.492283000  | -0.819583000 | 0.604991000  |
| F                            | -1.499429000 | 0.228793000  | -0.016130000 | C | 3.907524000  | -0.376835000 | -0.787086000 |
| H                            | -3.868759000 | 1.391642000  | -0.089367000 | H | 4.527679000  | -0.411440000 | -1.675123000 |
| C                            | -4.799833000 | 1.926187000  | -0.334036000 | C | 2.544001000  | -0.102503000 | -0.891546000 |
| H                            | -4.553662000 | 2.496930000  | -1.244058000 | C | 1.755839000  | 0.159660000  | -2.160924000 |
| C                            | -5.897362000 | 0.936662000  | -0.634553000 | O | 2.334566000  | 0.149145000  | -3.262837000 |
| H                            | -5.705920000 | 0.217479000  | -1.429540000 | C | -0.420680000 | 0.620056000  | -3.031812000 |
| C                            | -7.066556000 | 0.904601000  | 0.018113000  | C | -0.646323000 | 1.944680000  | -3.464640000 |
| H                            | -7.813880000 | 0.160113000  | -0.252388000 | C | 0.049369000  | 3.104241000  | -2.792157000 |
| C                            | -7.425781000 | 1.855580000  | 1.132560000  | H | -0.179993000 | 3.141223000  | -1.720817000 |
| H                            | -7.678406000 | 1.287393000  | 2.042148000  | H | -0.257120000 | 4.053396000  | -3.240526000 |
| H                            | -8.354309000 | 2.392947000  | 0.881434000  | H | 1.139004000  | 3.024435000  | -2.878849000 |
| C                            | -6.327537000 | 2.844371000  | 1.434990000  | C | -1.529878000 | 2.162405000  | -4.531244000 |
| H                            | -6.517868000 | 3.561802000  | 2.231871000  | H | -1.707954000 | 3.179740000  | -4.871375000 |
| C                            | -5.158794000 | 2.875384000  | 0.781404000  | C | -2.178399000 | 1.095366000  | -5.157639000 |
| H                            | -4.410827000 | 3.618630000  | 1.053678000  | H | -2.860797000 | 1.279959000  | -5.982843000 |
| <sup>2</sup> TS <sub>F</sub> |              |              |              | C | -1.947273000 | -0.209911000 | -4.716869000 |
| Ni                           | -0.101392000 | 0.336250000  | 0.004533000  | H | -2.450905000 | -1.042855000 | -5.201533000 |

|                              |              |              |              |                              |              |              |              |
|------------------------------|--------------|--------------|--------------|------------------------------|--------------|--------------|--------------|
| C                            | -1.070854000 | -0.468144000 | -3.653552000 | C                            | 2.246734000  | -0.564265000 | 1.404338000  |
| C                            | -0.828591000 | -1.882155000 | -3.181437000 | C                            | 3.552402000  | -1.050969000 | 1.475883000  |
| H                            | 0.224386000  | -2.167061000 | -3.288029000 | H                            | 3.988517000  | -1.315621000 | 2.431986000  |
| H                            | -1.430679000 | -2.591613000 | -3.755933000 | C                            | 4.268321000  | -1.181182000 | 0.277270000  |
| H                            | -1.080763000 | -1.998005000 | -2.120916000 | H                            | 5.286340000  | -1.557051000 | 0.300583000  |
| F                            | -2.016573000 | 0.744449000  | -0.210837000 | C                            | 3.688655000  | -0.832093000 | -0.950811000 |
| H                            | -3.276476000 | 1.019742000  | -0.408201000 | H                            | 4.230432000  | -0.926543000 | -1.884594000 |
| C                            | -4.497781000 | 1.288862000  | -0.621655000 | C                            | 2.378399000  | -0.352705000 | -0.938421000 |
| H                            | -4.407937000 | 1.408368000  | -1.706368000 | C                            | 1.546108000  | 0.088916000  | -2.129183000 |
| C                            | -5.206572000 | 0.092575000  | -0.170865000 | O                            | 2.035027000  | 0.042029000  | -3.272804000 |
| H                            | -5.175066000 | -0.792541000 | -0.800391000 | C                            | -0.576370000 | 0.930018000  | -2.823837000 |
| C                            | -5.849156000 | 0.057681000  | 1.024802000  | C                            | -0.717364000 | 2.308523000  | -3.093849000 |
| H                            | -6.343332000 | -0.852180000 | 1.354876000  | C                            | 0.093258000  | 3.332716000  | -2.334693000 |
| C                            | -5.910147000 | 1.246109000  | 1.928022000  | H                            | -0.117443000 | 3.298220000  | -1.259378000 |
| H                            | -5.352095000 | 1.017515000  | 2.860294000  | H                            | -0.128202000 | 4.342459000  | -2.691497000 |
| H                            | -6.939104000 | 1.404133000  | 2.290174000  | H                            | 1.169052000  | 3.159351000  | -2.450490000 |
| C                            | -5.364518000 | 2.503755000  | 1.334231000  | C                            | -1.620699000 | 2.710644000  | -4.088569000 |
| H                            | -5.496083000 | 3.424770000  | 1.895836000  | H                            | -1.733767000 | 3.770669000  | -4.302577000 |
| C                            | -4.726033000 | 2.517920000  | 0.135991000  | C                            | -2.367110000 | 1.772583000  | -4.804884000 |
| H                            | -4.334567000 | 3.449424000  | -0.263830000 | H                            | -3.063039000 | 2.099566000  | -5.572588000 |
| <sup>2</sup> IM <sub>F</sub> |              |              |              | C                            | -2.215136000 | 0.411689000  | -4.528900000 |
| Ni                           | -0.097398000 | 0.451341000  | 0.178012000  | H                            | -2.794484000 | -0.321931000 | -5.084328000 |
| N                            | 0.081435000  | 0.154477000  | 2.148969000  | C                            | -1.324107000 | -0.030220000 | -3.540520000 |
| N                            | 1.732707000  | -0.245472000 | 0.219517000  | C                            | -1.171085000 | -1.504194000 | -3.248915000 |
| N                            | 0.300520000  | 0.508449000  | -1.779209000 | H                            | -0.155187000 | -1.851751000 | -3.468169000 |
| C                            | -0.910955000 | 0.400077000  | 3.145170000  | H                            | -1.867306000 | -2.093084000 | -3.852448000 |
| C                            | -1.791878000 | -0.636795000 | 3.521239000  | H                            | -1.360696000 | -1.725151000 | -2.192226000 |
| C                            | -1.662252000 | -2.015581000 | 2.918291000  | F                            | -2.057293000 | 1.481748000  | 0.206200000  |
| H                            | -0.690089000 | -2.465585000 | 3.149534000  | H                            | -2.841548000 | 1.162925000  | -0.255146000 |
| H                            | -2.442016000 | -2.680658000 | 3.299763000  | C                            | -4.443538000 | 0.652073000  | -1.183209000 |
| H                            | -1.743753000 | -1.983314000 | 1.825571000  | H                            | -3.850080000 | 0.682711000  | -2.093734000 |
| C                            | -2.791502000 | -0.361024000 | 4.465112000  | C                            | -4.624895000 | -0.585204000 | -0.491807000 |
| H                            | -3.473211000 | -1.154999000 | 4.760546000  | H                            | -4.074818000 | -1.460705000 | -0.827028000 |
| C                            | -2.920494000 | 0.911869000  | 5.025656000  | C                            | -5.470064000 | -0.682415000 | 0.580243000  |
| H                            | -3.700557000 | 1.110450000  | 5.755571000  | H                            | -5.591395000 | -1.630828000 | 1.096579000  |
| C                            | -2.042683000 | 1.928434000  | 4.642357000  | C                            | -6.255561000 | 0.492887000  | 1.084479000  |
| H                            | -2.139951000 | 2.920690000  | 5.076309000  | H                            | -6.000161000 | 0.687794000  | 2.143209000  |
| C                            | -1.029600000 | 1.691453000  | 3.702223000  | H                            | -7.329180000 | 0.236504000  | 1.134256000  |
| C                            | -0.084564000 | 2.796897000  | 3.294143000  | C                            | -6.063159000 | 1.743148000  | 0.276503000  |
| H                            | -0.127872000 | 2.983101000  | 2.214638000  | H                            | -6.631784000 | 2.623336000  | 0.564192000  |
| H                            | 0.955808000  | 2.543722000  | 3.528124000  | C                            | -5.206935000 | 1.794497000  | -0.789435000 |
| H                            | -0.330992000 | 3.728394000  | 3.811318000  | H                            | -5.096464000 | 2.719165000  | -1.350058000 |
| C                            | 1.282173000  | -0.335736000 | 2.555157000  | <sup>4</sup> RC <sub>F</sub> |              |              |              |
| O                            | 1.639571000  | -0.596849000 | 3.718865000  | Ni                           | -0.138913000 | -0.093106000 | 0.150555000  |



|   |              |              |              |                              |              |              |              |
|---|--------------|--------------|--------------|------------------------------|--------------|--------------|--------------|
| N | 0.088259000  | -0.212402000 | 2.126124000  | C                            | -1.166471000 | -0.890429000 | -3.439493000 |
| N | 1.832034000  | 0.292327000  | 0.244917000  | C                            | -1.137483000 | -2.181133000 | -2.673938000 |
| N | 0.652121000  | -0.057294000 | -2.129366000 | H                            | -0.127480000 | -2.599615000 | -2.628740000 |
| C | -0.948646000 | -0.534980000 | 3.048834000  | H                            | -1.801746000 | -2.914066000 | -3.137858000 |
| C | -1.244658000 | -1.891939000 | 3.301153000  | H                            | -1.471035000 | -2.007531000 | -1.644482000 |
| C | -0.442162000 | -2.991036000 | 2.645828000  | F                            | -1.967526000 | -0.287079000 | -0.214552000 |
| H | 0.621033000  | -2.922628000 | 2.902784000  | H                            | -4.119412000 | 0.999919000  | -0.444474000 |
| H | -0.804278000 | -3.974341000 | 2.958602000  | C                            | -5.054088000 | 1.572827000  | -0.549900000 |
| H | -0.506021000 | -2.935427000 | 1.552631000  | H                            | -5.376344000 | 1.385484000  | -1.587157000 |
| C | -2.300388000 | -2.199358000 | 4.171001000  | C                            | -6.091642000 | 1.045115000  | 0.408944000  |
| H | -2.533607000 | -3.242192000 | 4.371823000  | H                            | -6.341920000 | -0.011793000 | 0.328705000  |
| C | -3.049724000 | -1.188703000 | 4.777344000  | C                            | -6.700303000 | 1.799370000  | 1.333556000  |
| H | -3.865959000 | -1.442130000 | 5.448275000  | H                            | -7.438677000 | 1.348761000  | 1.995183000  |
| C | -2.747403000 | 0.149523000  | 4.514603000  | C                            | -6.422504000 | 3.269717000  | 1.524842000  |
| H | -3.331166000 | 0.938611000  | 4.982343000  | H                            | -6.100834000 | 3.457612000  | 2.561807000  |
| C | -1.699782000 | 0.497897000  | 3.650567000  | H                            | -7.357218000 | 3.843985000  | 1.422287000  |
| C | -1.386368000 | 1.947397000  | 3.365717000  | C                            | -5.387289000 | 3.799447000  | 0.563939000  |
| H | -1.429198000 | 2.161395000  | 2.291505000  | H                            | -5.136586000 | 4.856125000  | 0.645268000  |
| H | -0.378037000 | 2.213453000  | 3.702639000  | C                            | -4.779324000 | 3.043485000  | -0.359792000 |
| H | -2.097092000 | 2.604864000  | 3.873906000  | H                            | -4.040240000 | 3.494640000  | -1.020419000 |
| C | 1.316776000  | 0.088595000  | 2.597062000  | <sup>4</sup> TS <sub>F</sub> |              |              |              |
| O | 1.691256000  | 0.134541000  | 3.783969000  | Ni                           | -0.178962000 | 0.176511000  | 0.293877000  |
| C | 2.316412000  | 0.370308000  | 1.492409000  | N                            | 0.182320000  | -0.131095000 | 2.323564000  |
| C | 3.661291000  | 0.658774000  | 1.724078000  | N                            | 1.814406000  | 0.142993000  | 0.324884000  |
| H | 4.024118000  | 0.718224000  | 2.743195000  | N                            | 0.280694000  | 0.393570000  | -1.748928000 |
| C | 4.500983000  | 0.854390000  | 0.624430000  | C                            | -0.813645000 | -0.235026000 | 3.330846000  |
| H | 5.551359000  | 1.082295000  | 0.773344000  | C                            | -1.439964000 | -1.480227000 | 3.559952000  |
| C | 3.985374000  | 0.742606000  | -0.669115000 | C                            | -1.013642000 | -2.704435000 | 2.784723000  |
| H | 4.606369000  | 0.870042000  | -1.547468000 | H                            | 0.042813000  | -2.941012000 | 2.955986000  |
| C | 2.628182000  | 0.453159000  | -0.819446000 | H                            | -1.608330000 | -3.575524000 | 3.074421000  |
| C | 1.983457000  | 0.289145000  | -2.167405000 | H                            | -1.130091000 | -2.553447000 | 1.704906000  |
| O | 2.662008000  | 0.342064000  | -3.197694000 | C                            | -2.461811000 | -1.559089000 | 4.516711000  |
| C | -0.211883000 | 0.166047000  | -3.142663000 | H                            | -2.944857000 | -2.516494000 | 4.697756000  |
| C | -0.254904000 | 1.414409000  | -3.887871000 | C                            | -2.862754000 | -0.430215000 | 5.235556000  |
| C | 0.620815000  | 2.589169000  | -3.540024000 | H                            | -3.656694000 | -0.505469000 | 5.973700000  |
| H | 0.722700000  | 2.714100000  | -2.457458000 | C                            | -2.238900000 | 0.797148000  | 4.997229000  |
| H | 0.192589000  | 3.507594000  | -3.947883000 | H                            | -2.550202000 | 1.679445000  | 5.551781000  |
| H | 1.628018000  | 2.469670000  | -3.950817000 | C                            | -1.213635000 | 0.914844000  | 4.048380000  |
| C | -1.195345000 | 1.539031000  | -4.898309000 | C                            | -0.554503000 | 2.249035000  | 3.790052000  |
| H | -1.259290000 | 2.472313000  | -5.449625000 | H                            | -0.634844000 | 2.535134000  | 2.734769000  |
| C | -2.082745000 | 0.493924000  | -5.210576000 | H                            | 0.514509000  | 2.221635000  | 4.029920000  |
| H | -2.800467000 | 0.623157000  | -6.014981000 | H                            | -1.017287000 | 3.034966000  | 4.393792000  |
| C | -2.061017000 | -0.704810000 | -4.482924000 | C                            | 1.474384000  | -0.183658000 | 2.680679000  |
| H | -2.751156000 | -1.501924000 | -4.741249000 | O                            | 1.957038000  | -0.345519000 | 3.826418000  |

|                              |              |              |              |   |              |              |              |
|------------------------------|--------------|--------------|--------------|---|--------------|--------------|--------------|
| C                            | 2.420055000  | -0.026434000 | 1.503004000  | N | 0.053805000  | -0.077901000 | 2.149885000  |
| C                            | 3.813628000  | -0.047758000 | 1.574315000  | N | 1.811730000  | 0.114094000  | 0.286506000  |
| H                            | 4.303632000  | -0.184413000 | 2.530980000  | N | 0.277047000  | 0.391432000  | -1.758822000 |
| C                            | 4.538358000  | 0.111365000  | 0.387190000  | C | -1.000826000 | -0.151661000 | 3.109240000  |
| H                            | 5.623646000  | 0.099836000  | 0.412238000  | C | -1.520304000 | -1.409821000 | 3.482457000  |
| C                            | 3.873024000  | 0.283906000  | -0.832584000 | C | -0.939212000 | -2.683846000 | 2.916247000  |
| H                            | 4.410020000  | 0.407564000  | -1.765489000 | H | 0.117050000  | -2.798188000 | 3.185112000  |
| C                            | 2.477923000  | 0.293814000  | -0.823951000 | H | -1.480085000 | -3.557042000 | 3.291557000  |
| C                            | 1.591903000  | 0.463603000  | -2.043105000 | H | -0.989650000 | -2.694696000 | 1.821257000  |
| O                            | 2.120272000  | 0.623918000  | -3.165655000 | C | -2.590721000 | -1.453725000 | 4.387190000  |
| C                            | -0.681316000 | 0.575929000  | -2.759778000 | H | -2.996919000 | -2.419150000 | 4.679228000  |
| C                            | -0.961483000 | 1.875353000  | -3.261325000 | C | -3.137209000 | -0.280856000 | 4.913411000  |
| C                            | -0.191563000 | 3.073217000  | -2.764259000 | H | -3.966669000 | -0.331301000 | 5.613522000  |
| H                            | -0.231734000 | 3.145545000  | -1.671369000 | C | -2.613014000 | 0.957007000  | 4.534390000  |
| H                            | -0.596543000 | 3.997095000  | -3.185867000 | H | -3.035092000 | 1.872437000  | 4.942078000  |
| H                            | 0.866279000  | 3.004569000  | -3.040739000 | C | -1.543399000 | 1.042097000  | 3.631580000  |
| C                            | -1.977078000 | 2.025039000  | -4.210079000 | C | -0.983729000 | 2.385255000  | 3.226055000  |
| H                            | -2.204070000 | 3.016732000  | -4.592916000 | H | -1.049308000 | 2.535303000  | 2.141957000  |
| C                            | -2.709070000 | 0.921175000  | -4.665614000 | H | 0.075138000  | 2.477693000  | 3.493223000  |
| H                            | -3.495088000 | 1.055656000  | -5.403161000 | H | -1.528893000 | 3.196520000  | 3.716503000  |
| C                            | -2.417721000 | -0.357472000 | -4.174631000 | C | 1.333995000  | -0.136463000 | 2.604451000  |
| H                            | -2.977271000 | -1.215380000 | -4.538500000 | O | 1.715053000  | -0.259736000 | 3.783023000  |
| C                            | -1.414902000 | -0.549906000 | -3.220155000 | C | 2.360714000  | -0.025066000 | 1.490212000  |
| C                            | -1.105765000 | -1.932067000 | -2.699758000 | C | 3.750618000  | -0.044473000 | 1.610200000  |
| H                            | -0.045506000 | -2.177977000 | -2.821706000 | H | 4.216750000  | -0.157151000 | 2.582042000  |
| H                            | -1.696946000 | -2.685116000 | -3.228065000 | C | 4.509585000  | 0.086599000  | 0.438314000  |
| H                            | -1.328504000 | -2.016563000 | -1.629692000 | H | 5.593253000  | 0.073941000  | 0.499030000  |
| F                            | -2.098915000 | 0.389995000  | 0.317292000  | C | 3.889615000  | 0.237031000  | -0.810440000 |
| H                            | -3.207424000 | 0.887437000  | -0.738621000 | H | 4.464241000  | 0.343452000  | -1.723028000 |
| C                            | -4.169571000 | 1.254521000  | -1.299529000 | C | 2.494869000  | 0.247894000  | -0.846729000 |
| H                            | -3.816078000 | 1.126577000  | -2.337211000 | C | 1.602746000  | 0.407201000  | -2.065388000 |
| C                            | -5.237585000 | 0.318394000  | -0.920253000 | O | 2.116542000  | 0.533109000  | -3.191761000 |
| H                            | -5.160214000 | -0.708759000 | -1.265928000 | C | -0.652885000 | 0.564814000  | -2.827688000 |
| C                            | -6.275997000 | 0.693151000  | -0.126934000 | C | -0.950613000 | 1.865117000  | -3.292923000 |
| H                            | -7.037779000 | -0.027375000 | 0.157557000  | C | -0.264427000 | 3.073908000  | -2.702406000 |
| C                            | -6.425809000 | 2.089280000  | 0.370702000  | H | -0.383181000 | 3.109122000  | -1.613502000 |
| H                            | -6.435255000 | 2.088486000  | 1.478140000  | H | -0.674756000 | 3.996320000  | -3.122497000 |
| H                            | -7.437313000 | 2.467070000  | 0.134803000  | H | 0.812684000  | 3.059980000  | -2.904083000 |
| C                            | -5.397822000 | 3.050081000  | -0.118831000 | C | -1.898270000 | 2.013367000  | -4.315474000 |
| H                            | -5.503227000 | 4.091757000  | 0.171410000  | H | -2.132724000 | 3.011279000  | -4.678087000 |
| C                            | -4.365619000 | 2.658848000  | -0.911768000 | C | -2.541627000 | 0.903152000  | -4.867689000 |
| H                            | -3.634779000 | 3.386835000  | -1.252636000 | H | -3.274672000 | 1.034377000  | -5.658867000 |
| <sup>4</sup> IM <sub>F</sub> |              |              |              | C | -2.239569000 | -0.376023000 | -4.395924000 |
| Ni                           | -0.138604000 | 0.110255000  | 0.174791000  | H | -2.736630000 | -1.242846000 | -4.824570000 |

|                               |              |              |              |                               |              |              |              |
|-------------------------------|--------------|--------------|--------------|-------------------------------|--------------|--------------|--------------|
| C                             | -1.296095000 | -0.566657000 | -3.375578000 | C                             | 2.603938000  | 0.029736000  | 1.376857000  |
| C                             | -0.974253000 | -1.957834000 | -2.881446000 | C                             | 3.988169000  | 0.045077000  | 1.524354000  |
| H                             | 0.097726000  | -2.172206000 | -2.951016000 | H                             | 4.426403000  | 0.027914000  | 2.515438000  |
| H                             | -1.510559000 | -2.708823000 | -3.468253000 | C                             | 4.773125000  | 0.082473000  | 0.364610000  |
| H                             | -1.255814000 | -2.087447000 | -1.829475000 | H                             | 5.854635000  | 0.094767000  | 0.447352000  |
| F                             | -2.335777000 | -0.235279000 | 0.111677000  | C                             | 4.173469000  | 0.104946000  | -0.901218000 |
| H                             | -2.961633000 | 0.358503000  | -0.317152000 | H                             | 4.757582000  | 0.135026000  | -1.813591000 |
| C                             | -4.290112000 | 1.448480000  | -1.190375000 | C                             | 2.782975000  | 0.088101000  | -0.966650000 |
| H                             | -3.713587000 | 1.328335000  | -2.104104000 | C                             | 1.909201000  | 0.112152000  | -2.187701000 |
| C                             | -5.380658000 | 0.568148000  | -0.911484000 | O                             | 2.375229000  | 0.154806000  | -3.325848000 |
| H                             | -5.552750000 | -0.280282000 | -1.568897000 | C                             | -0.372694000 | 0.121863000  | -2.922488000 |
| C                             | -6.201160000 | 0.772418000  | 0.164437000  | C                             | -0.857113000 | 1.370820000  | -3.363811000 |
| H                             | -7.022585000 | 0.089319000  | 0.363165000  | C                             | -0.400608000 | 2.655110000  | -2.715848000 |
| C                             | -6.011068000 | 1.927998000  | 1.103557000  | H                             | -0.626883000 | 2.661196000  | -1.643692000 |
| H                             | -5.855613000 | 1.553112000  | 2.132771000  | H                             | -0.894374000 | 3.515652000  | -3.174616000 |
| H                             | -6.951019000 | 2.502379000  | 1.190889000  | H                             | 0.681960000  | 2.794724000  | -2.815317000 |
| C                             | -4.884503000 | 2.842648000  | 0.719556000  | C                             | -1.776374000 | 1.388263000  | -4.420828000 |
| H                             | -4.713039000 | 3.720582000  | 1.336572000  | H                             | -2.158887000 | 2.342583000  | -4.773324000 |
| C                             | -4.088978000 | 2.598694000  | -0.367128000 | C                             | -2.203233000 | 0.201385000  | -5.020789000 |
| H                             | -3.284144000 | 3.286700000  | -0.612806000 | H                             | -2.917687000 | 0.232293000  | -5.838660000 |
| <sup>2</sup> RC <sub>Cl</sub> |              |              |              | C                             | -1.712347000 | -1.025299000 | -4.567731000 |
| Ni                            | 0.202792000  | 0.016868000  | 0.013274000  | H                             | -2.045179000 | -1.948595000 | -5.034623000 |
| N                             | 0.283555000  | -0.016655000 | 1.911480000  | C                             | -0.791908000 | -1.088062000 | -3.513349000 |
| N                             | 2.069523000  | 0.050914000  | 0.157189000  | C                             | -0.266517000 | -2.415822000 | -3.024927000 |
| N                             | 0.570549000  | 0.084297000  | -1.849502000 | H                             | 0.819861000  | -2.489590000 | -3.149983000 |
| C                             | -0.812822000 | -0.055677000 | 2.827390000  | H                             | -0.725095000 | -3.239317000 | -3.578451000 |
| C                             | -1.311096000 | -1.306067000 | 3.249053000  | H                             | -0.477323000 | -2.559285000 | -1.959322000 |
| C                             | -0.710435000 | -2.594134000 | 2.741585000  | Cl                            | -1.992691000 | -0.074988000 | -0.161410000 |
| H                             | 0.347194000  | -2.681686000 | 3.015450000  | H                             | -4.994819000 | 0.633171000  | -0.794905000 |
| H                             | -1.238000000 | -3.456305000 | 3.157713000  | C                             | -6.079957000 | 0.802859000  | -0.880726000 |
| H                             | -0.764798000 | -2.653514000 | 1.648800000  | H                             | -6.181692000 | 1.485929000  | -1.739172000 |
| C                             | -2.384070000 | -1.321090000 | 4.149650000  | C                             | -6.779655000 | -0.499723000 | -1.177076000 |
| H                             | -2.780056000 | -2.276267000 | 4.484422000  | H                             | -6.462099000 | -1.035722000 | -2.070195000 |
| C                             | -2.946318000 | -0.130959000 | 4.616979000  | C                             | -7.748370000 | -1.012373000 | -0.407204000 |
| H                             | -3.779183000 | -0.160385000 | 5.313937000  | H                             | -8.209292000 | -1.959946000 | -0.681949000 |
| C                             | -2.438543000 | 1.096901000  | 4.186411000  | C                             | -8.256458000 | -0.346893000 | 0.847349000  |
| H                             | -2.876663000 | 2.022703000  | 4.549959000  | H                             | -8.144821000 | -1.030109000 | 1.704512000  |
| C                             | -1.366622000 | 1.157386000  | 3.286304000  | H                             | -9.343234000 | -0.183250000 | 0.770258000  |
| C                             | -0.823230000 | 2.486013000  | 2.820279000  | C                             | -7.561389000 | 0.959226000  | 1.140152000  |
| H                             | -0.878267000 | 2.577530000  | 1.729721000  | H                             | -7.881306000 | 1.497055000  | 2.031350000  |
| H                             | 0.229224000  | 2.611439000  | 3.099430000  | C                             | -6.592970000 | 1.471660000  | 0.369754000  |
| H                             | -1.388952000 | 3.310538000  | 3.261796000  | H                             | -6.134525000 | 2.421012000  | 0.642520000  |
| C                             | 1.554720000  | -0.009930000 | 2.450532000  | <sup>2</sup> TS <sub>Cl</sub> |              |              |              |
| O                             | 1.842201000  | -0.032376000 | 3.646953000  | Ni                            | -0.328273000 | -0.227521000 | 0.105084000  |

|   |              |              |              |                               |              |              |              |
|---|--------------|--------------|--------------|-------------------------------|--------------|--------------|--------------|
| N | -0.101989000 | -0.391784000 | 2.102978000  | C                             | -1.108914000 | -1.140831000 | -3.547276000 |
| N | 1.590102000  | 0.194415000  | 0.255580000  | C                             | -0.464981000 | -2.415331000 | -3.055561000 |
| N | 0.096985000  | 0.139851000  | -1.841001000 | H                             | 0.627684000  | -2.365339000 | -3.121860000 |
| C | -1.108292000 | -0.707242000 | 3.065187000  | H                             | -0.802258000 | -3.272446000 | -3.645263000 |
| C | -1.349556000 | -2.055265000 | 3.405545000  | H                             | -0.709639000 | -2.606618000 | -2.004270000 |
| C | -0.524662000 | -3.163775000 | 2.795715000  | Cl                            | -2.714963000 | -0.944084000 | -0.047354000 |
| H | 0.538256000  | -3.055124000 | 3.039462000  | H                             | -3.662806000 | 0.092498000  | -0.654507000 |
| H | -0.857442000 | -4.140058000 | 3.159222000  | C                             | -4.600170000 | 1.031152000  | -1.246922000 |
| H | -0.599536000 | -3.162095000 | 1.701934000  | H                             | -3.906293000 | 1.211851000  | -2.069586000 |
| C | -2.372985000 | -2.346527000 | 4.318788000  | C                             | -5.746693000 | 0.187895000  | -1.507283000 |
| H | -2.564291000 | -3.383169000 | 4.585693000  | H                             | -5.707325000 | -0.496185000 | -2.350240000 |
| C | -3.142958000 | -1.328207000 | 4.885557000  | C                             | -6.839812000 | 0.215660000  | -0.697315000 |
| H | -3.932853000 | -1.569266000 | 5.591753000  | H                             | -7.684026000 | -0.439395000 | -0.894290000 |
| C | -2.892795000 | 0.001621000  | 4.539043000  | C                             | -6.939588000 | 1.143753000  | 0.471141000  |
| H | -3.489663000 | 0.797637000  | 4.977955000  | H                             | -7.052295000 | 0.557032000  | 1.402072000  |
| C | -1.877875000 | 0.332210000  | 3.629696000  | H                             | -7.886643000 | 1.708497000  | 0.423914000  |
| C | -1.616052000 | 1.773000000  | 3.259624000  | C                             | -5.788680000 | 2.088315000  | 0.610759000  |
| H | -1.721383000 | 1.933467000  | 2.180230000  | H                             | -5.844232000 | 2.838031000  | 1.395262000  |
| H | -0.597800000 | 2.078758000  | 3.525881000  | C                             | -4.707617000 | 2.038528000  | -0.214840000 |
| H | -2.314608000 | 2.438934000  | 3.774072000  | H                             | -3.889942000 | 2.742249000  | -0.087562000 |
| C | 1.153304000  | -0.167432000 | 2.568482000  | <sup>2</sup> IM <sub>Cl</sub> |              |              |              |
| O | 1.544547000  | -0.211948000 | 3.750786000  | Ni                            | -0.293957000 | -0.218624000 | 0.069451000  |
| C | 2.138329000  | 0.176723000  | 1.468498000  | N                             | -0.114634000 | -0.390076000 | 2.051522000  |
| C | 3.494278000  | 0.468579000  | 1.619118000  | N                             | 1.590448000  | 0.280757000  | 0.251316000  |
| H | 3.949946000  | 0.457948000  | 2.602255000  | N                             | 0.129853000  | 0.115799000  | -1.856951000 |
| C | 4.230972000  | 0.772836000  | 0.466387000  | C                             | -1.127149000 | -0.767003000 | 2.985721000  |
| H | 5.288156000  | 1.004189000  | 0.550654000  | C                             | -1.321777000 | -2.131832000 | 3.286300000  |
| C | 3.617614000  | 0.784422000  | -0.793567000 | C                             | -0.438364000 | -3.191775000 | 2.671470000  |
| H | 4.169733000  | 1.020242000  | -1.695733000 | H                             | 0.612025000  | -3.050991000 | 2.950827000  |
| C | 2.256972000  | 0.482837000  | -0.859679000 | H                             | -0.744783000 | -4.189234000 | 2.998605000  |
| C | 1.392855000  | 0.445804000  | -2.104606000 | H                             | -0.478920000 | -3.163717000 | 1.576295000  |
| O | 1.906539000  | 0.684807000  | -3.214769000 | C                             | -2.352566000 | -2.485682000 | 4.168749000  |
| C | -0.799802000 | 0.100287000  | -2.950026000 | H                             | -2.509322000 | -3.535365000 | 4.405152000  |
| C | -1.390969000 | 1.295385000  | -3.415457000 | C                             | -3.172749000 | -1.512444000 | 4.743927000  |
| C | -1.051495000 | 2.623419000  | -2.780754000 | H                             | -3.967705000 | -1.801918000 | 5.425777000  |
| H | -1.228010000 | 2.608425000  | -1.699147000 | C                             | -2.966477000 | -0.165215000 | 4.438175000  |
| H | -1.652827000 | 3.426543000  | -3.215986000 | H                             | -3.602186000 | 0.595511000  | 4.884835000  |
| H | 0.005245000  | 2.875723000  | -2.925158000 | C                             | -1.946472000 | 0.227887000  | 3.560094000  |
| C | -2.297515000 | 1.227346000  | -4.483570000 | C                             | -1.730705000 | 1.686848000  | 3.234595000  |
| H | -2.755567000 | 2.144018000  | -4.847493000 | H                             | -1.816125000 | 1.873082000  | 2.157673000  |
| C | -2.614788000 | 0.005522000  | -5.081813000 | H                             | -0.731479000 | 2.022165000  | 3.534974000  |
| H | -3.319131000 | -0.031397000 | -5.908394000 | H                             | -2.466056000 | 2.311911000  | 3.748822000  |
| C | -2.021127000 | -1.168076000 | -4.612118000 | C                             | 1.119003000  | -0.105856000 | 2.549691000  |
| H | -2.262651000 | -2.120925000 | -5.077023000 | O                             | 1.479190000  | -0.138461000 | 3.740499000  |

|                               |              |              |              |   |              |              |              |
|-------------------------------|--------------|--------------|--------------|---|--------------|--------------|--------------|
| C                             | 2.114432000  | 0.285860000  | 1.473998000  | N | -0.029863000 | 0.233803000  | 2.045732000  |
| C                             | 3.455735000  | 0.629397000  | 1.645194000  | N | 1.730202000  | -0.233752000 | 0.153687000  |
| H                             | 3.897651000  | 0.639110000  | 2.634623000  | N | 0.740496000  | 0.531263000  | -2.219476000 |
| C                             | 4.198310000  | 0.955577000  | 0.501570000  | C | -1.066317000 | 0.534172000  | 2.973411000  |
| H                             | 5.244545000  | 1.226626000  | 0.601917000  | C | -1.963984000 | -0.479167000 | 3.375163000  |
| C                             | 3.608381000  | 0.935152000  | -0.770079000 | C | -1.812921000 | -1.890582000 | 2.860290000  |
| H                             | 4.169291000  | 1.182760000  | -1.663633000 | H | -0.854890000 | -2.327241000 | 3.164484000  |
| C                             | 2.261458000  | 0.582090000  | -0.856988000 | H | -2.613296000 | -2.530715000 | 3.241839000  |
| C                             | 1.413914000  | 0.486618000  | -2.111422000 | H | -1.843304000 | -1.919865000 | 1.765061000  |
| O                             | 1.923416000  | 0.735470000  | -3.219255000 | C | -3.000699000 | -0.147539000 | 4.258218000  |
| C                             | -0.754860000 | 0.007137000  | -2.972767000 | H | -3.696379000 | -0.921982000 | 4.572186000  |
| C                             | -1.406590000 | 1.159246000  | -3.463955000 | C | -3.150843000 | 1.157390000  | 4.734291000  |
| C                             | -1.142128000 | 2.515728000  | -2.854555000 | H | -3.960682000 | 1.399098000  | 5.417267000  |
| H                             | -1.333526000 | 2.515342000  | -1.775347000 | C | -2.256231000 | 2.150081000  | 4.327566000  |
| H                             | -1.776170000 | 3.278398000  | -3.315196000 | H | -2.369525000 | 3.166301000  | 4.697386000  |
| H                             | -0.097335000 | 2.817314000  | -2.990553000 | C | -1.206473000 | 1.857386000  | 3.445636000  |
| C                             | -2.303735000 | 1.020596000  | -4.532756000 | C | -0.241594000 | 2.936131000  | 3.013370000  |
| H                             | -2.809295000 | 1.903459000  | -4.916710000 | H | -0.254565000 | 3.074699000  | 1.925801000  |
| C                             | -2.552525000 | -0.228489000 | -5.106368000 | H | 0.789691000  | 2.685989000  | 3.287006000  |
| H                             | -3.250899000 | -0.319976000 | -5.933747000 | H | -0.494393000 | 3.892206000  | 3.480244000  |
| C                             | -1.898505000 | -1.358765000 | -4.611618000 | C | 1.124998000  | -0.274668000 | 2.498985000  |
| H                             | -2.086814000 | -2.332393000 | -5.057551000 | O | 1.443785000  | -0.530668000 | 3.680437000  |
| C                             | -0.993499000 | -1.260943000 | -3.544805000 | C | 2.127448000  | -0.547020000 | 1.395342000  |
| C                             | -0.283688000 | -2.488961000 | -3.025928000 | C | 3.392351000  | -1.088461000 | 1.628547000  |
| H                             | 0.804912000  | -2.382630000 | -3.092559000 | H | 3.684584000  | -1.330138000 | 2.643308000  |
| H                             | -0.574010000 | -3.374563000 | -3.598079000 | C | 4.240628000  | -1.301322000 | 0.539912000  |
| H                             | -0.518568000 | -2.673091000 | -1.971144000 | H | 5.229097000  | -1.722620000 | 0.691440000  |
| Cl                            | -2.820169000 | -1.119930000 | -0.124237000 | C | 3.810260000  | -0.969306000 | -0.746945000 |
| H                             | -3.533464000 | -0.103504000 | -0.589202000 | H | 4.436015000  | -1.118200000 | -1.618456000 |
| C                             | -4.794880000 | 1.368615000  | -1.283925000 | C | 2.532637000  | -0.430104000 | -0.901238000 |
| H                             | -4.065088000 | 1.448261000  | -2.084539000 | C | 1.984467000  | -0.049456000 | -2.247461000 |
| C                             | -5.941110000 | 0.532656000  | -1.445921000 | O | 2.684442000  | -0.155101000 | -3.260607000 |
| H                             | -6.019297000 | -0.086249000 | -2.336266000 | C | -0.078260000 | 0.592893000  | -3.292504000 |
| C                             | -6.930803000 | 0.493737000  | -0.502505000 | C | -0.731994000 | 1.864158000  | -3.554406000 |
| H                             | -7.793430000 | -0.152672000 | -0.640979000 | C | -0.403410000 | 3.073995000  | -2.726995000 |
| C                             | -6.876752000 | 1.328132000  | 0.744889000  | H | -0.758022000 | 2.952263000  | -1.698633000 |
| H                             | -6.920323000 | 0.674464000  | 1.636254000  | H | -0.877271000 | 3.963231000  | -3.149014000 |
| H                             | -7.798477000 | 1.930884000  | 0.836341000  | H | 0.677261000  | 3.241432000  | -2.680530000 |
| C                             | -5.670825000 | 2.219349000  | 0.824691000  | C | -1.590202000 | 1.959718000  | -4.638880000 |
| H                             | -5.583003000 | 2.874739000  | 1.687158000  | H | -2.053788000 | 2.913600000  | -4.870523000 |
| C                             | -4.705185000 | 2.223895000  | -0.144631000 | C | -1.858299000 | 0.844264000  | -5.446855000 |
| H                             | -3.848442000 | 2.886154000  | -0.049030000 | H | -2.545883000 | 0.937125000  | -6.282030000 |
| <sup>4</sup> RC <sub>Cl</sub> |              |              |              | C | -1.252283000 | -0.396540000 | -5.182451000 |
| Ni                            | -0.154491000 | 0.502671000  | 0.043536000  | H | -1.500384000 | -1.251833000 | -5.803674000 |

|                               |              |              |              |                               |              |              |              |
|-------------------------------|--------------|--------------|--------------|-------------------------------|--------------|--------------|--------------|
| C                             | -0.359175000 | -0.557563000 | -4.134555000 | C                             | 2.194176000  | 0.465083000  | 1.494144000  |
| C                             | 0.216711000  | -1.918410000 | -3.845977000 | C                             | 3.554987000  | 0.760999000  | 1.577903000  |
| H                             | 1.252819000  | -1.989838000 | -4.191146000 | H                             | 4.022401000  | 0.897308000  | 2.545845000  |
| H                             | -0.366584000 | -2.688582000 | -4.355504000 | C                             | 4.279215000  | 0.871946000  | 0.384032000  |
| H                             | 0.213614000  | -2.141903000 | -2.774612000 | H                             | 5.339703000  | 1.101600000  | 0.418189000  |
| Cl                            | -2.354400000 | 0.905885000  | -0.412054000 | C                             | 3.648915000  | 0.688189000  | -0.853275000 |
| H                             | -5.565707000 | 0.516601000  | -0.404948000 | H                             | 4.189734000  | 0.767096000  | -1.788860000 |
| C                             | -6.654326000 | 0.349533000  | -0.423543000 | C                             | 2.284640000  | 0.396267000  | -0.856478000 |
| H                             | -7.052611000 | 1.210589000  | -0.983939000 | C                             | 1.421268000  | 0.160824000  | -2.081303000 |
| C                             | -6.963700000 | -0.928672000 | -1.161681000 | O                             | 1.949338000  | 0.218637000  | -3.214316000 |
| H                             | -6.601248000 | -1.004614000 | -2.185765000 | C                             | -0.762777000 | -0.319964000 | -2.864032000 |
| C                             | -7.646162000 | -1.948196000 | -0.624330000 | C                             | -1.336273000 | 0.780690000  | -3.538988000 |
| H                             | -7.832120000 | -2.842961000 | -1.216529000 | C                             | -0.975605000 | 2.195721000  | -3.151729000 |
| C                             | -8.188513000 | -1.938883000 | 0.783044000  | H                             | -1.133258000 | 2.373816000  | -2.081605000 |
| H                             | -7.789311000 | -2.799482000 | 1.343354000  | H                             | -1.575846000 | 2.917683000  | -3.712768000 |
| H                             | -9.277117000 | -2.107773000 | 0.765565000  | H                             | 0.081280000  | 2.405489000  | -3.352488000 |
| C                             | -7.880390000 | -0.660024000 | 1.520993000  | C                             | -2.238839000 | 0.536736000  | -4.584134000 |
| H                             | -8.242632000 | -0.584231000 | 2.545140000  | H                             | -2.682212000 | 1.380367000  | -5.107963000 |
| C                             | -7.197716000 | 0.359132000  | 0.983207000  | C                             | -2.571760000 | -0.767365000 | -4.958410000 |
| H                             | -7.011379000 | 1.253618000  | 1.575646000  | H                             | -3.271971000 | -0.940668000 | -5.771122000 |
| <sup>4</sup> TS <sub>Cl</sub> |              |              |              | C                             | -1.998649000 | -1.846978000 | -4.282462000 |
| Ni                            | -0.310092000 | -0.106127000 | 0.235931000  | H                             | -2.252158000 | -2.863943000 | -4.572445000 |
| N                             | -0.017447000 | 0.009625000  | 2.276527000  | C                             | -1.091170000 | -1.642942000 | -3.232948000 |
| N                             | 1.626341000  | 0.299877000  | 0.298844000  | C                             | -0.464536000 | -2.818358000 | -2.520782000 |
| N                             | 0.134279000  | -0.099415000 | -1.779660000 | H                             | 0.628494000  | -2.796925000 | -2.596594000 |
| C                             | -1.000157000 | -0.185911000 | 3.289174000  | H                             | -0.816503000 | -3.762429000 | -2.946329000 |
| C                             | -1.202761000 | -1.476218000 | 3.825242000  | H                             | -0.706530000 | -2.815417000 | -1.451683000 |
| C                             | -0.352873000 | -2.639492000 | 3.371128000  | Cl                            | -2.730737000 | -0.731049000 | 0.267053000  |
| H                             | 0.707106000  | -2.474110000 | 3.595076000  | H                             | -3.598700000 | 0.209545000  | -0.560518000 |
| H                             | -0.663465000 | -3.564245000 | 3.865683000  | C                             | -4.493296000 | 1.081602000  | -1.323508000 |
| H                             | -0.426893000 | -2.789330000 | 2.287598000  | H                             | -3.643539000 | 1.562861000  | -1.807949000 |
| C                             | -2.209617000 | -1.658893000 | 4.784001000  | C                             | -5.240713000 | 0.108283000  | -2.087672000 |
| H                             | -2.370038000 | -2.650558000 | 5.200552000  | H                             | -4.761559000 | -0.352501000 | -2.946646000 |
| C                             | -3.002962000 | -0.589625000 | 5.206887000  | C                             | -6.499983000 | -0.256262000 | -1.720439000 |
| H                             | -3.779900000 | -0.746371000 | 5.950282000  | H                             | -7.040969000 | -1.006002000 | -2.291332000 |
| C                             | -2.793297000 | 0.681765000  | 4.667246000  | C                             | -7.195087000 | 0.357698000  | -0.547275000 |
| H                             | -3.409111000 | 1.516892000  | 4.992876000  | H                             | -7.437092000 | -0.427781000 | 0.193014000  |
| C                             | -1.796117000 | 0.902629000  | 3.706523000  | H                             | -8.192337000 | 0.722310000  | -0.848584000 |
| C                             | -1.579653000 | 2.278900000  | 3.123463000  | C                             | -6.430183000 | 1.456072000  | 0.120008000  |
| H                             | -1.700476000 | 2.272730000  | 2.033648000  | H                             | -6.919002000 | 1.991083000  | 0.929562000  |
| H                             | -0.567616000 | 2.647504000  | 3.326009000  | C                             | -5.171786000 | 1.800477000  | -0.268314000 |
| H                             | -2.291924000 | 2.995502000  | 3.542344000  | H                             | -4.644999000 | 2.606019000  | 0.235288000  |
| C                             | 1.239441000  | 0.297012000  | 2.662015000  | <sup>4</sup> IM <sub>Cl</sub> |              |              |              |
| O                             | 1.677769000  | 0.430984000  | 3.826815000  | Ni                            | -0.228107000 | -0.062169000 | 0.236620000  |

|   |              |              |              |    |              |              |              |
|---|--------------|--------------|--------------|----|--------------|--------------|--------------|
| N | 0.006856000  | -0.014447000 | 2.223406000  | C  | -0.719241000 | -0.361001000 | -2.797220000 |
| N | 1.685801000  | 0.354548000  | 0.313498000  | C  | -1.322748000 | 0.701274000  | -3.504774000 |
| N | 0.178196000  | -0.081413000 | -1.722239000 | C  | -1.000765000 | 2.137593000  | -3.166053000 |
| C | -0.989653000 | -0.245884000 | 3.220294000  | H  | -1.169188000 | 2.347571000  | -2.103523000 |
| C | -1.194352000 | -1.555034000 | 3.705571000  | H  | -1.617818000 | 2.822924000  | -3.753933000 |
| C | -0.338564000 | -2.701114000 | 3.219668000  | H  | 0.050631000  | 2.369180000  | -3.371178000 |
| H | 0.719744000  | -2.540205000 | 3.454659000  | C  | -2.223703000 | 0.396656000  | -4.535160000 |
| H | -0.649259000 | -3.641022000 | 3.684275000  | H  | -2.691619000 | 1.209353000  | -5.085575000 |
| H | -0.405671000 | -2.818560000 | 2.131804000  | C  | -2.524442000 | -0.927907000 | -4.860684000 |
| C | -2.209734000 | -1.771815000 | 4.648274000  | H  | -3.224545000 | -1.147715000 | -5.662079000 |
| H | -2.373581000 | -2.777701000 | 5.027280000  | C  | -1.920793000 | -1.968297000 | -4.151140000 |
| C | -3.005575000 | -0.718072000 | 5.103186000  | H  | -2.150181000 | -3.000901000 | -4.402936000 |
| H | -3.788688000 | -0.901397000 | 5.833800000  | C  | -1.012979000 | -1.704583000 | -3.115376000 |
| C | -2.791106000 | 0.572358000  | 4.613342000  | C  | -0.353844000 | -2.838353000 | -2.365710000 |
| H | -3.409283000 | 1.395064000  | 4.964560000  | H  | 0.737661000  | -2.798535000 | -2.455767000 |
| C | -1.786226000 | 0.828767000  | 3.669807000  | H  | -0.691121000 | -3.804622000 | -2.751048000 |
| C | -1.566541000 | 2.225958000  | 3.140339000  | H  | -0.582276000 | -2.800198000 | -1.294160000 |
| H | -1.680230000 | 2.261622000  | 2.050444000  | Cl | -2.793676000 | -0.655934000 | 0.255972000  |
| H | -0.556769000 | 2.588097000  | 3.364342000  | H  | -3.447534000 | 0.185619000  | -0.533979000 |
| H | -2.282539000 | 2.925023000  | 3.581425000  | C  | -4.755106000 | 1.387135000  | -1.580320000 |
| C | 1.259309000  | 0.297012000  | 2.652638000  | H  | -3.870428000 | 1.788441000  | -2.065516000 |
| O | 1.648402000  | 0.413363000  | 3.829148000  | C  | -5.456286000 | 0.293311000  | -2.171521000 |
| C | 2.239583000  | 0.505252000  | 1.513578000  | H  | -5.036695000 | -0.182157000 | -3.054228000 |
| C | 3.597669000  | 0.809746000  | 1.610175000  | C  | -6.630702000 | -0.166548000 | -1.640982000 |
| H | 4.064133000  | 0.936402000  | 2.580055000  | H  | -7.147482000 | -1.004612000 | -2.101207000 |
| C | 4.325167000  | 0.939633000  | 0.418769000  | C  | -7.251260000 | 0.452062000  | -0.421541000 |
| H | 5.383541000  | 1.176712000  | 0.461044000  | H  | -7.367297000 | -0.312386000 | 0.369613000  |
| C | 3.705739000  | 0.761074000  | -0.826105000 | H  | -8.295116000 | 0.744869000  | -0.635644000 |
| H | 4.256141000  | 0.849496000  | -1.755382000 | C  | -6.487873000 | 1.628723000  | 0.115148000  |
| C | 2.343668000  | 0.459116000  | -0.837664000 | H  | -6.897734000 | 2.145157000  | 0.979131000  |
| C | 1.469031000  | 0.199634000  | -2.049112000 | C  | -5.317032000 | 2.054306000  | -0.449807000 |
| O | 1.966796000  | 0.246686000  | -3.188731000 | H  | -4.796090000 | 2.911783000  | -0.031279000 |

### III) Desaturation vs. Halogenation of the CHD-H radical

#### III-1) desaturation vs. halogenation by the oxidant 1<sub>F</sub>

|                  |              |              |              |   |              |              |             |
|------------------|--------------|--------------|--------------|---|--------------|--------------|-------------|
| <sup>3</sup> IM' |              |              |              | H | 0.590597000  | -3.156305000 | 2.630679000 |
| Ni               | -0.094611000 | -0.083869000 | -0.090362000 | H | -0.878357000 | -4.148217000 | 2.615035000 |
| N                | 0.145346000  | -0.376637000 | 1.977711000  | H | -0.526500000 | -3.035536000 | 1.278274000 |
| N                | 1.862990000  | 0.251165000  | 0.133588000  | C | -2.287247000 | -2.388393000 | 3.951472000 |
| N                | 0.486611000  | 0.331268000  | -2.066157000 | H | -2.553809000 | -3.432118000 | 4.101810000 |
| C                | -0.885062000 | -0.715770000 | 2.894721000  | C | -2.995576000 | -1.386139000 | 4.619115000 |
| C                | -1.230678000 | -2.072286000 | 3.085284000  | H | -3.812064000 | -1.645837000 | 5.287641000 |
| C                | -0.472925000 | -3.163262000 | 2.365902000  | C | -2.647945000 | -0.047705000 | 4.419957000 |

|   |              |              |              |                              |              |              |              |
|---|--------------|--------------|--------------|------------------------------|--------------|--------------|--------------|
| H | -3.196505000 | 0.737059000  | 4.936059000  | H                            | -8.141775000 | 1.423335000  | 1.079126000  |
| C | -1.596829000 | 0.306485000  | 3.561768000  | C                            | -6.195068000 | 2.182958000  | 1.413362000  |
| C | -1.229119000 | 1.756636000  | 3.353546000  | H                            | -6.445907000 | 3.225892000  | 1.582437000  |
| H | -1.282754000 | 2.033727000  | 2.294194000  | C                            | -4.947882000 | 1.816468000  | 0.977608000  |
| H | -0.203312000 | 1.961066000  | 3.680845000  | H                            | -4.181286000 | 2.560536000  | 0.792202000  |
| H | -1.900832000 | 2.413100000  | 3.914300000  | <sup>3</sup> TS <sub>2</sub> |              |              |              |
| C | 1.391301000  | -0.214617000 | 2.444391000  | Ni                           | -0.295350000 | 0.138652000  | 0.163654000  |
| O | 1.802883000  | -0.329320000 | 3.625283000  | N                            | 0.133752000  | -0.255591000 | 2.159910000  |
| C | 2.388216000  | 0.149367000  | 1.357380000  | N                            | 1.691013000  | 0.116731000  | 0.124391000  |
| C | 3.752792000  | 0.368652000  | 1.551874000  | N                            | 0.062374000  | 0.505057000  | -1.851989000 |
| H | 4.177372000  | 0.286369000  | 2.545333000  | C                            | -0.817462000 | -0.452751000 | 3.197432000  |
| C | 4.535096000  | 0.691218000  | 0.436453000  | C                            | -1.327929000 | -1.748163000 | 3.438638000  |
| H | 5.599789000  | 0.866754000  | 0.556996000  | C                            | -0.819132000 | -2.931322000 | 2.649493000  |
| C | 3.954066000  | 0.787414000  | -0.833711000 | H                            | 0.255426000  | -3.082885000 | 2.802639000  |
| H | 4.537229000  | 1.033312000  | -1.713172000 | H                            | -1.336934000 | -3.848075000 | 2.945564000  |
| C | 2.582753000  | 0.554774000  | -0.949712000 | H                            | -0.965956000 | -2.786532000 | 1.572724000  |
| C | 1.785325000  | 0.611835000  | -2.241611000 | C                            | -2.314909000 | -1.914886000 | 4.420984000  |
| O | 2.384103000  | 0.900967000  | -3.306858000 | H                            | -2.711347000 | -2.909826000 | 4.609338000  |
| C | -0.375512000 | 0.364945000  | -3.194819000 | C                            | -2.791841000 | -0.825373000 | 5.154138000  |
| C | -1.002688000 | 1.576408000  | -3.562508000 | H                            | -3.558785000 | -0.969142000 | 5.910266000  |
| C | -0.715033000 | 2.849130000  | -2.801342000 | C                            | -2.278370000 | 0.450499000  | 4.907890000  |
| H | -0.943297000 | 2.736252000  | -1.734942000 | H                            | -2.646449000 | 1.301364000  | 5.476330000  |
| H | -1.309288000 | 3.679875000  | -3.192929000 | C                            | -1.290167000 | 0.656365000  | 3.934208000  |
| H | 0.343043000  | 3.126966000  | -2.868797000 | C                            | -0.740036000 | 2.038885000  | 3.675021000  |
| C | -1.897730000 | 1.576548000  | -4.641876000 | H                            | -0.873135000 | 2.331895000  | 2.627175000  |
| H | -2.381271000 | 2.507863000  | -4.928106000 | H                            | 0.335365000  | 2.086323000  | 3.881045000  |
| C | -2.173958000 | 0.403250000  | -5.348536000 | H                            | -1.239187000 | 2.780804000  | 4.304770000  |
| H | -2.870297000 | 0.418167000  | -6.182711000 | C                            | 1.438999000  | -0.327514000 | 2.467843000  |
| C | -1.550730000 | -0.789590000 | -4.973789000 | O                            | 1.959729000  | -0.548538000 | 3.586450000  |
| H | -1.762884000 | -1.706238000 | -5.519412000 | C                            | 2.342766000  | -0.107002000 | 1.267425000  |
| C | -0.649856000 | -0.828018000 | -3.899737000 | C                            | 3.737939000  | -0.125301000 | 1.279887000  |
| C | 0.015867000  | -2.123674000 | -3.499615000 | H                            | 4.269946000  | -0.305898000 | 2.206366000  |
| H | 1.107091000  | -2.056029000 | -3.577018000 | C                            | 4.410513000  | 0.094015000  | 0.071195000  |
| H | -0.319298000 | -2.946834000 | -4.137320000 | H                            | 5.495968000  | 0.085160000  | 0.049966000  |
| H | -0.209555000 | -2.382930000 | -2.458409000 | C                            | 3.694818000  | 0.323924000  | -1.110398000 |
| F | -1.989343000 | -0.354924000 | -0.298481000 | H                            | 4.192805000  | 0.494882000  | -2.057403000 |
| C | -4.655223000 | 0.447812000  | 0.767805000  | C                            | 2.300953000  | 0.328467000  | -1.043804000 |
| H | -3.656243000 | 0.165042000  | 0.415156000  | C                            | 1.355036000  | 0.558131000  | -2.210080000 |
| C | -5.614173000 | -0.568483000 | 0.991890000  | O                            | 1.837777000  | 0.765656000  | -3.348668000 |
| H | -5.344264000 | -1.604040000 | 0.817196000  | C                            | -0.929096000 | 0.710119000  | -2.850268000 |
| C | -6.869505000 | -0.230727000 | 1.427567000  | C                            | -1.385586000 | 2.018071000  | -3.126146000 |
| H | -7.623800000 | -0.990886000 | 1.607326000  | C                            | -0.787623000 | 3.205771000  | -2.409546000 |
| C | -7.235202000 | 1.173828000  | 1.663913000  | H                            | -0.886369000 | 3.106647000  | -1.322209000 |
| H | -7.622280000 | 1.287873000  | 2.694926000  | H                            | -1.280532000 | 4.133232000  | -2.714945000 |



|                              |              |              |              |   |              |              |              |
|------------------------------|--------------|--------------|--------------|---|--------------|--------------|--------------|
| H                            | 0.283214000  | 3.305082000  | -2.620934000 | C | -0.799130000 | 2.003101000  | 3.621079000  |
| C                            | -2.404728000 | 2.194131000  | -4.072971000 | H | -0.934235000 | 2.298402000  | 2.574070000  |
| H                            | -2.758533000 | 3.199707000  | -4.288778000 | H | 0.274693000  | 2.066523000  | 3.830687000  |
| C                            | -2.967051000 | 1.101160000  | -4.737234000 | H | -1.311092000 | 2.734959000  | 4.251973000  |
| H                            | -3.756307000 | 1.252772000  | -5.468693000 | C | 1.434559000  | -0.325604000 | 2.464031000  |
| C                            | -2.508731000 | -0.187907000 | -4.454467000 | O | 1.907203000  | -0.539340000 | 3.596324000  |
| H                            | -2.942917000 | -1.042178000 | -4.968894000 | C | 2.369311000  | -0.079988000 | 1.294396000  |
| C                            | -1.491191000 | -0.402846000 | -3.513667000 | C | 3.764065000  | -0.057741000 | 1.318839000  |
| C                            | -1.003459000 | -1.800883000 | -3.214063000 | H | 4.299255000  | -0.228225000 | 2.245564000  |
| H                            | 0.063165000  | -1.911988000 | -3.440231000 | C | 4.435516000  | 0.191016000  | 0.113658000  |
| H                            | -1.553888000 | -2.539672000 | -3.803721000 | H | 5.520624000  | 0.215197000  | 0.100154000  |
| H                            | -1.126944000 | -2.048939000 | -2.153264000 | C | 3.724013000  | 0.408961000  | -1.074335000 |
| F                            | -2.260487000 | 0.304229000  | 0.158275000  | H | 4.228099000  | 0.602096000  | -2.013966000 |
| C                            | -3.914715000 | -0.093212000 | 1.197298000  | C | 2.330486000  | 0.370483000  | -1.015800000 |
| H                            | -3.257195000 | -0.237642000 | 2.044455000  | C | 1.358061000  | 0.573707000  | -2.163698000 |
| C                            | -4.395049000 | -1.253776000 | 0.499490000  | O | 1.796755000  | 0.799455000  | -3.307671000 |
| H                            | -3.902218000 | -2.204506000 | 0.670243000  | C | -0.941884000 | 0.638886000  | -2.783079000 |
| C                            | -5.442583000 | -1.148868000 | -0.354676000 | C | -1.485582000 | 1.918658000  | -3.023586000 |
| H                            | -5.809431000 | -2.022166000 | -0.886759000 | C | -0.983164000 | 3.124183000  | -2.264860000 |
| C                            | -6.142589000 | 0.139017000  | -0.584503000 | H | -1.098137000 | 2.991842000  | -1.182695000 |
| H                            | -7.225246000 | 0.009427000  | -0.419604000 | H | -1.530673000 | 4.023924000  | -2.559349000 |
| H                            | -6.091911000 | 0.395374000  | -1.657802000 | H | 0.082788000  | 3.300280000  | -2.449237000 |
| C                            | -5.646504000 | 1.284567000  | 0.217511000  | C | -2.503566000 | 2.049245000  | -3.979107000 |
| H                            | -6.166037000 | 2.233061000  | 0.113838000  | H | -2.926970000 | 3.032500000  | -4.169926000 |
| C                            | -4.597674000 | 1.164310000  | 1.068092000  | C | -2.975635000 | 0.939407000  | -4.683668000 |
| H                            | -4.254980000 | 2.005823000  | 1.659970000  | H | -3.765264000 | 1.055915000  | -5.421015000 |
| <sup>3</sup> PC <sub>F</sub> |              |              |              | C | -2.428960000 | -0.321531000 | -4.433947000 |
| Ni                           | -0.232386000 | 0.100380000  | 0.171240000  | H | -2.794591000 | -1.188477000 | -4.979141000 |
| N                            | 0.123222000  | -0.279667000 | 2.111977000  | C | -1.409751000 | -0.491947000 | -3.486187000 |
| N                            | 1.729114000  | 0.131765000  | 0.147232000  | C | -0.827654000 | -1.860109000 | -3.220137000 |
| N                            | 0.059602000  | 0.477323000  | -1.779174000 | H | 0.243636000  | -1.893321000 | -3.449285000 |
| C                            | -0.841586000 | -0.491145000 | 3.141493000  | H | -1.327135000 | -2.619412000 | -3.828375000 |
| C                            | -1.333374000 | -1.793873000 | 3.375079000  | H | -0.933344000 | -2.141251000 | -2.165811000 |
| C                            | -0.802896000 | -2.969793000 | 2.589584000  | F | -2.373193000 | 0.075318000  | -0.015908000 |
| H                            | 0.273653000  | -3.103362000 | 2.745186000  | C | -3.626002000 | -0.003855000 | 0.873309000  |
| H                            | -1.305778000 | -3.893891000 | 2.887759000  | H | -3.162865000 | -0.196097000 | 1.840737000  |
| H                            | -0.950699000 | -2.831148000 | 1.512218000  | C | -4.414777000 | -1.147651000 | 0.353432000  |
| C                            | -2.326383000 | -1.973713000 | 4.348799000  | H | -3.982636000 | -2.137803000 | 0.467470000  |
| H                            | -2.711502000 | -2.973645000 | 4.533118000  | C | -5.611828000 | -0.978459000 | -0.228338000 |
| C                            | -2.822526000 | -0.891106000 | 5.078754000  | H | -6.160956000 | -1.842916000 | -0.594297000 |
| H                            | -3.593718000 | -1.045788000 | 5.828291000  | C | -6.264397000 | 0.360159000  | -0.383748000 |
| C                            | -2.323837000 | 0.391629000  | 4.839706000  | H | -7.266950000 | 0.338605000  | 0.070499000  |
| H                            | -2.707717000 | 1.236513000  | 5.406271000  | H | -6.459699000 | 0.554076000  | -1.450365000 |
| C                            | -1.330565000 | 0.612269000  | 3.874715000  | C | -5.472871000 | 1.491535000  | 0.195406000  |

|                              |              |              |              |   |              |              |              |
|------------------------------|--------------|--------------|--------------|---|--------------|--------------|--------------|
| H                            | -5.917612000 | 2.482836000  | 0.147661000  | C | 2.452049000  | 0.204681000  | -0.867465000 |
| C                            | -4.275606000 | 1.326417000  | 0.777906000  | C | 1.646923000  | 0.297321000  | -2.151896000 |
| H                            | -3.740537000 | 2.169224000  | 1.206289000  | O | 2.237338000  | 0.378740000  | -3.244679000 |
| <sup>3</sup> PC <sub>H</sub> |              |              |              | C | -0.554598000 | 0.350367000  | -3.073782000 |
| Ni                           | -0.248348000 | 0.141718000  | -0.024041000 | C | -1.007260000 | 1.609876000  | -3.521406000 |
| N                            | -0.193709000 | -0.021672000 | 1.964342000  | C | -0.551832000 | 2.879142000  | -2.840939000 |
| N                            | 1.691145000  | 0.125564000  | 0.220836000  | H | -0.809634000 | 2.876171000  | -1.775343000 |
| N                            | 0.304777000  | 0.276552000  | -1.935813000 | H | -1.016528000 | 3.754886000  | -3.302412000 |
| C                            | -1.296334000 | -0.091858000 | 2.868995000  | H | 0.535686000  | 3.000561000  | -2.901778000 |
| C                            | -1.790526000 | -1.351482000 | 3.272402000  | C | -1.892009000 | 1.659636000  | -4.608171000 |
| C                            | -1.149177000 | -2.626791000 | 2.779065000  | H | -2.245141000 | 2.626430000  | -4.958864000 |
| H                            | -0.108818000 | -2.707576000 | 3.114143000  | C | -2.321452000 | 0.490401000  | -5.240063000 |
| H                            | -1.691724000 | -3.501452000 | 3.148297000  | H | -3.007786000 | 0.544705000  | -6.080721000 |
| H                            | -1.133130000 | -2.669439000 | 1.684027000  | C | -1.865992000 | -0.749151000 | -4.784918000 |
| C                            | -2.885608000 | -1.395283000 | 4.147225000  | H | -2.199024000 | -1.661735000 | -5.273449000 |
| H                            | -3.270478000 | -2.361367000 | 4.464659000  | C | -0.980766000 | -0.839780000 | -3.701233000 |
| C                            | -3.482676000 | -0.221202000 | 4.612555000  | C | -0.497647000 | -2.185125000 | -3.213187000 |
| H                            | -4.330376000 | -0.271541000 | 5.290335000  | H | 0.591915000  | -2.274170000 | -3.290907000 |
| C                            | -2.988614000 | 1.017625000  | 4.197699000  | H | -0.945637000 | -2.993396000 | -3.797908000 |
| H                            | -3.452347000 | 1.933587000  | 4.555634000  | H | -0.752642000 | -2.343338000 | -2.158756000 |
| C                            | -1.894145000 | 1.103052000  | 3.324973000  | F | -2.416770000 | 0.147125000  | -0.507374000 |
| C                            | -1.359566000 | 2.447558000  | 2.891121000  | C | -6.272339000 | -0.385843000 | -1.501408000 |
| H                            | -1.375996000 | 2.553252000  | 1.800128000  | H | -6.772472000 | -0.393557000 | -2.465623000 |
| H                            | -0.318564000 | 2.585730000  | 3.204825000  | C | -5.733862000 | -1.570045000 | -0.985828000 |
| H                            | -1.953660000 | 3.258167000  | 3.322059000  | H | -5.817357000 | -2.495695000 | -1.547554000 |
| C                            | 1.055078000  | -0.052676000 | 2.505148000  | C | -5.089314000 | -1.561264000 | 0.256490000  |
| O                            | 1.353123000  | -0.135226000 | 3.710445000  | H | -4.674949000 | -2.479587000 | 0.662312000  |
| C                            | 2.155794000  | 0.027758000  | 1.463028000  | C | -4.978417000 | -0.363781000 | 0.981981000  |
| C                            | 3.533935000  | 0.007305000  | 1.679796000  | H | -3.176858000 | -0.052519000 | 0.030800000  |
| H                            | 3.931303000  | -0.072187000 | 2.684845000  | H | -4.509790000 | -0.362793000 | 1.962795000  |
| C                            | 4.372693000  | 0.091167000  | 0.559260000  | C | -5.522082000 | 0.822005000  | 0.460778000  |
| H                            | 5.449477000  | 0.077501000  | 0.695078000  | H | -5.440888000 | 1.746795000  | 1.024456000  |
| C                            | 3.840829000  | 0.190913000  | -0.734386000 | C | -6.165736000 | 0.809909000  | -0.780669000 |
| H                            | 4.477245000  | 0.254883000  | -1.609186000 | H | -6.584037000 | 1.727143000  | -1.184583000 |

### III-2) desaturation vs. halogenation by AgF

|                  |             |              |             |   |             |              |              |
|------------------|-------------|--------------|-------------|---|-------------|--------------|--------------|
| <sup>2</sup> IM0 |             |              |             | C | 5.313748000 | 0.036851000  | -0.130347000 |
| Ag               | 3.229080000 | -0.185683000 | 0.917571000 | H | 5.077141000 | -0.597768000 | -0.981641000 |
| F                | 1.199998000 | -0.219785000 | 1.463482000 | C | 5.642328000 | 1.484452000  | -0.411144000 |
| C                | 6.189680000 | 0.223161000  | 2.160422000 | H | 4.798247000 | 1.998959000  | -0.892959000 |
| H                | 6.432731000 | -0.259075000 | 3.100653000 | H | 6.437123000 | 1.515520000  | -1.182194000 |
| C                | 5.650995000 | -0.550260000 | 1.086823000 | C | 6.103177000 | 2.241218000  | 0.801640000  |
| H                | 5.578065000 | -1.629636000 | 1.198880000 | H | 6.258236000 | 3.311383000  | 0.696436000  |

|                               |             |              |              |                               |             |              |              |
|-------------------------------|-------------|--------------|--------------|-------------------------------|-------------|--------------|--------------|
| C                             | 6.378544000 | 1.619100000  | 1.992957000  | C                             | 5.313748000 | 0.036851000  | -0.130347000 |
| H                             | 6.747839000 | 2.204368000  | 2.830897000  | H                             | 5.077141000 | -0.597768000 | -0.981641000 |
| <sup>2</sup> TS0 <sub>H</sub> |             |              |              | C                             | 5.642328000 | 1.484452000  | -0.411144000 |
| Ag                            | 3.029024000 | -0.757907000 | 0.852102000  | H                             | 4.798247000 | 1.998959000  | -0.892959000 |
| F                             | 2.733181000 | 1.690786000  | 0.038606000  | H                             | 6.437123000 | 1.515520000  | -1.182194000 |
| C                             | 6.445087000 | 0.246434000  | 2.205508000  | C                             | 6.103177000 | 2.241218000  | 0.801640000  |
| H                             | 6.909127000 | -0.121025000 | 3.115584000  | H                             | 6.258236000 | 3.311383000  | 0.696436000  |
| C                             | 5.898984000 | -0.650987000 | 1.287342000  | C                             | 6.378544000 | 1.619100000  | 1.992957000  |
| H                             | 5.978159000 | -1.721010000 | 1.463330000  | H                             | 6.747839000 | 2.204368000  | 2.830897000  |
| C                             | 5.292016000 | -0.195766000 | 0.095464000  | <sup>2</sup> TS0 <sub>F</sub> |             |              |              |
| H                             | 5.120571000 | -0.907638000 | -0.709907000 | Ag                            | 2.924634000 | 0.027509000  | -0.344287000 |
| C                             | 5.233755000 | 1.243510000  | -0.202638000 | F                             | 3.929657000 | 0.161231000  | 3.019953000  |
| H                             | 3.936913000 | 1.560657000  | -0.090422000 | C                             | 5.571766000 | 0.174054000  | 2.185890000  |
| H                             | 5.338603000 | 1.513032000  | -1.260436000 | H                             | 6.001392000 | -0.314570000 | 3.052740000  |
| C                             | 5.894092000 | 2.121454000  | 0.752782000  | C                             | 5.418391000 | -0.600386000 | 0.997908000  |
| H                             | 5.930332000 | 3.186330000  | 0.534205000  | H                             | 5.326830000 | -1.679079000 | 1.090301000  |
| C                             | 6.424813000 | 1.647782000  | 1.929367000  | C                             | 5.280306000 | -0.000352000 | -0.259439000 |
| H                             | 6.872279000 | 2.337150000  | 2.640589000  | H                             | 5.345888000 | -0.643828000 | -1.135014000 |
| <sup>3</sup> PC0 <sub>H</sub> |             |              |              | C                             | 5.755584000 | 1.426299000  | -0.450673000 |
| Ag                            | 2.255775000 | -0.437497000 | 3.243125000  | H                             | 5.159906000 | 1.967572000  | -1.192103000 |
| F                             | 2.805062000 | 1.473114000  | -0.254647000 | H                             | 6.771353000 | 1.385536000  | -0.890957000 |
| C                             | 6.126546000 | 0.146516000  | 2.089880000  | C                             | 5.840535000 | 2.202709000  | 0.831050000  |
| H                             | 6.210678000 | -0.306444000 | 3.073421000  | H                             | 6.012763000 | 3.273991000  | 0.755546000  |
| C                             | 6.035796000 | -0.665419000 | 0.952796000  | C                             | 5.791856000 | 1.612131000  | 2.042192000  |
| H                             | 6.049038000 | -1.746612000 | 1.054568000  | H                             | 5.906069000 | 2.199988000  | 2.948368000  |
| C                             | 5.927495000 | -0.083963000 | -0.314856000 | <sup>3</sup> PC0 <sub>F</sub> |             |              |              |
| H                             | 5.859619000 | -0.711552000 | -1.198699000 | Ag                            | 2.353240000 | 0.819870000  | -2.913921000 |
| C                             | 5.908129000 | 1.313274000  | -0.445731000 | F                             | 4.745205000 | 0.043893000  | 3.423140000  |
| H                             | 3.743318000 | 1.405957000  | -0.214017000 | C                             | 5.834157000 | 0.217856000  | 2.462749000  |
| H                             | 5.850284000 | 1.766168000  | -1.432180000 | H                             | 6.706947000 | -0.126391000 | 3.028286000  |
| C                             | 5.998139000 | 2.124970000  | 0.695517000  | C                             | 5.548485000 | -0.663751000 | 1.289863000  |
| H                             | 5.986123000 | 3.206314000  | 0.593734000  | H                             | 5.488714000 | -1.731093000 | 1.488373000  |
| C                             | 6.106459000 | 1.539984000  | 1.962566000  | C                             | 5.370973000 | -0.184300000 | 0.051264000  |
| H                             | 6.174473000 | 2.167994000  | 2.845999000  | H                             | 5.162924000 | -0.869037000 | -0.768280000 |
| <sup>3</sup> IM0              |             |              |              | C                             | 5.455567000 | 1.274290000  | -0.286858000 |
| Ag                            | 3.229080000 | -0.185683000 | 0.917571000  | H                             | 4.516193000 | 1.593035000  | -0.768673000 |
| F                             | 1.199998000 | -0.219785000 | 1.463482000  | H                             | 6.219882000 | 1.432621000  | -1.063481000 |
| C                             | 6.189680000 | 0.223161000  | 2.160422000  | C                             | 5.745658000 | 2.148998000  | 0.896021000  |
| H                             | 6.432731000 | -0.259075000 | 3.100653000  | H                             | 5.823469000 | 3.218613000  | 0.712459000  |
| C                             | 5.650995000 | -0.550260000 | 1.086823000  | C                             | 5.922643000 | 1.673982000  | 2.136615000  |
| H                             | 5.578065000 | -1.629636000 | 1.198880000  | H                             | 6.142875000 | 2.344219000  | 2.963921000  |

#### IV) The nature of the AgF-binding Ni(III)-F oxidant 1<sub>F-Ag-F</sub>

|    |              |              |              |    |              |              |              |
|----|--------------|--------------|--------------|----|--------------|--------------|--------------|
| 2  |              |              |              | C  | -0.795723000 | -0.215598000 | -5.221724000 |
| Ni | 1.263787000  | 0.851906000  | -0.773002000 | H  | -1.153492000 | -1.135181000 | -5.676994000 |
| N  | 1.304395000  | 0.800370000  | 1.105911000  | C  | 0.182559000  | -0.286519000 | -4.221369000 |
| N  | 3.106505000  | 0.789847000  | -0.617272000 | C  | 0.745752000  | -1.617636000 | -3.785168000 |
| N  | 1.621403000  | 0.876227000  | -2.619108000 | H  | 1.814939000  | -1.694106000 | -4.014749000 |
| C  | 0.157248000  | 0.762974000  | 1.950848000  | H  | 0.233770000  | -2.437588000 | -4.294980000 |
| C  | -0.334838000 | -0.486764000 | 2.387636000  | H  | 0.637429000  | -1.766260000 | -2.705314000 |
| C  | 0.346886000  | -1.775568000 | 1.995175000  | F  | -0.573023000 | 0.972385000  | -0.932821000 |
| H  | 1.358743000  | -1.836421000 | 2.412510000  | F  | -3.273667000 | -2.381849000 | -1.079953000 |
| H  | -0.218336000 | -2.636528000 | 2.360627000  | Ag | -1.936264000 | -0.759131000 | -1.006911000 |
| H  | 0.441222000  | -1.865361000 | 0.907531000  | 42 |              |              |              |
| C  | -1.470902000 | -0.498830000 | 3.207353000  | Ni | 1.034885000  | 0.869803000  | -0.899274000 |
| H  | -1.863139000 | -1.451614000 | 3.552710000  | N  | 1.361537000  | 0.459732000  | 1.320746000  |
| C  | -2.100669000 | 0.690677000  | 3.579787000  | N  | 2.996516000  | 1.111081000  | -0.640441000 |
| H  | -2.981982000 | 0.662467000  | 4.214293000  | N  | 1.583401000  | 0.913413000  | -2.809204000 |
| C  | -1.599177000 | 1.916309000  | 3.135444000  | C  | 0.316134000  | 0.489076000  | 2.181909000  |
| H  | -2.089671000 | 2.840876000  | 3.427875000  | C  | -0.641180000 | -0.603404000 | 2.096018000  |
| C  | -0.466461000 | 1.975977000  | 2.313761000  | C  | -0.416991000 | -1.752222000 | 1.153261000  |
| C  | 0.076750000  | 3.302737000  | 1.841528000  | H  | 0.616045000  | -2.108314000 | 1.190015000  |
| H  | 0.096593000  | 3.360292000  | 0.747896000  | H  | -1.084495000 | -2.580204000 | 1.402455000  |
| H  | 1.103702000  | 3.462995000  | 2.189313000  | H  | -0.623666000 | -1.456221000 | 0.118756000  |
| H  | -0.537956000 | 4.125508000  | 2.215439000  | C  | -1.721497000 | -0.608419000 | 2.963986000  |
| C  | 2.561725000  | 0.749304000  | 1.672979000  | H  | -2.418906000 | -1.439810000 | 2.943096000  |
| O  | 2.824822000  | 0.709916000  | 2.873192000  | C  | -1.920330000 | 0.439631000  | 3.875953000  |
| C  | 3.627330000  | 0.750314000  | 0.609748000  | H  | -2.782730000 | 0.422923000  | 4.535191000  |
| C  | 5.009936000  | 0.713926000  | 0.765792000  | C  | -1.022385000 | 1.520082000  | 3.935540000  |
| H  | 5.441734000  | 0.681308000  | 1.759307000  | H  | -1.221642000 | 2.337939000  | 4.621179000  |
| C  | 5.803544000  | 0.720255000  | -0.389170000 | C  | 0.097537000  | 1.577873000  | 3.121611000  |
| H  | 6.884035000  | 0.692537000  | -0.297972000 | C  | 0.982202000  | 2.795847000  | 3.163594000  |
| C  | 5.216239000  | 0.761656000  | -1.660820000 | H  | 1.300626000  | 3.103612000  | 2.163031000  |
| H  | 5.809993000  | 0.767289000  | -2.567429000 | H  | 1.886171000  | 2.608700000  | 3.751107000  |
| C  | 3.827008000  | 0.796460000  | -1.739362000 | H  | 0.445368000  | 3.630406000  | 3.620047000  |
| C  | 2.956693000  | 0.846611000  | -2.966724000 | C  | 2.659089000  | 0.751499000  | 1.706400000  |
| O  | 3.419785000  | 0.862638000  | -4.105476000 | O  | 3.091518000  | 0.632360000  | 2.854004000  |
| C  | 0.634415000  | 0.921053000  | -3.646389000 | C  | 3.576705000  | 1.080340000  | 0.562382000  |
| C  | 0.123436000  | 2.173919000  | -4.048775000 | C  | 4.946155000  | 1.307804000  | 0.701753000  |
| C  | 0.621100000  | 3.455059000  | -3.424543000 | H  | 5.402460000  | 1.281565000  | 1.684004000  |
| H  | 0.459631000  | 3.461372000  | -2.341137000 | C  | 5.692236000  | 1.558011000  | -0.454560000 |
| H  | 0.103634000  | 4.318000000  | -3.851324000 | H  | 6.758725000  | 1.743661000  | -0.380514000 |
| H  | 1.696243000  | 3.591273000  | -3.588551000 | C  | 5.069019000  | 1.550036000  | -1.706853000 |
| C  | -0.853385000 | 2.197443000  | -5.052188000 | H  | 5.622550000  | 1.714324000  | -2.623709000 |
| H  | -1.255413000 | 3.153534000  | -5.376623000 | C  | 3.695360000  | 1.312298000  | -1.762151000 |
| C  | -1.312139000 | 1.014185000  | -5.635699000 | C  | 2.885222000  | 1.203069000  | -3.039607000 |
| H  | -2.071735000 | 1.050527000  | -6.411459000 | O  | 3.450018000  | 1.353297000  | -4.137819000 |

|            |              |              |              |    |              |              |              |
|------------|--------------|--------------|--------------|----|--------------|--------------|--------------|
| C          | 0.713897000  | 0.705833000  | -3.919123000 | C  | 0.297122000  | 1.685689000  | 3.242316000  |
| C          | 0.104201000  | 1.809666000  | -4.553938000 | C  | 1.398880000  | 2.711287000  | 3.320880000  |
| C          | 0.395227000  | 3.220149000  | -4.100171000 | H  | 1.747842000  | 3.015237000  | 2.329473000  |
| H          | 0.166867000  | 3.352652000  | -3.036320000 | H  | 2.263621000  | 2.320748000  | 3.865337000  |
| H          | -0.198599000 | 3.940618000  | -4.669312000 | H  | 1.040565000  | 3.602148000  | 3.841573000  |
| H          | 1.453262000  | 3.473041000  | -4.232515000 | C  | 2.592155000  | 0.496551000  | 1.647899000  |
| C          | -0.780546000 | 1.567695000  | -5.614064000 | O  | 2.983940000  | 0.211825000  | 2.783848000  |
| H          | -1.253834000 | 2.411358000  | -6.110360000 | C  | 3.515063000  | 0.729688000  | 0.505311000  |
| C          | -1.060477000 | 0.265810000  | -6.036231000 | C  | 4.882347000  | 0.819087000  | 0.661412000  |
| H          | -1.749383000 | 0.095455000  | -6.858973000 | H  | 5.321341000  | 0.699186000  | 1.645131000  |
| C          | -0.453826000 | -0.816127000 | -5.394298000 | C  | 5.682583000  | 1.084719000  | -0.489580000 |
| H          | -0.670598000 | -1.830778000 | -5.719274000 | H  | 6.759812000  | 1.167402000  | -0.393041000 |
| C          | 0.437736000  | -0.616094000 | -4.331187000 | C  | 5.073414000  | 1.240141000  | -1.720747000 |
| C          | 1.087760000  | -1.790819000 | -3.639173000 | H  | 5.654278000  | 1.448324000  | -2.613612000 |
| H          | 2.180796000  | -1.742901000 | -3.703473000 | C  | 3.667657000  | 1.122810000  | -1.838990000 |
| H          | 0.762533000  | -2.733477000 | -4.087799000 | C  | 2.937848000  | 1.257139000  | -3.061094000 |
| H          | 0.836320000  | -1.815644000 | -2.572116000 | O  | 3.418453000  | 1.584707000  | -4.176239000 |
| F          | -0.886866000 | 0.956339000  | -0.914161000 | C  | 0.750546000  | 0.714069000  | -3.965804000 |
| F          | -5.059771000 | 0.516949000  | -0.067103000 | C  | -0.471075000 | 1.435000000  | -4.238497000 |
| Ag         | -3.009938000 | 0.728543000  | -0.479343000 | C  | -0.800255000 | 2.697344000  | -3.488643000 |
| $\delta^2$ |              |              |              | H  | -0.909348000 | 2.502308000  | -2.418118000 |
| Ni         | 0.969396000  | 0.877289000  | -0.861122000 | H  | -1.731148000 | 3.129434000  | -3.864390000 |
| N          | 1.237519000  | 0.507226000  | 1.292436000  | H  | -0.004571000 | 3.441034000  | -3.609371000 |
| N          | 2.910456000  | 0.867805000  | -0.705942000 | C  | -1.272892000 | 1.016202000  | -5.294843000 |
| N          | 1.508121000  | 1.123685000  | -2.907809000 | H  | -2.172392000 | 1.576593000  | -5.530836000 |
| C          | 0.260796000  | 0.652578000  | 2.223573000  | C  | -0.927284000 | -0.097941000 | -6.068430000 |
| C          | -0.879486000 | -0.239845000 | 2.132291000  | H  | -1.574372000 | -0.416861000 | -6.880176000 |
| C          | -0.881225000 | -1.382921000 | 1.155046000  | C  | 0.250761000  | -0.807971000 | -5.796836000 |
| H          | 0.005339000  | -2.013225000 | 1.280841000  | H  | 0.488100000  | -1.691429000 | -6.382134000 |
| H          | -1.769055000 | -2.001467000 | 1.305799000  | C  | 1.114525000  | -0.424972000 | -4.777248000 |
| H          | -0.885569000 | -1.016281000 | 0.124813000  | C  | 2.316227000  | -1.285566000 | -4.468428000 |
| C          | -1.913817000 | -0.093713000 | 3.045695000  | H  | 3.241517000  | -0.822899000 | -4.822637000 |
| H          | -2.752565000 | -0.782214000 | 3.016003000  | H  | 2.213050000  | -2.257445000 | -4.956710000 |
| C          | -1.881833000 | 0.915409000  | 4.018295000  | H  | 2.427155000  | -1.457576000 | -3.393489000 |
| H          | -2.710378000 | 1.023636000  | 4.712291000  | F  | -0.944365000 | 1.088525000  | -0.836792000 |
| C          | -0.789235000 | 1.794182000  | 4.099039000  | F  | -5.141387000 | 1.353132000  | 0.038530000  |
| H          | -0.802019000 | 2.591489000  | 4.836438000  | Ag | -3.091142000 | 1.223871000  | -0.389064000 |

### V) C-H bond activation of CHD by the proximal fluorine of 1<sub>F</sub>-Ag-F

|                   |             |              |              |   |             |              |              |
|-------------------|-------------|--------------|--------------|---|-------------|--------------|--------------|
| ${}^3\text{RC}_p$ |             |              |              | N | 2.210737000 | -0.098082000 | -2.471669000 |
| Ni                | 1.881347000 | -0.025742000 | -0.622509000 | C | 0.811513000 | 0.101432000  | 2.112713000  |
| N                 | 1.943776000 | -0.020095000 | 1.255436000  | C | 0.166744000 | -1.067728000 | 2.570612000  |
| N                 | 3.716828000 | -0.206616000 | -0.487709000 | C | 0.671349000 | -2.437550000 | 2.185625000  |

|   |              |              |              |                               |              |              |              |
|---|--------------|--------------|--------------|-------------------------------|--------------|--------------|--------------|
| H | 1.686700000  | -2.610951000 | 2.560494000  | F                             | -3.048541000 | -2.760494000 | -1.155541000 |
| H | 0.023872000  | -3.215958000 | 2.597000000  | Ag                            | -1.522935000 | -1.324722000 | -0.959816000 |
| H | 0.704969000  | -2.561370000 | 1.097579000  | H                             | -3.398372000 | 4.709129000  | -4.026926000 |
| C | -0.950577000 | -0.922466000 | 3.403296000  | C                             | -4.071918000 | 4.516433000  | -3.176599000 |
| H | -1.458011000 | -1.811883000 | 3.767116000  | H                             | -4.789281000 | 5.352235000  | -3.203923000 |
| C | -1.415876000 | 0.343310000  | 3.766342000  | C                             | -4.798321000 | 3.211071000  | -3.384299000 |
| H | -2.284780000 | 0.437829000  | 4.411464000  | H                             | -5.380249000 | 3.112897000  | -4.299473000 |
| C | -0.765718000 | 1.487952000  | 3.299286000  | C                             | -4.759415000 | 2.194933000  | -2.512517000 |
| H | -1.128757000 | 2.472048000  | 3.583554000  | H                             | -5.309651000 | 1.280186000  | -2.727255000 |
| C | 0.354787000  | 1.389874000  | 2.464562000  | C                             | -3.983864000 | 2.234656000  | -1.220012000 |
| C | 1.054843000  | 2.629547000  | 1.962489000  | H                             | -3.270589000 | 1.394899000  | -1.185496000 |
| H | 1.051018000  | 2.675888000  | 0.867736000  | H                             | -4.661249000 | 2.048480000  | -0.371256000 |
| H | 2.103194000  | 2.657496000  | 2.280518000  | C                             | -3.252267000 | 3.537205000  | -1.015317000 |
| H | 0.563862000  | 3.529094000  | 2.342333000  | H                             | -2.667538000 | 3.633970000  | -0.101882000 |
| C | 3.202282000  | -0.136862000 | 1.809382000  | C                             | -3.291405000 | 4.553737000  | -1.886626000 |
| O | 3.479613000  | -0.148628000 | 3.006989000  | H                             | -2.738002000 | 5.467026000  | -1.673289000 |
| C | 4.250237000  | -0.248330000 | 0.733905000  | <sup>2</sup> TS <sub>pH</sub> |              |              |              |
| C | 5.628596000  | -0.381558000 | 0.874385000  | Ni                            | 1.622828000  | 0.352584000  | -0.814303000 |
| H | 6.071126000  | -0.415807000 | 1.863112000  | N                             | 1.544535000  | 0.134729000  | 1.166000000  |
| C | 6.404039000  | -0.468811000 | -0.289655000 | N                             | 3.456307000  | -0.197210000 | -0.502416000 |
| H | 7.480783000  | -0.573312000 | -0.210455000 | N                             | 2.248000000  | 0.331198000  | -2.697766000 |
| C | 5.803383000  | -0.425108000 | -1.554987000 | C                             | 0.402547000  | 0.336399000  | 1.992145000  |
| H | 6.382854000  | -0.494304000 | -2.468204000 | C                             | -0.443626000 | -0.755263000 | 2.287715000  |
| C | 4.419451000  | -0.291034000 | -1.618026000 | C                             | -0.119746000 | -2.140372000 | 1.781257000  |
| C | 3.535625000  | -0.231049000 | -2.835312000 | H                             | 0.833621000  | -2.500490000 | 2.184744000  |
| O | 3.980446000  | -0.294158000 | -3.979607000 | H                             | -0.898946000 | -2.851010000 | 2.069700000  |
| C | 1.209768000  | -0.060095000 | -3.485314000 | H                             | -0.028239000 | -2.156363000 | 0.689471000  |
| C | 0.746665000  | 1.192121000  | -3.943171000 | C                             | -1.585467000 | -0.527218000 | 3.068371000  |
| C | 1.307186000  | 2.478575000  | -3.387222000 | H                             | -2.241048000 | -1.362229000 | 3.303038000  |
| H | 1.160903000  | 2.541015000  | -2.303342000 | C                             | -1.887531000 | 0.750668000  | 3.545495000  |
| H | 0.820669000  | 3.342067000  | -3.847819000 | H                             | -2.776001000 | 0.911264000  | 4.150051000  |
| H | 2.384776000  | 2.560114000  | -3.570319000 | C                             | -1.041812000 | 1.821095000  | 3.243692000  |
| C | -0.242479000 | 1.208367000  | -4.934538000 | H                             | -1.273151000 | 2.816193000  | 3.615741000  |
| H | -0.607276000 | 2.163703000  | -5.302106000 | C                             | 0.110167000  | 1.633925000  | 2.467176000  |
| C | -0.761140000 | 0.018684000  | -5.451113000 | C                             | 1.024540000  | 2.793855000  | 2.152666000  |
| H | -1.530211000 | 0.049467000  | -6.217718000 | H                             | 1.133527000  | 2.936457000  | 1.071373000  |
| C | -0.294576000 | -1.210416000 | -4.979992000 | H                             | 2.032023000  | 2.629717000  | 2.551757000  |
| H | -0.701236000 | -2.134967000 | -5.380894000 | H                             | 0.636781000  | 3.721154000  | 2.583384000  |
| C | 0.695136000  | -1.274304000 | -3.990408000 | C                             | 2.712147000  | -0.237995000 | 1.755786000  |
| C | 1.201959000  | -2.605832000 | -3.490394000 | O                             | 2.922309000  | -0.420976000 | 2.967318000  |
| H | 2.261267000  | -2.748367000 | -3.733770000 | C                             | 3.831560000  | -0.434862000 | 0.752444000  |
| H | 0.640407000  | -3.426016000 | -3.944600000 | C                             | 5.143144000  | -0.830084000 | 1.013927000  |
| H | 1.107641000  | -2.689041000 | -2.402131000 | H                             | 5.462241000  | -1.026926000 | 2.030755000  |
| F | 0.052129000  | 0.201299000  | -0.748737000 | C                             | 6.017188000  | -0.962479000 | -0.073890000 |

|                              |              |              |              |   |              |              |              |
|------------------------------|--------------|--------------|--------------|---|--------------|--------------|--------------|
| H                            | 7.044280000  | -1.268228000 | 0.097963000  | N | 2.190678000  | 0.209623000  | -2.637418000 |
| C                            | 5.580441000  | -0.709013000 | -1.381470000 | C | 0.419262000  | 0.129778000  | 1.932776000  |
| H                            | 6.240667000  | -0.811076000 | -2.234820000 | C | -0.376004000 | -1.026422000 | 2.093043000  |
| C                            | 4.253944000  | -0.318324000 | -1.561073000 | C | 0.045893000  | -2.347205000 | 1.493819000  |
| C                            | 3.555973000  | -0.006104000 | -2.869757000 | H | 1.038240000  | -2.647049000 | 1.848443000  |
| O                            | 4.180802000  | -0.077925000 | -3.941323000 | H | -0.663709000 | -3.135644000 | 1.758938000  |
| C                            | 1.473815000  | 0.637537000  | -3.854020000 | H | 0.103198000  | -2.296450000 | 0.400821000  |
| C                            | 1.411335000  | 1.970145000  | -4.317215000 | C | -1.560086000 | -0.928629000 | 2.837482000  |
| C                            | 2.186193000  | 3.065363000  | -3.624064000 | H | -2.177498000 | -1.813773000 | 2.968225000  |
| H                            | 1.914186000  | 3.139401000  | -2.564875000 | C | -1.949076000 | 0.282479000  | 3.413806000  |
| H                            | 1.994675000  | 4.033366000  | -4.095224000 | H | -2.869412000 | 0.341817000  | 3.988294000  |
| H                            | 3.265623000  | 2.878738000  | -3.660594000 | C | -1.150039000 | 1.416691000  | 3.252134000  |
| C                            | 0.617401000  | 2.254846000  | -5.436934000 | H | -1.449818000 | 2.359560000  | 3.702860000  |
| H                            | 0.565245000  | 3.277648000  | -5.802102000 | C | 0.040031000  | 1.361443000  | 2.512702000  |
| C                            | -0.101398000 | 1.246883000  | -6.083979000 | C | 0.899567000  | 2.592763000  | 2.349460000  |
| H                            | -0.712788000 | 1.483413000  | -6.950537000 | H | 1.119590000  | 2.793325000  | 1.294944000  |
| C                            | -0.033447000 | -0.065866000 | -5.611241000 | H | 1.863437000  | 2.472733000  | 2.857049000  |
| H                            | -0.592644000 | -0.852193000 | -6.112309000 | H | 0.402624000  | 3.470757000  | 2.770995000  |
| C                            | 0.749284000  | -0.391288000 | -4.494887000 | C | 2.804204000  | -0.043411000 | 1.762842000  |
| C                            | 0.820104000  | -1.813064000 | -3.991240000 | O | 3.038617000  | -0.115719000 | 2.983875000  |
| H                            | 1.843509000  | -2.203225000 | -4.033075000 | C | 3.924970000  | -0.063617000 | 0.753357000  |
| H                            | 0.183086000  | -2.468874000 | -4.590915000 | C | 5.292018000  | -0.163586000 | 0.996739000  |
| H                            | 0.496982000  | -1.884341000 | -2.946399000 | H | 5.651330000  | -0.239473000 | 2.016373000  |
| F                            | -0.230660000 | 0.981200000  | -1.124905000 | C | 6.163395000  | -0.161487000 | -0.099709000 |
| F                            | -2.557280000 | -2.837101000 | -1.536460000 | H | 7.233610000  | -0.237785000 | 0.062611000  |
| Ag                           | -3.168466000 | -0.885837000 | -1.065763000 | C | 5.663152000  | -0.062426000 | -1.404128000 |
| H                            | -4.908333000 | 0.914781000  | -3.029823000 | H | 6.313782000  | -0.059038000 | -2.270863000 |
| C                            | -4.778502000 | 1.688695000  | -2.255874000 | C | 4.285123000  | 0.033984000  | -1.576761000 |
| H                            | -5.767659000 | 2.176821000  | -2.221061000 | C | 3.519618000  | 0.148033000  | -2.871861000 |
| C                            | -4.503889000 | 1.069667000  | -0.910743000 | O | 4.112012000  | 0.173421000  | -3.967373000 |
| H                            | -5.318140000 | 0.525719000  | -0.435884000 | C | 1.291096000  | 0.344475000  | -3.735424000 |
| C                            | -3.383854000 | 1.389643000  | -0.179003000 | C | 1.020099000  | 1.627056000  | -4.260016000 |
| H                            | -3.294230000 | 1.057831000  | 0.853338000  | C | 1.702372000  | 2.851879000  | -3.698758000 |
| C                            | -2.355829000 | 2.306966000  | -0.697641000 | H | 1.559302000  | 2.929060000  | -2.615200000 |
| H                            | -1.273055000 | 1.607452000  | -0.935486000 | H | 1.311408000  | 3.761113000  | -4.163553000 |
| H                            | -1.852361000 | 2.904385000  | 0.070154000  | H | 2.784027000  | 2.820904000  | -3.873492000 |
| C                            | -2.655584000 | 2.989422000  | -1.944810000 | C | 0.109928000  | 1.739158000  | -5.320266000 |
| H                            | -1.961249000 | 3.749857000  | -2.291456000 | H | -0.103931000 | 2.721972000  | -5.733069000 |
| C                            | -3.750757000 | 2.683366000  | -2.692982000 | C | -0.520994000 | 0.610198000  | -5.847874000 |
| H                            | -3.927075000 | 3.198635000  | -3.633161000 | H | -1.225198000 | 0.713477000  | -6.668917000 |
| <sup>2</sup> IM <sub>p</sub> |              |              |              | C | -0.244702000 | -0.651806000 | -5.316934000 |
| Ni                           | 1.680569000  | 0.146407000  | -0.780452000 | H | -0.733610000 | -1.531551000 | -5.727830000 |
| N                            | 1.605855000  | 0.056801000  | 1.146003000  | C | 0.660713000  | -0.805732000 | -4.257698000 |
| N                            | 3.481192000  | 0.030540000  | -0.506213000 | C | 0.962296000  | -2.175402000 | -3.696844000 |

|                              |              |              |              |    |              |              |              |
|------------------------------|--------------|--------------|--------------|----|--------------|--------------|--------------|
| H                            | 2.028485000  | -2.415108000 | -3.777789000 | C  | 4.082821000  | -0.210082000 | 0.644021000  |
| H                            | 0.398932000  | -2.944975000 | -4.231463000 | C  | 5.435712000  | -0.477574000 | 0.858866000  |
| H                            | 0.703834000  | -2.241419000 | -2.633854000 | H  | 5.821391000  | -0.494136000 | 1.871179000  |
| F                            | -0.321134000 | 0.159044000  | -1.121327000 | C  | 6.252276000  | -0.720776000 | -0.249675000 |
| F                            | -3.591844000 | -2.387100000 | -2.101811000 | H  | 7.307625000  | -0.931828000 | -0.111167000 |
| Ag                           | -3.824569000 | -0.383338000 | -1.523720000 | C  | 5.708848000  | -0.699205000 | -1.538221000 |
| H                            | -4.544374000 | 2.105525000  | -3.398673000 | H  | 6.310779000  | -0.891607000 | -2.418136000 |
| C                            | -4.295844000 | 2.673713000  | -2.488746000 | C  | 4.347618000  | -0.425599000 | -1.671405000 |
| H                            | -5.032119000 | 3.498933000  | -2.497986000 | C  | 3.629397000  | -0.400383000 | -2.990625000 |
| C                            | -4.525103000 | 1.845095000  | -1.248270000 | O  | 4.246437000  | -0.524433000 | -4.050589000 |
| H                            | -5.548458000 | 1.552616000  | -1.022031000 | C  | 1.411065000  | -0.410197000 | -3.900231000 |
| C                            | -3.549685000 | 1.727141000  | -0.270157000 | C  | 0.461132000  | 0.619654000  | -4.288168000 |
| H                            | -3.794340000 | 1.269101000  | 0.685184000  | C  | 0.522398000  | 1.990029000  | -3.675842000 |
| C                            | -2.254023000 | 2.332506000  | -0.431560000 | H  | 0.204804000  | 1.955997000  | -2.628650000 |
| H                            | -0.883272000 | 0.901213000  | -0.896939000 | H  | -0.136755000 | 2.674888000  | -4.214104000 |
| H                            | -1.569275000 | 2.334460000  | 0.412580000  | H  | 1.539857000  | 2.392198000  | -3.700005000 |
| C                            | -1.978447000 | 3.095338000  | -1.595404000 | C  | -0.437272000 | 0.342757000  | -5.307987000 |
| H                            | -1.007677000 | 3.572426000  | -1.696709000 | H  | -1.121811000 | 1.117280000  | -5.639165000 |
| C                            | -2.914199000 | 3.245324000  | -2.590532000 | C  | -0.462446000 | -0.915309000 | -5.926879000 |
| H                            | -2.677774000 | 3.831347000  | -3.473749000 | H  | -1.184233000 | -1.114476000 | -6.713082000 |
| <sup>4</sup> RC <sub>p</sub> |              |              |              | C  | 0.431464000  | -1.926691000 | -5.533254000 |
| Ni                           | 1.639582000  | 0.233525000  | -0.739996000 | H  | 0.366693000  | -2.904102000 | -6.001499000 |
| N                            | 1.834498000  | 0.263191000  | 1.276467000  | C  | 1.378454000  | -1.712261000 | -4.544368000 |
| N                            | 3.586768000  | -0.186269000 | -0.598345000 | C  | 2.264013000  | -2.848936000 | -4.105290000 |
| N                            | 2.278359000  | -0.113331000 | -2.900662000 | H  | 3.260857000  | -2.767741000 | -4.549495000 |
| C                            | 0.768379000  | 0.495684000  | 2.189524000  | H  | 1.829832000  | -3.801794000 | -4.416036000 |
| C                            | -0.016788000 | -0.592676000 | 2.629435000  | H  | 2.390452000  | -2.871685000 | -3.018724000 |
| C                            | 0.294215000  | -1.999090000 | 2.175064000  | F  | -0.256070000 | 0.512026000  | -0.973322000 |
| H                            | 1.308811000  | -2.299711000 | 2.459858000  | F  | -2.785918000 | -2.751474000 | -2.070510000 |
| H                            | -0.407644000 | -2.713127000 | 2.614854000  | Ag | -1.545783000 | -1.151506000 | -1.522549000 |
| H                            | 0.231554000  | -2.088767000 | 1.083673000  | H  | -2.867079000 | 5.456638000  | -2.032188000 |
| C                            | -1.091688000 | -0.341696000 | 3.493567000  | C  | -3.838397000 | 4.984825000  | -1.813465000 |
| H                            | -1.699573000 | -1.174783000 | 3.838198000  | H  | -4.553152000 | 5.823280000  | -1.813025000 |
| C                            | -1.388738000 | 0.957276000  | 3.913113000  | C  | -4.192931000 | 4.010497000  | -2.908775000 |
| H                            | -2.225598000 | 1.136495000  | 4.582620000  | H  | -4.236562000 | 4.405557000  | -3.922628000 |
| C                            | -0.607152000 | 2.025235000  | 3.465624000  | C  | -4.450837000 | 2.714122000  | -2.691826000 |
| H                            | -0.837327000 | 3.037623000  | 3.788762000  | H  | -4.701874000 | 2.067704000  | -3.531417000 |
| C                            | 0.475601000  | 1.814468000  | 2.600399000  | C  | -4.417278000 | 2.074124000  | -1.326793000 |
| C                            | 1.312754000  | 2.974579000  | 2.116178000  | H  | -3.707210000 | 1.230866000  | -1.325658000 |
| H                            | 1.315658000  | 3.035548000  | 1.021521000  | H  | -5.391165000 | 1.607587000  | -1.108380000 |
| H                            | 2.357917000  | 2.874336000  | 2.430313000  | C  | -4.058390000 | 3.047277000  | -0.232259000 |
| H                            | 0.930000000  | 3.920538000  | 2.509279000  | H  | -4.012749000 | 2.651838000  | 0.781204000  |
| C                            | 3.072771000  | 0.050315000  | 1.746959000  | C  | -3.800455000 | 4.343612000  | -0.448906000 |
| O                            | 3.458245000  | 0.035207000  | 2.936025000  | H  | -3.547922000 | 4.989557000  | 0.390580000  |



|                               |              |              |              |                              |              |              |              |
|-------------------------------|--------------|--------------|--------------|------------------------------|--------------|--------------|--------------|
| <sup>4</sup> TS <sub>pH</sub> |              |              |              | C                            | -0.043708000 | -0.740522000 | -5.737718000 |
| Ni                            | 1.398367000  | 0.180934000  | -0.815595000 | H                            | -0.394841000 | -1.615886000 | -6.279137000 |
| N                             | 1.474469000  | 0.202903000  | 1.244626000  | C                            | 0.797405000  | -0.917563000 | -4.629612000 |
| N                             | 3.322922000  | -0.180256000 | -0.523662000 | C                            | 1.216896000  | -2.303481000 | -4.200789000 |
| N                             | 2.054640000  | 0.078249000  | -2.765369000 | H                            | 2.294628000  | -2.450341000 | -4.335834000 |
| C                             | 0.389477000  | 0.486636000  | 2.120563000  | H                            | 0.694117000  | -3.066192000 | -4.784666000 |
| C                             | -0.455896000 | -0.559242000 | 2.551871000  | H                            | 1.003690000  | -2.477090000 | -3.139904000 |
| C                             | -0.172831000 | -1.988666000 | 2.155523000  | F                            | -0.643773000 | 0.242102000  | -1.137525000 |
| H                             | 0.805976000  | -2.318587000 | 2.521927000  | F                            | -2.781987000 | -3.430261000 | -2.105136000 |
| H                             | -0.932303000 | -2.662779000 | 2.561383000  | Ag                           | -1.710893000 | -1.670324000 | -1.666768000 |
| H                             | -0.156908000 | -2.107650000 | 1.065906000  | H                            | -3.994745000 | 2.460021000  | -3.574053000 |
| C                             | -1.557104000 | -0.248170000 | 3.363061000  | C                            | -4.084008000 | 2.840927000  | -2.537435000 |
| H                             | -2.211301000 | -1.050065000 | 3.696962000  | H                            | -4.942085000 | 3.531852000  | -2.625374000 |
| C                             | -1.819695000 | 1.068839000  | 3.746583000  | C                            | -4.429013000 | 1.717648000  | -1.624509000 |
| H                             | -2.677150000 | 1.294777000  | 4.374549000  | H                            | -5.356542000 | 1.182888000  | -1.807030000 |
| C                             | -0.972040000 | 2.094545000  | 3.319209000  | C                            | -3.627620000 | 1.371646000  | -0.575492000 |
| H                             | -1.169979000 | 3.121062000  | 3.618645000  | H                            | -3.905919000 | 0.550935000  | 0.078830000  |
| C                             | 0.137897000  | 1.822470000  | 2.506020000  | C                            | -2.363438000 | 2.050817000  | -0.336285000 |
| C                             | 1.048112000  | 2.938203000  | 2.049566000  | H                            | -1.513456000 | 1.207401000  | -0.727947000 |
| H                             | 1.116924000  | 2.977053000  | 0.956069000  | H                            | -2.004350000 | 2.055292000  | 0.700297000  |
| H                             | 2.068781000  | 2.800402000  | 2.424203000  | C                            | -2.066302000 | 3.235728000  | -1.127279000 |
| H                             | 0.684566000  | 3.906575000  | 2.404762000  | H                            | -1.176455000 | 3.809188000  | -0.885757000 |
| C                             | 2.686748000  | -0.028660000 | 1.780439000  | C                            | -2.854611000 | 3.599644000  | -2.178485000 |
| O                             | 3.001794000  | -0.060193000 | 2.991679000  | H                            | -2.606465000 | 4.472443000  | -2.775362000 |
| C                             | 3.761608000  | -0.264361000 | 0.732963000  | <sup>4</sup> IM <sub>p</sub> |              |              |              |
| C                             | 5.108341000  | -0.534909000 | 0.977180000  | Ni                           | 1.549475000  | 0.214078000  | -0.784146000 |
| H                             | 5.473136000  | -0.605515000 | 1.995076000  | N                            | 1.539648000  | 0.208409000  | 1.198735000  |
| C                             | 5.954974000  | -0.706575000 | -0.125863000 | N                            | 3.438960000  | -0.172468000 | -0.486128000 |
| H                             | 7.007804000  | -0.918328000 | 0.033192000  | N                            | 2.132029000  | 0.115057000  | -2.675703000 |
| C                             | 5.458296000  | -0.605094000 | -1.431901000 | C                            | 0.427164000  | 0.460083000  | 2.058280000  |
| H                             | 6.096867000  | -0.731053000 | -2.298208000 | C                            | -0.461319000 | -0.592304000 | 2.366438000  |
| C                             | 4.099432000  | -0.333882000 | -1.596809000 | C                            | -0.219057000 | -1.986928000 | 1.839459000  |
| C                             | 3.366844000  | -0.179352000 | -2.918857000 | H                            | 0.752137000  | -2.377048000 | 2.164026000  |
| O                             | 4.012680000  | -0.290128000 | -3.985369000 | H                            | -0.995099000 | -2.673412000 | 2.188887000  |
| C                             | 1.248560000  | 0.223882000  | -3.929085000 | H                            | -0.215383000 | -2.007015000 | 0.742757000  |
| C                             | 0.863314000  | 1.519342000  | -4.339379000 | C                            | -1.572845000 | -0.318828000 | 3.176817000  |
| C                             | 1.359884000  | 2.737949000  | -3.597501000 | H                            | -2.260607000 | -1.124937000 | 3.420514000  |
| H                             | 1.039078000  | 2.729033000  | -2.548999000 | C                            | -1.802722000 | 0.966174000  | 3.672782000  |
| H                             | 0.982876000  | 3.654835000  | -4.059597000 | H                            | -2.668187000 | 1.162794000  | 4.299592000  |
| H                             | 2.454751000  | 2.784798000  | -3.589586000 | C                            | -0.915429000 | 1.998175000  | 3.358145000  |
| C                             | 0.021522000  | 1.656024000  | -5.452463000 | H                            | -1.091674000 | 3.000172000  | 3.741844000  |
| H                             | -0.273995000 | 2.652183000  | -5.773508000 | C                            | 0.207198000  | 1.765035000  | 2.551018000  |
| C                             | -0.433558000 | 0.535513000  | -6.151361000 | C                            | 1.159605000  | 2.888623000  | 2.216694000  |
| H                             | -1.086166000 | 0.655471000  | -7.011902000 | H                            | 1.264860000  | 3.015628000  | 1.133001000  |

|    |              |              |              |                               |              |              |              |
|----|--------------|--------------|--------------|-------------------------------|--------------|--------------|--------------|
| H  | 2.163141000  | 2.693912000  | 2.611602000  | C                             | -2.312464000 | 3.372239000  | -1.422720000 |
| H  | 0.807754000  | 3.833684000  | 2.639562000  | H                             | -1.473609000 | 4.063008000  | -1.403143000 |
| C  | 2.743268000  | -0.049143000 | 1.782826000  | C                             | -3.150390000 | 3.348977000  | -2.504306000 |
| O  | 2.992014000  | -0.113115000 | 2.999523000  | H                             | -2.979718000 | 4.019171000  | -3.342355000 |
| C  | 3.855322000  | -0.271317000 | 0.772606000  | <sup>3</sup> IM' <sub>p</sub> |              |              |              |
| C  | 5.198408000  | -0.550389000 | 1.027331000  | Ni                            | 1.016428000  | 0.753505000  | -0.806956000 |
| H  | 5.559539000  | -0.636233000 | 2.045483000  | N                             | 1.247177000  | 0.736589000  | 1.256368000  |
| C  | 6.051560000  | -0.712349000 | -0.074035000 | N                             | 2.996074000  | 0.733087000  | -0.653773000 |
| H  | 7.101937000  | -0.929983000 | 0.091578000  | N                             | 1.563915000  | 0.827115000  | -2.811405000 |
| C  | 5.569396000  | -0.596988000 | -1.386065000 | C                             | 0.195747000  | 0.766754000  | 2.213564000  |
| H  | 6.218970000  | -0.719351000 | -2.244841000 | C                             | -0.346353000 | -0.442408000 | 2.703031000  |
| C  | 4.213124000  | -0.317910000 | -1.557196000 | C                             | 0.225104000  | -1.771369000 | 2.268690000  |
| C  | 3.455492000  | -0.147096000 | -2.862538000 | H                             | 1.280122000  | -1.865020000 | 2.550112000  |
| O  | 4.059167000  | -0.249611000 | -3.944938000 | H                             | -0.323652000 | -2.599194000 | 2.726809000  |
| C  | 1.312679000  | 0.271914000  | -3.834948000 | H                             | 0.176828000  | -1.890711000 | 1.179628000  |
| C  | 1.020949000  | 1.570977000  | -4.302482000 | C                             | -1.422634000 | -0.387466000 | 3.600492000  |
| C  | 1.611749000  | 2.785203000  | -3.625489000 | H                             | -1.842150000 | -1.316115000 | 3.980489000  |
| H  | 1.310733000  | 2.843686000  | -2.572717000 | C                             | -1.958255000 | 0.836381000  | 4.009198000  |
| H  | 1.287095000  | 3.702944000  | -4.123657000 | H                             | -2.792295000 | 0.863092000  | 4.705318000  |
| H  | 2.707255000  | 2.760401000  | -3.638223000 | C                             | -1.414146000 | 2.025867000  | 3.517869000  |
| C  | 0.172574000  | 1.712792000  | -5.410035000 | H                             | -1.824831000 | 2.981587000  | 3.835616000  |
| H  | -0.055188000 | 2.710466000  | -5.777496000 | C                             | -0.337111000 | 2.010313000  | 2.619691000  |
| C  | -0.376779000 | 0.595455000  | -6.042684000 | C                             | 0.246557000  | 3.301268000  | 2.095529000  |
| H  | -1.033367000 | 0.720822000  | -6.899308000 | H                             | 0.197187000  | 3.347459000  | 1.001058000  |
| C  | -0.078186000 | -0.684252000 | -5.569114000 | H                             | 1.303864000  | 3.402692000  | 2.365495000  |
| H  | -0.502987000 | -1.556501000 | -6.059972000 | H                             | -0.291170000 | 4.164075000  | 2.499086000  |
| C  | 0.767143000  | -0.867720000 | -4.465336000 | C                             | 2.515565000  | 0.698467000  | 1.696442000  |
| C  | 1.090528000  | -2.257098000 | -3.968502000 | O                             | 2.926357000  | 0.677480000  | 2.880818000  |
| H  | 2.158544000  | -2.480261000 | -4.073571000 | C                             | 3.532469000  | 0.689418000  | 0.567554000  |
| H  | 0.531349000  | -3.009789000 | -4.530836000 | C                             | 4.919484000  | 0.649978000  | 0.715345000  |
| H  | 0.846293000  | -2.371272000 | -2.906105000 | H                             | 5.358895000  | 0.614676000  | 1.705223000  |
| F  | -0.757967000 | 0.455842000  | -1.203492000 | C                             | 5.705726000  | 0.658022000  | -0.443771000 |
| F  | -3.266688000 | -3.175223000 | -2.392504000 | H                             | 6.787763000  | 0.626870000  | -0.360163000 |
| Ag | -2.095827000 | -1.478453000 | -1.876192000 | C                             | 5.108825000  | 0.708202000  | -1.709846000 |
| H  | -4.230533000 | 1.770853000  | -3.475537000 | H                             | 5.697312000  | 0.718967000  | -2.619602000 |
| C  | -4.324170000 | 2.417693000  | -2.583057000 | C                             | 3.715426000  | 0.745129000  | -1.777839000 |
| H  | -5.246220000 | 2.989627000  | -2.791448000 | C                             | 2.885907000  | 0.812171000  | -3.049245000 |
| C  | -4.512943000 | 1.571364000  | -1.358483000 | O                             | 3.476021000  | 0.854846000  | -4.154647000 |
| H  | -5.369749000 | 0.903749000  | -1.331908000 | C                             | 0.676776000  | 0.909192000  | -3.919895000 |
| C  | -3.651848000 | 1.629066000  | -0.296373000 | C                             | 0.162534000  | 2.168197000  | -4.301874000 |
| H  | -3.825199000 | 1.004921000  | 0.576180000  | C                             | 0.599424000  | 3.424184000  | -3.584817000 |
| C  | -2.512492000 | 2.494765000  | -0.311588000 | H                             | 0.367199000  | 3.376005000  | -2.514257000 |
| H  | -1.320281000 | 1.187613000  | -0.889055000 | H                             | 0.102046000  | 4.304112000  | -4.002938000 |
| H  | -1.909891000 | 2.606700000  | 0.586528000  | H                             | 1.681968000  | 3.576116000  | -3.663432000 |

|                               |              |              |              |    |              |              |              |
|-------------------------------|--------------|--------------|--------------|----|--------------|--------------|--------------|
| C                             | -0.754748000 | 2.233420000  | -5.360754000 | C  | -0.337471000 | 2.102660000  | 2.743180000  |
| H                             | -1.149606000 | 3.201642000  | -5.660314000 | C  | 0.305415000  | 3.408022000  | 2.336324000  |
| C                             | -1.159390000 | 1.078005000  | -6.033869000 | H  | 0.295286000  | 3.542517000  | 1.248206000  |
| H                             | -1.870225000 | 1.143075000  | -6.853260000 | H  | 1.355584000  | 3.447700000  | 2.647056000  |
| C                             | -0.642503000 | -0.161349000 | -5.648308000 | H  | -0.215147000 | 4.255623000  | 2.790773000  |
| H                             | -0.952583000 | -1.063489000 | -6.170582000 | C  | 2.428405000  | 0.904644000  | 1.656341000  |
| C                             | 0.276412000  | -0.265900000 | -4.594032000 | O  | 2.844677000  | 0.927952000  | 2.836073000  |
| C                             | 0.833190000  | -1.610724000 | -4.190875000 | C  | 3.435104000  | 0.911180000  | 0.520028000  |
| H                             | 1.922058000  | -1.643785000 | -4.309708000 | C  | 4.823773000  | 0.952409000  | 0.647059000  |
| H                             | 0.400094000  | -2.409248000 | -4.800018000 | H  | 5.279181000  | 0.980832000  | 1.629889000  |
| H                             | 0.622704000  | -1.831967000 | -3.137787000 | C  | 5.590956000  | 0.958040000  | -0.525194000 |
| F                             | -0.957741000 | 0.673553000  | -0.959267000 | H  | 6.673987000  | 0.991256000  | -0.458111000 |
| F                             | -2.904853000 | -3.089387000 | -1.430381000 | C  | 4.975403000  | 0.922394000  | -1.783203000 |
| Ag                            | -1.905747000 | -1.259598000 | -1.202722000 | H  | 5.550583000  | 0.927136000  | -2.701451000 |
| C                             | -3.082497000 | 2.364132000  | -0.961379000 | C  | 3.581526000  | 0.881136000  | -1.829825000 |
| H                             | -2.197411000 | 2.978169000  | -0.840227000 | C  | 2.723106000  | 0.837974000  | -3.081951000 |
| C                             | -3.548114000 | 2.097611000  | -2.269700000 | O  | 3.283699000  | 0.821789000  | -4.200929000 |
| H                             | -3.003813000 | 2.487361000  | -3.122336000 | C  | 0.499534000  | 0.751372000  | -3.913723000 |
| C                             | -4.675540000 | 1.337382000  | -2.434685000 | C  | -0.046175000 | 1.940398000  | -4.444019000 |
| H                             | -5.057522000 | 1.113213000  | -3.426120000 | C  | 0.372621000  | 3.286008000  | -3.900376000 |
| C                             | -5.408804000 | 0.802759000  | -1.275901000 | H  | 0.191468000  | 3.358134000  | -2.821748000 |
| H                             | -5.521631000 | -0.292663000 | -1.381454000 | H  | -0.175260000 | 4.093258000  | -4.394811000 |
| H                             | -6.465694000 | 1.127917000  | -1.327259000 | H  | 1.444201000  | 3.462007000  | -4.050022000 |
| C                             | -4.863737000 | 1.116834000  | 0.054770000  | C  | -0.972956000 | 1.850024000  | -5.492618000 |
| H                             | -5.386515000 | 0.727673000  | 0.923297000  | H  | -1.395379000 | 2.762917000  | -5.906005000 |
| C                             | -3.735005000 | 1.880053000  | 0.195871000  | C  | -1.354139000 | 0.609968000  | -6.010610000 |
| H                             | -3.328247000 | 2.107620000  | 1.174991000  | H  | -2.073824000 | 0.554831000  | -6.822916000 |
| <sup>3</sup> TS <sub>pF</sub> |              |              |              | C  | -0.803472000 | -0.559220000 | -5.479961000 |
| Ni                            | 0.912048000  | 0.846667000  | -0.817477000 | H  | -1.094201000 | -1.526558000 | -5.882805000 |
| N                             | 1.151845000  | 0.869934000  | 1.228655000  | C  | 0.126214000  | -0.508670000 | -4.431399000 |
| N                             | 2.883718000  | 0.875960000  | -0.693549000 | C  | 0.730060000  | -1.777287000 | -3.876532000 |
| N                             | 1.403659000  | 0.821446000  | -2.815571000 | H  | 1.812929000  | -1.809268000 | -4.044221000 |
| C                             | 0.117419000  | 0.876623000  | 2.207009000  | H  | 0.287569000  | -2.658284000 | -4.349599000 |
| C                             | -0.476444000 | -0.344715000 | 2.595717000  | H  | 0.575836000  | -1.856017000 | -2.794290000 |
| C                             | 0.021266000  | -1.653979000 | 2.030894000  | F  | -1.173974000 | 0.808360000  | -1.007098000 |
| H                             | 1.081010000  | -1.812367000 | 2.260761000  | F  | -2.645986000 | -3.331344000 | -2.041153000 |
| H                             | -0.545387000 | -2.494718000 | 2.440770000  | Ag | -2.276924000 | -1.327828000 | -1.415319000 |
| H                             | -0.070308000 | -1.680943000 | 0.938365000  | C  | -2.468349000 | 1.766704000  | -0.319499000 |
| C                             | -1.529559000 | -0.320526000 | 3.521569000  | H  | -1.830507000 | 2.206820000  | 0.438607000  |
| H                             | -1.988294000 | -1.258392000 | 3.825648000  | C  | -2.887068000 | 2.624564000  | -1.417576000 |
| C                             | -1.991038000 | 0.885123000  | 4.055343000  | H  | -2.252468000 | 3.463877000  | -1.680710000 |
| H                             | -2.809438000 | 0.888507000  | 4.770051000  | C  | -4.035984000 | 2.382494000  | -2.082321000 |
| C                             | -1.394695000 | 2.086377000  | 3.664767000  | H  | -4.339525000 | 3.032209000  | -2.898691000 |
| H                             | -1.749825000 | 3.027155000  | 4.078669000  | C  | -4.952512000 | 1.264080000  | -1.724934000 |

|                               |              |              |              |                               |              |              |              |
|-------------------------------|--------------|--------------|--------------|-------------------------------|--------------|--------------|--------------|
| H                             | -5.096218000 | 0.605871000  | -2.596947000 | H                             | 0.235439000  | 4.203038000  | -4.530288000 |
| H                             | -5.963635000 | 1.660327000  | -1.538062000 | H                             | 1.786246000  | 3.443961000  | -4.134711000 |
| C                             | -4.523544000 | 0.458679000  | -0.547279000 | C                             | -0.761556000 | 1.992629000  | -5.521447000 |
| H                             | -5.194122000 | -0.324112000 | -0.203368000 | H                             | -1.085824000 | 2.918619000  | -5.990338000 |
| C                             | -3.376815000 | 0.712978000  | 0.128785000  | C                             | -1.267002000 | 0.770458000  | -5.970923000 |
| H                             | -3.118807000 | 0.169137000  | 1.032288000  | H                             | -1.983141000 | 0.743028000  | -6.787689000 |
| <sup>3</sup> PC <sub>PF</sub> |              |              |              | C                             | -0.848459000 | -0.416133000 | -5.364671000 |
| Ni                            | 1.031106000  | 0.875555000  | -0.821654000 | H                             | -1.239475000 | -1.369585000 | -5.711452000 |
| N                             | 1.194994000  | 0.873876000  | 1.168112000  | C                             | 0.075550000  | -0.401085000 | -4.309977000 |
| N                             | 2.982339000  | 0.912679000  | -0.675877000 | C                             | 0.528248000  | -1.689431000 | -3.664466000 |
| N                             | 1.485958000  | 0.874123000  | -2.766149000 | H                             | 1.609421000  | -1.834335000 | -3.771755000 |
| C                             | 0.132444000  | 0.839827000  | 2.120402000  | H                             | 0.024468000  | -2.548053000 | -4.116716000 |
| C                             | -0.393832000 | -0.405811000 | 2.526880000  | H                             | 0.315380000  | -1.695657000 | -2.589140000 |
| C                             | 0.189183000  | -1.696884000 | 2.003395000  | F                             | -1.161573000 | 0.788093000  | -1.070134000 |
| H                             | 1.246283000  | -1.798540000 | 2.273973000  | F                             | -3.075938000 | -3.312590000 | -1.942669000 |
| H                             | -0.348943000 | -2.557970000 | 2.409034000  | Ag                            | -3.377711000 | -1.437565000 | -1.059403000 |
| H                             | 0.137803000  | -1.744941000 | 0.909480000  | C                             | -2.342245000 | 1.576483000  | -0.625081000 |
| C                             | -1.467316000 | -0.420627000 | 3.429393000  | H                             | -1.893657000 | 2.285313000  | 0.074829000  |
| H                             | -1.876645000 | -1.376050000 | 3.748377000  | C                             | -2.914255000 | 2.234997000  | -1.830946000 |
| C                             | -2.012107000 | 0.768784000  | 3.919434000  | H                             | -2.240685000 | 2.865664000  | -2.403182000 |
| H                             | -2.845104000 | 0.741045000  | 4.616421000  | C                             | -4.199403000 | 2.097062000  | -2.183508000 |
| C                             | -1.481608000 | 1.993636000  | 3.508188000  | H                             | -4.575065000 | 2.621302000  | -3.058470000 |
| H                             | -1.902388000 | 2.921393000  | 3.888095000  | C                             | -5.187248000 | 1.276168000  | -1.410855000 |
| C                             | -0.405971000 | 2.050100000  | 2.609791000  | H                             | -5.732983000 | 0.599903000  | -2.082193000 |
| C                             | 0.171053000  | 3.380095000  | 2.184632000  | H                             | -5.966902000 | 1.932477000  | -0.992853000 |
| H                             | 0.172171000  | 3.492000000  | 1.094016000  | C                             | -4.575601000 | 0.506224000  | -0.276245000 |
| H                             | 1.212357000  | 3.484985000  | 2.510102000  | H                             | -5.252645000 | -0.049785000 | 0.368997000  |
| H                             | -0.402250000 | 4.206581000  | 2.613382000  | C                             | -3.262178000 | 0.628227000  | 0.084203000  |
| C                             | 2.468135000  | 0.905901000  | 1.646351000  | H                             | -2.904096000 | 0.207049000  | 1.020973000  |
| O                             | 2.828129000  | 0.912271000  | 2.837650000  | <sup>3</sup> PC <sub>pH</sub> |              |              |              |
| C                             | 3.511679000  | 0.932109000  | 0.544329000  | Ni                            | 1.026309000  | 0.706206000  | -0.884081000 |
| C                             | 4.898574000  | 0.971212000  | 0.690007000  | N                             | 1.064904000  | 0.728316000  | 1.100123000  |
| H                             | 5.347073000  | 0.987554000  | 1.676420000  | N                             | 2.915232000  | 1.129817000  | -0.634397000 |
| C                             | 5.677550000  | 0.989053000  | -0.475817000 | N                             | 1.570849000  | 0.769714000  | -2.790232000 |
| H                             | 6.759581000  | 1.020149000  | -0.395818000 | C                             | -0.033013000 | 0.508699000  | 1.986572000  |
| C                             | 5.078954000  | 0.967721000  | -1.743581000 | C                             | -0.403963000 | -0.813615000 | 2.312957000  |
| H                             | 5.668831000  | 0.981244000  | -2.652517000 | C                             | 0.381869000  | -1.990040000 | 1.783407000  |
| C                             | 3.685516000  | 0.929049000  | -1.804824000 | H                             | 1.434207000  | -1.938785000 | 2.084768000  |
| C                             | 2.815995000  | 0.900256000  | -3.049303000 | H                             | -0.032664000 | -2.931245000 | 2.154782000  |
| O                             | 3.350361000  | 0.899901000  | -4.173499000 | H                             | 0.370437000  | -2.022683000 | 0.687216000  |
| C                             | 0.578012000  | 0.841269000  | -3.867421000 | C                             | -1.512322000 | -1.014557000 | 3.148412000  |
| C                             | 0.162435000  | 2.048841000  | -4.468240000 | H                             | -1.802595000 | -2.030077000 | 3.406475000  |
| C                             | 0.702185000  | 3.375539000  | -3.988687000 | C                             | -2.239154000 | 0.066442000  | 3.651925000  |
| H                             | 0.518983000  | 3.519438000  | -2.917405000 | H                             | -3.095309000 | -0.105169000 | 4.298575000  |

|   |              |             |              |    |              |              |              |
|---|--------------|-------------|--------------|----|--------------|--------------|--------------|
| C | -1.859764000 | 1.369390000 | 3.320938000  | H  | -1.360581000 | 2.154698000  | -6.055172000 |
| H | -2.422893000 | 2.213516000 | 3.711667000  | C  | -0.971352000 | 0.034663000  | -6.085274000 |
| C | -0.757718000 | 1.611756000 | 2.488642000  | H  | -1.636311000 | -0.157049000 | -6.922959000 |
| C | -0.353016000 | 3.025109000 | 2.142323000  | C  | -0.267869000 | -1.016770000 | -5.493245000 |
| H | -0.302294000 | 3.174458000 | 1.057653000  | H  | -0.384695000 | -2.028900000 | -5.872919000 |
| H | 0.639600000  | 3.265117000 | 2.540271000  | C  | 0.594918000  | -0.789844000 | -4.411280000 |
| H | -1.065090000 | 3.744946000 | 2.555247000  | C  | 1.356963000  | -1.932950000 | -3.783007000 |
| C | 2.278088000  | 1.008647000 | 1.652377000  | H  | 2.440097000  | -1.783888000 | -3.859885000 |
| O | 2.557167000  | 1.080065000 | 2.862187000  | H  | 1.110005000  | -2.878766000 | -4.272885000 |
| C | 3.360773000  | 1.243268000 | 0.613183000  | H  | 1.127822000  | -2.031126000 | -2.715299000 |
| C | 4.705060000  | 1.545299000 | 0.833372000  | F  | -1.144394000 | 0.101595000  | -1.261015000 |
| H | 5.089722000  | 1.642303000 | 1.841846000  | F  | -2.509786000 | -4.275952000 | -1.831703000 |
| C | 5.528188000  | 1.715682000 | -0.289336000 | Ag | -1.946789000 | -2.234368000 | -1.625668000 |
| H | 6.578338000  | 1.952508000 | -0.150790000 | C  | -5.121149000 | 0.232996000  | -2.088947000 |
| C | 5.016557000  | 1.582137000 | -1.588386000 | H  | -5.788323000 | -0.427126000 | -2.635573000 |
| H | 5.643305000  | 1.707640000 | -2.463503000 | C  | -4.817796000 | -0.036263000 | -0.750224000 |
| C | 3.661942000  | 1.277336000 | -1.724740000 | H  | -5.250784000 | -0.900767000 | -0.256217000 |
| C | 2.880581000  | 1.068745000 | -3.010771000 | C  | -3.958056000 | 0.815283000  | -0.043403000 |
| O | 3.456952000  | 1.174456000 | -4.107902000 | H  | -3.722333000 | 0.616137000  | 0.998003000  |
| C | 0.739984000  | 0.528075000 | -3.926541000 | C  | -3.399646000 | 1.934861000  | -0.683213000 |
| C | 0.036442000  | 1.600584000 | -4.514676000 | H  | -1.883460000 | 0.674263000  | -1.035918000 |
| C | 0.196937000  | 3.007948000 | -3.990371000 | H  | -2.768116000 | 2.620707000  | -0.124418000 |
| H | -0.078712000 | 3.074334000 | -2.931298000 | C  | -3.708534000 | 2.201354000  | -2.028222000 |
| H | -0.432134000 | 3.704793000 | -4.551167000 | H  | -3.280533000 | 3.070159000  | -2.519109000 |
| H | 1.235163000  | 3.350049000 | -4.068166000 | C  | -4.566365000 | 1.349127000  | -2.728610000 |
| C | -0.815721000 | 1.333462000 | -5.595827000 | H  | -4.804144000 | 1.552855000  | -3.768343000 |

## VI) C-H bond activation of CHD by the distal fluorine of 1<sub>F</sub>-Ag-F

|                              |              |              |              |   |              |             |              |
|------------------------------|--------------|--------------|--------------|---|--------------|-------------|--------------|
| <sup>2</sup> RC <sub>d</sub> |              |              |              | C | -1.112221000 | 1.893082000 | 3.232754000  |
| Ni                           | 1.630837000  | 0.768080000  | -0.743672000 | H | -1.589302000 | 2.824125000 | 3.526878000  |
| N                            | 1.724940000  | 0.735120000  | 1.134008000  | C | -0.004168000 | 1.935659000 | 2.377062000  |
| N                            | 3.477125000  | 0.708084000  | -0.640498000 | C | 0.530204000  | 3.253068000 | 1.869911000  |
| N                            | 1.934834000  | 0.765091000  | -2.599887000 | H | 0.511238000  | 3.297037000 | 0.775597000  |
| C                            | 0.602705000  | 0.714545000  | 2.012528000  | H | 1.569768000  | 3.411150000 | 2.178931000  |
| C                            | 0.117433000  | -0.526498000 | 2.480265000  | H | -0.066042000 | 4.084231000 | 2.254991000  |
| C                            | 0.781589000  | -1.823829000 | 2.086044000  | C | 2.998279000  | 0.691262000 | 1.664969000  |
| H                            | 1.802298000  | -1.886785000 | 2.481069000  | O | 3.296355000  | 0.666192000 | 2.857356000  |
| H                            | 0.219385000  | -2.677147000 | 2.473474000  | C | 4.032802000  | 0.680234000 | 0.571430000  |
| H                            | 0.850695000  | -1.925712000 | 0.997616000  | C | 5.419299000  | 0.643101000 | 0.688119000  |
| C                            | -0.993893000 | -0.521520000 | 3.333339000  | H | 5.879536000  | 0.620060000 | 1.669065000  |
| H                            | -1.380495000 | -1.467491000 | 3.702896000  | C | 6.179279000  | 0.635514000 | -0.489231000 |
| C                            | -1.606482000 | 0.676179000  | 3.708125000  | H | 7.261928000  | 0.606731000 | -0.428801000 |
| H                            | -2.468832000 | 0.661212000  | 4.368613000  | C | 5.555828000  | 0.663382000 | -1.743882000 |

|                               |              |              |              |   |              |              |              |
|-------------------------------|--------------|--------------|--------------|---|--------------|--------------|--------------|
| H                             | 6.123478000  | 0.656703000  | -2.667060000 | C | -0.567977000 | 0.024664000  | 2.285154000  |
| C                             | 4.164991000  | 0.699721000  | -1.782892000 | C | -0.100295000 | -1.398387000 | 2.103766000  |
| C                             | 3.259685000  | 0.731785000  | -2.985337000 | H | 0.843797000  | -1.577411000 | 2.629594000  |
| O                             | 3.689926000  | 0.730920000  | -4.137035000 | H | -0.843462000 | -2.100296000 | 2.491032000  |
| C                             | 0.918292000  | 0.780453000  | -3.598816000 | H | 0.070370000  | -1.627293000 | 1.045784000  |
| C                             | 0.379047000  | 2.019637000  | -4.006410000 | C | -1.738906000 | 0.298394000  | 2.999010000  |
| C                             | 0.876274000  | 3.316917000  | -3.416351000 | H | -2.298585000 | -0.525617000 | 3.433746000  |
| H                             | 0.740979000  | 3.338576000  | -2.329584000 | C | -2.197748000 | 1.610858000  | 3.157637000  |
| H                             | 0.337630000  | 4.166308000  | -3.844127000 | H | -3.091256000 | 1.808527000  | 3.743032000  |
| H                             | 1.945285000  | 3.463152000  | -3.609012000 | C | -1.487824000 | 2.670950000  | 2.582069000  |
| C                             | -0.625790000 | 2.014087000  | -4.981999000 | H | -1.841037000 | 3.690554000  | 2.711805000  |
| H                             | -1.049409000 | 2.959481000  | -5.310274000 | C | -0.316461000 | 2.442473000  | 1.853763000  |
| C                             | -1.085370000 | 0.815539000  | -5.532767000 | C | 0.453036000  | 3.596523000  | 1.260442000  |
| H                             | -1.867167000 | 0.829263000  | -6.286923000 | H | 0.493795000  | 3.520913000  | 0.168973000  |
| C                             | -0.541520000 | -0.400474000 | -5.113422000 | H | 1.487854000  | 3.614389000  | 1.619523000  |
| H                             | -0.900660000 | -1.332030000 | -5.542529000 | H | -0.016814000 | 4.548396000  | 1.522444000  |
| C                             | 0.466133000  | -0.442295000 | -4.140945000 | C | 2.461263000  | 0.481398000  | 1.653269000  |
| C                             | 1.058441000  | -1.758996000 | -3.699531000 | O | 2.615675000  | 0.359138000  | 2.880289000  |
| H                             | 2.119536000  | -1.829417000 | -3.965790000 | C | 3.593589000  | 0.220489000  | 0.695091000  |
| H                             | 0.537485000  | -2.593814000 | -4.174974000 | C | 4.889772000  | -0.184311000 | 1.003805000  |
| H                             | 0.990036000  | -1.887431000 | -2.613860000 | H | 5.173855000  | -0.339876000 | 2.038028000  |
| F                             | -0.209371000 | 0.885219000  | -0.851059000 | C | 5.790182000  | -0.380337000 | -0.050950000 |
| F                             | -2.867978000 | -2.508546000 | -0.913978000 | H | 6.807074000  | -0.695040000 | 0.160021000  |
| Ag                            | -1.561905000 | -0.858709000 | -0.886775000 | C | 5.385504000  | -0.176826000 | -1.376124000 |
| H                             | -4.896429000 | -1.040951000 | -1.244034000 | H | 6.059553000  | -0.326323000 | -2.211549000 |
| C                             | -5.671875000 | -0.280882000 | -1.430097000 | C | 4.072804000  | 0.225520000  | -1.610921000 |
| H                             | -6.457912000 | -0.816708000 | -1.986758000 | C | 3.410391000  | 0.482705000  | -2.941408000 |
| C                             | -6.226686000 | 0.220875000  | -0.120690000 | O | 4.042821000  | 0.354971000  | -4.007341000 |
| H                             | -6.652848000 | -0.524173000 | 0.549751000  | C | 1.308124000  | 1.091009000  | -3.919062000 |
| C                             | -6.216072000 | 1.509319000  | 0.245840000  | C | 1.044676000  | 2.424052000  | -4.302245000 |
| H                             | -6.633086000 | 1.798760000  | 1.209370000  | C | 1.651189000  | 3.579849000  | -3.543343000 |
| C                             | -5.649579000 | 2.614935000  | -0.610166000 | H | 1.331040000  | 3.577921000  | -2.495674000 |
| H                             | -4.867231000 | 3.155679000  | -0.053763000 | H | 1.357686000  | 4.533837000  | -3.990297000 |
| H                             | -6.423465000 | 3.376296000  | -0.798798000 | H | 2.745861000  | 3.527538000  | -3.540330000 |
| C                             | -5.093609000 | 2.114188000  | -1.920048000 | C | 0.216550000  | 2.654079000  | -5.409475000 |
| H                             | -4.664890000 | 2.859221000  | -2.588724000 | H | 0.011604000  | 3.677652000  | -5.713578000 |
| C                             | -5.105791000 | 0.825165000  | -2.284806000 | C | -0.341092000 | 1.590711000  | -6.123296000 |
| H                             | -4.686996000 | 0.536251000  | -3.247684000 | H | -0.982311000 | 1.784673000  | -6.978845000 |
| <sup>2</sup> TS <sub>dH</sub> |              |              |              | C | -0.070561000 | 0.277115000  | -5.733652000 |
| Ni                            | 1.514558000  | 0.944102000  | -0.939469000 | H | -0.502793000 | -0.552443000 | -6.287888000 |
| N                             | 1.339260000  | 0.872445000  | 0.990476000  | C | 0.753195000  | 0.005217000  | -4.631992000 |
| N                             | 3.239888000  | 0.413549000  | -0.580667000 | C | 1.046402000  | -1.420349000 | -4.228534000 |
| N                             | 2.118191000  | 0.845182000  | -2.773680000 | H | 2.103891000  | -1.665760000 | -4.380505000 |
| C                             | 0.151664000  | 1.110164000  | 1.721003000  | H | 0.448820000  | -2.120548000 | -4.818669000 |

|                              |              |              |              |                              |              |              |              |
|------------------------------|--------------|--------------|--------------|------------------------------|--------------|--------------|--------------|
| H                            | 0.828630000  | -1.590537000 | -3.168414000 | H                            | 5.478755000  | -0.072223000 | 1.934798000  |
| F                            | -0.240151000 | 1.461088000  | -1.310310000 | C                            | 5.974570000  | -0.171791000 | -0.183878000 |
| F                            | -3.026026000 | -1.788259000 | -1.831987000 | H                            | 7.015979000  | -0.431157000 | -0.022209000 |
| Ag                           | -1.595563000 | -0.226497000 | -1.572753000 | C                            | 5.485548000  | -0.036760000 | -1.489324000 |
| H                            | -4.488546000 | -1.172409000 | -1.474438000 | H                            | 6.117391000  | -0.184543000 | -2.357417000 |
| C                            | -5.466737000 | -0.615050000 | -1.191449000 | C                            | 4.144264000  | 0.296892000  | -1.660581000 |
| H                            | -6.163369000 | -1.037298000 | -1.930181000 | C                            | 3.401618000  | 0.492040000  | -2.959605000 |
| C                            | -5.791953000 | -0.995119000 | 0.198810000  | O                            | 3.983144000  | 0.350343000  | -4.056203000 |
| H                            | -6.130158000 | -2.011756000 | 0.381337000  | C                            | 1.239354000  | 1.017919000  | -3.837159000 |
| C                            | -5.642166000 | -0.133234000 | 1.235218000  | C                            | 0.991104000  | 2.329452000  | -4.295780000 |
| H                            | -5.864379000 | -0.452170000 | 2.250030000  | C                            | 1.679209000  | 3.510982000  | -3.654914000 |
| C                            | -5.172993000 | 1.267941000  | 1.039415000  | H                            | 1.466124000  | 3.559096000  | -2.581389000 |
| H                            | -4.194533000 | 1.398170000  | 1.558319000  | H                            | 1.352142000  | 4.447870000  | -4.114716000 |
| H                            | -5.814687000 | 1.976099000  | 1.590411000  | H                            | 2.768503000  | 3.444252000  | -3.757700000 |
| C                            | -5.026072000 | 1.688607000  | -0.381703000 | C                            | 0.097594000  | 2.513528000  | -5.360454000 |
| H                            | -4.787585000 | 2.730611000  | -0.577221000 | H                            | -0.097826000 | 3.521069000  | -5.719760000 |
| C                            | -5.184878000 | 0.817546000  | -1.411943000 | C                            | -0.538156000 | 1.424538000  | -5.961636000 |
| H                            | -5.069149000 | 1.161312000  | -2.436393000 | H                            | -1.228679000 | 1.582376000  | -6.785746000 |
| <sup>2</sup> IM <sub>d</sub> |              |              |              | C                            | -0.281733000 | 0.131659000  | -5.499334000 |
| Ni                           | 1.604081000  | 0.935730000  | -0.862862000 | H                            | -0.773278000 | -0.718345000 | -5.966625000 |
| N                            | 1.548219000  | 0.921499000  | 1.074463000  | C                            | 0.605149000  | -0.092452000 | -4.436166000 |
| N                            | 3.360135000  | 0.480302000  | -0.590123000 | C                            | 0.882731000  | -1.496163000 | -3.951783000 |
| N                            | 2.113795000  | 0.818801000  | -2.730729000 | H                            | 1.928603000  | -1.776803000 | -4.121937000 |
| C                            | 0.390197000  | 1.173276000  | 1.864166000  | H                            | 0.249874000  | -2.219193000 | -4.474028000 |
| C                            | -0.405337000 | 0.092282000  | 2.302686000  | H                            | 0.700965000  | -1.592774000 | -2.875530000 |
| C                            | -0.012843000 | -1.332742000 | 1.990713000  | F                            | -0.174624000 | 1.439865000  | -1.135388000 |
| H                            | 0.935511000  | -1.598731000 | 2.471795000  | F                            | -3.439167000 | -1.762474000 | -1.696626000 |
| H                            | -0.777343000 | -2.031665000 | 2.341526000  | Ag                           | -1.750852000 | -0.095383000 | -1.339966000 |
| H                            | 0.125839000  | -1.484765000 | 0.914355000  | H                            | -4.314370000 | -1.371871000 | -1.638803000 |
| C                            | -1.562685000 | 0.366274000  | 3.046037000  | C                            | -6.052616000 | -0.509164000 | -1.572965000 |
| H                            | -2.179224000 | -0.460916000 | 3.389660000  | H                            | -6.359750000 | -1.070665000 | -2.451308000 |
| C                            | -1.928356000 | 1.679905000  | 3.348997000  | C                            | -6.372967000 | -0.993187000 | -0.267714000 |
| H                            | -2.827650000 | 1.876648000  | 3.926426000  | H                            | -6.838629000 | -1.970302000 | -0.168326000 |
| C                            | -1.131453000 | 2.739561000  | 2.908942000  | C                            | -6.101155000 | -0.251777000 | 0.850504000  |
| H                            | -1.412044000 | 3.763140000  | 3.145451000  | H                            | -6.349549000 | -0.637618000 | 1.835514000  |
| C                            | 0.033150000  | 2.505422000  | 2.164147000  | C                            | -5.460190000 | 1.103493000  | 0.772555000  |
| C                            | 0.892350000  | 3.656089000  | 1.697131000  | H                            | -4.520149000 | 1.108765000  | 1.355444000  |
| H                            | 0.994353000  | 3.657591000  | 0.606293000  | H                            | -6.082339000 | 1.846243000  | 1.304218000  |
| H                            | 1.906194000  | 3.592017000  | 2.108734000  | C                            | -5.193965000 | 1.569143000  | -0.629652000 |
| H                            | 0.461203000  | 4.612974000  | 2.004801000  | H                            | -4.761265000 | 2.557116000  | -0.761408000 |
| C                            | 2.710040000  | 0.613457000  | 1.684974000  | C                            | -5.487469000 | 0.794996000  | -1.720693000 |
| O                            | 2.944803000  | 0.529602000  | 2.909084000  | H                            | -5.285555000 | 1.171274000  | -2.720258000 |
| C                            | 3.797377000  | 0.357992000  | 0.670209000  | <sup>4</sup> RC <sub>d</sub> |              |              |              |
| C                            | 5.127843000  | 0.026176000  | 0.914076000  | Ni                           | 1.762417000  | 0.595612000  | -0.795111000 |

|   |              |              |              |                               |              |              |              |
|---|--------------|--------------|--------------|-------------------------------|--------------|--------------|--------------|
| N | 1.907756000  | 0.590610000  | 1.222044000  | C                             | 0.647002000  | 0.294833000  | -4.411294000 |
| N | 3.758394000  | 0.595453000  | -0.620474000 | C                             | 0.418656000  | -1.058409000 | -3.801034000 |
| N | 2.545636000  | 0.645523000  | -2.988044000 | H                             | 1.332616000  | -1.659939000 | -3.812312000 |
| C | 0.806679000  | 0.600440000  | 2.124049000  | H                             | -0.360253000 | -1.594652000 | -4.347661000 |
| C | 0.252558000  | -0.623076000 | 2.560327000  | H                             | 0.101825000  | -0.965916000 | -2.757563000 |
| C | 0.840682000  | -1.939052000 | 2.109013000  | F                             | -0.123083000 | 0.803420000  | -1.132312000 |
| H | 1.880630000  | -2.047507000 | 2.437695000  | F                             | -3.477400000 | -1.576138000 | 0.066583000  |
| H | 0.268170000  | -2.778627000 | 2.512858000  | Ag                            | -1.821508000 | -0.399822000 | -0.468646000 |
| H | 0.842687000  | -2.021345000 | 1.015902000  | H                             | -5.785239000 | -1.125721000 | -0.334535000 |
| C | -0.850455000 | -0.591325000 | 3.425328000  | C                             | -6.830974000 | -0.842503000 | -0.536791000 |
| H | -1.282124000 | -1.528854000 | 3.767022000  | H                             | -7.386666000 | -1.794202000 | -0.514944000 |
| C | -1.398009000 | 0.622240000  | 3.847920000  | C                             | -7.336596000 | 0.067370000  | 0.554392000  |
| H | -2.254131000 | 0.630602000  | 4.516931000  | H                             | -7.298134000 | -0.318260000 | 1.572305000  |
| C | -0.842938000 | 1.824956000  | 3.404083000  | C                             | -7.813855000 | 1.299547000  | 0.333760000  |
| H | -1.268272000 | 2.770961000  | 3.730291000  | H                             | -8.158215000 | 1.902353000  | 1.172892000  |
| C | 0.260523000  | 1.834479000  | 2.539636000  | C                             | -7.907230000 | 1.924220000  | -1.036432000 |
| C | 0.856911000  | 3.138341000  | 2.064826000  | H                             | -7.341266000 | 2.869548000  | -1.055895000 |
| H | 0.850808000  | 3.206133000  | 0.970739000  | H                             | -8.947066000 | 2.226244000  | -1.240355000 |
| H | 1.900978000  | 3.241221000  | 2.382089000  | C                             | -7.414773000 | 1.009829000  | -2.130836000 |
| H | 0.296691000  | 3.989104000  | 2.462610000  | H                             | -7.458660000 | 1.394124000  | -3.148942000 |
| C | 3.154568000  | 0.567439000  | 1.717158000  | C                             | -6.938043000 | -0.222038000 | -1.907142000 |
| O | 3.509685000  | 0.549591000  | 2.915347000  | H                             | -6.599067000 | -0.826344000 | -2.747569000 |
| C | 4.218810000  | 0.568119000  | 0.636285000  | <sup>4</sup> TS <sub>dH</sub> |              |              |              |
| C | 5.591247000  | 0.547368000  | 0.889086000  | Ni                            | 1.220238000  | 0.878424000  | -0.879711000 |
| H | 5.943156000  | 0.526458000  | 1.913427000  | N                             | 1.319920000  | 0.828233000  | 1.157891000  |
| C | 6.470977000  | 0.553572000  | -0.196778000 | N                             | 3.177763000  | 0.778589000  | -0.628915000 |
| H | 7.542852000  | 0.537463000  | -0.028728000 | N                             | 1.830442000  | 0.813811000  | -2.827414000 |
| C | 5.968695000  | 0.583196000  | -1.501190000 | C                             | 0.218512000  | 0.829940000  | 2.058710000  |
| H | 6.619548000  | 0.592348000  | -2.367085000 | C                             | -0.410610000 | -0.392163000 | 2.386512000  |
| C | 4.584615000  | 0.604096000  | -1.673155000 | C                             | 0.104266000  | -1.695895000 | 1.824260000  |
| C | 3.925810000  | 0.658868000  | -3.021999000 | H                             | 1.146204000  | -1.875624000 | 2.112291000  |
| O | 4.596427000  | 0.607967000  | -4.056059000 | H                             | -0.496683000 | -2.537149000 | 2.181005000  |
| C | 1.784464000  | 1.105547000  | -4.009460000 | H                             | 0.076747000  | -1.695643000 | 0.727948000  |
| C | 2.034307000  | 2.381857000  | -4.659091000 | C                             | -1.519809000 | -0.372772000 | 3.243768000  |
| C | 3.136473000  | 3.307387000  | -4.215202000 | H                             | -2.004460000 | -1.311002000 | 3.503375000  |
| H | 3.233508000  | 3.332545000  | -3.125450000 | C                             | -2.004337000 | 0.828963000  | 3.766793000  |
| H | 2.932957000  | 4.323485000  | -4.560347000 | H                             | -2.864725000 | 0.828590000  | 4.430356000  |
| H | 4.103279000  | 2.996277000  | -4.622745000 | C                             | -1.377693000 | 2.031583000  | 3.429178000  |
| C | 1.162647000  | 2.786815000  | -5.657887000 | H                             | -1.753112000 | 2.969256000  | 3.831997000  |
| H | 1.311193000  | 3.752996000  | -6.130331000 | C                             | -0.265448000 | 2.052710000  | 2.575872000  |
| C | 0.079028000  | 1.985501000  | -6.057928000 | C                             | 0.405789000  | 3.357595000  | 2.219327000  |
| H | -0.577823000 | 2.329855000  | -6.850837000 | H                             | 0.428953000  | 3.511452000  | 1.134329000  |
| C | -0.164729000 | 0.750581000  | -5.438823000 | H                             | 1.446030000  | 3.379707000  | 2.563600000  |
| H | -0.992851000 | 0.135414000  | -5.776602000 | H                             | -0.119735000 | 4.201818000  | 2.674452000  |



|    |              |              |              |                              |              |              |              |
|----|--------------|--------------|--------------|------------------------------|--------------|--------------|--------------|
| C  | 2.566330000  | 0.774217000  | 1.679887000  | C                            | -6.127187000 | 0.509922000  | -1.111022000 |
| O  | 2.890310000  | 0.737993000  | 2.885240000  | H                            | -7.046750000 | 0.286279000  | -1.644757000 |
| C  | 3.649891000  | 0.748677000  | 0.616760000  | <sup>4</sup> IM <sub>d</sub> |              |              |              |
| C  | 5.026703000  | 0.687775000  | 0.835224000  | Ni                           | 1.447618000  | 0.968066000  | -0.943152000 |
| H  | 5.419034000  | 0.663386000  | 1.845017000  | N                            | 1.479846000  | 0.916684000  | 1.135830000  |
| C  | 5.868316000  | 0.657977000  | -0.284667000 | N                            | 3.363645000  | 0.558116000  | -0.607168000 |
| H  | 6.944100000  | 0.611513000  | -0.146974000 | N                            | 2.165160000  | 0.836108000  | -2.885681000 |
| C  | 5.335590000  | 0.683417000  | -1.580360000 | C                            | 0.362879000  | 1.123914000  | 1.990265000  |
| H  | 5.969012000  | 0.655902000  | -2.459189000 | C                            | -0.452754000 | 0.028602000  | 2.351701000  |
| C  | 3.948042000  | 0.743804000  | -1.715865000 | C                            | -0.110445000 | -1.367747000 | 1.887719000  |
| C  | 3.167850000  | 0.767641000  | -3.018587000 | H                            | 0.872741000  | -1.683800000 | 2.254687000  |
| O  | 3.787846000  | 0.741461000  | -4.102521000 | H                            | -0.852763000 | -2.088732000 | 2.242061000  |
| C  | 0.985638000  | 0.844389000  | -3.973339000 | H                            | -0.070752000 | -1.426769000 | 0.793171000  |
| C  | 0.617007000  | 2.085680000  | -4.536727000 | C                            | -1.583636000 | 0.259535000  | 3.148174000  |
| C  | 1.160618000  | 3.377556000  | -3.973613000 | H                            | -2.212278000 | -0.581642000 | 3.431271000  |
| H  | 0.909661000  | 3.488121000  | -2.912225000 | C                            | -1.908401000 | 1.547628000  | 3.580981000  |
| H  | 0.754023000  | 4.237879000  | -4.512815000 | H                            | -2.787016000 | 1.711620000  | 4.199040000  |
| H  | 2.253555000  | 3.418232000  | -4.044881000 | C                            | -1.096127000 | 2.623590000  | 3.214279000  |
| C  | -0.265261000 | 2.097287000  | -5.626419000 | H                            | -1.345000000 | 3.628438000  | 3.547696000  |
| H  | -0.552776000 | 3.050545000  | -6.063836000 | C                            | 0.042645000  | 2.431093000  | 2.419097000  |
| C  | -0.775617000 | 0.907981000  | -6.152848000 | C                            | 0.912290000  | 3.601107000  | 2.023489000  |
| H  | -1.459608000 | 0.933208000  | -6.996819000 | H                            | 0.981489000  | 3.695705000  | 0.933340000  |
| C  | -0.401862000 | -0.313311000 | -5.587762000 | H                            | 1.936780000  | 3.484037000  | 2.394740000  |
| H  | -0.794272000 | -1.241929000 | -5.995396000 | H                            | 0.511280000  | 4.537026000  | 2.423042000  |
| C  | 0.479619000  | -0.365698000 | -4.497620000 | C                            | 2.675266000  | 0.659146000  | 1.689745000  |
| C  | 0.887229000  | -1.692621000 | -3.901193000 | O                            | 2.965359000  | 0.574510000  | 2.906983000  |
| H  | 1.966714000  | -1.859148000 | -3.994173000 | C                            | 3.772671000  | 0.450926000  | 0.658649000  |
| H  | 0.373172000  | -2.517782000 | -4.402148000 | C                            | 5.110830000  | 0.165063000  | 0.933045000  |
| H  | 0.652965000  | -1.740461000 | -2.831478000 | H                            | 5.447809000  | 0.077110000  | 1.959144000  |
| F  | -0.726223000 | 1.143763000  | -1.135568000 | C                            | 5.984059000  | -0.002045000 | -0.149234000 |
| F  | -3.631548000 | -1.674509000 | -2.340048000 | H                            | 7.030729000  | -0.225337000 | 0.033603000  |
| Ag | -2.130102000 | -0.334813000 | -1.747968000 | C                            | 5.519283000  | 0.114632000  | -1.465381000 |
| H  | -4.948497000 | -1.256592000 | -1.340219000 | H                            | 6.176230000  | -0.013264000 | -2.317558000 |
| C  | -5.399754000 | -0.626958000 | -0.492708000 | C                            | 4.167816000  | 0.402551000  | -1.660875000 |
| H  | -6.052859000 | -1.346802000 | 0.019578000  | C                            | 3.474125000  | 0.562900000  | -3.003850000 |
| C  | -4.207620000 | -0.273616000 | 0.294274000  | O                            | 4.148062000  | 0.431002000  | -4.053083000 |
| H  | -3.702812000 | -1.061141000 | 0.847400000  | C                            | 1.394396000  | 1.005699000  | -4.068248000 |
| C  | -3.704642000 | 1.004892000  | 0.325012000  | C                            | 1.247758000  | 2.293206000  | -4.630204000 |
| H  | -2.813760000 | 1.221594000  | 0.907244000  | C                            | 1.952363000  | 3.481319000  | -4.018857000 |
| C  | -4.406833000 | 2.140128000  | -0.332637000 | H                            | 1.661879000  | 3.621881000  | -2.971030000 |
| H  | -3.708195000 | 2.675215000  | -0.999343000 | H                            | 1.714109000  | 4.398443000  | -4.565216000 |
| H  | -4.624057000 | 2.905332000  | 0.436546000  | H                            | 3.040652000  | 3.352506000  | -4.029283000 |
| C  | -5.661382000 | 1.777348000  | -1.060399000 | C                            | 0.434078000  | 2.450015000  | -5.761466000 |
| H  | -6.209621000 | 2.584546000  | -1.538521000 | H                            | 0.319141000  | 3.439778000  | -6.197400000 |

|                               |              |              |              |    |              |              |              |
|-------------------------------|--------------|--------------|--------------|----|--------------|--------------|--------------|
| C                             | -0.225615000 | 1.358120000  | -6.330992000 | C  | 0.542751000  | 3.268467000  | 2.391929000  |
| H                             | -0.853054000 | 1.494722000  | -7.207667000 | H  | 0.567613000  | 3.446057000  | 1.310330000  |
| C                             | -0.074471000 | 0.089656000  | -5.765343000 | H  | 1.582627000  | 3.280791000  | 2.737702000  |
| H                             | -0.585865000 | -0.763877000 | -6.204552000 | H  | 0.018463000  | 4.104443000  | 2.863800000  |
| C                             | 0.730391000  | -0.105419000 | -4.633667000 | C  | 2.700016000  | 0.715336000  | 1.790625000  |
| C                             | 0.884256000  | -1.480285000 | -4.026730000 | O  | 3.045659000  | 0.650612000  | 2.994492000  |
| H                             | 1.930344000  | -1.807117000 | -4.030306000 | C  | 3.777752000  | 0.743769000  | 0.719687000  |
| H                             | 0.295999000  | -2.218071000 | -4.579953000 | C  | 5.154504000  | 0.709268000  | 0.944989000  |
| H                             | 0.554630000  | -1.494444000 | -2.980574000 | H  | 5.537429000  | 0.658488000  | 1.957304000  |
| F                             | -0.436090000 | 1.430185000  | -1.269976000 | C  | 6.005375000  | 0.741857000  | -0.166924000 |
| F                             | -3.734463000 | -1.714533000 | -1.819779000 | H  | 7.081111000  | 0.716671000  | -0.022343000 |
| Ag                            | -2.017216000 | -0.079715000 | -1.477844000 | C  | 5.480452000  | 0.805925000  | -1.463731000 |
| H                             | -4.596061000 | -1.320614000 | -1.662955000 | H  | 6.118485000  | 0.831364000  | -2.339126000 |
| C                             | -6.309570000 | -0.437085000 | -1.400460000 | C  | 4.092927000  | 0.836639000  | -1.609970000 |
| H                             | -6.687509000 | -0.952077000 | -2.279872000 | C  | 3.339177000  | 0.903752000  | -2.927953000 |
| C                             | -6.523176000 | -0.991222000 | -0.101380000 | O  | 3.993992000  | 0.932509000  | -3.997400000 |
| H                             | -6.976952000 | -1.975329000 | -0.016939000 | C  | 1.180521000  | 0.994004000  | -3.922035000 |
| C                             | -6.164340000 | -0.308016000 | 1.029453000  | C  | 0.835335000  | 2.253194000  | -4.461427000 |
| H                             | -6.331831000 | -0.747129000 | 2.009217000  | C  | 1.385348000  | 3.523163000  | -3.856218000 |
| C                             | -5.536586000 | 1.054417000  | 0.972746000  | H  | 1.119890000  | 3.606773000  | -2.795715000 |
| H                             | -4.552741000 | 1.036235000  | 1.477974000  | H  | 0.995651000  | 4.402815000  | -4.376526000 |
| H                             | -6.116429000 | 1.763053000  | 1.591627000  | H  | 2.479503000  | 3.552884000  | -3.910797000 |
| C                             | -5.386103000 | 1.595690000  | -0.419451000 | C  | -0.030561000 | 2.303772000  | -5.563194000 |
| H                             | -4.969326000 | 2.592812000  | -0.532438000 | H  | -0.298252000 | 3.271320000  | -5.981646000 |
| C                             | -5.762490000 | 0.877652000  | -1.523099000 | C  | -0.549925000 | 1.134912000  | -6.125424000 |
| H                             | -5.643053000 | 1.307954000  | -2.514104000 | H  | -1.219707000 | 1.189711000  | -6.979419000 |
| <sup>3</sup> PC <sub>df</sub> |              |              |              | C  | -0.203821000 | -0.104520000 | -5.581692000 |
| Ni                            | 1.341206000  | 0.856916000  | -0.792398000 | H  | -0.605324000 | -1.017597000 | -6.015268000 |
| N                             | 1.458284000  | 0.763180000  | 1.283427000  | C  | 0.658975000  | -0.194324000 | -4.479755000 |
| N                             | 3.310224000  | 0.806289000  | -0.529048000 | C  | 1.024011000  | -1.538948000 | -3.895922000 |
| N                             | 2.006876000  | 0.922449000  | -2.767419000 | H  | 2.105773000  | -1.711875000 | -3.927491000 |
| C                             | 0.354942000  | 0.745866000  | 2.179938000  | H  | 0.534217000  | -2.347969000 | -4.445528000 |
| C                             | -0.282868000 | -0.479669000 | 2.474254000  | H  | 0.725204000  | -1.610888000 | -2.842997000 |
| C                             | 0.235717000  | -1.773096000 | 1.890746000  | F  | -0.596790000 | 1.035165000  | -1.046635000 |
| H                             | 1.275820000  | -1.958599000 | 2.181882000  | F  | -3.775816000 | -2.140386000 | -1.571142000 |
| H                             | -0.367976000 | -2.621179000 | 2.226599000  | Ag | -2.074802000 | -0.567873000 | -1.263253000 |
| H                             | 0.215571000  | -1.752705000 | 0.794114000  | C  | -5.201582000 | -1.663423000 | -1.782474000 |
| C                             | -1.404182000 | -0.475480000 | 3.316482000  | H  | -5.706147000 | -2.625557000 | -1.890187000 |
| H                             | -1.895419000 | -1.417740000 | 3.548322000  | C  | -5.587416000 | -0.930704000 | -0.548551000 |
| C                             | -1.893083000 | 0.715995000  | 3.857857000  | H  | -5.653417000 | -1.509824000 | 0.368301000  |
| H                             | -2.762970000 | 0.704390000  | 4.509070000  | C  | -5.841279000 | 0.387324000  | -0.553682000 |
| C                             | -1.257210000 | 1.922683000  | 3.555383000  | H  | -6.116380000 | 0.886718000  | 0.372419000  |
| H                             | -1.635029000 | 2.853331000  | 3.972518000  | C  | -5.798099000 | 1.225623000  | -1.793593000 |
| C                             | -0.133170000 | 1.957526000  | 2.717774000  | H  | -5.086178000 | 2.054195000  | -1.656591000 |

|                               |              |              |              |    |              |              |              |
|-------------------------------|--------------|--------------|--------------|----|--------------|--------------|--------------|
| H                             | -6.767737000 | 1.728152000  | -1.933075000 | C  | 4.386117000  | 0.372335000  | -1.608239000 |
| C                             | -5.447797000 | 0.459008000  | -3.031137000 | C  | 3.787256000  | 0.648006000  | -2.977481000 |
| H                             | -5.426784000 | 1.012350000  | -3.967137000 | O  | 4.525749000  | 0.566211000  | -3.987798000 |
| C                             | -5.193526000 | -0.858958000 | -3.031754000 | C  | 1.792715000  | 1.223863000  | -4.137942000 |
| H                             | -4.967128000 | -1.384770000 | -3.955137000 | C  | 1.820903000  | 2.525065000  | -4.687301000 |
| <sup>3</sup> PC <sub>dH</sub> |              |              |              | C  | 2.621760000  | 3.620834000  | -4.024553000 |
| Ni                            | 1.647340000  | 0.986361000  | -1.019539000 | H  | 2.311891000  | 3.766487000  | -2.983023000 |
| N                             | 1.540592000  | 0.751907000  | 1.053840000  | H  | 2.496335000  | 4.569413000  | -4.554504000 |
| N                             | 3.518793000  | 0.471415000  | -0.598128000 | H  | 3.690783000  | 3.380462000  | -4.005905000 |
| N                             | 2.480137000  | 0.948512000  | -2.924677000 | C  | 1.087055000  | 2.783416000  | -5.853915000 |
| C                             | 0.376210000  | 0.913257000  | 1.853219000  | H  | 1.106433000  | 3.783847000  | -6.280118000 |
| C                             | -0.454343000 | -0.200048000 | 2.112843000  | C  | 0.335896000  | 1.779404000  | -6.470108000 |
| C                             | -0.080139000 | -1.571861000 | 1.602159000  | H  | -0.227394000 | 1.994625000  | -7.374135000 |
| H                             | 0.873156000  | -1.910253000 | 2.024054000  | C  | 0.311703000  | 0.497678000  | -5.914951000 |
| H                             | -0.846651000 | -2.306931000 | 1.863931000  | H  | -0.272138000 | -0.287655000 | -6.389606000 |
| H                             | 0.039627000  | -1.574412000 | 0.512176000  | C  | 1.031979000  | 0.202212000  | -4.748656000 |
| C                             | -1.629349000 | -0.010646000 | 2.854708000  | C  | 0.992226000  | -1.184811000 | -4.151115000 |
| H                             | -2.269614000 | -0.865763000 | 3.059017000  | H  | 1.994918000  | -1.619699000 | -4.071892000 |
| C                             | -1.983148000 | 1.253567000  | 3.332776000  | H  | 0.377974000  | -1.853569000 | -4.761038000 |
| H                             | -2.896091000 | 1.385175000  | 3.907385000  | H  | 0.575416000  | -1.170390000 | -3.136059000 |
| C                             | -1.154672000 | 2.347035000  | 3.068804000  | F  | -0.171885000 | 1.600083000  | -1.436404000 |
| H                             | -1.424810000 | 3.333127000  | 3.439614000  | F  | -3.911006000 | -1.076515000 | -1.467649000 |
| C                             | 0.028549000  | 2.196187000  | 2.331485000  | Ag | -1.904149000 | 0.247003000  | -1.441317000 |
| C                             | 0.918174000  | 3.384907000  | 2.053404000  | C  | -6.992171000 | 1.620768000  | -0.992949000 |
| H                             | 1.050568000  | 3.542046000  | 0.976569000  | H  | -7.441293000 | 2.362419000  | -1.647192000 |
| H                             | 1.919612000  | 3.244607000  | 2.476059000  | C  | -7.508206000 | 0.320049000  | -0.955824000 |
| H                             | 0.493648000  | 4.297188000  | 2.482301000  | H  | -8.356450000 | 0.053181000  | -1.579129000 |
| C                             | 2.690267000  | 0.407677000  | 1.654119000  | C  | -6.932064000 | -0.636575000 | -0.112894000 |
| O                             | 2.900322000  | 0.207271000  | 2.874422000  | H  | -7.332580000 | -1.645432000 | -0.077804000 |
| C                             | 3.844231000  | 0.252800000  | 0.677894000  | C  | -5.834480000 | -0.290972000 | 0.692488000  |
| C                             | 5.154473000  | -0.092799000 | 1.011527000  | H  | -4.560071000 | -0.790391000 | -0.833249000 |
| H                             | 5.421346000  | -0.270479000 | 2.046595000  | H  | -5.407814000 | -1.023019000 | 1.373475000  |
| C                             | 6.091866000  | -0.199900000 | -0.023420000 | C  | -5.317437000 | 1.014685000  | 0.651043000  |
| H                             | 7.119134000  | -0.466128000 | 0.206131000  | H  | -4.471156000 | 1.280901000  | 1.277596000  |
| C                             | 5.714780000  | 0.030859000  | -1.352296000 | C  | -5.897319000 | 1.968305000  | -0.193267000 |
| H                             | 6.420907000  | -0.049999000 | -2.170202000 | H  | -5.498268000 | 2.977730000  | -0.225864000 |

## VII) Difluorination of PPh<sub>3</sub> by two separated 1F<sub>S</sub>

|                               |             |              |              |   |              |              |             |
|-------------------------------|-------------|--------------|--------------|---|--------------|--------------|-------------|
| <sup>2</sup> RC <sub>PF</sub> |             |              |              | C | -1.065911000 | 0.080927000  | 3.007950000 |
| Ni                            | 0.274928000 | -0.086309000 | 0.387427000  | C | -1.696775000 | -1.101191000 | 3.449428000 |
| N                             | 0.148147000 | -0.015521000 | 2.266209000  | C | -1.097885000 | -2.456475000 | 3.160287000 |
| N                             | 2.096575000 | -0.201127000 | 0.718930000  | H | -0.120405000 | -2.574693000 | 3.642194000 |
| N                             | 0.805516000 | -0.219899000 | -1.415177000 | H | -1.750760000 | -3.252979000 | 3.526320000 |

|   |              |              |              |                                |               |              |              |
|---|--------------|--------------|--------------|--------------------------------|---------------|--------------|--------------|
| H | -0.944232000 | -2.605173000 | 2.085675000  | C                              | -6.360269000  | 1.677871000  | -0.245393000 |
| C | -2.893665000 | -0.983866000 | 4.168019000  | C                              | -7.222802000  | 0.609581000  | -2.797093000 |
| H | -3.392058000 | -1.884731000 | 4.516217000  | C                              | -6.864612000  | -1.955054000 | -1.009944000 |
| C | -3.449505000 | 0.268857000  | 4.437254000  | C                              | -6.973375000  | 1.171786000  | 0.912615000  |
| H | -4.379057000 | 0.342220000  | 4.994716000  | C                              | -8.511845000  | 1.044969000  | -2.448266000 |
| C | -2.811663000 | 1.427074000  | 3.987459000  | C                              | -4.584697000  | -1.518819000 | -0.326374000 |
| H | -3.245663000 | 2.401309000  | 4.196447000  | C                              | -6.150807000  | 3.065999000  | -0.343216000 |
| C | -1.613437000 | 1.355442000  | 3.265029000  | C                              | -7.000688000  | 0.151718000  | -4.109310000 |
| C | -0.927362000 | 2.609706000  | 2.780480000  | C                              | -6.780748000  | -3.241672000 | -0.466576000 |
| H | -0.819934000 | 2.609396000  | 1.690163000  | C                              | -7.376587000  | 2.032045000  | 1.940053000  |
| H | 0.079984000  | 2.706374000  | 3.201329000  | C                              | -9.552805000  | 1.014132000  | -3.383330000 |
| H | -1.498556000 | 3.496542000  | 3.066815000  | C                              | -4.506505000  | -2.800721000 | 0.226774000  |
| C | 1.345787000  | -0.062577000 | 2.946599000  | C                              | -6.564819000  | 3.927569000  | 0.676342000  |
| O | 1.502708000  | -0.020495000 | 4.166777000  | C                              | -8.042300000  | 0.107492000  | -5.039768000 |
| C | 2.502359000  | -0.175289000 | 1.988941000  | C                              | -5.602966000  | -3.666968000 | 0.156164000  |
| C | 3.862146000  | -0.253365000 | 2.276152000  | C                              | -7.177603000  | 3.411316000  | 1.823697000  |
| H | 4.200499000  | -0.232950000 | 3.305519000  | C                              | -9.322964000  | 0.541891000  | -4.679151000 |
| C | 4.756879000  | -0.357848000 | 1.202780000  | H                              | -7.786646000  | -1.639085000 | -1.488139000 |
| H | 5.822365000  | -0.419745000 | 1.396684000  | H                              | -7.138343000  | 0.103972000  | 1.017428000  |
| C | 4.289960000  | -0.385033000 | -0.118171000 | H                              | -8.708977000  | 1.410185000  | -1.445207000 |
| H | 4.963232000  | -0.467490000 | -0.963435000 | H                              | -3.715245000  | -0.866214000 | -0.278410000 |
| C | 2.916304000  | -0.302917000 | -0.327979000 | H                              | -5.659981000  | 3.476374000  | -1.222737000 |
| C | 2.163092000  | -0.317227000 | -1.631822000 | H                              | -6.005889000  | -0.172187000 | -4.406351000 |
| O | 2.731607000  | -0.407229000 | -2.719888000 | H                              | -7.636402000  | -3.908609000 | -0.528746000 |
| C | -0.076948000 | -0.229482000 | -2.535439000 | H                              | -7.848069000  | 1.622637000  | 2.829352000  |
| C | -0.432390000 | 0.993959000  | -3.141532000 | H                              | -10.543259000 | 1.356267000  | -3.095682000 |
| C | 0.116853000  | 2.304186000  | -2.631141000 | H                              | -3.585237000  | -3.125441000 | 0.702269000  |
| H | -0.131376000 | 2.457313000  | -1.575072000 | H                              | -6.398946000  | 4.996931000  | 0.579830000  |
| H | -0.290889000 | 3.141841000  | -3.202859000 | H                              | -7.851619000  | -0.254587000 | -6.046229000 |
| H | 1.209345000  | 2.341148000  | -2.711755000 | H                              | -5.537990000  | -4.666181000 | 0.577575000  |
| C | -1.307815000 | 0.960526000  | -4.234817000 | H                              | -7.491476000  | 4.077739000  | 2.622083000  |
| H | -1.591217000 | 1.893893000  | -4.714074000 | H                              | -10.132102000 | 0.517699000  | -5.403543000 |
| C | -1.817935000 | -0.249828000 | -4.709803000 | <sup>2</sup> TS1 <sub>PF</sub> |               |              |              |
| H | -2.496975000 | -0.257586000 | -5.557794000 | Ni                             | -0.797476000  | 0.070480000  | 0.093984000  |
| C | -1.457082000 | -1.449850000 | -4.093098000 | N                              | -0.801035000  | 0.007141000  | 2.050739000  |
| H | -1.856129000 | -2.390970000 | -4.462256000 | N                              | 0.963084000   | 0.576279000  | 0.353518000  |
| C | -0.584414000 | -1.462284000 | -2.997192000 | N                              | -0.274718000  | 0.144230000  | -1.793564000 |
| C | -0.195013000 | -2.761126000 | -2.333605000 | C                              | -1.828900000  | -0.472582000 | 2.920009000  |
| H | 0.882648000  | -2.945557000 | -2.412665000 | C                              | -1.973908000  | -1.865048000 | 3.106387000  |
| H | -0.714924000 | -3.602786000 | -2.798409000 | C                              | -1.047257000  | -2.842171000 | 2.421309000  |
| H | -0.440305000 | -2.754195000 | -1.265866000 | H                              | -0.004811000  | -2.675348000 | 2.716234000  |
| F | -1.503423000 | 0.041460000  | 0.062416000  | H                              | -1.311474000  | -3.871319000 | 2.679621000  |
| P | -5.759588000 | 0.635186000  | -1.656637000 | H                              | -1.080180000  | -2.745752000 | 1.330387000  |
| C | -5.770244000 | -1.076389000 | -0.942902000 | C                              | -2.971598000  | -2.327682000 | 3.975289000  |

|   |              |              |              |                                |              |              |              |
|---|--------------|--------------|--------------|--------------------------------|--------------|--------------|--------------|
| H | -3.089140000 | -3.398097000 | 4.124026000  | C                              | -6.604940000 | -1.411374000 | 0.007955000  |
| C | -3.806568000 | -1.435406000 | 4.650579000  | C                              | -5.608393000 | 1.717069000  | 1.172975000  |
| H | -4.577821000 | -1.808989000 | 5.318720000  | C                              | -5.747608000 | 1.716699000  | -2.718167000 |
| C | -3.639591000 | -0.060666000 | 4.471319000  | C                              | -4.460409000 | -2.412108000 | 0.517383000  |
| H | -4.276934000 | 0.637273000  | 5.008787000  | C                              | -3.806072000 | 2.740490000  | -0.078303000 |
| C | -2.649234000 | 0.441693000  | 3.615521000  | C                              | -5.827308000 | -0.678739000 | -3.081735000 |
| C | -2.433889000 | 1.928869000  | 3.483390000  | C                              | -7.252826000 | -2.517794000 | 0.558438000  |
| H | -2.450839000 | 2.248713000  | 2.437855000  | C                              | -5.828224000 | 2.927430000  | 1.837097000  |
| H | -1.459548000 | 2.217822000  | 3.894206000  | C                              | -6.433053000 | 1.914910000  | -3.918903000 |
| H | -3.207149000 | 2.481776000  | 4.022759000  | C                              | -5.112547000 | -3.525309000 | 1.055230000  |
| C | 0.366196000  | 0.364804000  | 2.632873000  | C                              | -4.033765000 | 3.951385000  | 0.580862000  |
| O | 0.644973000  | 0.384642000  | 3.848095000  | C                              | -6.519180000 | -0.474314000 | -4.273719000 |
| C | 1.401000000  | 0.736353000  | 1.606822000  | C                              | -6.507807000 | -3.581900000 | 1.079015000  |
| C | 2.704252000  | 1.168396000  | 1.839051000  | C                              | -5.048726000 | 4.048490000  | 1.537275000  |
| H | 3.053846000  | 1.291471000  | 2.857413000  | C                              | -6.826817000 | 0.824335000  | -4.702499000 |
| C | 3.524336000  | 1.426208000  | 0.734115000  | H                              | -7.198244000 | -0.605371000 | -0.410192000 |
| H | 4.544162000  | 1.764990000  | 0.885468000  | H                              | -6.226377000 | 0.859739000  | 1.416690000  |
| C | 3.036756000  | 1.242667000  | -0.565252000 | H                              | -5.464620000 | 2.580496000  | -2.126598000 |
| H | 3.648282000  | 1.424876000  | -1.441212000 | H                              | -3.378521000 | -2.384760000 | 0.509689000  |
| C | 1.722770000  | 0.808971000  | -0.722076000 | H                              | -3.013687000 | 2.680037000  | -0.817676000 |
| C | 1.005620000  | 0.522081000  | -2.012620000 | H                              | -5.587601000 | -1.693453000 | -2.777297000 |
| O | 1.602185000  | 0.624037000  | -3.102432000 | H                              | -8.338215000 | -2.549544000 | 0.574697000  |
| C | -1.047196000 | -0.207448000 | -2.942559000 | H                              | -6.610743000 | 2.991478000  | 2.587552000  |
| C | -1.558740000 | 0.803265000  | -3.786559000 | H                              | -6.667066000 | 2.927273000  | -4.237469000 |
| C | -1.297604000 | 2.262923000  | -3.503925000 | H                              | -4.525234000 | -4.346048000 | 1.455447000  |
| H | -1.445025000 | 2.503973000  | -2.446845000 | H                              | -3.416399000 | 4.813762000  | 0.347276000  |
| H | -1.956016000 | 2.899496000  | -4.101396000 | H                              | -6.814816000 | -1.330601000 | -4.873886000 |
| H | -0.260934000 | 2.526547000  | -3.745010000 | H                              | -7.012244000 | -4.447209000 | 1.498878000  |
| C | -2.284828000 | 0.425412000  | -4.924567000 | H                              | -5.225967000 | 4.988963000  | 2.050659000  |
| H | -2.680745000 | 1.198002000  | -5.579200000 | H                              | -7.361245000 | 0.982336000  | -5.634543000 |
| C | -2.503303000 | -0.919977000 | -5.225249000 | <sup>2</sup> IM1 <sub>PF</sub> |              |              |              |
| H | -3.069810000 | -1.196316000 | -6.110223000 | Ni                             | 0.402509000  | -0.670437000 | -0.244599000 |
| C | -1.991474000 | -1.909336000 | -4.383251000 | N                              | 0.618170000  | -1.399009000 | 1.628639000  |
| H | -2.151948000 | -2.958363000 | -4.619803000 | N                              | 2.178091000  | -0.020502000 | 0.123203000  |
| C | -1.256422000 | -1.573239000 | -3.237848000 | N                              | 0.757607000  | 0.268523000  | -1.998010000 |
| C | -0.666007000 | -2.659124000 | -2.368928000 | C                              | -0.314379000 | -2.189892000 | 2.348031000  |
| H | 0.419153000  | -2.545406000 | -2.269851000 | C                              | -0.140629000 | -3.591183000 | 2.450702000  |
| H | -0.868015000 | -3.645601000 | -2.795545000 | C                              | 1.074654000  | -4.260950000 | 1.855206000  |
| H | -1.077658000 | -2.641734000 | -1.353784000 | H                              | 1.991132000  | -3.944918000 | 2.366094000  |
| F | -2.864157000 | -0.249340000 | -0.275767000 | H                              | 0.997601000  | -5.349424000 | 1.933302000  |
| P | -4.362809000 | 0.090825000  | -0.788335000 | H                              | 1.198435000  | -3.997441000 | 0.797981000  |
| C | -5.197394000 | -1.342406000 | -0.017448000 | C                              | -1.115355000 | -4.350028000 | 3.114069000  |
| C | -4.600506000 | 1.614408000  | 0.201448000  | H                              | -0.982553000 | -5.426949000 | 3.192064000  |
| C | -5.454481000 | 0.412170000  | -2.261264000 | C                              | -2.246951000 | -3.747680000 | 3.670126000  |

|   |              |              |              |                               |              |              |              |
|---|--------------|--------------|--------------|-------------------------------|--------------|--------------|--------------|
| H | -2.992956000 | -4.350111000 | 4.181503000  | C                             | -4.251202000 | -3.297378000 | -2.645243000 |
| C | -2.411063000 | -2.364521000 | 3.562083000  | C                             | -6.439039000 | -0.679858000 | 1.410572000  |
| H | -3.287478000 | -1.887523000 | 3.995120000  | C                             | -5.580957000 | -0.042357000 | -3.297237000 |
| C | -1.458315000 | -1.571679000 | 2.906186000  | C                             | -2.795852000 | -2.891718000 | -0.721314000 |
| C | -1.640428000 | -0.075710000 | 2.809071000  | C                             | -6.730581000 | -3.365577000 | 2.175085000  |
| H | -1.627394000 | 0.259881000  | 1.764688000  | C                             | -8.361751000 | -0.358151000 | -3.057888000 |
| H | -0.828288000 | 0.460267000  | 3.314137000  | C                             | -3.398870000 | -4.319736000 | -3.064487000 |
| H | -2.586965000 | 0.232845000  | 3.262797000  | C                             | -7.121384000 | -1.003179000 | 2.581785000  |
| C | 1.796642000  | -1.107711000 | 2.210843000  | C                             | -6.427999000 | 0.435409000  | -4.295086000 |
| O | 2.188604000  | -1.422093000 | 3.365427000  | C                             | -1.950203000 | -3.909071000 | -1.158895000 |
| C | 2.712767000  | -0.291893000 | 1.316092000  | C                             | -7.269337000 | -2.342868000 | 2.961239000  |
| C | 3.993695000  | 0.172365000  | 1.624267000  | C                             | -7.814224000 | 0.275799000  | -4.177006000 |
| H | 4.436990000  | -0.041278000 | 2.590288000  | C                             | -2.252119000 | -4.623076000 | -2.324635000 |
| C | 4.676400000  | 0.915104000  | 0.649875000  | H                             | -5.614437000 | -3.852823000 | 0.400228000  |
| H | 5.674360000  | 1.288361000  | 0.859894000  | H                             | -7.955426000 | -1.323460000 | -1.177550000 |
| C | 4.082463000  | 1.182530000  | -0.592390000 | H                             | -5.137080000 | -3.061464000 | -3.224807000 |
| H | 4.595612000  | 1.756623000  | -1.355523000 | H                             | -6.326642000 | 0.360284000  | 1.121944000  |
| C | 2.797838000  | 0.685853000  | -0.825215000 | H                             | -4.507273000 | 0.085316000  | -3.397207000 |
| C | 1.965154000  | 0.856223000  | -2.083734000 | H                             | -2.554450000 | -2.348641000 | 0.187475000  |
| O | 2.443863000  | 1.503560000  | -3.052441000 | H                             | -6.843072000 | -4.402685000 | 2.473548000  |
| C | -0.106231000 | 0.347818000  | -3.121964000 | H                             | -9.436214000 | -0.479867000 | -2.968356000 |
| C | -1.125925000 | 1.326922000  | -3.149546000 | H                             | -3.629604000 | -4.872862000 | -3.969009000 |
| C | -1.253970000 | 2.327631000  | -2.025687000 | H                             | -7.536210000 | -0.211347000 | 3.196895000  |
| H | -1.401810000 | 1.825855000  | -1.061611000 | H                             | -6.006631000 | 0.930485000  | -5.163872000 |
| H | -2.097597000 | 3.002570000  | -2.198233000 | H                             | -1.058473000 | -4.143419000 | -0.587647000 |
| H | -0.346701000 | 2.933977000  | -1.923003000 | H                             | -7.803584000 | -2.588273000 | 3.873940000  |
| C | -2.008664000 | 1.360047000  | -4.238946000 | H                             | -8.467834000 | 0.647856000  | -4.959979000 |
| H | -2.787102000 | 2.119619000  | -4.265269000 | H                             | -1.589611000 | -5.416366000 | -2.656992000 |
| C | -1.896152000 | 0.442516000  | -5.286970000 | <sup>4</sup> RC <sub>PF</sub> |              |              |              |
| H | -2.586450000 | 0.480758000  | -6.125472000 | Ni                            | -0.712551000 | 0.002199000  | 0.148432000  |
| C | -0.887056000 | -0.523431000 | -5.248717000 | N                             | -0.467564000 | -0.255108000 | 2.232600000  |
| H | -0.793414000 | -1.240825000 | -6.061115000 | N                             | 1.276819000  | 0.006449000  | 0.322828000  |
| C | 0.016100000  | -0.585376000 | -4.178038000 | N                             | -0.125629000 | 0.365266000  | -1.832337000 |
| C | 1.103895000  | -1.632328000 | -4.150166000 | C                             | -1.490795000 | -0.366349000 | 3.213188000  |
| H | 2.099376000  | -1.174414000 | -4.172140000 | C                             | -1.867965000 | -1.635496000 | 3.707734000  |
| H | 1.019667000  | -2.305380000 | -5.008529000 | C                             | -1.175488000 | -2.886846000 | 3.222542000  |
| H | 1.054419000  | -2.231615000 | -3.233306000 | H                             | -0.115894000 | -2.888332000 | 3.502064000  |
| F | -4.090293000 | -0.067561000 | -0.513526000 | H                             | -1.640837000 | -3.779804000 | 3.649861000  |
| P | -5.043747000 | -1.296102000 | -0.895155000 | H                             | -1.215957000 | -2.967426000 | 2.130150000  |
| C | -5.894080000 | -1.711607000 | 0.621488000  | C                             | -2.891505000 | -1.712995000 | 4.662937000  |
| C | -6.135164000 | -0.677200000 | -2.167770000 | H                             | -3.177821000 | -2.687340000 | 5.052710000  |
| C | -3.948546000 | -2.584375000 | -1.471181000 | C                             | -3.542127000 | -0.563964000 | 5.118819000  |
| C | -6.037255000 | -3.056835000 | 1.003768000  | H                             | -4.335079000 | -0.640889000 | 5.857894000  |
| C | -7.527139000 | -0.834947000 | -2.045984000 | C                             | -3.166806000 | 0.684180000  | 4.616749000  |

|   |              |              |              |                                |              |              |              |
|---|--------------|--------------|--------------|--------------------------------|--------------|--------------|--------------|
| H | -3.667186000 | 1.583046000  | 4.969657000  | C                              | -4.608978000 | 2.556400000  | -0.780092000 |
| C | -2.142194000 | 0.802503000  | 3.666546000  | C                              | -5.570913000 | -1.449548000 | -3.332210000 |
| C | -1.728094000 | 2.160973000  | 3.151419000  | C                              | -7.248658000 | -3.227216000 | 0.567959000  |
| H | -1.860796000 | 2.237985000  | 2.066015000  | C                              | -6.160632000 | 2.833237000  | 1.535965000  |
| H | -0.669351000 | 2.360433000  | 3.352547000  | C                              | -7.034765000 | 0.694965000  | -4.379225000 |
| H | -2.318951000 | 2.951588000  | 3.622912000  | C                              | -5.383572000 | -2.900123000 | 2.080733000  |
| C | 0.804672000  | -0.314381000 | 2.655495000  | C                              | -4.804889000 | 3.817114000  | -0.217258000 |
| O | 1.229242000  | -0.454552000 | 3.828235000  | C                              | -6.156284000 | -1.555389000 | -4.591983000 |
| C | 1.813188000  | -0.173298000 | 1.532289000  | C                              | -6.560263000 | -3.573490000 | 1.735590000  |
| C | 3.200081000  | -0.204950000 | 1.685411000  | C                              | -5.580184000 | 3.957436000  | 0.940050000  |
| H | 3.630502000  | -0.349735000 | 2.669143000  | C                              | -6.888588000 | -0.484230000 | -5.118124000 |
| C | 3.994709000  | -0.044471000 | 0.544396000  | H                              | -7.312529000 | -1.945109000 | -1.153438000 |
| H | 5.076637000  | -0.066474000 | 0.632447000  | H                              | -6.430531000 | 0.700482000  | 1.445437000  |
| C | 3.402136000  | 0.148799000  | -0.708997000 | H                              | -6.589146000 | 1.724074000  | -2.546491000 |
| H | 3.991622000  | 0.281979000  | -1.608295000 | H                              | -3.961402000 | -1.376598000 | 1.515642000  |
| C | 2.008833000  | 0.170308000  | -0.781824000 | H                              | -3.992850000 | 2.452423000  | -1.668137000 |
| C | 1.199675000  | 0.387566000  | -2.045029000 | H                              | -4.993706000 | -2.280483000 | -2.938045000 |
| O | 1.809588000  | 0.571009000  | -3.126178000 | H                              | -8.165157000 | -3.743404000 | 0.299121000  |
| C | -0.969663000 | 0.593143000  | -2.953643000 | H                              | -6.761450000 | 2.939453000  | 2.433947000  |
| C | -1.403187000 | 1.907135000  | -3.239815000 | H                              | -7.604689000 | 1.525603000  | -4.784056000 |
| C | -0.946267000 | 3.067299000  | -2.386641000 | H                              | -4.846125000 | -3.165956000 | 2.984933000  |
| H | -1.202713000 | 2.916784000  | -1.331562000 | H                              | -4.346877000 | 4.687295000  | -0.677047000 |
| H | -1.406051000 | 4.001611000  | -2.721683000 | H                              | -6.034165000 | -2.468727000 | -5.165781000 |
| H | 0.142091000  | 3.190863000  | -2.429718000 | H                              | -6.939336000 | -4.366126000 | 2.373795000  |
| C | -2.244873000 | 2.118247000  | -4.341395000 | H                              | -5.727417000 | 4.940123000  | 1.377828000  |
| H | -2.577066000 | 3.128776000  | -4.568219000 | H                              | -7.339887000 | -0.567173000 | -6.102167000 |
| C | -2.650919000 | 1.053975000  | -5.150197000 | <sup>4</sup> TS1 <sub>PF</sub> |              |              |              |
| H | -3.300201000 | 1.232181000  | -6.003056000 | Ni                             | -0.025163000 | 0.087327000  | 0.228427000  |
| C | -2.220297000 | -0.241142000 | -4.853473000 | N                              | 0.136327000  | 0.100163000  | 2.200764000  |
| H | -2.536709000 | -1.072931000 | -5.478305000 | N                              | 1.918476000  | 0.100504000  | 0.357835000  |
| C | -1.383204000 | -0.491970000 | -3.757147000 | N                              | 0.392392000  | 0.068264000  | -1.707085000 |
| C | -0.917769000 | -1.895563000 | -3.448937000 | C                              | -0.934812000 | 0.105934000  | 3.145544000  |
| H | 0.171984000  | -1.982442000 | -3.528026000 | C                              | -1.493676000 | -1.119638000 | 3.566600000  |
| H | -1.365772000 | -2.614723000 | -4.140729000 | C                              | -0.937925000 | -2.432471000 | 3.067678000  |
| H | -1.184105000 | -2.189759000 | -2.427231000 | H                              | 0.113699000  | -2.557690000 | 3.349795000  |
| F | -2.641730000 | -0.273282000 | 0.000621000  | H                              | -1.501840000 | -3.273838000 | 3.479911000  |
| P | -4.943922000 | -0.192951000 | -0.947353000 | H                              | -0.980342000 | -2.494627000 | 1.973927000  |
| C | -5.580442000 | -1.529564000 | 0.091047000  | C                              | -2.576897000 | -1.094121000 | 4.456688000  |
| C | -5.206057000 | 1.425055000  | -0.191069000 | H                              | -3.013079000 | -2.034110000 | 4.785950000  |
| C | -5.734096000 | -0.271382000 | -2.572134000 | C                              | -3.097741000 | 0.115798000  | 4.920935000  |
| C | -6.764252000 | -2.211877000 | -0.257195000 | H                              | -3.938076000 | 0.119778000  | 5.609827000  |
| C | -5.973518000 | 1.566428000  | 0.979080000  | C                              | -2.535950000 | 1.320817000  | 4.492838000  |
| C | -6.457159000 | 0.810083000  | -3.114322000 | H                              | -2.940523000 | 2.264736000  | 4.850114000  |
| C | -4.885405000 | -1.885090000 | 1.263343000  | C                              | -1.452437000 | 1.336831000  | 3.603031000  |

|   |              |              |              |                                |              |              |               |
|---|--------------|--------------|--------------|--------------------------------|--------------|--------------|---------------|
| C | -0.855460000 | 2.644905000  | 3.140762000  | C                              | -6.894899000 | -3.066991000 | 1.306196000   |
| H | -0.888102000 | 2.734827000  | 2.048689000  | C                              | -8.272413000 | 2.856767000  | 0.721618000   |
| H | 0.196839000  | 2.732923000  | 3.434053000  | C                              | -6.741011000 | 1.625210000  | -4.592625000  |
| H | -1.398200000 | 3.491767000  | 3.569814000  | C                              | -5.311787000 | -3.877770000 | -0.341022000  |
| C | 1.410630000  | 0.114218000  | 2.679298000  | C                              | -6.306126000 | 2.729763000  | 2.136562000   |
| O | 1.770407000  | 0.126272000  | 3.869988000  | C                              | -7.432712000 | -0.698735000 | -4.575772000  |
| C | 2.453793000  | 0.114329000  | 1.574903000  | C                              | -6.174569000 | -4.120512000 | 0.734381000   |
| C | 3.842389000  | 0.126031000  | 1.708964000  | C                              | -7.572372000 | 3.259848000  | 1.864384000   |
| H | 4.300619000  | 0.137200000  | 2.691001000  | C                              | -7.328636000 | 0.529683000  | -5.237320000  |
| C | 4.611173000  | 0.122785000  | 0.535751000  | H                              | -7.325037000 | -0.958822000 | 1.254061000   |
| H | 5.694217000  | 0.131894000  | 0.607051000  | H                              | -8.265126000 | 1.609751000  | -1.031513000  |
| C | 4.003303000  | 0.107311000  | -0.728191000 | H                              | -5.789693000 | 2.345192000  | -2.805579000  |
| H | 4.587615000  | 0.103797000  | -1.640828000 | H                              | -4.481362000 | -2.400594000 | -1.665628000  |
| C | 2.608931000  | 0.096066000  | -0.778225000 | H                              | -4.739361000 | 1.397585000  | 1.441687000   |
| C | 1.720224000  | 0.072973000  | -2.010255000 | H                              | -7.048734000 | -1.794901000 | -2.767285000  |
| O | 2.235201000  | 0.057226000  | -3.142393000 | H                              | -7.563226000 | -3.252090000 | 2.141630000   |
| C | -0.533866000 | 0.028945000  | -2.793385000 | H                              | -9.254607000 | 3.267847000  | 0.508924000   |
| C | -0.987480000 | 1.235618000  | -3.367377000 | H                              | -6.653676000 | 2.578468000  | -5.104669000  |
| C | -0.477124000 | 2.566824000  | -2.868960000 | H                              | -4.744723000 | -4.692120000 | -0.781345000  |
| H | -0.675205000 | 2.694979000  | -1.798423000 | H                              | -5.758688000 | 3.050305000  | 3.017762000   |
| H | -0.954972000 | 3.390852000  | -3.406057000 | H                              | -7.891516000 | -1.548524000 | -5.071937000  |
| H | 0.606751000  | 2.657625000  | -3.003335000 | H                              | -6.280544000 | -5.126941000 | 1.128037000   |
| C | -1.921837000 | 1.173282000  | -4.410923000 | H                              | -8.011219000 | 3.989869000  | 2.538132000   |
| H | -2.275215000 | 2.098291000  | -4.860087000 | H                              | -7.700774000 | 0.632853000  | -6.252109000? |
| C | -2.400152000 | -0.053758000 | -4.876148000 | <sup>4</sup> IM1 <sub>PF</sub> |              |              |               |
| H | -3.123849000 | -0.085735000 | -5.685981000 | Ni                             | -0.123251000 | 0.059788000  | 0.162564000   |
| C | -1.946587000 | -1.239353000 | -4.293703000 | N                              | 0.025067000  | 0.058993000  | 2.129446000   |
| H | -2.318160000 | -2.196383000 | -4.652018000 | N                              | 1.816841000  | 0.065645000  | 0.297067000   |
| C | -1.012127000 | -1.218511000 | -3.248520000 | N                              | 0.292001000  | 0.058598000  | -1.766988000  |
| C | -0.524715000 | -2.505210000 | -2.625348000 | C                              | -1.051970000 | 0.053940000  | 3.067651000   |
| H | 0.557554000  | -2.627279000 | -2.748178000 | C                              | -1.606223000 | -1.177086000 | 3.479231000   |
| H | -1.016614000 | -3.368201000 | -3.082652000 | C                              | -1.039664000 | -2.484541000 | 2.978267000   |
| H | -0.723857000 | -2.528270000 | -1.547492000 | H                              | 0.009917000  | -2.605951000 | 3.269566000   |
| F | -3.267511000 | 0.441693000  | 0.002195000  | H                              | -1.602959000 | -3.330706000 | 3.381327000   |
| P | -5.679718000 | 0.141717000  | -0.948268000 | H                              | -1.071639000 | -2.541904000 | 1.883974000   |
| C | -5.904054000 | -1.524905000 | -0.281997000 | C                              | -2.692542000 | -1.162034000 | 4.365752000   |
| C | -6.443381000 | 1.380953000  | 0.127528000  | H                              | -3.124983000 | -2.106057000 | 4.688265000   |
| C | -6.374433000 | 0.262258000  | -2.613874000 | C                              | -3.220556000 | 0.042547000  | 4.835627000   |
| C | -6.760920000 | -1.769757000 | 0.805868000  | H                              | -4.063251000 | 0.038287000  | 5.521573000   |
| C | -7.713268000 | 1.921181000  | -0.150897000 | C                              | -2.662769000 | 1.252771000  | 4.417355000   |
| C | -6.255870000 | 1.493858000  | -3.292844000 | H                              | -3.072308000 | 2.192362000  | 4.780186000   |
| C | -5.167766000 | -2.585024000 | -0.844672000 | C                              | -1.576414000 | 1.279600000  | 3.531263000   |
| C | -5.734243000 | 1.797013000  | 1.269845000  | C                              | -0.980360000 | 2.593187000  | 3.083437000   |
| C | -6.953749000 | -0.840206000 | -3.272487000 | H                              | -1.006894000 | 2.693494000  | 1.992089000   |



|   |              |              |              |                                 |              |              |              |
|---|--------------|--------------|--------------|---------------------------------|--------------|--------------|--------------|
| H | 0.070174000  | 2.680735000  | 3.383145000  | C                               | -6.828545000 | 1.502449000  | -4.437650000 |
| H | -1.527106000 | 3.434878000  | 3.517442000  | C                               | -5.031390000 | -3.758593000 | 0.304863000  |
| C | 1.297766000  | 0.063316000  | 2.615302000  | C                               | -5.948156000 | 2.980563000  | 2.097496000  |
| O | 1.649890000  | 0.062816000  | 3.807771000  | C                               | -7.127423000 | -0.897830000 | -4.403816000 |
| C | 2.347160000  | 0.068432000  | 1.516143000  | C                               | -6.298541000 | -4.011674000 | 0.839623000  |
| C | 3.735405000  | 0.074117000  | 1.654266000  | C                               | -7.251372000 | 3.416647000  | 1.839185000  |
| H | 4.191539000  | 0.076357000  | 2.637350000  | C                               | -7.247161000 | 0.325045000  | -5.072715000 |
| C | 4.507176000  | 0.076985000  | 0.482786000  | H                               | -7.694034000 | -0.936794000 | 0.422676000  |
| H | 5.590018000  | 0.081608000  | 0.557273000  | H                               | -7.932198000 | 1.510164000  | -0.891247000 |
| C | 3.903402000  | 0.073806000  | -0.783434000 | H                               | -5.958882000 | 2.377423000  | -2.682567000 |
| H | 4.491050000  | 0.075812000  | -1.693948000 | H                               | -3.728830000 | -2.295249000 | -0.590206000 |
| C | 2.509155000  | 0.067969000  | -0.837646000 | H                               | -4.338829000 | 1.687792000  | 1.487384000  |
| C | 1.620567000  | 0.063382000  | -2.070688000 | H                               | -6.521677000 | -1.908485000 | -2.608739000 |
| O | 2.134432000  | 0.064247000  | -3.202863000 | H                               | -8.237709000 | -3.178481000 | 1.298920000  |
| C | -0.637968000 | 0.052598000  | -2.850785000 | H                               | -8.972856000 | 3.205315000  | 0.551561000  |
| C | -1.115292000 | 1.278304000  | -3.362278000 | H                               | -6.910398000 | 2.456904000  | -4.950163000 |
| C | -0.626691000 | 2.592185000  | -2.799673000 | H                               | -4.285142000 | -4.547037000 | 0.272053000  |
| H | -0.824341000 | 2.665258000  | -1.723773000 | H                               | -5.391723000 | 3.390399000  | 2.935356000  |
| H | -1.119563000 | 3.433102000  | -3.295379000 | H                               | -7.446986000 | -1.816836000 | -4.887466000 |
| H | 0.455267000  | 2.708382000  | -2.930225000 | H                               | -6.540164000 | -4.998188000 | 1.224490000  |
| C | -2.050442000 | 1.251375000  | -4.406589000 | H                               | -7.712996000 | 4.166942000  | 2.474459000  |
| H | -2.421988000 | 2.191004000  | -4.808112000 | H                               | -7.654583000 | 0.361468000  | -6.078679000 |
| C | -2.506302000 | 0.040639000  | -4.932738000 | <sup>2</sup> (L)Ni <sup>I</sup> |              |              |              |
| H | -3.230945000 | 0.036057000  | -5.742241000 | Ni                              | -0.062714000 | 0.060858000  | 0.012519000  |
| C | -2.030255000 | -1.164215000 | -4.410921000 | N                               | 0.034216000  | -0.068028000 | 2.022424000  |
| H | -2.385778000 | -2.108523000 | -4.816051000 | N                               | 1.848143000  | 0.130415000  | 0.216063000  |
| C | -1.094364000 | -1.179146000 | -3.367015000 | N                               | 0.445216000  | 0.208445000  | -1.932226000 |
| C | -0.582878000 | -2.486764000 | -2.810189000 | C                               | -1.058251000 | -0.199554000 | 2.918984000  |
| H | 0.500965000  | -2.583315000 | -2.940910000 | C                               | -1.425440000 | -1.472787000 | 3.414850000  |
| H | -1.060674000 | -3.333976000 | -3.309934000 | C                               | -0.623896000 | -2.698157000 | 3.045649000  |
| H | -0.779358000 | -2.568310000 | -1.734652000 | H                               | 0.405868000  | -2.627553000 | 3.413511000  |
| F | -3.610948000 | 0.249447000  | -0.070248000 | H                               | -1.075836000 | -3.601104000 | 3.466852000  |
| P | -5.275881000 | 0.186377000  | -0.854088000 | H                               | -0.562471000 | -2.818289000 | 1.957326000  |
| C | -5.673020000 | -1.460054000 | -0.153199000 | C                               | -2.550899000 | -1.581037000 | 4.243838000  |
| C | -6.050588000 | 1.474807000  | 0.187476000  | H                               | -2.834070000 | -2.559950000 | 4.624670000  |
| C | -6.201612000 | 0.231768000  | -2.449726000 | C                               | -3.309787000 | -0.457308000 | 4.582349000  |
| C | -6.943759000 | -1.720631000 | 0.384587000  | H                               | -4.180313000 | -0.557453000 | 5.225187000  |
| C | -7.365104000 | 1.915794000  | -0.060902000 | C                               | -2.941904000 | 0.795158000  | 4.084352000  |
| C | -6.296432000 | 1.456436000  | -3.150322000 | H                               | -3.528279000 | 1.674337000  | 4.342449000  |
| C | -4.716990000 | -2.488012000 | -0.186363000 | C                               | -1.821871000 | 0.942952000  | 3.253660000  |
| C | -5.349258000 | 2.018378000  | 1.280780000  | C                               | -1.433894000 | 2.301769000  | 2.721102000  |
| C | -6.603125000 | -0.949469000 | -3.109737000 | H                               | -1.395047000 | 2.301059000  | 1.624706000  |
| C | -7.253176000 | -2.990237000 | 0.880724000  | H                               | -0.436013000 | 2.598733000  | 3.064626000  |
| C | -7.957748000 | 2.879212000  | 0.758657000  | H                               | -2.147017000 | 3.066196000  | 3.043931000  |

|                                 |              |              |              |                                 |              |              |              |
|---------------------------------|--------------|--------------|--------------|---------------------------------|--------------|--------------|--------------|
| C                               | 1.281879000  | -0.046210000 | 2.525594000  | C                               | -2.843984000 | 1.019237000  | 3.983382000  |
| O                               | 1.631512000  | -0.104946000 | 3.734467000  | H                               | -3.344256000 | 1.952905000  | 4.230536000  |
| C                               | 2.350278000  | 0.070970000  | 1.451739000  | C                               | -1.710137000 | 1.050028000  | 3.158636000  |
| C                               | 3.733567000  | 0.119654000  | 1.640179000  | C                               | -1.192132000 | 2.361974000  | 2.617714000  |
| H                               | 4.153402000  | 0.071920000  | 2.638645000  | H                               | -1.202005000 | 2.374518000  | 1.521172000  |
| C                               | 4.548819000  | 0.230765000  | 0.503961000  | H                               | -0.154634000 | 2.540354000  | 2.921864000  |
| H                               | 5.627987000  | 0.270875000  | 0.618891000  | H                               | -1.801346000 | 3.197582000  | 2.974666000  |
| C                               | 3.985072000  | 0.290454000  | -0.779285000 | C                               | 1.326870000  | -0.096243000 | 2.508033000  |
| H                               | 4.601616000  | 0.376133000  | -1.666974000 | O                               | 1.570694000  | -0.073490000 | 3.742208000  |
| C                               | 2.593330000  | 0.236009000  | -0.886772000 | C                               | 2.396672000  | -0.054814000 | 1.479769000  |
| C                               | 1.768913000  | 0.281081000  | -2.162296000 | C                               | 3.759448000  | 0.129816000  | 1.654096000  |
| O                               | 2.359665000  | 0.371888000  | -3.271396000 | H                               | 4.172659000  | 0.205088000  | 2.655845000  |
| C                               | -0.442145000 | 0.261702000  | -3.038890000 | C                               | 4.592556000  | 0.258034000  | 0.513732000  |
| C                               | -0.792905000 | 1.505967000  | -3.613881000 | H                               | 5.660702000  | 0.406510000  | 0.634617000  |
| C                               | -0.182659000 | 2.787339000  | -3.098116000 | C                               | 4.013278000  | 0.278595000  | -0.786136000 |
| H                               | -0.361422000 | 2.907241000  | -2.022791000 | H                               | 4.622149000  | 0.469705000  | -1.664876000 |
| H                               | -0.602792000 | 3.654954000  | -3.615540000 | C                               | 2.649058000  | 0.090717000  | -0.915764000 |
| H                               | 0.903787000  | 2.797716000  | -3.240284000 | C                               | 1.814087000  | 0.179531000  | -2.146585000 |
| C                               | -1.723743000 | 1.532416000  | -4.662008000 | O                               | 2.313995000  | 0.327395000  | -3.290468000 |
| H                               | -1.994508000 | 2.488958000  | -5.103802000 | C                               | -0.451472000 | 0.173330000  | -2.969423000 |
| C                               | -2.305868000 | 0.355865000  | -5.141447000 | C                               | -0.994095000 | 1.427439000  | -3.331804000 |
| H                               | -3.026578000 | 0.392789000  | -5.954038000 | C                               | -0.566333000 | 2.684687000  | -2.612098000 |
| C                               | -1.956106000 | -0.867683000 | -4.564822000 | H                               | -0.780254000 | 2.622626000  | -1.538449000 |
| H                               | -2.405711000 | -1.787766000 | -4.931816000 | H                               | -1.085515000 | 3.559302000  | -3.014831000 |
| C                               | -1.028150000 | -0.934050000 | -3.515604000 | H                               | 0.512174000  | 2.854148000  | -2.706480000 |
| C                               | -0.658296000 | -2.262540000 | -2.900052000 | C                               | -1.938185000 | 1.486395000  | -4.367164000 |
| H                               | 0.410564000  | -2.476452000 | -3.016783000 | H                               | -2.356557000 | 2.450444000  | -4.647649000 |
| H                               | -1.221888000 | -3.078103000 | -3.363035000 | C                               | -2.343591000 | 0.330473000  | -5.038824000 |
| H                               | -0.858193000 | -2.268739000 | -1.821302000 | H                               | -3.076144000 | 0.391223000  | -5.839291000 |
| <sup>4</sup> (L)Ni <sup>I</sup> |              |              |              | C                               | -1.802772000 | -0.904481000 | -4.672625000 |
| Ni                              | 0.015059000  | -0.173041000 | 0.007673000  | H                               | -2.115940000 | -1.807954000 | -5.191044000 |
| N                               | 0.056689000  | -0.153844000 | 1.959704000  | C                               | -0.857252000 | -1.002494000 | -3.641609000 |
| N                               | 1.900653000  | -0.169591000 | 0.203045000  | C                               | -0.286589000 | -2.345161000 | -3.250435000 |
| N                               | 0.462201000  | 0.085761000  | -1.882836000 | H                               | 0.802160000  | -2.369681000 | -3.371643000 |
| C                               | -1.059940000 | -0.164426000 | 2.839974000  | H                               | -0.716149000 | -3.143698000 | -3.862454000 |
| C                               | -1.548870000 | -1.390761000 | 3.346452000  | H                               | -0.489099000 | -2.572496000 | -2.196893000 |
| C                               | -0.862025000 | -2.690853000 | 3.001789000  | <sup>6</sup> (L)Ni <sup>I</sup> |              |              |              |
| H                               | 0.178378000  | -2.697235000 | 3.345240000  | Ni                              | 0.123915000  | 0.871871000  | 0.072607000  |
| H                               | -1.378762000 | -3.538126000 | 3.462120000  | N                               | 0.093669000  | 0.311223000  | 1.927300000  |
| H                               | -0.835474000 | -2.852109000 | 1.917452000  | N                               | 2.064259000  | 0.886077000  | 0.280823000  |
| C                               | -2.684376000 | -1.382341000 | 4.169258000  | N                               | 0.496845000  | 0.506757000  | -1.799350000 |
| H                               | -3.061316000 | -2.324674000 | 4.560472000  | C                               | -1.047853000 | 0.032536000  | 2.720567000  |
| C                               | -3.332943000 | -0.187226000 | 4.490287000  | C                               | -1.505488000 | -1.298150000 | 2.884814000  |
| H                               | -4.212164000 | -0.196169000 | 5.129007000  | C                               | -0.762674000 | -2.450319000 | 2.252392000  |

|                                  |              |              |              |    |              |              |              |
|----------------------------------|--------------|--------------|--------------|----|--------------|--------------|--------------|
| H                                | 0.244499000  | -2.550431000 | 2.671151000  | Ni | 0.145966000  | 0.073939000  | 0.033507000  |
| H                                | -1.296437000 | -3.392021000 | 2.410834000  | N  | 0.153723000  | 0.023378000  | 1.940733000  |
| H                                | -0.642963000 | -2.300366000 | 1.172985000  | N  | 1.952293000  | 0.124081000  | 0.220754000  |
| C                                | -2.670149000 | -1.531253000 | 3.629461000  | N  | 0.544813000  | 0.137504000  | -1.835704000 |
| H                                | -3.021990000 | -2.553075000 | 3.753694000  | C  | -1.035525000 | -0.031137000 | 2.719576000  |
| C                                | -3.382692000 | -0.476413000 | 4.205568000  | C  | -1.663021000 | -1.279757000 | 2.930564000  |
| H                                | -4.284007000 | -0.673606000 | 4.779890000  | C  | -1.052678000 | -2.553345000 | 2.393950000  |
| C                                | -2.929192000 | 0.833421000  | 4.034494000  | H  | -0.040258000 | -2.706964000 | 2.783963000  |
| H                                | -3.478607000 | 1.659049000  | 4.481255000  | H  | -1.659357000 | -3.419453000 | 2.671872000  |
| C                                | -1.767516000 | 1.106365000  | 3.297303000  | H  | -0.970079000 | -2.532398000 | 1.301279000  |
| C                                | -1.291825000 | 2.530780000  | 3.128320000  | C  | -2.859275000 | -1.313618000 | 3.659970000  |
| H                                | -1.313028000 | 2.842172000  | 2.076653000  | H  | -3.348274000 | -2.269193000 | 3.831750000  |
| H                                | -0.257133000 | 2.651415000  | 3.467131000  | C  | -3.424025000 | -0.141199000 | 4.167493000  |
| H                                | -1.923058000 | 3.219815000  | 3.697451000  | H  | -4.352247000 | -0.183817000 | 4.730594000  |
| C                                | 1.357221000  | 0.010311000  | 2.415509000  | C  | -2.794060000 | 1.086331000  | 3.948924000  |
| O                                | 1.591202000  | -0.421777000 | 3.582460000  | H  | -3.234006000 | 1.998687000  | 4.343659000  |
| C                                | 2.434251000  | 0.280730000  | 1.473142000  | C  | -1.597319000 | 1.163609000  | 3.223696000  |
| C                                | 3.848922000  | -0.138820000 | 1.640517000  | C  | -0.920990000 | 2.493773000  | 2.991994000  |
| H                                | 4.253557000  | -0.278283000 | 2.636896000  | H  | -0.760398000 | 2.680666000  | 1.924416000  |
| C                                | 4.643900000  | -0.271370000 | 0.495465000  | H  | 0.063294000  | 2.529390000  | 3.472697000  |
| H                                | 5.693936000  | -0.533049000 | 0.594907000  | H  | -1.524670000 | 3.310761000  | 3.396285000  |
| C                                | 4.111739000  | -0.000366000 | -0.771144000 | C  | 1.373161000  | 0.054454000  | 2.519371000  |
| H                                | 4.722804000  | -0.028917000 | -1.666540000 | O  | 1.655012000  | 0.035644000  | 3.731804000  |
| C                                | 2.687515000  | 0.410070000  | -0.864191000 | C  | 2.453810000  | 0.113695000  | 1.462553000  |
| C                                | 1.838841000  | 0.249298000  | -2.036995000 | C  | 3.834049000  | 0.151143000  | 1.640571000  |
| O                                | 2.322224000  | -0.056925000 | -3.166630000 | H  | 4.247172000  | 0.143674000  | 2.642586000  |
| C                                | -0.452068000 | 0.308265000  | -2.833201000 | C  | 4.649301000  | 0.197284000  | 0.501803000  |
| C                                | -1.091581000 | 1.432732000  | -3.409147000 | H  | 5.728211000  | 0.226562000  | 0.614053000  |
| C                                | -0.720610000 | 2.834144000  | -2.982071000 | C  | 4.084868000  | 0.205798000  | -0.780631000 |
| H                                | -0.982434000 | 3.020896000  | -1.933208000 | H  | 4.694585000  | 0.240131000  | -1.676050000 |
| H                                | -1.241213000 | 3.575781000  | -3.595367000 | C  | 2.697519000  | 0.167995000  | -0.891121000 |
| H                                | 0.357064000  | 3.008828000  | -3.069584000 | C  | 1.857534000  | 0.169903000  | -2.149060000 |
| C                                | -2.074914000 | 1.233469000  | -4.389274000 | O  | 2.383647000  | 0.201792000  | -3.276891000 |
| H                                | -2.561190000 | 2.098719000  | -4.834281000 | C  | -0.460743000 | 0.108863000  | -2.841678000 |
| C                                | -2.431130000 | -0.052282000 | -4.802055000 | C  | -1.159489000 | 1.298734000  | -3.148278000 |
| H                                | -3.194802000 | -0.191927000 | -5.562577000 | C  | -0.801541000 | 2.603932000  | -2.476455000 |
| C                                | -1.800203000 | -1.157846000 | -4.226000000 | H  | -0.963552000 | 2.559902000  | -1.393293000 |
| H                                | -2.078757000 | -2.162261000 | -4.537353000 | H  | -1.407923000 | 3.421828000  | -2.875108000 |
| C                                | -0.813456000 | -0.999614000 | -3.242857000 | H  | 0.253955000  | 2.855646000  | -2.627614000 |
| C                                | -0.163472000 | -2.210335000 | -2.617775000 | C  | -2.186999000 | 1.246578000  | -4.100063000 |
| H                                | 0.902060000  | -2.260859000 | -2.866951000 | H  | -2.728005000 | 2.156902000  | -4.345729000 |
| H                                | -0.641940000 | -3.131400000 | -2.963465000 | C  | -2.518656000 | 0.047071000  | -4.734028000 |
| H                                | -0.230874000 | -2.176153000 | -1.524208000 | H  | -3.318746000 | 0.022774000  | -5.468734000 |
| <sup>1</sup> (L)Ni <sup>II</sup> |              |              |              | C  | -1.820523000 | -1.121552000 | -4.420526000 |

|                                  |              |              |              |                                  |              |              |              |
|----------------------------------|--------------|--------------|--------------|----------------------------------|--------------|--------------|--------------|
| H                                | -2.079258000 | -2.055559000 | -4.912974000 | H                                | -1.159734000 | 3.519785000  | -3.168935000 |
| C                                | -0.787733000 | -1.112872000 | -3.473262000 | H                                | 0.448533000  | 2.864581000  | -2.817457000 |
| C                                | -0.040916000 | -2.381437000 | -3.137467000 | C                                | -1.951787000 | 1.379030000  | -4.450789000 |
| H                                | 1.014452000  | -2.308790000 | -3.423743000 | H                                | -2.386406000 | 2.321837000  | -4.773913000 |
| H                                | -0.475957000 | -3.237001000 | -3.661009000 | C                                | -2.323019000 | 0.189006000  | -5.080393000 |
| H                                | -0.065977000 | -2.587423000 | -2.061633000 | H                                | -3.045806000 | 0.203375000  | -5.891541000 |
| <sup>3</sup> (L)Ni <sup>II</sup> |              |              |              | C                                | -1.763446000 | -1.019999000 | -4.660800000 |
| Ni                               | -0.024099000 | 0.070371000  | 0.016331000  | H                                | -2.052108000 | -1.948494000 | -5.147351000 |
| N                                | 0.041001000  | 0.016879000  | 1.978343000  | C                                | -0.829792000 | -1.059784000 | -3.615474000 |
| N                                | 1.903849000  | 0.112168000  | 0.219523000  | C                                | -0.234591000 | -2.372665000 | -3.164656000 |
| N                                | 0.447435000  | 0.132074000  | -1.890249000 | H                                | 0.852626000  | -2.388924000 | -3.301460000 |
| C                                | -1.073277000 | -0.074428000 | 2.867009000  | H                                | -0.659138000 | -3.205673000 | -3.731709000 |
| C                                | -1.583411000 | -1.345855000 | 3.208206000  | H                                | -0.422342000 | -2.552185000 | -2.099633000 |
| C                                | -0.932945000 | -2.605474000 | 2.686475000  | <sup>5</sup> (L)Ni <sup>II</sup> |              |              |              |
| H                                | 0.110120000  | -2.685385000 | 3.013047000  | Ni                               | 0.024999000  | -0.351892000 | 0.028631000  |
| H                                | -1.466798000 | -3.491875000 | 3.039992000  | N                                | 0.061615000  | -0.143238000 | 2.010945000  |
| H                                | -0.922866000 | -2.627568000 | 1.590325000  | N                                | 1.840574000  | 0.263639000  | 0.193288000  |
| C                                | -2.709714000 | -1.416304000 | 4.040297000  | N                                | 0.476625000  | -0.158221000 | -1.979814000 |
| H                                | -3.108946000 | -2.391514000 | 4.308288000  | C                                | -1.037606000 | -0.372888000 | 2.883583000  |
| C                                | -3.319414000 | -0.257023000 | 4.525102000  | C                                | -1.310203000 | -1.688351000 | 3.320644000  |
| H                                | -4.191919000 | -0.327990000 | 5.168748000  | C                                | -0.407821000 | -2.830781000 | 2.918379000  |
| C                                | -2.804320000 | 0.993669000  | 4.177021000  | H                                | 0.611987000  | -2.687685000 | 3.293644000  |
| H                                | -3.277569000 | 1.897986000  | 4.551714000  | H                                | -0.783584000 | -3.780570000 | 3.309209000  |
| C                                | -1.679639000 | 1.105984000  | 3.347058000  | H                                | -0.331264000 | -2.914334000 | 1.827788000  |
| C                                | -1.131114000 | 2.462352000  | 2.971992000  | C                                | -2.430158000 | -1.912287000 | 4.133741000  |
| H                                | -1.121148000 | 2.603278000  | 1.884781000  | H                                | -2.643896000 | -2.922446000 | 4.474846000  |
| H                                | -0.098096000 | 2.587388000  | 3.315895000  | C                                | -3.268054000 | -0.859036000 | 4.508118000  |
| H                                | -1.734084000 | 3.260197000  | 3.414223000  | H                                | -4.133072000 | -1.047182000 | 5.138264000  |
| C                                | 1.294636000  | 0.031433000  | 2.514258000  | C                                | -2.990758000 | 0.436848000  | 4.065680000  |
| O                                | 1.598529000  | -0.005368000 | 3.718613000  | H                                | -3.643093000 | 1.258099000  | 4.352960000  |
| C                                | 2.387109000  | 0.096194000  | 1.457568000  | C                                | -1.880712000 | 0.699898000  | 3.250626000  |
| C                                | 3.769079000  | 0.133645000  | 1.645940000  | C                                | -1.594282000 | 2.102159000  | 2.768299000  |
| H                                | 4.191125000  | 0.121289000  | 2.644066000  | H                                | -1.572471000 | 2.151234000  | 1.673113000  |
| C                                | 4.581279000  | 0.187677000  | 0.502972000  | H                                | -0.618382000 | 2.455437000  | 3.119626000  |
| H                                | 5.660216000  | 0.217956000  | 0.617066000  | H                                | -2.357133000 | 2.799542000  | 3.125712000  |
| C                                | 4.024338000  | 0.204219000  | -0.784856000 | C                                | 1.256691000  | 0.247255000  | 2.512469000  |
| H                                | 4.644577000  | 0.246964000  | -1.672516000 | O                                | 1.536867000  | 0.433431000  | 3.716536000  |
| C                                | 2.633587000  | 0.164505000  | -0.890134000 | C                                | 2.312083000  | 0.448782000  | 1.436630000  |
| C                                | 1.784640000  | 0.178853000  | -2.152644000 | C                                | 3.642599000  | 0.763851000  | 1.644895000  |
| O                                | 2.332408000  | 0.233462000  | -3.266905000 | H                                | 4.023538000  | 0.917166000  | 2.647144000  |
| C                                | -0.461959000 | 0.151620000  | -2.991214000 | C                                | 4.490655000  | 0.857103000  | 0.492446000  |
| C                                | -1.020879000 | 1.381123000  | -3.402175000 | H                                | 5.542177000  | 1.093618000  | 0.625602000  |
| C                                | -0.626767000 | 2.673557000  | -2.726680000 | C                                | 3.994551000  | 0.646910000  | -0.777727000 |
| H                                | -0.852785000 | 2.650964000  | -1.654002000 | H                                | 4.635453000  | 0.711957000  | -1.650760000 |

|                                    |              |              |              |                                    |              |              |              |
|------------------------------------|--------------|--------------|--------------|------------------------------------|--------------|--------------|--------------|
| C                                  | 2.608466000  | 0.350719000  | -0.943364000 | C                                  | 2.370006000  | 0.123042000  | 1.454620000  |
| C                                  | 1.908929000  | 0.102680000  | -2.161363000 | C                                  | 3.749541000  | 0.182848000  | 1.638528000  |
| O                                  | 2.417989000  | -0.032847000 | -3.305541000 | H                                  | 4.158721000  | 0.163389000  | 2.641993000  |
| C                                  | -0.399817000 | 0.128144000  | -2.982377000 | C                                  | 4.567612000  | 0.266415000  | 0.504879000  |
| C                                  | -0.295839000 | 1.325061000  | -3.795786000 | H                                  | 5.645921000  | 0.314150000  | 0.619248000  |
| C                                  | 0.690363000  | 2.431112000  | -3.500287000 | C                                  | 4.001214000  | 0.288317000  | -0.775787000 |
| H                                  | 0.822304000  | 2.580162000  | -2.424832000 | H                                  | 4.608805000  | 0.351923000  | -1.671058000 |
| H                                  | 0.329853000  | 3.369314000  | -3.929737000 | C                                  | 2.613880000  | 0.225753000  | -0.885813000 |
| H                                  | 1.675288000  | 2.216059000  | -3.922575000 | C                                  | 1.791355000  | 0.235625000  | -2.150023000 |
| C                                  | -1.230677000 | 1.522880000  | -4.805797000 | O                                  | 2.344239000  | 0.306587000  | -3.270335000 |
| H                                  | -1.179865000 | 2.433404000  | -5.396121000 | C                                  | -0.459123000 | 0.162529000  | -2.941875000 |
| C                                  | -2.251215000 | 0.596588000  | -5.058729000 | C                                  | -0.971989000 | 1.388766000  | -3.416962000 |
| H                                  | -2.956146000 | 0.773101000  | -5.865505000 | C                                  | -0.506330000 | 2.698822000  | -2.826959000 |
| C                                  | -2.375525000 | -0.544781000 | -4.257521000 | H                                  | -0.679652000 | 2.733481000  | -1.745536000 |
| H                                  | -3.167514000 | -1.259518000 | -4.461419000 | H                                  | -1.032079000 | 3.540534000  | -3.286850000 |
| C                                  | -1.495956000 | -0.792219000 | -3.209553000 | H                                  | 0.569058000  | 2.846702000  | -2.979134000 |
| C                                  | -1.660929000 | -2.053440000 | -2.398942000 | C                                  | -1.919874000 | 1.368170000  | -4.450112000 |
| H                                  | -0.702633000 | -2.524621000 | -2.168188000 | H                                  | -2.319426000 | 2.309175000  | -4.820946000 |
| H                                  | -2.280615000 | -2.771906000 | -2.941364000 | C                                  | -2.354211000 | 0.161335000  | -5.003455000 |
| H                                  | -2.169213000 | -1.850998000 | -1.446150000 | H                                  | -3.090604000 | 0.160809000  | -5.802668000 |
| <sup>1</sup> (L)Ni <sup>II</sup> F |              |              |              | C                                  | -1.838505000 | -1.044855000 | -4.523404000 |
| Ni                                 | 0.028818000  | 0.060226000  | 0.023159000  | H                                  | -2.174396000 | -1.986429000 | -4.951491000 |
| N                                  | 0.077314000  | -0.013616000 | 1.966548000  | C                                  | -0.889217000 | -1.063945000 | -3.491517000 |
| N                                  | 1.857079000  | 0.146497000  | 0.216984000  | C                                  | -0.335578000 | -2.372552000 | -2.979825000 |
| N                                  | 0.476516000  | 0.160049000  | -1.868824000 | H                                  | 0.746535000  | -2.440494000 | -3.141197000 |
| C                                  | -1.058244000 | -0.110708000 | 2.819314000  | H                                  | -0.807094000 | -3.219050000 | -3.487302000 |
| C                                  | -1.588539000 | -1.382022000 | 3.125563000  | H                                  | -0.500920000 | -2.479628000 | -1.902005000 |
| C                                  | -0.938853000 | -2.635014000 | 2.588683000  | F                                  | -1.792654000 | -0.033029000 | -0.166343000 |
| H                                  | 0.088545000  | -2.742682000 | 2.955608000  | <sup>3</sup> (L)Ni <sup>II</sup> F |              |              |              |
| H                                  | -1.500636000 | -3.524051000 | 2.889384000  | Ni                                 | -0.168832000 | -0.118884000 | -0.006141000 |
| H                                  | -0.882361000 | -2.614167000 | 1.494705000  | N                                  | 0.009724000  | -0.091858000 | 2.057267000  |
| C                                  | -2.727956000 | -1.459596000 | 3.939057000  | N                                  | 1.807477000  | -0.008941000 | 0.203147000  |
| H                                  | -3.142086000 | -2.436157000 | 4.178884000  | N                                  | 0.427632000  | 0.148849000  | -1.976282000 |
| C                                  | -3.332554000 | -0.304608000 | 4.440917000  | C                                  | -1.065228000 | -0.123739000 | 2.988255000  |
| H                                  | -4.215903000 | -0.379749000 | 5.069453000  | C                                  | -1.523889000 | -1.359655000 | 3.496066000  |
| C                                  | -2.797288000 | 0.947511000  | 4.129447000  | C                                  | -0.848159000 | -2.651357000 | 3.100862000  |
| H                                  | -3.265874000 | 1.848826000  | 4.517677000  | H                                  | 0.200293000  | -2.669985000 | 3.419491000  |
| C                                  | -1.659140000 | 1.064504000  | 3.318580000  | H                                  | -1.354938000 | -3.509103000 | 3.552448000  |
| C                                  | -1.087628000 | 2.422566000  | 2.986608000  | H                                  | -0.850695000 | -2.785216000 | 2.012790000  |
| H                                  | -1.039628000 | 2.580764000  | 1.903267000  | C                                  | -2.622165000 | -1.367287000 | 4.367741000  |
| H                                  | -0.065579000 | 2.530953000  | 3.367429000  | H                                  | -2.978143000 | -2.316796000 | 4.760998000  |
| H                                  | -1.697887000 | 3.218184000  | 3.423562000  | C                                  | -3.261700000 | -0.179848000 | 4.732106000  |
| C                                  | 1.305058000  | 0.026500000  | 2.518202000  | H                                  | -4.112704000 | -0.201906000 | 5.407564000  |
| O                                  | 1.614107000  | -0.008719000 | 3.730143000  | C                                  | -2.801926000 | 1.035551000  | 4.219578000  |

|                                    |              |              |              |   |              |              |              |
|------------------------------------|--------------|--------------|--------------|---|--------------|--------------|--------------|
| H                                  | -3.296965000 | 1.963100000  | 4.497900000  | H | 0.521813000  | -2.650793000 | 3.287454000  |
| C                                  | -1.705937000 | 1.083042000  | 3.346050000  | H | -0.887879000 | -3.712047000 | 3.465231000  |
| C                                  | -1.219670000 | 2.402526000  | 2.794271000  | H | -0.563030000 | -2.892645000 | 1.925559000  |
| H                                  | -1.261843000 | 2.416704000  | 1.698754000  | C | -2.447045000 | -1.800514000 | 4.348780000  |
| H                                  | -0.176439000 | 2.595123000  | 3.069912000  | H | -2.669992000 | -2.804862000 | 4.701904000  |
| H                                  | -1.828743000 | 3.229423000  | 3.170897000  | C | -3.230874000 | -0.724213000 | 4.771969000  |
| C                                  | 1.269058000  | -0.088044000 | 2.535562000  | H | -4.062996000 | -0.887146000 | 5.451743000  |
| O                                  | 1.643437000  | -0.111354000 | 3.730123000  | C | -2.939638000 | 0.562691000  | 4.311950000  |
| C                                  | 2.314638000  | -0.024513000 | 1.437056000  | H | -3.549014000 | 1.403757000  | 4.635146000  |
| C                                  | 3.695354000  | 0.049558000  | 1.626489000  | C | -1.870956000 | 0.792291000  | 3.433870000  |
| H                                  | 4.107355000  | 0.034665000  | 2.628632000  | C | -1.571928000 | 2.186352000  | 2.935685000  |
| C                                  | 4.511097000  | 0.150599000  | 0.492683000  | H | -1.597770000 | 2.231493000  | 1.840607000  |
| H                                  | 5.589094000  | 0.209173000  | 0.607627000  | H | -0.572296000 | 2.514698000  | 3.242162000  |
| C                                  | 3.945345000  | 0.191147000  | -0.787713000 | H | -2.300112000 | 2.903795000  | 3.325273000  |
| H                                  | 4.554097000  | 0.287361000  | -1.678986000 | C | 1.177138000  | 0.287697000  | 2.531021000  |
| C                                  | 2.555955000  | 0.111857000  | -0.894639000 | O | 1.514267000  | 0.503489000  | 3.722591000  |
| C                                  | 1.757879000  | 0.181937000  | -2.184122000 | C | 2.194563000  | 0.455917000  | 1.418499000  |
| O                                  | 2.369808000  | 0.274449000  | -3.272889000 | C | 3.522194000  | 0.778269000  | 1.639106000  |
| C                                  | -0.434060000 | 0.210162000  | -3.106043000 | H | 3.875967000  | 0.947293000  | 2.648627000  |
| C                                  | -0.991724000 | 1.450484000  | -3.486587000 | C | 4.393307000  | 0.858879000  | 0.506864000  |
| C                                  | -0.634677000 | 2.712999000  | -2.738036000 | H | 5.442347000  | 1.101941000  | 0.649674000  |
| H                                  | -0.896149000 | 2.633993000  | -1.676186000 | C | 3.904289000  | 0.624323000  | -0.759216000 |
| H                                  | -1.160875000 | 3.575549000  | -3.157157000 | H | 4.546229000  | 0.674997000  | -1.632501000 |
| H                                  | 0.441426000  | 2.916866000  | -2.781286000 | C | 2.522761000  | 0.317613000  | -0.936331000 |
| C                                  | -1.885425000 | 1.489169000  | -4.566629000 | C | 1.900335000  | 0.061234000  | -2.192274000 |
| H                                  | -2.316565000 | 2.442817000  | -4.862569000 | O | 2.500668000  | -0.045988000 | -3.302322000 |
| C                                  | -2.225752000 | 0.325994000  | -5.261257000 | C | -0.334130000 | 0.065518000  | -3.143734000 |
| H                                  | -2.920474000 | 0.370434000  | -6.095722000 | C | -0.273755000 | 1.327378000  | -3.850962000 |
| C                                  | -1.669938000 | -0.895707000 | -4.873435000 | C | 0.648323000  | 2.446912000  | -3.428321000 |
| H                                  | -1.934177000 | -1.805141000 | -5.408284000 | H | 0.647932000  | 2.578361000  | -2.341547000 |
| C                                  | -0.773086000 | -0.973805000 | -3.798499000 | H | 0.324522000  | 3.387232000  | -3.882144000 |
| C                                  | -0.186967000 | -2.302405000 | -3.382871000 | H | 1.681108000  | 2.256381000  | -3.731680000 |
| H                                  | 0.904656000  | -2.308343000 | -3.480337000 | C | -1.186452000 | 1.558182000  | -4.875650000 |
| H                                  | -0.586474000 | -3.113144000 | -3.998986000 | H | -1.171971000 | 2.517554000  | -5.385846000 |
| H                                  | -0.411700000 | -2.526170000 | -2.333491000 | C | -2.137021000 | 0.596706000  | -5.246489000 |
| F                                  | -2.055793000 | -0.376450000 | -0.223101000 | H | -2.827083000 | 0.803133000  | -6.059420000 |
| <sup>5</sup> (L)Ni <sup>II</sup> F |              |              |              | C | -2.206861000 | -0.621129000 | -4.559471000 |
| Ni                                 | -0.163356000 | -0.350141000 | 0.042308000  | H | -2.940595000 | -1.365204000 | -4.856730000 |
| N                                  | -0.027167000 | -0.106078000 | 2.086864000  | C | -1.344666000 | -0.904032000 | -3.504217000 |
| N                                  | 1.708476000  | 0.241102000  | 0.178754000  | C | -1.408721000 | -2.238749000 | -2.811752000 |
| N                                  | 0.496126000  | -0.254122000 | -2.115092000 | H | -0.447924000 | -2.761873000 | -2.863000000 |
| C                                  | -1.080586000 | -0.302633000 | 3.016221000  | H | -2.170965000 | -2.870946000 | -3.275614000 |
| C                                  | -1.370339000 | -1.608818000 | 3.471164000  | H | -1.657748000 | -2.101727000 | -1.754255000 |
| C                                  | -0.532056000 | -2.780195000 | 3.015912000  | F | -2.034926000 | -0.617453000 | -0.173349000 |

|                               |               |              |              |                                |               |              |              |
|-------------------------------|---------------|--------------|--------------|--------------------------------|---------------|--------------|--------------|
| <sup>1</sup> IM <sub>PF</sub> |               |              |              | H                              | -11.840331000 | 2.129831000  | -3.732478000 |
| F                             | -6.773489000  | 6.131015000  | 1.549488000  | H                              | -10.338663000 | 1.198343000  | -3.563411000 |
| P                             | -7.924626000  | 5.104423000  | 1.105385000  | C                              | -12.357902000 | 2.156393000  | -1.165024000 |
| C                             | -7.862923000  | 5.083117000  | -0.678586000 | H                              | -12.761597000 | 2.982970000  | -1.745078000 |
| C                             | -7.482427000  | 3.551404000  | 1.868059000  | C                              | -12.578081000 | 2.100083000  | 0.213226000  |
| C                             | -9.435407000  | 5.808897000  | 1.753017000  | H                              | -13.150524000 | 2.880662000  | 0.707003000  |
| C                             | -7.882374000  | 3.867209000  | -1.385084000 | C                              | -12.061525000 | 1.033890000  | 0.953218000  |
| C                             | -8.420227000  | 2.849348000  | 2.645240000  | H                              | -12.234141000 | 0.984619000  | 2.025775000  |
| C                             | -9.465191000  | 6.271216000  | 3.083561000  | C                              | -11.322710000 | 0.016047000  | 0.333241000  |
| C                             | -7.819040000  | 6.315698000  | -1.362590000 | C                              | -10.780927000 | -1.140552000 | 1.139349000  |
| C                             | -6.178439000  | 3.048398000  | 1.690008000  | H                              | -9.694436000  | -1.229904000 | 1.030166000  |
| C                             | -10.581717000 | 5.886889000  | 0.943109000  | H                              | -11.210364000 | -2.093525000 | 0.809356000  |
| C                             | -7.856419000  | 3.898000000  | -2.781505000 | H                              | -11.011626000 | -1.015614000 | 2.201172000  |
| C                             | -8.048821000  | 1.644839000  | 3.243957000  | C                              | -10.988255000 | -2.002416000 | -2.195609000 |
| C                             | -10.643907000 | 6.812095000  | 3.593176000  | O                              | -12.213838000 | -2.251532000 | -2.166776000 |
| C                             | -7.786378000  | 6.324929000  | -2.754639000 | C                              | -10.023302000 | -2.964434000 | -2.840442000 |
| C                             | -5.820495000  | 1.848242000  | 2.299671000  | C                              | -10.321714000 | -4.178788000 | -3.454197000 |
| C                             | -11.757045000 | 6.425092000  | 1.469597000  | H                              | -11.349938000 | -4.518281000 | -3.501069000 |
| C                             | -7.807017000  | 5.116550000  | -3.462930000 | C                              | -9.268312000  | -4.925909000 | -3.995624000 |
| C                             | -6.753556000  | 1.148141000  | 3.074114000  | H                              | -9.472414000  | -5.875765000 | -4.479585000 |
| C                             | -11.787538000 | 6.886883000  | 2.788537000  | C                              | -7.952796000  | -4.452684000 | -3.915798000 |
| H                             | -7.921689000  | 2.903097000  | -0.884672000 | H                              | -7.116623000  | -5.007382000 | -4.325457000 |
| H                             | -9.424972000  | 3.233444000  | 2.782606000  | C                              | -7.727506000  | -3.229945000 | -3.287846000 |
| H                             | -8.581473000  | 6.217679000  | 3.711432000  | C                              | -6.406174000  | -2.532105000 | -3.089706000 |
| H                             | -7.803641000  | 7.254337000  | -0.817498000 | O                              | -5.345468000  | -3.043024000 | -3.512510000 |
| H                             | -5.450761000  | 3.586019000  | 1.090533000  | C                              | -5.420400000  | -0.570219000 | -2.166074000 |
| H                             | -10.561558000 | 5.533050000  | -0.081927000 | C                              | -4.717464000  | -0.746840000 | -0.955041000 |
| H                             | -7.872356000  | 2.962804000  | -3.330527000 | C                              | -5.147144000  | -1.799996000 | 0.038580000  |
| H                             | -8.770650000  | 1.099191000  | 3.842633000  | H                              | -6.183771000  | -1.648723000 | 0.359537000  |
| H                             | -10.669746000 | 7.175063000  | 4.615445000  | H                              | -4.506400000  | -1.781945000 | 0.924792000  |
| H                             | -7.745642000  | 7.270734000  | -3.285082000 | H                              | -5.095313000  | -2.804515000 | -0.396852000 |
| H                             | -4.816637000  | 1.458743000  | 2.168206000  | C                              | -3.603761000  | 0.065327000  | -0.697365000 |
| H                             | -12.644022000 | 6.485534000  | 0.847573000  | H                              | -3.055368000  | -0.067679000 | 0.232271000  |
| H                             | -7.784019000  | 5.128044000  | -4.548421000 | C                              | -3.191893000  | 1.033989000  | -1.615702000 |
| H                             | -6.468735000  | 0.212175000  | 3.544648000  | H                              | -2.327880000  | 1.657305000  | -1.401293000 |
| H                             | -12.703426000 | 7.307804000  | 3.191858000  | C                              | -3.894279000  | 1.195288000  | -2.812308000 |
| Ni                            | -8.408299000  | -0.925391000 | -1.955150000 | H                              | -3.573939000  | 1.944917000  | -3.532098000 |
| N                             | -10.341511000 | -0.927729000 | -1.703494000 | C                              | -5.010459000  | 0.399101000  | -3.106482000 |
| N                             | -8.754949000  | -2.537151000 | -2.778567000 | C                              | -5.747620000  | 0.562041000  | -4.414506000 |
| N                             | -6.570242000  | -1.366539000 | -2.434256000 | H                              | -5.659286000  | -0.337452000 | -5.035211000 |
| C                             | -11.106238000 | 0.086656000  | -1.059625000 | H                              | -5.347865000  | 1.405617000  | -4.984395000 |
| C                             | -11.623396000 | 1.157455000  | -1.819890000 | H                              | -6.818503000  | 0.727189000  | -4.253826000 |
| C                             | -11.405127000 | 1.218194000  | -3.313145000 | F                              | -8.064097000  | 0.684281000  | -1.134594000 |
| H                             | -11.863480000 | 0.360201000  | -3.818370000 | <sup>1</sup> TS <sub>2PF</sub> |               |              |              |

|    |               |              |              |                                |               |              |              |
|----|---------------|--------------|--------------|--------------------------------|---------------|--------------|--------------|
| F  | -7.036725000  | 4.696053000  | 1.515767000  | H                              | -10.220426000 | 1.487960000  | -3.399120000 |
| P  | -7.743111000  | 3.496507000  | 0.644734000  | C                              | -12.966307000 | 2.494565000  | -1.947533000 |
| C  | -7.276460000  | 4.167758000  | -0.984850000 | H                              | -13.249706000 | 3.099031000  | -2.805913000 |
| C  | -6.955104000  | 2.140929000  | 1.573414000  | C                              | -13.622502000 | 2.666503000  | -0.727537000 |
| C  | -9.449553000  | 3.833011000  | 1.133087000  | H                              | -14.409629000 | 3.409316000  | -0.630709000 |
| C  | -8.079922000  | 3.994066000  | -2.124164000 | C                              | -13.259291000 | 1.882263000  | 0.368230000  |
| C  | -7.645482000  | 0.955833000  | 1.873549000  | H                              | -13.765770000 | 2.015718000  | 1.320709000  |
| C  | -9.887202000  | 3.410976000  | 2.400803000  | C                              | -12.245766000 | 0.919637000  | 0.265639000  |
| C  | -6.157558000  | 5.020030000  | -1.043398000 | C                              | -11.896087000 | 0.055185000  | 1.452781000  |
| C  | -5.694756000  | 2.380972000  | 2.150459000  | H                              | -10.815178000 | 0.013289000  | 1.618772000  |
| C  | -10.223025000 | 4.741270000  | 0.391293000  | H                              | -12.234126000 | -0.975912000 | 1.297622000  |
| C  | -7.779931000  | 4.688045000  | -3.296607000 | H                              | -12.369336000 | 0.434617000  | 2.362666000  |
| C  | -7.089557000  | 0.033736000  | 2.761916000  | C                              | -11.100970000 | -1.534095000 | -1.288016000 |
| C  | -11.093544000 | 3.889977000  | 2.912752000  | O                              | -12.286994000 | -1.920401000 | -1.223555000 |
| C  | -5.853887000  | 5.688836000  | -2.230378000 | C                              | -10.004316000 | -2.505080000 | -1.610790000 |
| C  | -5.138888000  | 1.441618000  | 3.020766000  | C                              | -10.133323000 | -3.879896000 | -1.789892000 |
| C  | -11.427764000 | 5.213417000  | 0.913900000  | H                              | -11.103341000 | -4.345128000 | -1.659646000 |
| C  | -6.669411000  | 5.534600000  | -3.353918000 | C                              | -8.995545000  | -4.615142000 | -2.139870000 |
| C  | -5.838869000  | 0.274508000  | 3.338017000  | H                              | -9.065854000  | -5.688556000 | -2.283768000 |
| C  | -11.862179000 | 4.793114000  | 2.173586000  | C                              | -7.769307000  | -3.964666000 | -2.313138000 |
| H  | -8.926292000  | 3.322579000  | -2.088887000 | H                              | -6.868859000  | -4.496766000 | -2.596576000 |
| H  | -8.609361000  | 0.761969000  | 1.424196000  | C                              | -7.716260000  | -2.586947000 | -2.116034000 |
| H  | -9.290036000  | 2.731662000  | 2.997833000  | C                              | -6.519711000  | -1.700854000 | -2.292066000 |
| H  | -5.531981000  | 5.179572000  | -0.174118000 | O                              | -5.448775000  | -2.173081000 | -2.729603000 |
| H  | -5.151928000  | 3.295370000  | 1.943349000  | C                              | -5.744298000  | 0.515833000  | -2.212242000 |
| H  | -9.888350000  | 5.096068000  | -0.576139000 | C                              | -4.638133000  | 0.593029000  | -1.337886000 |
| H  | -8.415486000  | 4.559590000  | -4.167189000 | C                              | -4.524085000  | -0.324208000 | -0.146403000 |
| H  | -7.637934000  | -0.872205000 | 3.000793000  | H                              | -5.449107000  | -0.353542000 | 0.433827000  |
| H  | -11.425960000 | 3.560450000  | 3.892133000  | H                              | -3.711779000  | -0.007409000 | 0.512753000  |
| H  | -4.984385000  | 6.337609000  | -2.267835000 | H                              | -4.317303000  | -1.350111000 | -0.473317000 |
| H  | -4.163328000  | 1.631608000  | 3.457113000  | C                              | -3.606394000  | 1.495909000  | -1.632538000 |
| H  | -12.021911000 | 5.913448000  | 0.335275000  | H                              | -2.753937000  | 1.560629000  | -0.960298000 |
| H  | -6.439055000  | 6.069068000  | -4.270736000 | C                              | -3.651089000  | 2.292017000  | -2.778289000 |
| H  | -5.410032000  | -0.446097000 | 4.027853000  | H                              | -2.842082000  | 2.984557000  | -2.994896000 |
| H  | -12.797364000 | 5.168219000  | 2.578071000  | C                              | -4.736850000  | 2.186247000  | -3.649279000 |
| Ni | -8.672987000  | -0.102227000 | -1.385887000 | H                              | -4.768602000  | 2.791591000  | -4.551514000 |
| N  | -10.619400000 | -0.280110000 | -1.141029000 | C                              | -5.792043000  | 1.302621000  | -3.384483000 |
| N  | -8.816972000  | -1.907029000 | -1.773266000 | C                              | -6.925939000  | 1.157202000  | -4.371103000 |
| N  | -6.796377000  | -0.419875000 | -1.963557000 | H                              | -6.999979000  | 0.128598000  | -4.742520000 |
| C  | -11.596685000 | 0.747743000  | -0.976248000 | H                              | -6.778523000  | 1.818940000  | -5.229187000 |
| C  | -11.953693000 | 1.535885000  | -2.093096000 | H                              | -7.892914000  | 1.398739000  | -3.918739000 |
| C  | -11.301918000 | 1.320621000  | -3.438631000 | F                              | -8.549912000  | 1.680136000  | -0.692357000 |
| H  | -11.445865000 | 0.293350000  | -3.792547000 | <sup>1</sup> IM2 <sub>PF</sub> |               |              |              |
| H  | -11.723645000 | 1.999603000  | -4.185131000 | F                              | -6.991951000  | 4.369671000  | 1.450875000  |



|    |               |              |              |                                |               |              |              |
|----|---------------|--------------|--------------|--------------------------------|---------------|--------------|--------------|
| P  | -7.767032000  | 3.163875000  | 0.556654000  | C                              | -12.937071000 | 2.657981000  | -1.921676000 |
| C  | -7.315917000  | 3.983594000  | -1.022029000 | H                              | -13.216284000 | 3.286526000  | -2.763842000 |
| C  | -6.901691000  | 1.853427000  | 1.507450000  | C                              | -13.574831000 | 2.819385000  | -0.690597000 |
| C  | -9.394595000  | 3.640786000  | 1.229696000  | H                              | -14.341170000 | 3.579974000  | -0.568514000 |
| C  | -8.173764000  | 3.925782000  | -2.133174000 | C                              | -13.223935000 | 1.998848000  | 0.382333000  |
| C  | -7.544878000  | 0.642077000  | 1.810938000  | H                              | -13.719669000 | 2.121352000  | 1.341723000  |
| C  | -9.789034000  | 3.165739000  | 2.489616000  | C                              | -12.235269000 | 1.014941000  | 0.248274000  |
| C  | -6.180575000  | 4.811512000  | -1.071688000 | C                              | -11.900210000 | 0.111852000  | 1.410232000  |
| C  | -5.645778000  | 2.125894000  | 2.077590000  | H                              | -10.820257000 | 0.043695000  | 1.571911000  |
| C  | -10.136503000 | 4.654167000  | 0.604897000  | H                              | -12.260923000 | -0.907062000 | 1.228503000  |
| C  | -7.913539000  | 4.705613000  | -3.261463000 | H                              | -12.362185000 | 0.477262000  | 2.331329000  |
| C  | -6.951933000  | -0.269113000 | 2.688077000  | C                              | -11.147027000 | -1.425827000 | -1.370686000 |
| C  | -10.922034000 | 3.695754000  | 3.111399000  | O                              | -12.337516000 | -1.791349000 | -1.304712000 |
| C  | -5.910953000  | 5.563730000  | -2.216274000 | C                              | -10.069437000 | -2.405204000 | -1.727710000 |
| C  | -5.047253000  | 1.198460000  | 2.932544000  | C                              | -10.218823000 | -3.773092000 | -1.938282000 |
| C  | -11.267847000 | 5.178853000  | 1.234026000  | H                              | -11.193918000 | -4.227683000 | -1.808340000 |
| C  | -6.782297000  | 5.524127000  | -3.307659000 | C                              | -9.094889000  | -4.514767000 | -2.318137000 |
| C  | -5.702765000  | 0.005761000  | 3.250448000  | H                              | -9.181408000  | -5.583364000 | -2.486327000 |
| C  | -11.660533000 | 4.705079000  | 2.488283000  | C                              | -7.861921000  | -3.877055000 | -2.490567000 |
| H  | -9.050183000  | 3.292243000  | -2.111889000 | H                              | -6.971940000  | -4.413811000 | -2.797294000 |
| H  | -8.512565000  | 0.415264000  | 1.384505000  | C                              | -7.787318000  | -2.505512000 | -2.261828000 |
| H  | -9.214185000  | 2.400694000  | 2.999235000  | C                              | -6.583827000  | -1.629235000 | -2.435040000 |
| H  | -5.512957000  | 4.882716000  | -0.222620000 | O                              | -5.527923000  | -2.099576000 | -2.904587000 |
| H  | -5.137521000  | 3.058933000  | 1.870113000  | C                              | -5.784594000  | 0.579528000  | -2.320595000 |
| H  | -9.833845000  | 5.049849000  | -0.357955000 | C                              | -4.649209000  | 0.615208000  | -1.481254000 |
| H  | -8.596661000  | 4.666876000  | -4.104443000 | C                              | -4.498066000  | -0.345897000 | -0.329334000 |
| H  | -7.470998000  | -1.192004000 | 2.928166000  | H                              | -5.413028000  | -0.422569000 | 0.261448000  |
| H  | -11.219547000 | 3.322036000  | 4.086536000  | H                              | -3.683666000  | -0.037198000 | 0.330751000  |
| H  | -5.023740000  | 6.188863000  | -2.246121000 | H                              | -4.270846000  | -1.351363000 | -0.703078000 |
| H  | -4.072246000  | 1.417011000  | 3.357162000  | C                              | -3.616166000  | 1.514008000  | -1.784154000 |
| H  | -11.836331000 | 5.962116000  | 0.741962000  | H                              | -2.741676000  | 1.548806000  | -1.138609000 |
| H  | -6.579975000  | 6.125403000  | -4.189155000 | C                              | -3.686253000  | 2.341330000  | -2.905814000 |
| H  | -5.242337000  | -0.705404000 | 3.929780000  | H                              | -2.875761000  | 3.030214000  | -3.128308000 |
| H  | -12.536940000 | 5.119968000  | 2.977184000  | C                              | -4.797480000  | 2.269959000  | -3.747502000 |
| Ni | -8.699732000  | -0.035546000 | -1.456710000 | H                              | -4.846770000  | 2.896498000  | -4.634189000 |
| N  | -10.642167000 | -0.183196000 | -1.197260000 | C                              | -5.855194000  | 1.393009000  | -3.473684000 |
| N  | -8.875375000  | -1.821503000 | -1.890176000 | C                              | -7.011207000  | 1.275230000  | -4.438152000 |
| N  | -6.840390000  | -0.352765000 | -2.068666000 | H                              | -7.099056000  | 0.254792000  | -4.828651000 |
| C  | -11.598926000 | 0.859849000  | -1.002680000 | H                              | -6.877121000  | 1.953395000  | -5.285399000 |
| C  | -11.951243000 | 1.677074000  | -2.100216000 | H                              | -7.967193000  | 1.515029000  | -3.963144000 |
| C  | -11.333863000 | 1.466466000  | -3.463189000 | F                              | -8.570025000  | 1.761096000  | -0.506277000 |
| H  | -11.499463000 | 0.444222000  | -3.821772000 | <sup>3</sup> IM' <sub>PF</sub> |               |              |              |
| H  | -11.766836000 | 2.156709000  | -4.192538000 | F                              | -6.752944000  | 6.573531000  | 2.053856000  |
| H  | -10.250022000 | 1.621785000  | -3.455841000 | P                              | -7.384746000  | 5.243798000  | 1.428612000  |

|    |               |              |              |                                |               |              |              |
|----|---------------|--------------|--------------|--------------------------------|---------------|--------------|--------------|
| C  | -7.059568000  | 5.408787000  | -0.329709000 | H                              | -13.421672000 | 3.247734000  | -1.439565000 |
| C  | -6.518630000  | 3.923833000  | 2.282500000  | C                              | -13.281983000 | 2.344100000  | 0.512890000  |
| C  | -9.127055000  | 5.284032000  | 1.814810000  | H                              | -13.940732000 | 3.068059000  | 0.984464000  |
| C  | -7.445103000  | 4.385592000  | -1.216257000 | C                              | -12.718241000 | 1.311758000  | 1.266363000  |
| C  | -6.778434000  | 2.582183000  | 1.946981000  | H                              | -12.939743000 | 1.232920000  | 2.328263000  |
| C  | -9.584500000  | 4.738845000  | 3.030209000  | C                              | -11.868019000 | 0.366243000  | 0.675348000  |
| C  | -6.435709000  | 6.577131000  | -0.803475000 | C                              | -11.268599000 | -0.748972000 | 1.499202000  |
| C  | -5.601598000  | 4.250327000  | 3.297692000  | H                              | -10.173989000 | -0.743311000 | 1.443290000  |
| C  | -10.018558000 | 5.943669000  | 0.946387000  | H                              | -11.596637000 | -1.732555000 | 1.143771000  |
| C  | -7.212140000  | 4.555933000  | -2.581858000 | H                              | -11.558643000 | -0.654989000 | 2.549696000  |
| C  | -6.116321000  | 1.573539000  | 2.648854000  | C                              | -11.264255000 | -1.591185000 | -1.816634000 |
| C  | -10.929413000 | 4.863935000  | 3.373531000  | O                              | -12.467795000 | -1.933195000 | -1.793757000 |
| C  | -6.208916000  | 6.725166000  | -2.172557000 | C                              | -10.252139000 | -2.507611000 | -2.474323000 |
| C  | -4.948988000  | 3.226194000  | 3.985483000  | C                              | -10.537005000 | -3.721596000 | -3.101069000 |
| C  | -11.360601000 | 6.061320000  | 1.303260000  | H                              | -11.555767000 | -4.089250000 | -3.133767000 |
| C  | -6.599834000  | 5.718881000  | -3.060347000 | C                              | -9.476170000  | -4.429493000 | -3.679030000 |
| C  | -5.208275000  | 1.890665000  | 3.664488000  | H                              | -9.665883000  | -5.377337000 | -4.173269000 |
| C  | -11.813619000 | 5.524490000  | 2.513475000  | C                              | -8.173347000  | -3.918859000 | -3.630173000 |
| H  | -7.905562000  | 3.459601000  | -0.874347000 | H                              | -7.335987000  | -4.442159000 | -4.076486000 |
| H  | -7.464242000  | 2.303220000  | 1.148116000  | C                              | -7.970742000  | -2.697532000 | -2.986268000 |
| H  | -8.901455000  | 4.223504000  | 3.697017000  | C                              | -6.645040000  | -1.974926000 | -2.853853000 |
| H  | -6.136625000  | 7.362818000  | -0.119307000 | O                              | -5.615769000  | -2.501931000 | -3.331968000 |
| H  | -5.401233000  | 5.284607000  | 3.552752000  | C                              | -5.561466000  | -0.031543000 | -2.045370000 |
| H  | -9.670816000  | 6.356956000  | 0.005535000  | C                              | -4.755654000  | -0.234209000 | -0.903604000 |
| H  | -7.507934000  | 3.772939000  | -3.271824000 | C                              | -5.110616000  | -1.300215000 | 0.105615000  |
| H  | -6.310624000  | 0.536664000  | 2.396160000  | H                              | -6.135700000  | -1.178949000 | 0.473602000  |
| H  | -11.287103000 | 4.442432000  | 4.307221000  | H                              | -4.429669000  | -1.269855000 | 0.960970000  |
| H  | -5.730887000  | 7.627063000  | -2.541146000 | H                              | -5.053782000  | -2.301974000 | -0.336265000 |
| H  | -4.242140000  | 3.474980000  | 4.770494000  | C                              | -3.613266000  | 0.560559000  | -0.732017000 |
| H  | -12.051791000 | 6.565718000  | 0.636136000  | H                              | -2.990370000  | 0.408562000  | 0.146466000  |
| H  | -6.424742000  | 5.838859000  | -4.125167000 | C                              | -3.266760000  | 1.535787000  | -1.670366000 |
| H  | -4.700984000  | 1.096407000  | 4.203700000  | H                              | -2.379035000  | 2.145142000  | -1.523453000 |
| H  | -12.860935000 | 5.615631000  | 2.784461000  | C                              | -4.068236000  | 1.721746000  | -2.799275000 |
| Ni | -8.652905000  | -0.312849000 | -1.523479000 | H                              | -3.800579000  | 2.476156000  | -3.535485000 |
| N  | -10.712183000 | -0.464752000 | -1.322905000 | C                              | -5.218708000  | 0.946711000  | -3.004066000 |
| N  | -8.999068000  | -2.052306000 | -2.433585000 | C                              | -6.068922000  | 1.140289000  | -4.237258000 |
| N  | -6.752127000  | -0.792757000 | -2.214638000 | H                              | -6.072152000  | 0.241718000  | -4.865321000 |
| C  | -11.589556000 | 0.470330000  | -0.705114000 | H                              | -5.696833000  | 1.972989000  | -4.840957000 |
| C  | -12.144173000 | 1.515825000  | -1.475346000 | H                              | -7.114386000  | 1.341039000  | -3.976570000 |
| C  | -11.837684000 | 1.628317000  | -2.950335000 | F                              | -8.322043000  | 1.346269000  | -0.583932000 |
| H  | -12.188293000 | 0.748435000  | -3.502210000 | <sup>3</sup> TS <sub>2PF</sub> |               |              |              |
| H  | -12.318431000 | 2.511467000  | -3.380940000 | F                              | -7.030610000  | 4.809674000  | 2.054728000  |
| H  | -10.758776000 | 1.701921000  | -3.129742000 | P                              | -7.628086000  | 3.735739000  | 0.989672000  |
| C  | -12.989230000 | 2.443119000  | -0.849214000 | C                              | -6.929271000  | 4.450936000  | -0.523983000 |

|    |               |              |              |                                |               |              |              |
|----|---------------|--------------|--------------|--------------------------------|---------------|--------------|--------------|
| C  | -6.950744000  | 2.246254000  | 1.761913000  | C                              | -13.960492000 | 2.450774000  | -0.709664000 |
| C  | -9.387953000  | 4.002629000  | 1.223534000  | H                              | -14.778200000 | 3.159306000  | -0.608613000 |
| C  | -7.456606000  | 4.187925000  | -1.799979000 | C                              | -13.540333000 | 1.699450000  | 0.389389000  |
| C  | -7.717882000  | 1.086554000  | 1.951614000  | H                              | -14.031604000 | 1.826994000  | 1.351133000  |
| C  | -9.958072000  | 3.624170000  | 2.452801000  | C                              | -12.489184000 | 0.778349000  | 0.280350000  |
| C  | -5.878279000  | 5.378542000  | -0.374071000 | C                              | -12.063381000 | -0.032444000 | 1.480745000  |
| C  | -5.648735000  | 2.327907000  | 2.289221000  | H                              | -10.977014000 | -0.006012000 | 1.617966000  |
| C  | -10.126596000 | 4.767269000  | 0.305881000  | H                              | -12.342386000 | -1.085564000 | 1.361500000  |
| C  | -6.949910000  | 4.868494000  | -2.907620000 | H                              | -12.534598000 | 0.345101000  | 2.392791000  |
| C  | -7.185854000  | 0.020315000  | 2.678672000  | C                              | -11.159561000 | -1.631468000 | -1.173790000 |
| C  | -11.264782000 | 4.008011000  | 2.753239000  | O                              | -12.305546000 | -2.127054000 | -1.049299000 |
| C  | -5.369713000  | 6.035724000  | -1.495043000 | C                              | -10.001344000 | -2.563967000 | -1.458405000 |
| C  | -5.124316000  | 1.251329000  | 3.004914000  | C                              | -10.094940000 | -3.953748000 | -1.545300000 |
| C  | -11.432904000 | 5.143608000  | 0.618188000  | H                              | -11.042847000 | -4.442368000 | -1.354352000 |
| C  | -5.910916000  | 5.791228000  | -2.760052000 | C                              | -8.945705000  | -4.673505000 | -1.890599000 |
| C  | -5.893170000  | 0.100860000  | 3.205699000  | H                              | -8.986598000  | -5.756168000 | -1.961454000 |
| C  | -12.000648000 | 4.767829000  | 1.839015000  | C                              | -7.749148000  | -4.001789000 | -2.164412000 |
| H  | -8.236882000  | 3.446330000  | -1.911414000 | H                              | -6.849957000  | -4.528512000 | -2.460608000 |
| H  | -8.711893000  | 1.018729000  | 1.530216000  | C                              | -7.734590000  | -2.610280000 | -2.056818000 |
| H  | -9.389773000  | 3.050668000  | 3.177277000  | C                              | -6.552440000  | -1.724724000 | -2.386993000 |
| H  | -5.465400000  | 5.602037000  | 0.601606000  | O                              | -5.510279000  | -2.265182000 | -2.830954000 |
| H  | -5.048732000  | 3.221875000  | 2.158108000  | C                              | -5.752037000  | 0.478837000  | -2.570471000 |
| H  | -9.690136000  | 5.077996000  | -0.635910000 | C                              | -4.613496000  | 0.646097000  | -1.749989000 |
| H  | -7.366529000  | 4.668024000  | -3.889472000 | C                              | -4.461307000  | -0.141588000 | -0.472171000 |
| H  | -7.784123000  | -0.872425000 | 2.831388000  | H                              | -5.350898000  | -0.059893000 | 0.159347000  |
| H  | -11.703762000 | 3.715779000  | 3.701790000  | H                              | -3.599204000  | 0.209544000  | 0.101718000  |
| H  | -4.557622000  | 6.745466000  | -1.372796000 | H                              | -4.318364000  | -1.207042000 | -0.686256000 |
| H  | -4.118641000  | 1.316229000  | 3.407783000  | C                              | -3.608098000  | 1.534291000  | -2.158289000 |
| H  | -12.003978000 | 5.732010000  | -0.092629000 | H                              | -2.731164000  | 1.664216000  | -1.527917000 |
| H  | -5.520306000  | 6.313927000  | -3.628030000 | C                              | -3.711581000  | 2.239259000  | -3.359582000 |
| H  | -5.484594000  | -0.732245000 | 3.769607000  | H                              | -2.920893000  | 2.919274000  | -3.665232000 |
| H  | -13.016662000 | 5.066353000  | 2.077777000  | C                              | -4.839625000  | 2.064655000  | -4.163620000 |
| Ni | -8.730344000  | 0.027007000  | -1.418477000 | H                              | -4.926615000  | 2.609568000  | -5.100696000 |
| N  | -10.803827000 | -0.335973000 | -1.135615000 | C                              | -5.870825000  | 1.194682000  | -3.783040000 |
| N  | -8.838294000  | -1.951898000 | -1.695297000 | C                              | -7.079961000  | 1.011372000  | -4.669713000 |
| N  | -6.794333000  | -0.416805000 | -2.195778000 | H                              | -7.215621000  | -0.037499000 | -4.956241000 |
| C  | -11.854991000 | 0.609226000  | -0.972267000 | H                              | -6.984933000  | 1.605585000  | -5.583239000 |
| C  | -12.262881000 | 1.376624000  | -2.088271000 | H                              | -8.001211000  | 1.319086000  | -4.160594000 |
| C  | -11.602160000 | 1.200261000  | -3.436168000 | F                              | -8.574460000  | 1.835663000  | -0.681233000 |
| H  | -11.589066000 | 0.149718000  | -3.745336000 | <sup>3</sup> IM2 <sub>PF</sub> |               |              |              |
| H  | -12.129703000 | 1.776278000  | -4.202153000 | F                              | -7.275692000  | 4.419349000  | 1.397529000  |
| H  | -10.559117000 | 1.539704000  | -3.425805000 | P                              | -7.982998000  | 3.168086000  | 0.480483000  |
| C  | -13.316468000 | 2.289959000  | -1.937821000 | C                              | -7.395276000  | 3.934151000  | -1.082285000 |
| H  | -13.638513000 | 2.871313000  | -2.798821000 | C                              | -7.108866000  | 1.916616000  | 1.499779000  |

|    |               |              |              |                                    |               |              |              |
|----|---------------|--------------|--------------|------------------------------------|---------------|--------------|--------------|
| C  | -9.643447000  | 3.665555000  | 1.056977000  | H                                  | -14.701353000 | 3.113577000  | -0.844356000 |
| C  | -8.110485000  | 3.768750000  | -2.281401000 | C                                  | -13.506441000 | 1.621098000  | 0.156447000  |
| C  | -7.745561000  | 0.718409000  | 1.862795000  | H                                  | -14.012746000 | 1.744957000  | 1.110636000  |
| C  | -10.033199000 | 3.360516000  | 2.369847000  | C                                  | -12.468713000 | 0.684440000  | 0.054020000  |
| C  | -6.281754000  | 4.793993000  | -1.063636000 | C                                  | -12.085919000 | -0.157553000 | 1.247290000  |
| C  | -5.835297000  | 2.202955000  | 2.020325000  | H                                  | -11.003477000 | -0.155633000 | 1.411414000  |
| C  | -10.457204000 | 4.483028000  | 0.260722000  | H                                  | -12.382952000 | -1.202290000 | 1.100574000  |
| C  | -7.737423000  | 4.474894000  | -3.426954000 | H                                  | -12.571572000 | 0.210693000  | 2.155341000  |
| C  | -7.124062000  | -0.170112000 | 2.743971000  | C                                  | -11.180909000 | -1.728600000 | -1.450109000 |
| C  | -11.234647000 | 3.863405000  | 2.875408000  | O                                  | -12.345855000 | -2.180193000 | -1.377482000 |
| C  | -5.895911000  | 5.471922000  | -2.221515000 | C                                  | -10.049869000 | -2.690868000 | -1.740285000 |
| C  | -5.207966000  | 1.298080000  | 2.878930000  | C                                  | -10.171413000 | -4.072144000 | -1.894526000 |
| C  | -11.652898000 | 4.989907000  | 0.776850000  | H                                  | -11.134845000 | -4.548648000 | -1.758599000 |
| C  | -6.629839000  | 5.325705000  | -3.401829000 | C                                  | -9.025071000  | -4.800726000 | -2.234315000 |
| C  | -5.853551000  | 0.115305000  | 3.250895000  | H                                  | -9.088039000  | -5.877389000 | -2.358250000 |
| C  | -12.043258000 | 4.683217000  | 2.082873000  | C                                  | -7.801990000  | -4.148777000 | -2.432503000 |
| H  | -8.963630000  | 3.104715000  | -2.320835000 | H                                  | -6.905349000  | -4.685483000 | -2.718326000 |
| H  | -8.732852000  | 0.485398000  | 1.484473000  | C                                  | -7.760607000  | -2.765094000 | -2.259164000 |
| H  | -9.404361000  | 2.745461000  | 3.005054000  | C                                  | -6.558037000  | -1.877302000 | -2.486170000 |
| H  | -5.722707000  | 4.946975000  | -0.149791000 | O                                  | -5.501094000  | -2.397438000 | -2.908743000 |
| H  | -5.334699000  | 3.129584000  | 1.767951000  | C                                  | -5.708670000  | 0.315320000  | -2.495371000 |
| H  | -10.163540000 | 4.740933000  | -0.750957000 | C                                  | -4.623884000  | 0.410683000  | -1.595437000 |
| H  | -8.312693000  | 4.351590000  | -4.339379000 | C                                  | -4.564376000  | -0.454064000 | -0.360647000 |
| H  | -7.636833000  | -1.083096000 | 3.031057000  | H                                  | -5.488417000  | -0.394493000 | 0.220981000  |
| H  | -11.530694000 | 3.620073000  | 3.891476000  | H                                  | -3.733632000  | -0.154966000 | 0.283902000  |
| H  | -5.027326000  | 6.122871000  | -2.193729000 | H                                  | -4.423063000  | -1.506392000 | -0.633205000 |
| H  | -4.218332000  | 1.525091000  | 3.263480000  | C                                  | -3.574862000  | 1.292279000  | -1.892834000 |
| H  | -12.276104000 | 5.624706000  | 0.154466000  | H                                  | -2.739335000  | 1.370632000  | -1.200979000 |
| H  | -6.338268000  | 5.868434000  | -4.296186000 | C                                  | -3.582402000  | 2.053635000  | -3.063435000 |
| H  | -5.369702000  | -0.579275000 | 3.931161000  | H                                  | -2.760098000  | 2.729814000  | -3.281537000 |
| H  | -12.972533000 | 5.079927000  | 2.480801000  | C                                  | -4.650558000  | 1.935620000  | -3.954623000 |
| Ni | -8.730020000  | -0.154831000 | -1.575766000 | H                                  | -4.655946000  | 2.516469000  | -4.873683000 |
| N  | -10.780188000 | -0.444837000 | -1.345482000 | C                                  | -5.722284000  | 1.071878000  | -3.687887000 |
| N  | -8.864722000  | -2.104646000 | -1.911593000 | C                                  | -6.847901000  | 0.922678000  | -4.684088000 |
| N  | -6.794009000  | -0.573920000 | -2.229014000 | H                                  | -6.935474000  | -0.111772000 | -5.035639000 |
| C  | -11.815751000 | 0.523934000  | -1.188861000 | H                                  | -6.682443000  | 1.564625000  | -5.554014000 |
| C  | -12.196714000 | 1.302419000  | -2.305382000 | H                                  | -7.816873000  | 1.189521000  | -4.247718000 |
| C  | -11.530376000 | 1.115786000  | -3.648985000 | F                                  | -8.720702000  | 1.797972000  | -0.504061000 |
| H  | -11.560687000 | 0.069644000  | -3.972178000 | <sup>1</sup> IM' <sub>PF-cis</sub> |               |              |              |
| H  | -12.025141000 | 1.723564000  | -4.412023000 | Ni                                 | 0.553735000   | 0.358830000  | -0.189159000 |
| H  | -10.473640000 | 1.407515000  | -3.627085000 | N                                  | 0.620353000   | 0.735777000  | 1.721554000  |
| C  | -13.236816000 | 2.232142000  | -2.161311000 | N                                  | 2.377428000   | 0.581711000  | -0.053934000 |
| H  | -13.537899000 | 2.825737000  | -3.021389000 | N                                  | 0.986545000   | 0.046157000  | -2.063527000 |
| C  | -13.894728000 | 2.391930000  | -0.940697000 | C                                  | -0.493129000  | 0.789276000  | 2.608283000  |

|   |              |              |              |                                    |               |              |              |
|---|--------------|--------------|--------------|------------------------------------|---------------|--------------|--------------|
| C | -0.893057000 | -0.376176000 | 3.296509000  | H                                  | 0.212287000   | -2.610178000 | -1.534810000 |
| C | -0.139318000 | -1.672980000 | 3.118872000  | F                                  | -1.266805000  | 0.127600000  | -0.322177000 |
| H | 0.895870000  | -1.584836000 | 3.468440000  | P                                  | -5.475681000  | -1.135528000 | 0.276735000  |
| H | -0.617838000 | -2.480399000 | 3.680499000  | F                                  | -4.316374000  | -0.932103000 | 1.359301000  |
| H | -0.092006000 | -1.966550000 | 2.064369000  | C                                  | -5.016580000  | -2.610787000 | -0.623644000 |
| C | -1.996859000 | -0.305322000 | 4.158355000  | C                                  | -6.979519000  | -1.335306000 | 1.224122000  |
| H | -2.308936000 | -1.199115000 | 4.693549000  | C                                  | -5.469827000  | 0.348571000  | -0.717221000 |
| C | -2.694481000 | 0.891629000  | 4.336106000  | C                                  | -5.115383000  | -2.641996000 | -2.025430000 |
| H | -3.547871000 | 0.931648000  | 5.007819000  | C                                  | -7.813412000  | -2.447051000 | 1.012567000  |
| C | -2.290429000 | 2.036741000  | 3.645692000  | C                                  | -6.688396000  | 0.929729000  | -1.114128000 |
| H | -2.830723000 | 2.970671000  | 3.781833000  | C                                  | -4.583243000  | -3.745033000 | 0.090324000  |
| C | -1.190198000 | 2.004881000  | 2.776840000  | C                                  | -7.318941000  | -0.357570000 | 2.180686000  |
| C | -0.750320000 | 3.252112000  | 2.047478000  | C                                  | -4.237484000  | 0.904349000  | -1.115402000 |
| H | -0.732414000 | 3.095209000  | 0.963328000  | C                                  | -4.786111000  | -3.813499000 | -2.709001000 |
| H | 0.263664000  | 3.549128000  | 2.339581000  | C                                  | -8.986624000  | -2.576285000 | 1.757830000  |
| H | -1.423027000 | 4.086847000  | 2.264461000  | C                                  | -6.672671000  | 2.070283000  | -1.917189000 |
| C | 1.850233000  | 0.960145000  | 2.224442000  | C                                  | -4.249158000  | -4.904646000 | -0.606600000 |
| O | 2.171597000  | 1.219824000  | 3.405200000  | C                                  | -8.489296000  | -0.503568000 | 2.922271000  |
| C | 2.899806000  | 0.864683000  | 1.146780000  | C                                  | -4.244186000  | 2.051033000  | -1.910147000 |
| C | 4.275046000  | 1.035980000  | 1.286903000  | C                                  | -4.353976000  | -4.939635000 | -2.002436000 |
| H | 4.690613000  | 1.264591000  | 2.261484000  | C                                  | -9.321990000  | -1.609473000 | 2.709883000  |
| C | 5.080033000  | 0.904820000  | 0.148565000  | C                                  | -5.453367000  | 2.629822000  | -2.312131000 |
| H | 6.154768000  | 1.033423000  | 0.228966000  | H                                  | -5.442013000  | -1.767512000 | -2.577889000 |
| C | 4.504512000  | 0.608181000  | -1.093156000 | H                                  | -7.555197000  | -3.200510000 | 0.276603000  |
| H | 5.100965000  | 0.500305000  | -1.991682000 | H                                  | -7.635548000  | 0.501914000  | -0.803165000 |
| C | 3.122270000  | 0.449366000  | -1.159624000 | H                                  | -4.499937000  | -3.722657000 | 1.172209000  |
| C | 2.294051000  | 0.128980000  | -2.377670000 | H                                  | -6.678944000  | 0.503092000  | 2.349064000  |
| O | 2.835246000  | -0.023238000 | -3.495066000 | H                                  | -3.285749000  | 0.473592000  | -0.806623000 |
| C | 0.056542000  | -0.245924000 | -3.101704000 | H                                  | -4.861598000  | -3.841663000 | -3.791016000 |
| C | -0.534593000 | 0.812589000  | -3.824209000 | H                                  | -9.633501000  | -3.432130000 | 1.595046000  |
| C | -0.163430000 | 2.246788000  | -3.530056000 | H                                  | -7.609599000  | 2.521668000  | -2.226917000 |
| H | -0.337893000 | 2.496855000  | -2.477511000 | H                                  | -3.907935000  | -5.778712000 | -0.061576000 |
| H | -0.746364000 | 2.934214000  | -4.149714000 | H                                  | -8.751580000  | 0.244113000  | 3.663659000  |
| H | 0.898993000  | 2.433058000  | -3.725282000 | H                                  | -3.300811000  | 2.492214000  | -2.214850000 |
| C | -1.465562000 | 0.507553000  | -4.827448000 | H                                  | -4.094582000  | -5.846771000 | -2.539569000 |
| H | -1.923850000 | 1.318389000  | -5.388812000 | H                                  | -10.234081000 | -1.715950000 | 3.289079000  |
| C | -1.806637000 | -0.816602000 | -5.112845000 | H                                  | -5.444943000  | 3.520884000  | -2.932613000 |
| H | -2.529656000 | -1.038137000 | -5.893367000 | <sup>1</sup> TS2 <sub>PF-cis</sub> |               |              |              |
| C | -1.212924000 | -1.854612000 | -4.390886000 | Ni                                 | -0.202355000  | -0.101154000 | -0.223988000 |
| H | -1.473654000 | -2.886873000 | -4.612119000 | N                                  | -0.030167000  | -0.067702000 | 1.704390000  |
| C | -0.277807000 | -1.588409000 | -3.380399000 | N                                  | 1.366638000   | 0.834054000  | -0.166662000 |
| C | 0.368395000  | -2.718102000 | -2.613884000 | N                                  | 0.068112000   | 0.004404000  | -2.132790000 |
| H | 1.452496000  | -2.740972000 | -2.774773000 | C                                  | -0.928921000  | -0.662198000 | 2.637368000  |
| H | -0.039953000 | -3.683286000 | -2.926827000 | C                                  | -0.985031000  | -2.071853000 | 2.734777000  |

|   |              |              |              |                                    |              |              |              |
|---|--------------|--------------|--------------|------------------------------------|--------------|--------------|--------------|
| C | -0.090091000 | -2.953141000 | 1.894112000  | F                                  | -2.980729000 | 0.120995000  | -0.554568000 |
| H | 0.950155000  | -2.613605000 | 1.921579000  | P                                  | -4.665283000 | 0.000575000  | 0.067337000  |
| H | -0.125060000 | -3.986404000 | 2.250702000  | F                                  | -4.032148000 | 0.903462000  | 1.268992000  |
| H | -0.397274000 | -2.958611000 | 0.841551000  | C                                  | -4.478753000 | -1.824758000 | -0.041246000 |
| C | -1.874132000 | -2.648464000 | 3.652186000  | C                                  | -6.350058000 | 0.031361000  | 0.931683000  |
| H | -1.916599000 | -3.731351000 | 3.738238000  | C                                  | -5.191631000 | 0.959258000  | -1.399989000 |
| C | -2.691444000 | -1.853885000 | 4.458426000  | C                                  | -3.739777000 | -2.418561000 | -1.083449000 |
| H | -3.375133000 | -2.315790000 | 5.165499000  | C                                  | -7.471153000 | -0.441260000 | 0.224610000  |
| C | -2.624798000 | -0.463268000 | 4.353565000  | C                                  | -5.443577000 | 0.354154000  | -2.637674000 |
| H | -3.260728000 | 0.157765000  | 4.979694000  | C                                  | -5.081059000 | -2.651674000 | 0.923408000  |
| C | -1.751957000 | 0.154440000  | 3.447794000  | C                                  | -6.544544000 | 0.505359000  | 2.238661000  |
| C | -1.689042000 | 1.659531000  | 3.362073000  | C                                  | -5.392514000 | 2.340086000  | -1.244008000 |
| H | -1.724212000 | 2.002704000  | 2.323722000  | C                                  | -3.639261000 | -3.807889000 | -1.171288000 |
| H | -0.756848000 | 2.037274000  | 3.797351000  | C                                  | -8.742358000 | -0.442736000 | 0.802045000  |
| H | -2.525248000 | 2.111855000  | 3.902234000  | C                                  | -5.904024000 | 1.125858000  | -3.709535000 |
| C | 1.069547000  | 0.568988000  | 2.168059000  | C                                  | -4.945359000 | -4.040097000 | 0.850928000  |
| O | 1.443427000  | 0.704417000  | 3.348030000  | C                                  | -7.819064000 | 0.507290000  | 2.820612000  |
| C | 1.884197000  | 1.128942000  | 1.031784000  | C                                  | -5.833493000 | 3.107759000  | -2.324113000 |
| C | 3.065387000  | 1.861852000  | 1.111088000  | C                                  | -4.236222000 | -4.621883000 | -0.203093000 |
| H | 3.484494000  | 2.097533000  | 2.082328000  | C                                  | -8.921299000 | 0.033959000  | 2.106017000  |
| C | 3.675432000  | 2.270398000  | -0.081139000 | C                                  | -6.096705000 | 2.501341000  | -3.557387000 |
| H | 4.595120000  | 2.845319000  | -0.046848000 | H                                  | -3.241294000 | -1.801470000 | -1.819792000 |
| C | 3.110618000  | 1.933936000  | -1.317578000 | H                                  | -7.361256000 | -0.815997000 | -0.789553000 |
| H | 3.565837000  | 2.225487000  | -2.256938000 | H                                  | -5.291088000 | -0.710840000 | -2.776083000 |
| C | 1.929669000  | 1.196851000  | -1.325717000 | H                                  | -5.649720000 | -2.220451000 | 1.738387000  |
| C | 1.168541000  | 0.685994000  | -2.521205000 | H                                  | -5.703790000 | 0.874988000  | 2.813554000  |
| O | 1.583251000  | 0.887839000  | -3.678223000 | H                                  | -5.211172000 | 2.819079000  | -0.286221000 |
| C | -0.742256000 | -0.617495000 | -3.126761000 | H                                  | -3.083461000 | -4.250435000 | -1.992238000 |
| C | -1.656704000 | 0.154667000  | -3.876278000 | H                                  | -9.590969000 | -0.813435000 | 0.233963000  |
| C | -1.778913000 | 1.641359000  | -3.651154000 | H                                  | -6.105799000 | 0.647918000  | -4.663526000 |
| H | -1.964439000 | 1.865981000  | -2.596179000 | H                                  | -5.400911000 | -4.662853000 | 1.614837000  |
| H | -2.599358000 | 2.056330000  | -4.242365000 | H                                  | -7.944087000 | 0.879494000  | 3.833694000  |
| H | -0.856502000 | 2.159574000  | -3.936988000 | H                                  | -5.978843000 | 4.176573000  | -2.198108000 |
| C | -2.437211000 | -0.487938000 | -4.846754000 | H                                  | -4.145166000 | -5.702250000 | -0.267978000 |
| H | -3.144131000 | 0.097873000  | -5.428215000 | H                                  | -9.909586000 | 0.036153000  | 2.556841000  |
| C | -2.321072000 | -1.861432000 | -5.071610000 | H                                  | -6.449810000 | 3.097843000  | -4.393337000 |
| H | -2.936176000 | -2.344278000 | -5.826102000 | <sup>1</sup> IM2 <sub>PF-cis</sub> |              |              |              |
| C | -1.409393000 | -2.611947000 | -4.326012000 | Ni                                 | 0.045561000  | 0.492412000  | -0.197094000 |
| H | -1.309064000 | -3.679240000 | -4.507019000 | N                                  | 0.032427000  | 0.848161000  | 1.679874000  |
| C | -0.606491000 | -2.006441000 | -3.349437000 | N                                  | 1.847979000  | 0.422585000  | 0.027846000  |
| C | 0.406435000  | -2.822622000 | -2.581262000 | N                                  | 0.469156000  | 0.122825000  | -2.027132000 |
| H | 1.420610000  | -2.430565000 | -2.717630000 | C                                  | -1.162372000 | 1.034026000  | 2.430200000  |
| H | 0.396189000  | -3.863751000 | -2.915256000 | C                                  | -1.757970000 | -0.071684000 | 3.078250000  |
| H | 0.207144000  | -2.811539000 | -1.504388000 | C                                  | -1.114660000 | -1.436892000 | 3.026144000  |

|   |              |              |              |                                    |               |              |              |
|---|--------------|--------------|--------------|------------------------------------|---------------|--------------|--------------|
| H | -0.135362000 | -1.434501000 | 3.518430000  | P                                  | -6.034553000  | -1.891488000 | -0.031653000 |
| H | -1.742484000 | -2.180011000 | 3.525090000  | F                                  | -5.414105000  | -1.945462000 | 1.487614000  |
| H | -0.950483000 | -1.763062000 | 1.993232000  | C                                  | -5.988078000  | -3.415312000 | -1.048003000 |
| C | -2.955057000 | 0.128385000  | 3.778907000  | C                                  | -7.762524000  | -2.104295000 | 0.718604000  |
| H | -3.420905000 | -0.714761000 | 4.282681000  | C                                  | -6.347112000  | -0.257153000 | -0.820279000 |
| C | -3.553399000 | 1.389332000  | 3.833582000  | C                                  | -5.785504000  | -3.343326000 | -2.434300000 |
| H | -4.482848000 | 1.527372000  | 4.379149000  | C                                  | -8.766802000  | -2.866479000 | 0.099360000  |
| C | -2.955760000 | 2.472312000  | 3.184593000  | C                                  | -7.566172000  | -0.009737000 | -1.475176000 |
| H | -3.420423000 | 3.454098000  | 3.228955000  | C                                  | -6.107217000  | -4.665880000 | -0.424485000 |
| C | -1.757349000 | 2.315040000  | 2.475053000  | C                                  | -8.096948000  | -1.402378000 | 1.892784000  |
| C | -1.108046000 | 3.494934000  | 1.790542000  | C                                  | -5.389979000  | 0.770607000  | -0.747195000 |
| H | -0.989228000 | 3.323210000  | 0.714932000  | C                                  | -5.724945000  | -4.515690000 | -3.191997000 |
| H | -0.106517000 | 3.687614000  | 2.191709000  | C                                  | -10.058805000 | -2.932214000 | 0.636203000  |
| H | -1.707804000 | 4.398936000  | 1.926904000  | C                                  | -7.810134000  | 1.230789000  | -2.069556000 |
| C | 1.243649000  | 0.876717000  | 2.275380000  | C                                  | -6.015523000  | -5.836398000 | -1.183228000 |
| O | 1.511205000  | 1.074083000  | 3.475228000  | C                                  | -9.383556000  | -1.467976000 | 2.432527000  |
| C | 2.334694000  | 0.623599000  | 1.259319000  | C                                  | -5.657370000  | 2.023021000  | -1.304951000 |
| C | 3.710709000  | 0.576277000  | 1.465184000  | C                                  | -5.832850000  | -5.763041000 | -2.567589000 |
| H | 4.111214000  | 0.738149000  | 2.459215000  | C                                  | -10.371314000 | -2.235708000 | 1.805376000  |
| C | 4.538265000  | 0.315745000  | 0.364908000  | C                                  | -6.861886000  | 2.253618000  | -1.976476000 |
| H | 5.614138000  | 0.273269000  | 0.499771000  | H                                  | -5.678370000  | -2.380343000 | -2.923637000 |
| C | 3.989554000  | 0.108633000  | -0.907478000 | H                                  | -8.556104000  | -3.418383000 | -0.810421000 |
| H | 4.607986000  | -0.096485000 | -1.773620000 | H                                  | -8.328504000  | -0.778321000 | -1.532526000 |
| C | 2.605698000  | 0.169849000  | -1.047078000 | H                                  | -6.271373000  | -4.734398000 | 0.646822000  |
| C | 1.783067000  | -0.019593000 | -2.301569000 | H                                  | -7.348928000  | -0.797797000 | 2.395782000  |
| O | 2.323046000  | -0.268035000 | -3.395654000 | H                                  | -4.442338000  | 0.592797000  | -0.254957000 |
| C | -0.518222000 | -0.032107000 | -3.040200000 | H                                  | -5.584062000  | -4.453327000 | -4.266973000 |
| C | -1.051238000 | 1.117893000  | -3.664837000 | H                                  | -10.815660000 | -3.531288000 | 0.137557000  |
| C | -0.539641000 | 2.495780000  | -3.315626000 | H                                  | -8.747071000  | 1.398349000  | -2.592212000 |
| H | -0.687358000 | 2.724169000  | -2.254074000 | H                                  | -6.096516000  | -6.801745000 | -0.692539000 |
| H | -1.055896000 | 3.260035000  | -3.902899000 | H                                  | -9.613412000  | -0.920530000 | 3.342434000  |
| H | 0.535073000  | 2.584337000  | -3.510661000 | H                                  | -4.917086000  | 2.813364000  | -1.223616000 |
| C | -2.055866000 | 0.952517000  | -4.628074000 | H                                  | -5.774557000  | -6.673085000 | -3.157345000 |
| H | -2.470571000 | 1.830322000  | -5.117231000 | H                                  | -11.372139000 | -2.288938000 | 2.224288000  |
| C | -2.523930000 | -0.319322000 | -4.966221000 | H                                  | -7.060687000  | 3.223514000  | -2.422982000 |
| H | -3.303485000 | -0.431005000 | -5.714829000 | <sup>3</sup> IM' <sub>PF-cis</sub> |               |              |              |
| C | -1.988832000 | -1.447178000 | -4.339501000 | Ni                                 | 0.370865000   | 0.176198000  | -0.252417000 |
| H | -2.353096000 | -2.437088000 | -4.602318000 | N                                  | 0.580840000   | 0.613287000  | 1.795026000  |
| C | -0.985369000 | -1.324762000 | -3.368912000 | N                                  | 2.254029000   | 0.848478000  | -0.178544000 |
| C | -0.414139000 | -2.548385000 | -2.692971000 | N                                  | 0.973489000   | -0.027823000 | -2.260117000 |
| H | 0.656232000  | -2.656718000 | -2.900926000 | C                                  | -0.423686000  | 0.469852000  | 2.789700000  |
| H | -0.920083000 | -3.453551000 | -3.039423000 | C                                  | -0.598620000  | -0.777388000 | 3.429343000  |
| H | -0.523486000 | -2.490093000 | -1.604313000 | C                                  | 0.307987000   | -1.940082000 | 3.100211000  |
| F | -4.329988000 | -1.702581000 | -0.458335000 | H                                  | 1.355477000   | -1.709970000 | 3.326574000  |

|   |              |              |              |                                    |               |              |              |
|---|--------------|--------------|--------------|------------------------------------|---------------|--------------|--------------|
| H | 0.024534000  | -2.828707000 | 3.671790000  | F                                  | -4.508374000  | -0.846892000 | 1.566144000  |
| H | 0.265249000  | -2.190233000 | 2.033665000  | C                                  | -5.142909000  | -2.389007000 | -0.552185000 |
| C | -1.623527000 | -0.916845000 | 4.376387000  | C                                  | -7.162788000  | -1.100576000 | 1.223559000  |
| H | -1.758520000 | -1.875316000 | 4.872547000  | C                                  | -5.432787000  | 0.585975000  | -0.530863000 |
| C | -2.464974000 | 0.153453000  | 4.689600000  | C                                  | -5.070864000  | -2.332977000 | -1.954940000 |
| H | -3.254564000 | 0.031373000  | 5.426281000  | C                                  | -8.092977000  | -2.066011000 | 0.800853000  |
| C | -2.286431000 | 1.380955000  | 4.046587000  | C                                  | -6.580255000  | 1.335036000  | -0.850446000 |
| H | -2.940391000 | 2.217072000  | 4.284158000  | C                                  | -4.888553000  | -3.594530000 | 0.130978000  |
| C | -1.272875000 | 1.557567000  | 3.093864000  | C                                  | -7.465171000  | -0.234446000 | 2.292834000  |
| C | -1.089925000 | 2.889056000  | 2.404366000  | C                                  | -4.151533000  | 1.008226000  | -0.940328000 |
| H | -1.146897000 | 2.785317000  | 1.314534000  | C                                  | -4.746679000  | -3.486750000 | -2.670432000 |
| H | -0.109771000 | 3.325299000  | 2.628773000  | C                                  | -9.326247000  | -2.159316000 | 1.448094000  |
| H | -1.858093000 | 3.600356000  | 2.721548000  | C                                  | -6.444949000  | 2.512375000  | -1.586442000 |
| C | 1.769165000  | 1.113907000  | 2.160715000  | C                                  | -4.558105000  | -4.736124000 | -0.596095000 |
| O | 2.147127000  | 1.469641000  | 3.304433000  | C                                  | -8.697458000  | -0.344324000 | 2.934201000  |
| C | 2.742692000  | 1.237849000  | 1.001908000  | C                                  | -4.038555000  | 2.193352000  | -1.667808000 |
| C | 4.054116000  | 1.706377000  | 1.095487000  | C                                  | -4.490033000  | -4.682599000 | -1.993760000 |
| H | 4.448049000  | 2.021802000  | 2.054274000  | C                                  | -9.626573000  | -1.302772000 | 2.511124000  |
| C | 4.824888000  | 1.750048000  | -0.072341000 | C                                  | -5.176965000  | 2.940612000  | -1.991925000 |
| H | 5.848298000  | 2.110293000  | -0.030125000 | H                                  | -5.263905000  | -1.405665000 | -2.483326000 |
| C | 4.285521000  | 1.328365000  | -1.293430000 | H                                  | -7.862265000  | -2.735995000 | -0.020310000 |
| H | 4.860886000  | 1.346792000  | -2.211414000 | H                                  | -7.564038000  | 1.006835000  | -0.532690000 |
| C | 2.966639000  | 0.871865000  | -1.307885000 | H                                  | -4.940436000  | -3.641511000 | 1.213997000  |
| C | 2.226233000  | 0.363348000  | -2.531921000 | H                                  | -6.749378000  | 0.510754000  | 2.625677000  |
| O | 2.826872000  | 0.346125000  | -3.634803000 | H                                  | -3.254471000  | 0.437197000  | -0.694388000 |
| C | 0.177272000  | -0.525737000 | -3.326075000 | H                                  | -4.690324000  | -3.447344000 | -3.753217000 |
| C | -0.540823000 | 0.370140000  | -4.149629000 | H                                  | -10.046887000 | -2.902683000 | 1.123297000  |
| C | -0.417412000 | 1.861862000  | -3.948268000 | H                                  | -7.326457000  | 3.093241000  | -1.837468000 |
| H | -0.643644000 | 2.145674000  | -2.914073000 | H                                  | -4.354404000  | -5.665086000 | -0.073604000 |
| H | -1.098440000 | 2.402949000  | -4.611535000 | H                                  | -8.932160000  | 0.316507000  | 3.762296000  |
| H | 0.602287000  | 2.208568000  | -4.152514000 | H                                  | -3.057451000  | 2.533250000  | -1.983217000 |
| C | -1.363701000 | -0.147981000 | -5.159971000 | H                                  | -4.234066000  | -5.575874000 | -2.555230000 |
| H | -1.917823000 | 0.539453000  | -5.795197000 | H                                  | -10.585838000 | -1.381689000 | 3.013415000  |
| C | -1.478126000 | -1.525977000 | -5.360056000 | H                                  | -5.074779000  | 3.859520000  | -2.561351000 |
| H | -2.119159000 | -1.913166000 | -6.147570000 | <sup>3</sup> TS <sub>2PF-cis</sub> |               |              |              |
| C | -0.762678000 | -2.402578000 | -4.540607000 | Ni                                 | -0.332039000  | -0.042863000 | -0.230263000 |
| H | -0.845980000 | -3.476305000 | -4.692965000 | N                                  | -0.051086000  | -0.025405000 | 1.750187000  |
| C | 0.068598000  | -1.921169000 | -3.519049000 | N                                  | 1.442261000   | 0.776492000  | -0.181206000 |
| C | 0.842200000  | -2.878197000 | -2.642665000 | N                                  | 0.062263000   | -0.051464000 | -2.186077000 |
| H | 1.922503000  | -2.709700000 | -2.720042000 | C                                  | -0.919116000  | -0.538108000 | 2.762869000  |
| H | 0.639287000  | -3.915303000 | -2.925355000 | C                                  | -0.988787000  | -1.935067000 | 2.959318000  |
| H | 0.580546000  | -2.754048000 | -1.585340000 | C                                  | -0.127735000  | -2.878058000 | 2.151605000  |
| F | -1.444620000 | -0.452036000 | -0.325783000 | H                                  | 0.934131000   | -2.620004000 | 2.228504000  |
| P | -5.588857000 | -0.936342000 | 0.388569000  | H                                  | -0.254839000  | -3.907756000 | 2.497459000  |



|   |              |              |              |                                    |              |              |              |
|---|--------------|--------------|--------------|------------------------------------|--------------|--------------|--------------|
| H | -0.382315000 | -2.848533000 | 1.085618000  | C                                  | -4.516256000 | -1.849360000 | -0.101023000 |
| C | -1.860912000 | -2.436779000 | 3.936291000  | C                                  | -6.403567000 | -0.050426000 | 0.937498000  |
| H | -1.915621000 | -3.511168000 | 4.094313000  | C                                  | -5.335767000 | 0.975062000  | -1.392641000 |
| C | -2.646515000 | -1.578500000 | 4.707989000  | C                                  | -3.771466000 | -2.424322000 | -1.149394000 |
| H | -3.317059000 | -1.981251000 | 5.462294000  | C                                  | -7.529911000 | -0.529893000 | 0.243562000  |
| C | -2.565102000 | -0.199317000 | 4.504784000  | C                                  | -5.197736000 | 0.549826000  | -2.721341000 |
| H | -3.176538000 | 0.472821000  | 5.102171000  | C                                  | -5.082995000 | -2.695357000 | 0.869304000  |
| C | -1.708519000 | 0.342022000  | 3.535990000  | C                                  | -6.574195000 | 0.375665000  | 2.263333000  |
| C | -1.635516000 | 1.836059000  | 3.333548000  | C                                  | -5.948057000 | 2.209199000  | -1.120466000 |
| H | -1.764646000 | 2.102146000  | 2.279295000  | C                                  | -3.633948000 | -3.810292000 | -1.240684000 |
| H | -0.663764000 | 2.231461000  | 3.650218000  | C                                  | -8.784482000 | -0.584934000 | 0.853197000  |
| H | -2.412733000 | 2.342912000  | 3.912413000  | C                                  | -5.689313000 | 1.341227000  | -3.763227000 |
| C | 1.112085000  | 0.551262000  | 2.161144000  | C                                  | -4.910191000 | -4.079576000 | 0.794199000  |
| O | 1.515452000  | 0.690371000  | 3.329897000  | C                                  | -7.832774000 | 0.325405000  | 2.877754000  |
| C | 1.979316000  | 1.021478000  | 1.010401000  | C                                  | -6.403049000 | 3.013950000  | -2.167550000 |
| C | 3.244195000  | 1.605340000  | 1.086088000  | C                                  | -4.198210000 | -4.641870000 | -0.268293000 |
| H | 3.695953000  | 1.811857000  | 2.049188000  | C                                  | -8.940473000 | -0.154894000 | 2.176620000  |
| C | 3.901984000  | 1.898709000  | -0.116740000 | C                                  | -6.284987000 | 2.576183000  | -3.490624000 |
| H | 4.886235000  | 2.355554000  | -0.090862000 | H                                  | -3.289291000 | -1.796425000 | -1.886741000 |
| C | 3.314710000  | 1.591111000  | -1.352145000 | H                                  | -7.434970000 | -0.867593000 | -0.785578000 |
| H | 3.821518000  | 1.786799000  | -2.289788000 | H                                  | -4.717315000 | -0.392998000 | -2.954394000 |
| C | 2.047470000  | 1.007579000  | -1.342504000 | H                                  | -5.653543000 | -2.282321000 | 1.692061000  |
| C | 1.248078000  | 0.521744000  | -2.535144000 | H                                  | -5.727400000 | 0.748630000  | 2.827415000  |
| O | 1.718006000  | 0.646066000  | -3.680397000 | H                                  | -6.075470000 | 2.545528000  | -0.096064000 |
| C | -0.727968000 | -0.591762000 | -3.246726000 | H                                  | -3.073211000 | -4.235982000 | -2.067157000 |
| C | -1.509870000 | 0.262188000  | -4.054666000 | H                                  | -9.638290000 | -0.960223000 | 0.296044000  |
| C | -1.508490000 | 1.755432000  | -3.832953000 | H                                  | -5.595311000 | 0.994407000  | -4.787814000 |
| H | -1.744060000 | 2.004632000  | -2.792657000 | H                                  | -5.339938000 | -4.714408000 | 1.563140000  |
| H | -2.243889000 | 2.243662000  | -4.478134000 | H                                  | -7.940856000 | 0.662214000  | 3.905052000  |
| H | -0.525263000 | 2.187075000  | -4.051807000 | H                                  | -6.860848000 | 3.973604000  | -1.946907000 |
| C | -2.284690000 | -0.304398000 | -5.076498000 | H                                  | -4.078649000 | -5.719283000 | -0.335654000 |
| H | -2.888984000 | 0.347208000  | -5.702693000 | H                                  | -9.916033000 | -0.194190000 | 2.652757000  |
| C | -2.290580000 | -1.683137000 | -5.298690000 | H                                  | -6.655573000 | 3.193368000  | -4.303765000 |
| H | -2.897246000 | -2.105678000 | -6.095008000 | <sup>3</sup> IM2 <sub>PF-cis</sub> |              |              |              |
| C | -1.511266000 | -2.515350000 | -4.492620000 | Ni                                 | -0.219872000 | 0.266013000  | -0.103344000 |
| H | -1.506536000 | -3.588800000 | -4.665786000 | N                                  | -0.260561000 | 0.658091000  | 1.827979000  |
| C | -0.720499000 | -1.987339000 | -3.461711000 | N                                  | 1.696711000  | 0.286555000  | 0.212924000  |
| C | 0.133665000  | -2.898061000 | -2.611489000 | N                                  | 0.369349000  | -0.112004000 | -1.944834000 |
| H | 1.188478000  | -2.603339000 | -2.639174000 | C                                  | -1.423587000 | 0.844570000  | 2.635310000  |
| H | 0.059394000  | -3.932452000 | -2.958533000 | C                                  | -1.970496000 | -0.251349000 | 3.337355000  |
| H | -0.173208000 | -2.872416000 | -1.559287000 | C                                  | -1.313618000 | -1.610165000 | 3.281613000  |
| F | -3.098825000 | 0.145694000  | -0.663327000 | H                                  | -0.301932000 | -1.584558000 | 3.702203000  |
| P | -4.745007000 | -0.026966000 | 0.027747000  | H                                  | -1.895411000 | -2.345088000 | 3.844757000  |
| F | -4.067811000 | 0.803981000  | 1.259370000  | H                                  | -1.218846000 | -1.966351000 | 2.249213000  |

|   |              |              |              |                                |               |              |              |
|---|--------------|--------------|--------------|--------------------------------|---------------|--------------|--------------|
| C | -3.138902000 | -0.053272000 | 4.086486000  | C                              | -7.137460000  | -1.783042000 | 0.722354000  |
| H | -3.566426000 | -0.892105000 | 4.630368000  | C                              | -6.584796000  | 0.078695000  | -1.278178000 |
| C | -3.756785000 | 1.198250000  | 4.139132000  | C                              | -6.073571000  | -3.042721000 | -2.849330000 |
| H | -4.662246000 | 1.335578000  | 4.723844000  | C                              | -8.172602000  | -2.704168000 | 0.490725000  |
| C | -3.206202000 | 2.272075000  | 3.436113000  | C                              | -7.966801000  | 0.095716000  | -1.533192000 |
| H | -3.684570000 | 3.247742000  | 3.474693000  | C                              | -5.592314000  | -4.209708000 | -0.776085000 |
| C | -2.037456000 | 2.115014000  | 2.677354000  | C                              | -7.173705000  | -1.037139000 | 1.916214000  |
| C | -1.446669000 | 3.283893000  | 1.924505000  | C                              | -5.826022000  | 1.232083000  | -1.545198000 |
| H | -1.387545000 | 3.080853000  | 0.848618000  | C                              | -6.082158000  | -4.262489000 | -3.530358000 |
| H | -0.426563000 | 3.504118000  | 2.259112000  | C                              | -9.204593000  | -2.880985000 | 1.420823000  |
| H | -2.052233000 | 4.182974000  | 2.068452000  | C                              | -8.571866000  | 1.234266000  | -2.071278000 |
| C | 0.961152000  | 0.750048000  | 2.424646000  | C                              | -5.570606000  | -5.424235000 | -1.467994000 |
| O | 1.199905000  | 0.989437000  | 3.620933000  | C                              | -8.200143000  | -1.212988000 | 2.847304000  |
| C | 2.109669000  | 0.527415000  | 1.453298000  | C                              | -6.443807000  | 2.382070000  | -2.042347000 |
| C | 3.478953000  | 0.553709000  | 1.719813000  | C                              | -5.823903000  | -5.453409000 | -2.842818000 |
| H | 3.842391000  | 0.748008000  | 2.722120000  | C                              | -9.221167000  | -2.138197000 | 2.603213000  |
| C | 4.356172000  | 0.321912000  | 0.649760000  | C                              | -7.814853000  | 2.383428000  | -2.316949000 |
| H | 5.427106000  | 0.335781000  | 0.825761000  | H                              | -6.251458000  | -2.120907000 | -3.394139000 |
| C | 3.873679000  | 0.073807000  | -0.644041000 | H                              | -8.188936000  | -3.295971000 | -0.418316000 |
| H | 4.543507000  | -0.104623000 | -1.477076000 | H                              | -8.578760000  | -0.773599000 | -1.321607000 |
| C | 2.490829000  | 0.063803000  | -0.829589000 | H                              | -5.416279000  | -4.201233000 | 0.295455000  |
| C | 1.719765000  | -0.171465000 | -2.118909000 | H                              | -6.394500000  | -0.311909000 | 2.127843000  |
| O | 2.335243000  | -0.383305000 | -3.177934000 | H                              | -4.758421000  | 1.231223000  | -1.364723000 |
| C | -0.471182000 | -0.316943000 | -3.081129000 | H                              | -6.279667000  | -4.279918000 | -4.598073000 |
| C | -0.988068000 | 0.804463000  | -3.765183000 | H                              | -9.991123000  | -3.602184000 | 1.216847000  |
| C | -0.616301000 | 2.206209000  | -3.342032000 | H                              | -9.636486000  | 1.223539000  | -2.284810000 |
| H | -0.911498000 | 2.404516000  | -2.304706000 | H                              | -5.365335000  | -6.344787000 | -0.929802000 |
| H | -1.104674000 | 2.946261000  | -3.982046000 | H                              | -8.200979000  | -0.628138000 | 3.762940000  |
| H | 0.465866000  | 2.370183000  | -3.397181000 | H                              | -5.848883000  | 3.271902000  | -2.225704000 |
| C | -1.852364000 | 0.591630000  | -4.848671000 | H                              | -5.819700000  | -6.399269000 | -3.376457000 |
| H | -2.253731000 | 1.450137000  | -5.381681000 | H                              | -10.019361000 | -2.277083000 | 3.326793000  |
| C | -2.198846000 | -0.700754000 | -5.248633000 | H                              | -8.290104000  | 3.273666000  | -2.718411000 |
| H | -2.869972000 | -0.850151000 | -6.090011000 | <sup>1</sup> TS <sub>3PF</sub> |               |              |              |
| C | -1.681539000 | -1.800375000 | -4.560257000 | F                              | -7.041057000  | 4.435893000  | 1.694196000  |
| H | -1.952309000 | -2.807765000 | -4.866856000 | P                              | -7.849295000  | 3.215085000  | 0.784980000  |
| C | -0.815720000 | -1.629389000 | -3.470870000 | C                              | -7.381495000  | 4.076501000  | -0.771946000 |
| C | -0.267973000 | -2.825382000 | -2.728947000 | C                              | -6.906367000  | 1.916175000  | 1.688265000  |
| H | 0.823610000  | -2.881614000 | -2.808885000 | C                              | -9.431460000  | 3.737826000  | 1.543119000  |
| H | -0.684375000 | -3.753795000 | -3.129384000 | C                              | -8.235295000  | 4.021940000  | -1.887834000 |
| H | -0.505819000 | -2.775911000 | -1.660097000 | C                              | -7.456967000  | 0.634119000  | 1.865933000  |
| F | -4.364914000 | -1.050807000 | -1.536078000 | C                              | -9.941111000  | 3.067191000  | 2.663074000  |
| P | -5.791378000 | -1.421346000 | -0.562660000 | C                              | -6.230364000  | 4.881383000  | -0.830382000 |
| F | -4.717198000 | -1.252792000 | 0.667387000  | C                              | -5.673587000  | 2.216163000  | 2.294951000  |
| C | -5.840166000 | -3.014084000 | -1.466100000 | C                              | -10.069623000 | 4.897384000  | 1.078272000  |

|    |               |              |              |                               |               |              |              |
|----|---------------|--------------|--------------|-------------------------------|---------------|--------------|--------------|
| C  | -7.955060000  | 4.780453000  | -3.027122000 | H                             | -12.290313000 | 0.681247000  | 2.074497000  |
| C  | -6.803092000  | -0.313788000 | 2.657045000  | C                             | -11.140562000 | -1.483241000 | -1.426849000 |
| C  | -11.082642000 | 3.551700000  | 3.308613000  | O                             | -12.328278000 | -1.837539000 | -1.305918000 |
| C  | -5.939475000  | 5.612453000  | -1.984252000 | C                             | -10.055801000 | -2.499473000 | -1.647352000 |
| C  | -5.008904000  | 1.253515000  | 3.057968000  | C                             | -10.191393000 | -3.884127000 | -1.694262000 |
| C  | -11.213489000 | 5.373537000  | 1.724307000  | H                             | -11.164718000 | -4.330377000 | -1.526819000 |
| C  | -6.806351000  | 5.574319000  | -3.080183000 | C                             | -9.054872000  | -4.654839000 | -1.965982000 |
| C  | -5.576752000  | -0.008670000 | 3.253009000  | H                             | -9.132031000  | -5.736476000 | -2.006175000 |
| C  | -11.720490000 | 4.704405000  | 2.842343000  | C                             | -7.822399000  | -4.034301000 | -2.200003000 |
| H  | -9.125555000  | 3.406250000  | -1.862705000 | H                             | -6.926932000  | -4.598599000 | -2.432737000 |
| H  | -8.396587000  | 0.375683000  | 1.396259000  | C                             | -7.758487000  | -2.644810000 | -2.138189000 |
| H  | -9.452228000  | 2.177175000  | 3.044768000  | C                             | -6.564806000  | -1.775468000 | -2.416358000 |
| H  | -5.567376000  | 4.948885000  | 0.022765000  | O                             | -5.490230000  | -2.280459000 | -2.792927000 |
| H  | -5.235053000  | 3.198941000  | 2.181930000  | C                             | -5.842632000  | 0.482896000  | -2.567888000 |
| H  | -9.677185000  | 5.437006000  | 0.222395000  | C                             | -4.719876000  | 0.643578000  | -1.722910000 |
| H  | -8.635219000  | 4.744651000  | -3.872841000 | C                             | -4.545545000  | -0.194223000 | -0.481799000 |
| H  | -7.253297000  | -1.291756000 | 2.798963000  | H                             | -5.462615000  | -0.240152000 | 0.109661000  |
| H  | -11.468770000 | 3.026639000  | 4.177334000  | H                             | -3.748388000  | 0.208124000  | 0.148337000  |
| H  | -5.040081000  | 6.219946000  | -2.019103000 | H                             | -4.282468000  | -1.224258000 | -0.749515000 |
| H  | -4.051581000  | 1.497754000  | 3.508568000  | C                             | -3.729444000  | 1.566452000  | -2.087489000 |
| H  | -11.702280000 | 6.270359000  | 1.355153000  | H                             | -2.865602000  | 1.694678000  | -1.439716000 |
| H  | -6.586955000  | 6.157857000  | -3.969558000 | C                             | -3.830509000  | 2.306244000  | -3.266374000 |
| H  | -5.066049000  | -0.749301000 | 3.861490000  | H                             | -3.052115000  | 3.015029000  | -3.535467000 |
| H  | -12.605945000 | 5.079556000  | 3.347027000  | C                             | -4.933407000  | 2.124299000  | -4.102177000 |
| Ni | -8.719107000  | -0.113948000 | -1.732579000 | H                             | -5.008132000  | 2.685431000  | -5.030213000 |
| N  | -10.635384000 | -0.227906000 | -1.421815000 | C                             | -5.949606000  | 1.217434000  | -3.771622000 |
| N  | -8.859175000  | -1.937948000 | -1.857500000 | C                             | -7.108924000  | 1.010986000  | -4.717455000 |
| N  | -6.860508000  | -0.466292000 | -2.242635000 | H                             | -7.277959000  | -0.051179000 | -4.921776000 |
| C  | -11.549498000 | 0.858288000  | -1.280545000 | H                             | -6.923848000  | 1.519087000  | -5.667995000 |
| C  | -11.843273000 | 1.663594000  | -2.405051000 | H                             | -8.043163000  | 1.409647000  | -4.307405000 |
| C  | -11.230657000 | 1.384900000  | -3.758092000 | F                             | -8.657847000  | 1.959716000  | -0.167426000 |
| H  | -11.281179000 | 0.321517000  | -4.012131000 | <sup>1</sup> PC <sub>PF</sub> |               |              |              |
| H  | -11.749822000 | 1.950443000  | -4.536975000 | F                             | -7.128612000  | 5.763059000  | 2.555490000  |
| H  | -10.173729000 | 1.671808000  | -3.795790000 | P                             | -7.934627000  | 4.245425000  | 2.401788000  |
| C  | -12.754968000 | 2.718791000  | -2.258971000 | C                             | -7.669065000  | 4.304550000  | 0.583682000  |
| H  | -12.989803000 | 3.337020000  | -3.121923000 | C                             | -6.670397000  | 3.444902000  | 3.476441000  |
| C  | -13.374775000 | 2.969776000  | -1.033848000 | C                             | -9.446063000  | 4.978673000  | 3.150354000  |
| H  | -14.082129000 | 3.788927000  | -0.937377000 | C                             | -8.652712000  | 3.822706000  | -0.294172000 |
| C  | -13.085782000 | 2.159150000  | 0.065240000  | C                             | -6.430720000  | 2.062076000  | 3.388264000  |
| H  | -13.568048000 | 2.350442000  | 1.020127000  | C                             | -10.270661000 | 4.203102000  | 3.982430000  |
| C  | -12.173801000 | 1.100305000  | -0.034885000 | C                             | -6.478315000  | 4.833595000  | 0.058498000  |
| C  | -11.897584000 | 0.224860000  | 1.162435000  | C                             | -5.924815000  | 4.206988000  | 4.393801000  |
| H  | -10.825204000 | 0.054125000  | 1.296567000  | C                             | -9.788066000  | 6.317821000  | 2.900179000  |
| H  | -12.365618000 | -0.758607000 | 1.041088000  | C                             | -8.454061000  | 3.883215000  | -1.675928000 |

|    |               |              |              |                               |               |              |              |
|----|---------------|--------------|--------------|-------------------------------|---------------|--------------|--------------|
| C  | -5.455349000  | 1.460795000  | 4.188299000  | C                             | -11.317123000 | -2.030727000 | -2.625724000 |
| C  | -11.409641000 | 4.764277000  | 4.565684000  | O                             | -12.504142000 | -2.273218000 | -2.338804000 |
| C  | -6.271964000  | 4.865829000  | -1.323252000 | C                             | -10.367951000 | -3.135834000 | -3.029292000 |
| C  | -4.966654000  | 3.596893000  | 5.207332000  | C                             | -10.632565000 | -4.497552000 | -3.147355000 |
| C  | -10.944605000 | 6.865848000  | 3.461792000  | H                             | -11.628657000 | -4.870900000 | -2.939705000 |
| C  | -7.261629000  | 4.397824000  | -2.193703000 | C                             | -9.586933000  | -5.346262000 | -3.533699000 |
| C  | -4.723372000  | 2.224330000  | 5.102182000  | H                             | -9.767845000  | -6.411623000 | -3.632616000 |
| C  | -11.753506000 | 6.093745000  | 4.301182000  | C                             | -8.309632000  | -4.832092000 | -3.792558000 |
| H  | -9.572644000  | 3.402384000  | 0.094027000  | H                             | -7.484089000  | -5.467663000 | -4.091368000 |
| H  | -7.008038000  | 1.452209000  | 2.705001000  | C                             | -8.110335000  | -3.461043000 | -3.656021000 |
| H  | -10.025208000 | 3.165496000  | 4.176896000  | C                             | -6.837166000  | -2.675274000 | -3.872147000 |
| H  | -5.713913000  | 5.218057000  | 0.723610000  | O                             | -5.780409000  | -3.238371000 | -4.213164000 |
| H  | -6.091500000  | 5.273548000  | 4.473941000  | C                             | -6.003041000  | -0.409438000 | -3.765201000 |
| H  | -9.156922000  | 6.931183000  | 2.268139000  | C                             | -5.131017000  | -0.190312000 | -2.674876000 |
| H  | -9.230370000  | 3.520082000  | -2.342593000 | C                             | -5.268729000  | -0.991913000 | -1.402460000 |
| H  | -5.275354000  | 0.393413000  | 4.099847000  | H                             | -6.278628000  | -0.911964000 | -0.985155000 |
| H  | -12.030424000 | 4.158855000  | 5.219638000  | H                             | -4.557327000  | -0.645676000 | -0.647905000 |
| H  | -5.341033000  | 5.262980000  | -1.717167000 | H                             | -5.081949000  | -2.056914000 | -1.581616000 |
| H  | -4.407749000  | 4.198204000  | 5.918358000  | C                             | -4.129623000  | 0.781613000  | -2.803225000 |
| H  | -11.206668000 | 7.897949000  | 3.248192000  | H                             | -3.452127000  | 0.957150000  | -1.971386000 |
| H  | -7.104161000  | 4.433883000  | -3.267802000 | C                             | -3.994777000  | 1.523138000  | -3.979335000 |
| H  | -3.971330000  | 1.753488000  | 5.728755000  | H                             | -3.214162000  | 2.274317000  | -4.062614000 |
| H  | -12.645580000 | 6.524920000  | 4.746283000  | C                             | -4.866154000  | 1.298454000  | -5.047578000 |
| Ni | -8.832624000  | -0.895724000 | -3.121601000 | H                             | -4.759854000  | 1.873802000  | -5.963788000 |
| N  | -10.683186000 | -0.838427000 | -2.637838000 | C                             | -5.880303000  | 0.334880000  | -4.960109000 |
| N  | -9.134952000  | -2.681478000 | -3.287139000 | C                             | -6.809131000  | 0.089203000  | -6.126031000 |
| N  | -7.052870000  | -1.362501000 | -3.643961000 | H                             | -6.758131000  | -0.951321000 | -6.465646000 |
| C  | -11.359129000 | 0.354927000  | -2.258411000 | H                             | -6.549713000  | 0.735370000  | -6.969048000 |
| C  | -11.854177000 | 1.215792000  | -3.263927000 | H                             | -7.853958000  | 0.283157000  | -5.858319000 |
| C  | -11.719955000 | 0.857198000  | -4.725621000 | F                             | -8.765406000  | 2.743602000  | 2.225297000  |
| H  | -12.199866000 | -0.102333000 | -4.948224000 | <sup>3</sup> PC <sub>PF</sub> |               |              |              |
| H  | -12.180738000 | 1.623194000  | -5.355218000 | F                             | -6.639628000  | 5.465313000  | 3.022065000  |
| H  | -10.669021000 | 0.760864000  | -5.021065000 | P                             | -7.616690000  | 4.400366000  | 2.075580000  |
| C  | -12.488204000 | 2.404120000  | -2.876114000 | C                             | -7.025928000  | 5.219973000  | 0.541488000  |
| H  | -12.877062000 | 3.071254000  | -3.641291000 | C                             | -6.706959000  | 2.959839000  | 2.761477000  |
| C  | -12.629464000 | 2.735220000  | -1.526413000 | C                             | -9.120473000  | 5.023384000  | 2.926137000  |
| H  | -13.124026000 | 3.659766000  | -1.241544000 | C                             | -6.823815000  | 4.473267000  | -0.631083000 |
| C  | -12.130256000 | 1.877399000  | -0.543517000 | C                             | -7.385157000  | 1.762438000  | 3.042891000  |
| H  | -12.237478000 | 2.136457000  | 0.506821000  | C                             | -9.077317000  | 5.358261000  | 4.289583000  |
| C  | -11.486000000 | 0.681796000  | -0.889148000 | C                             | -6.773073000  | 6.601840000  | 0.528592000  |
| C  | -10.944378000 | -0.238250000 | 0.178588000  | C                             | -5.327819000  | 3.045248000  | 3.013354000  |
| H  | -9.886524000  | -0.467899000 | 0.008105000  | C                             | -10.324873000 | 5.172372000  | 2.218811000  |
| H  | -11.480684000 | -1.194234000 | 0.189206000  | C                             | -6.361461000  | 5.098130000  | -1.792352000 |
| H  | -11.042789000 | 0.215767000  | 1.168125000  | C                             | -6.695404000  | 0.673611000  | 3.582732000  |

|    |               |              |              |   |               |              |              |
|----|---------------|--------------|--------------|---|---------------|--------------|--------------|
| C  | -10.226270000 | 5.820072000  | 4.937149000  | H | -13.050318000 | 2.008794000  | 0.333712000  |
| C  | -6.338744000  | 7.226967000  | -0.643238000 | C | -12.041713000 | 0.552446000  | -0.887651000 |
| C  | -4.636809000  | 1.943550000  | 3.524774000  | C | -11.385401000 | -0.145104000 | 0.280110000  |
| C  | -11.463197000 | 5.663147000  | 2.863796000  | H | -10.294401000 | -0.160458000 | 0.174695000  |
| C  | -6.125147000  | 6.476259000  | -1.803507000 | H | -11.710703000 | -1.188702000 | 0.358888000  |
| C  | -5.319516000  | 0.758755000  | 3.817569000  | H | -11.631092000 | 0.357480000  | 1.219576000  |
| C  | -11.418866000 | 5.980718000  | 4.224915000  | C | -11.433571000 | -2.251906000 | -2.387527000 |
| H  | -7.023756000  | 3.408407000  | -0.639112000 | O | -12.606425000 | -2.589161000 | -2.152171000 |
| H  | -8.447429000  | 1.679675000  | 2.845061000  | C | -10.376317000 | -3.313792000 | -2.648717000 |
| H  | -8.152430000  | 5.257719000  | 4.845331000  | C | -10.533535000 | -4.700073000 | -2.666626000 |
| H  | -6.915355000  | 7.188847000  | 1.428238000  | H | -11.502053000 | -5.148643000 | -2.478881000 |
| H  | -4.793796000  | 3.966158000  | 2.810217000  | C | -9.399417000  | -5.481389000 | -2.934931000 |
| H  | -10.374994000 | 4.909411000  | 1.168715000  | H | -9.490170000  | -6.562768000 | -2.955971000 |
| H  | -6.193406000  | 4.507250000  | -2.687831000 | C | -8.150223000  | -4.890004000 | -3.176269000 |
| H  | -7.233265000  | -0.241771000 | 3.811412000  | H | -7.268976000  | -5.485482000 | -3.384281000 |
| H  | -10.185009000 | 6.060940000  | 5.995327000  | C | -8.074190000  | -3.497292000 | -3.139909000 |
| H  | -6.161161000  | 8.298373000  | -0.644970000 | C | -6.853233000  | -2.618360000 | -3.363910000 |
| H  | -3.567585000  | 2.015944000  | 3.700873000  | O | -5.754011000  | -3.139794000 | -3.618544000 |
| H  | -12.384565000 | 5.789343000  | 2.302892000  | C | -6.067828000  | -0.352897000 | -3.424766000 |
| H  | -5.776471000  | 6.961991000  | -2.710308000 | C | -5.227517000  | -0.041580000 | -2.333469000 |
| H  | -4.782813000  | -0.092655000 | 4.226034000  | C | -5.408377000  | -0.725242000 | -0.999066000 |
| H  | -12.307837000 | 6.351085000  | 4.727245000  | H | -6.427381000  | -0.593988000 | -0.617226000 |
| Ni | -9.015263000  | -0.862557000 | -2.855533000 | H | -4.711256000  | -0.322078000 | -0.259542000 |
| N  | -10.935105000 | -0.984780000 | -2.448289000 | H | -5.234683000  | -1.804657000 | -1.075083000 |
| N  | -9.174157000  | -2.796694000 | -2.882589000 | C | -4.222211000  | 0.919016000  | -2.512876000 |
| N  | -7.132317000  | -1.288900000 | -3.253791000 | H | -3.571186000  | 1.164918000  | -1.677465000 |
| C  | -11.824336000 | 0.106846000  | -2.209384000 | C | -4.049972000  | 1.560222000  | -3.741797000 |
| C  | -12.428264000 | 0.758919000  | -3.305961000 | H | -3.266118000  | 2.302540000  | -3.864812000 |
| C  | -12.188951000 | 0.278047000  | -4.717864000 | C | -4.890917000  | 1.244218000  | -4.811014000 |
| H  | -12.521536000 | -0.757530000 | -4.852336000 | H | -4.759625000  | 1.741104000  | -5.769166000 |
| H  | -12.726966000 | 0.902706000  | -5.436260000 | C | -5.908137000  | 0.288959000  | -4.671882000 |
| H  | -11.123365000 | 0.302106000  | -4.975116000 | C | -6.812470000  | -0.045311000 | -5.834945000 |
| C  | -13.255979000 | 1.863379000  | -3.058187000 | H | -6.767958000  | -1.110553000 | -6.087660000 |
| H  | -13.725675000 | 2.371048000  | -3.897120000 | H | -6.528679000  | 0.526848000  | -6.722589000 |
| C  | -13.483132000 | 2.314055000  | -1.755959000 | H | -7.861153000  | 0.180197000  | -5.606278000 |
| H  | -14.127052000 | 3.171330000  | -1.579732000 | F | -8.592647000  | 3.332649000  | 1.131345000  |
| C  | -12.877005000 | 1.659444000  | -0.681202000 |   |               |              |              |

### VIII) Difluorination of PPh<sub>3</sub> by the cooperation of two 1F<sub>s</sub>

|                                 |              |             |             |   |              |              |              |
|---------------------------------|--------------|-------------|-------------|---|--------------|--------------|--------------|
| <sup>1</sup> RC <sub>2,PF</sub> |              |             |             | N | -0.618726000 | 1.342627000  | -0.340246000 |
| Ni                              | -1.313715000 | 0.773726000 | 1.380910000 | C | -2.821403000 | -0.023487000 | 3.842384000  |
| N                               | -1.602763000 | 0.413734000 | 3.279546000 | C | -3.280085000 | -1.332805000 | 3.560589000  |
| N                               | 0.321731000  | 1.356544000 | 1.980831000 | C | -2.461975000 | -2.269633000 | 2.710799000  |

|   |              |              |              |    |               |              |              |
|---|--------------|--------------|--------------|----|---------------|--------------|--------------|
| H | -1.426734000 | -2.334133000 | 3.060530000  | P  | -6.855791000  | -0.320378000 | 2.040877000  |
| H | -2.892309000 | -3.274915000 | 2.710612000  | C  | -8.562736000  | -0.689034000 | 2.512207000  |
| H | -2.441777000 | -1.886747000 | 1.686825000  | C  | -6.612968000  | 1.446438000  | 1.790456000  |
| C | -4.511205000 | -1.741130000 | 4.075848000  | C  | -6.358557000  | -1.314040000 | 0.622911000  |
| H | -4.858419000 | -2.752285000 | 3.880805000  | C  | -9.444197000  | -1.368295000 | 1.650446000  |
| C | -5.297157000 | -0.875992000 | 4.853020000  | C  | -7.670985000  | 2.357181000  | 1.986067000  |
| H | -6.238532000 | -1.222768000 | 5.268439000  | C  | -5.781150000  | -0.749588000 | -0.530000000 |
| C | -4.833228000 | 0.411348000  | 5.132490000  | C  | -9.002577000  | -0.297544000 | 3.792053000  |
| H | -5.435336000 | 1.083405000  | 5.738182000  | C  | -5.319251000  | 1.919107000  | 1.479342000  |
| C | -3.606006000 | 0.858227000  | 4.636047000  | C  | -6.490919000  | -2.716105000 | 0.721169000  |
| C | -3.143073000 | 2.262888000  | 4.925503000  | C  | -10.749153000 | -1.633339000 | 2.062698000  |
| H | -2.828613000 | 2.771100000  | 4.007605000  | C  | -7.441580000  | 3.723476000  | 1.847100000  |
| H | -2.279122000 | 2.255752000  | 5.597850000  | C  | -5.379435000  | -1.574362000 | -1.578603000 |
| H | -3.941079000 | 2.848229000  | 5.389368000  | C  | -10.310665000 | -0.562458000 | 4.190921000  |
| C | -0.556757000 | 0.719071000  | 4.090342000  | C  | -5.113088000  | 3.290444000  | 1.335712000  |
| O | -0.469334000 | 0.587903000  | 5.321755000  | C  | -6.090647000  | -3.528825000 | -0.334863000 |
| C | 0.594213000  | 1.269433000  | 3.288241000  | C  | -11.183779000 | -1.232321000 | 3.328759000  |
| C | 1.832888000  | 1.681438000  | 3.770839000  | C  | -6.164246000  | 4.192624000  | 1.522686000  |
| H | 2.042933000  | 1.607696000  | 4.831388000  | C  | -5.533698000  | -2.959995000 | -1.485360000 |
| C | 2.767376000  | 2.182132000  | 2.857127000  | H  | -9.117899000  | -1.676068000 | 0.663593000  |
| H | 3.741264000  | 2.510689000  | 3.205822000  | H  | -8.665093000  | 2.001367000  | 2.231107000  |
| C | 2.450536000  | 2.263334000  | 1.496446000  | H  | -5.658214000  | 0.322863000  | -0.614310000 |
| H | 3.147930000  | 2.648601000  | 0.761906000  | H  | -8.325833000  | 0.210884000  | 4.471547000  |
| C | 1.192769000  | 1.833035000  | 1.083830000  | H  | -4.485003000  | 1.232122000  | 1.336493000  |
| C | 0.640199000  | 1.842560000  | -0.319665000 | H  | -6.909469000  | -3.166751000 | 1.615715000  |
| O | 1.324735000  | 2.271501000  | -1.264498000 | H  | -11.427793000 | -2.149421000 | 1.390975000  |
| C | -1.336543000 | 1.329967000  | -1.568947000 | H  | -8.260641000  | 4.421572000  | 1.988597000  |
| C | -1.804324000 | 2.538199000  | -2.133364000 | H  | -4.938479000  | -1.130285000 | -2.465169000 |
| C | -1.545415000 | 3.867285000  | -1.466208000 | H  | -10.644617000 | -0.254871000 | 5.176636000  |
| H | -1.873356000 | 3.860338000  | -0.419815000 | H  | -4.121945000  | 3.654994000  | 1.083779000  |
| H | -2.065746000 | 4.666878000  | -1.998322000 | H  | -6.204785000  | -4.605261000 | -0.257431000 |
| H | -0.474846000 | 4.098057000  | -1.459717000 | H  | -12.200624000 | -1.443937000 | 3.644540000  |
| C | -2.523171000 | 2.496069000  | -3.335976000 | H  | -5.989462000  | 5.259235000  | 1.419892000  |
| H | -2.873420000 | 3.431958000  | -3.763125000 | H  | -5.215856000  | -3.597164000 | -2.304811000 |
| C | -2.781318000 | 1.282540000  | -3.972643000 | Ni | -3.363371000  | 7.427854000  | -4.466471000 |
| H | -3.336769000 | 1.262242000  | -4.906692000 | N  | -5.228949000  | 7.204327000  | -4.455719000 |
| C | -2.321826000 | 0.093613000  | -3.404620000 | N  | -3.775767000  | 9.165715000  | -4.953391000 |
| H | -2.513891000 | -0.855084000 | -3.900871000 | N  | -1.597770000  | 8.074505000  | -4.418898000 |
| C | -1.602336000 | 0.096749000  | -2.202968000 | C  | -5.910044000  | 6.021549000  | -4.050150000 |
| C | -1.136615000 | -1.199674000 | -1.589857000 | C  | -6.529716000  | 5.973739000  | -2.782547000 |
| H | -0.068579000 | -1.176854000 | -1.349558000 | C  | -6.497131000  | 7.160130000  | -1.850541000 |
| H | -1.321272000 | -2.041467000 | -2.263498000 | H  | -7.118636000  | 7.978316000  | -2.231263000 |
| H | -1.676349000 | -1.371379000 | -0.653727000 | H  | -6.872322000  | 6.885969000  | -0.861489000 |
| F | -2.914016000 | 0.164219000  | 0.789235000  | H  | -5.482071000  | 7.554876000  | -1.735902000 |

|                                  |              |              |              |   |              |              |              |
|----------------------------------|--------------|--------------|--------------|---|--------------|--------------|--------------|
| C                                | -7.176854000 | 4.792003000  | -2.403898000 | N | 0.925053000  | 1.679529000  | -1.922328000 |
| H                                | -7.650288000 | 4.739354000  | -1.427380000 | N | -0.069057000 | -0.274238000 | -3.117653000 |
| C                                | -7.212911000 | 3.688277000  | -3.255290000 | C | -0.608722000 | 0.815795000  | 1.550285000  |
| H                                | -7.719485000 | 2.778739000  | -2.945381000 | C | -0.119513000 | -0.316263000 | 2.240928000  |
| C                                | -6.593833000 | 3.752219000  | -4.503489000 | C | 1.139030000  | -1.018602000 | 1.789755000  |
| H                                | -6.622337000 | 2.892917000  | -5.168065000 | H | 1.963798000  | -0.312349000 | 1.651888000  |
| C                                | -5.930624000 | 4.911096000  | -4.920859000 | H | 1.446813000  | -1.768832000 | 2.522811000  |
| C                                | -5.252132000 | 4.966997000  | -6.266144000 | H | 0.999994000  | -1.530293000 | 0.830523000  |
| H                                | -4.173903000 | 5.097678000  | -6.134808000 | C | -0.811405000 | -0.767143000 | 3.371261000  |
| H                                | -5.612765000 | 5.806703000  | -6.869779000 | H | -0.434858000 | -1.632139000 | 3.910995000  |
| H                                | -5.424984000 | 4.045012000  | -6.827053000 | C | -1.963344000 | -0.117786000 | 3.815252000  |
| C                                | -5.967213000 | 8.313865000  | -4.824405000 | H | -2.486580000 | -0.477076000 | 4.696893000  |
| O                                | -7.188307000 | 8.394095000  | -4.908898000 | C | -2.435757000 | 1.001036000  | 3.127922000  |
| C                                | -5.059774000 | 9.476825000  | -5.125770000 | H | -3.330520000 | 1.512043000  | 3.473917000  |
| C                                | -5.406192000 | 10.766622000 | -5.514897000 | C | -1.774915000 | 1.483876000  | 1.991269000  |
| H                                | -6.448865000 | 11.025487000 | -5.655683000 | C | -2.293631000 | 2.699246000  | 1.265395000  |
| C                                | -4.375369000 | 11.695267000 | -5.706421000 | H | -2.347279000 | 2.526974000  | 0.185655000  |
| H                                | -4.615464000 | 12.708330000 | -6.010759000 | H | -1.629524000 | 3.556825000  | 1.417945000  |
| C                                | -3.038607000 | 11.332465000 | -5.499544000 | H | -3.289934000 | 2.972130000  | 1.621032000  |
| H                                | -2.223899000 | 12.035133000 | -5.628078000 | C | 0.766893000  | 2.394603000  | 0.334270000  |
| C                                | -2.769315000 | 10.024222000 | -5.110473000 | O | 0.987303000  | 3.194839000  | 1.253836000  |
| C                                | -1.438514000 | 9.398404000  | -4.789645000 | C | 1.311727000  | 2.623961000  | -1.056689000 |
| O                                | -0.385959000 | 10.023839000 | -4.860967000 | C | 2.124954000  | 3.661904000  | -1.499966000 |
| C                                | -0.463773000 | 7.345232000  | -3.960944000 | H | 2.442798000  | 4.426311000  | -0.801034000 |
| C                                | 0.072287000  | 6.323486000  | -4.774548000 | C | 2.505746000  | 3.678782000  | -2.847314000 |
| C                                | -0.535570000 | 5.993491000  | -6.114116000 | H | 3.139703000  | 4.478049000  | -3.216830000 |
| H                                | -1.535099000 | 5.573827000  | -5.967955000 | C | 2.072956000  | 2.675338000  | -3.722104000 |
| H                                | 0.076103000  | 5.262418000  | -6.648796000 | H | 2.345793000  | 2.664299000  | -4.770716000 |
| H                                | -0.639924000 | 6.881514000  | -6.746015000 | C | 1.262773000  | 1.663965000  | -3.216528000 |
| C                                | 1.180483000  | 5.611882000  | -4.303081000 | C | 0.662004000  | 0.496470000  | -3.963663000 |
| H                                | 1.605666000  | 4.827841000  | -4.923768000 | O | 0.857418000  | 0.344796000  | -5.176476000 |
| C                                | 1.739142000  | 5.891844000  | -3.056146000 | C | -0.814739000 | -1.383458000 | -3.600131000 |
| H                                | 2.593594000  | 5.322312000  | -2.702391000 | C | -1.944629000 | -1.178247000 | -4.427865000 |
| C                                | 1.191781000  | 6.897880000  | -2.260474000 | C | -2.355662000 | 0.208431000  | -4.855996000 |
| H                                | 1.621184000  | 7.112844000  | -1.285642000 | H | -2.416577000 | 0.886949000  | -3.999041000 |
| C                                | 0.087353000  | 7.640066000  | -2.693717000 | H | -3.330819000 | 0.189846000  | -5.349568000 |
| C                                | -0.494451000 | 8.720575000  | -1.815286000 | H | -1.623670000 | 0.633798000  | -5.550727000 |
| H                                | -0.274426000 | 9.716348000  | -2.215960000 | C | -2.677501000 | -2.293196000 | -4.852620000 |
| H                                | -0.077988000 | 8.664487000  | -0.806581000 | H | -3.535966000 | -2.142303000 | -5.502462000 |
| H                                | -1.583860000 | 8.637336000  | -1.742110000 | C | -2.320470000 | -3.583938000 | -4.461947000 |
| F                                | -2.966433000 | 5.738721000  | -4.032269000 | H | -2.901728000 | -4.436993000 | -4.800258000 |
| <sup>1</sup> TM1 <sub>2,PF</sub> |              |              |              | C | -1.210477000 | -3.773528000 | -3.640512000 |
| Ni                               | -0.119538000 | 0.336054000  | -1.304214000 | H | -0.923093000 | -4.778141000 | -3.341054000 |
| N                                | 0.055333000  | 1.240342000  | 0.368120000  | C | -0.444026000 | -2.687881000 | -3.199942000 |

|    |              |              |              |   |              |              |              |
|----|--------------|--------------|--------------|---|--------------|--------------|--------------|
| C  | 0.764427000  | -2.924353000 | -2.325039000 | C | -6.320469000 | 6.450915000  | -4.228982000 |
| H  | 1.617055000  | -2.317883000 | -2.643195000 | C | -6.720808000 | 7.791149000  | -3.666961000 |
| H  | 1.058297000  | -3.977190000 | -2.349243000 | H | -6.384578000 | 8.616751000  | -4.303456000 |
| H  | 0.562894000  | -2.667780000 | -1.277614000 | H | -7.806606000 | 7.862468000  | -3.555107000 |
| F  | -4.055650000 | 0.311825000  | -1.859989000 | H | -6.248197000 | 7.916887000  | -2.688611000 |
| P  | -5.540829000 | 0.214909000  | -1.277614000 | C | -7.278873000 | 5.452530000  | -4.439639000 |
| C  | -5.533920000 | -1.191028000 | -0.179453000 | H | -8.321023000 | 5.667001000  | -4.214643000 |
| C  | -5.816304000 | 1.760274000  | -0.434968000 | C | -6.917324000 | 4.197687000  | -4.929888000 |
| C  | -6.583185000 | -0.012980000 | -2.708972000 | H | -7.671641000 | 3.431581000  | -5.085789000 |
| C  | -6.429154000 | -2.256663000 | -0.375726000 | C | -5.578021000 | 3.930752000  | -5.212309000 |
| C  | -6.373816000 | 1.780394000  | 0.855619000  | H | -5.287795000 | 2.953387000  | -5.590877000 |
| C  | -7.756729000 | 0.746250000  | -2.852576000 | C | -4.589134000 | 4.904609000  | -5.018407000 |
| C  | -4.615741000 | -1.215658000 | 0.889015000  | C | -3.146333000 | 4.590891000  | -5.329497000 |
| C  | -5.462697000 | 2.960801000  | -1.082621000 | H | -2.487678000 | 4.889652000  | -4.506711000 |
| C  | -6.228798000 | -0.974275000 | -3.675343000 | H | -2.811185000 | 5.139130000  | -6.216727000 |
| C  | -6.401889000 | -3.342967000 | 0.497230000  | H | -3.008719000 | 3.521664000  | -5.512963000 |
| C  | -6.570588000 | 3.004534000  | 1.492542000  | C | -3.340684000 | 7.735971000  | -5.336200000 |
| C  | -8.576833000 | 0.535060000  | -3.960272000 | O | -3.545596000 | 7.577012000  | -6.552190000 |
| C  | -4.597093000 | -2.310235000 | 1.748311000  | C | -2.246260000 | 8.655580000  | -4.854830000 |
| C  | -5.646836000 | 4.177747000  | -0.430151000 | C | -1.391556000 | 9.429227000  | -5.634515000 |
| C  | -7.053471000 | -1.166627000 | -4.780320000 | H | -1.494564000 | 9.412848000  | -6.713187000 |
| C  | -5.488375000 | -3.370413000 | 1.553317000  | C | -0.421647000 | 10.203850000 | -4.987813000 |
| C  | -6.201960000 | 4.191924000  | 0.855066000  | H | 0.257452000  | 10.817127000 | -5.571608000 |
| C  | -8.225526000 | -0.416317000 | -4.920455000 | C | -0.320984000 | 10.188458000 | -3.591941000 |
| H  | -7.138508000 | -2.238743000 | -1.195303000 | H | 0.421179000  | 10.771404000 | -3.059254000 |
| H  | -6.647763000 | 0.858134000  | 1.355520000  | C | -1.207801000 | 9.390878000  | -2.874301000 |
| H  | -8.027004000 | 1.490945000  | -2.112147000 | C | -1.261202000 | 9.200688000  | -1.378689000 |
| H  | -3.923398000 | -0.395777000 | 1.052758000  | O | -0.438004000 | 9.768000000  | -0.639684000 |
| H  | -5.036992000 | 2.948002000  | -2.081451000 | C | -2.398598000 | 7.944283000  | 0.312016000  |
| H  | -5.317084000 | -1.554530000 | -3.576300000 | C | -1.429210000 | 7.085195000  | 0.880158000  |
| H  | -7.092927000 | -4.166182000 | 0.350189000  | C | -0.234545000 | 6.620275000  | 0.083674000  |
| H  | -7.002645000 | 3.027457000  | 2.487566000  | H | -0.527346000 | 6.323342000  | -0.929259000 |
| H  | -9.486115000 | 1.115957000  | -4.072872000 | H | 0.253271000  | 5.768829000  | 0.565913000  |
| H  | -3.887621000 | -2.330619000 | 2.568802000  | H | 0.497799000  | 7.428078000  | -0.027165000 |
| H  | -5.344541000 | 5.106191000  | -0.912090000 | C | -1.593849000 | 6.660333000  | 2.205481000  |
| H  | -6.781843000 | -1.900730000 | -5.531559000 | H | -0.847239000 | 6.001374000  | 2.642481000  |
| H  | -5.470915000 | -4.220028000 | 2.228737000  | C | -2.693435000 | 7.065253000  | 2.960840000  |
| H  | -6.342959000 | 5.140317000  | 1.364925000  | H | -2.806758000 | 6.727571000  | 3.987497000  |
| H  | -8.865666000 | -0.573783000 | -5.782801000 | C | -3.649651000 | 7.903472000  | 2.386918000  |
| Ni | -3.317422000 | 7.681082000  | -2.532365000 | H | -4.510854000 | 8.222173000  | 2.969656000  |
| N  | -3.981681000 | 7.169536000  | -4.286338000 | C | -3.521963000 | 8.350081000  | 1.066242000  |
| N  | -2.125365000 | 8.662664000  | -3.521735000 | C | -4.578839000 | 9.232293000  | 0.451637000  |
| N  | -2.272632000 | 8.365347000  | -1.040046000 | H | -4.148784000 | 10.143636000 | 0.022262000  |
| C  | -4.967973000 | 6.175715000  | -4.528374000 | H | -5.329742000 | 9.521228000  | 1.192821000  |



|                                                           |              |             |              |   |              |              |              |
|-----------------------------------------------------------|--------------|-------------|--------------|---|--------------|--------------|--------------|
| H                                                         | -5.064918000 | 8.684206000 | -0.360573000 | C | 0.973678000  | 2.252228000  | -3.599947000 |
| F                                                         | -4.567434000 | 6.808943000 | -1.555823000 | H | 1.786004000  | 1.728262000  | -4.092269000 |
| 2(L)Ni <sup>III</sup> F+ P <sup>III</sup> Ph <sub>3</sub> |              |             |              | C | 1.022458000  | 3.630546000  | -3.450660000 |
| Ni                                                        | -2.613895000 | 5.463938000 | -0.527016000 | H | 1.872481000  | 4.188200000  | -3.830171000 |
| N                                                         | -3.350256000 | 6.465895000 | 0.929522000  | C | -0.006150000 | 4.332068000  | -2.806421000 |
| N                                                         | -4.363331000 | 5.435399000 | -1.099808000 | C | 0.019316000  | 5.833359000  | -2.767638000 |
| N                                                         | -2.325795000 | 4.297329000 | -2.062648000 | H | -0.767508000 | 6.245893000  | -3.410045000 |
| C                                                         | -2.621551000 | 6.909332000 | 2.064688000  | H | 0.981782000  | 6.208998000  | -3.121786000 |
| C                                                         | -1.751340000 | 8.014259000 | 1.932296000  | H | -0.165104000 | 6.184465000  | -1.751552000 |
| C                                                         | -1.615381000 | 8.732296000 | 0.613477000  | F | -0.919217000 | 5.506735000  | 0.076693000  |
| H                                                         | -2.580925000 | 9.106230000 | 0.256063000  | P | 12.690699000 | -0.782722000 | -0.384745000 |
| H                                                         | -0.931314000 | 9.580759000 | 0.699502000  | C | 13.623701000 | 0.612594000  | 0.273109000  |
| H                                                         | -1.231546000 | 8.050572000 | -0.151504000 | C | 11.607399000 | -1.526863000 | 0.833487000  |
| C                                                         | -1.027540000 | 8.436273000 | 3.052749000  | C | 13.795980000 | -1.953590000 | -1.165428000 |
| H                                                         | -0.370598000 | 9.297926000 | 2.963598000  | C | 15.024732000 | 0.529834000  | 0.441169000  |
| C                                                         | -1.149301000 | 7.777843000 | 4.277559000  | C | 11.524974000 | -1.013312000 | 2.144806000  |
| H                                                         | -0.578358000 | 8.116567000 | 5.137428000  | C | 13.740766000 | -3.344403000 | -0.921332000 |
| C                                                         | -2.009087000 | 6.686301000 | 4.394262000  | C | 12.938779000 | 1.787831000  | 0.649021000  |
| H                                                         | -2.106540000 | 6.172382000 | 5.347088000  | C | 10.806099000 | -2.626149000 | 0.462656000  |
| C                                                         | -2.757575000 | 6.236326000 | 3.299867000  | C | 14.744570000 | -1.451397000 | -2.090890000 |
| C                                                         | -3.688932000 | 5.058437000 | 3.444354000  | C | 15.717251000 | 1.603360000  | 0.991590000  |
| H                                                         | -3.507518000 | 4.304556000 | 2.670993000  | C | 10.685862000 | -1.629918000 | 3.068511000  |
| H                                                         | -4.733581000 | 5.373396000 | 3.346555000  | C | 14.643278000 | -4.193656000 | -1.552269000 |
| H                                                         | -3.566748000 | 4.583657000 | 4.421214000  | C | 13.649898000 | 2.849187000  | 1.203589000  |
| C                                                         | -4.690240000 | 6.706096000 | 0.865755000  | C | 9.977705000  | -3.243779000 | 1.393562000  |
| O                                                         | -5.393103000 | 7.330792000 | 1.668129000  | C | 15.651764000 | -2.310621000 | -2.699795000 |
| C                                                         | -5.275601000 | 6.090483000 | -0.376348000 | C | 15.034633000 | 2.763926000  | 1.370523000  |
| C                                                         | -6.603682000 | 6.120479000 | -0.792444000 | C | 9.917719000  | -2.739916000 | 2.698890000  |
| H                                                         | -7.335740000 | 6.654817000 | -0.198530000 | C | 15.600917000 | -3.682919000 | -2.434897000 |
| C                                                         | -6.945491000 | 5.451468000 | -1.973259000 | H | 15.562743000 | -0.371599000 | 0.175864000  |
| H                                                         | -7.971736000 | 5.463709000 | -2.324381000 | H | 12.124067000 | -0.161216000 | 2.442430000  |
| C                                                         | -5.970442000 | 4.756136000 | -2.697513000 | H | 13.031743000 | -3.754858000 | -0.213134000 |
| H                                                         | -6.202426000 | 4.216117000 | -3.607628000 | H | 11.866898000 | 1.853135000  | 0.496334000  |
| C                                                         | -4.665308000 | 4.765216000 | -2.213732000 | H | 10.827671000 | -2.997289000 | -0.554579000 |
| C                                                         | -3.485528000 | 4.054663000 | -2.799425000 | H | 14.780850000 | -0.391306000 | -2.314526000 |
| O                                                         | -3.568975000 | 3.403225000 | -3.835710000 | H | 16.790402000 | 1.528879000  | 1.134878000  |
| C                                                         | -1.187113000 | 3.593752000 | -2.412193000 | H | 10.635351000 | -1.244582000 | 4.081714000  |
| C                                                         | -1.207499000 | 2.159454000 | -2.509256000 | H | 14.600084000 | -5.256653000 | -1.344322000 |
| C                                                         | -2.369832000 | 1.346037000 | -1.993761000 | H | 13.117570000 | 3.746645000  | 1.500834000  |
| H                                                         | -2.931103000 | 1.884596000 | -1.227327000 | H | 9.385695000  | -4.101036000 | 1.079371000  |
| H                                                         | -2.040707000 | 0.398599000 | -1.557159000 | H | 16.388256000 | -1.912208000 | -3.389491000 |
| H                                                         | -3.068449000 | 1.119557000 | -2.805092000 | H | 15.582525000 | 3.598259000  | 1.797429000  |
| C                                                         | -0.120421000 | 1.524348000 | -3.093087000 | H | 9.265889000  | -3.209624000 | 3.429142000  |
| H                                                         | -0.121353000 | 0.440970000 | -3.169999000 | H | 16.303504000 | -4.354214000 | -2.918314000 |

|    |              |              |              |                                 |              |              |              |
|----|--------------|--------------|--------------|---------------------------------|--------------|--------------|--------------|
| Ni | -5.217415000 | -4.685190000 | 0.377420000  | H                               | -7.598751000 | 0.000157000  | 2.437373000  |
| N  | -3.653165000 | -5.847602000 | 0.495831000  | C                               | -7.299429000 | -1.887522000 | 1.454611000  |
| N  | -6.089771000 | -6.279278000 | 0.102070000  | C                               | -6.872968000 | -2.600422000 | 2.712760000  |
| N  | -7.012986000 | -3.955520000 | 0.183197000  | H                               | -7.507151000 | -3.469340000 | 2.920774000  |
| C  | -2.306117000 | -5.440702000 | 0.695694000  | H                               | -6.915443000 | -1.930989000 | 3.576814000  |
| C  | -1.921277000 | -4.916243000 | 1.950175000  | H                               | -5.849470000 | -2.968185000 | 2.597503000  |
| C  | -2.929617000 | -4.773703000 | 3.061680000  | F                               | -4.363303000 | -3.108520000 | 0.641083000  |
| H  | -3.416756000 | -5.727600000 | 3.291692000  | <sup>3</sup> RC <sub>2,PF</sub> |              |              |              |
| H  | -2.457563000 | -4.399797000 | 3.974730000  | Ni                              | -1.313993000 | 0.771412000  | 1.381574000  |
| H  | -3.713157000 | -4.075829000 | 2.753411000  | N                               | -1.603335000 | 0.411511000  | 3.280105000  |
| C  | -0.589951000 | -4.532453000 | 2.146894000  | N                               | 0.321623000  | 1.353541000  | 1.981611000  |
| H  | -0.291625000 | -4.139995000 | 3.116079000  | N                               | -0.618514000 | 1.339582000  | -0.339597000 |
| C  | 0.355429000  | -4.665233000 | 1.129128000  | C                               | -2.822584000 | -0.024341000 | 3.842810000  |
| H  | 1.390384000  | -4.384214000 | 1.304982000  | C                               | -3.282392000 | -1.333326000 | 3.561508000  |
| C  | -0.037215000 | -5.166990000 | -0.111552000 | C                               | -2.464887000 | -2.271391000 | 2.712486000  |
| H  | 0.692537000  | -5.269513000 | -0.911562000 | H                               | -1.429715000 | -2.336315000 | 3.062327000  |
| C  | -1.362928000 | -5.551997000 | -0.350950000 | H                               | -2.895904000 | -3.276385000 | 2.713042000  |
| C  | -1.762359000 | -6.085144000 | -1.704670000 | H                               | -2.444325000 | -1.889314000 | 1.688215000  |
| H  | -2.683600000 | -5.612525000 | -2.062053000 | C                               | -4.514154000 | -1.740214000 | 4.076470000  |
| H  | -1.957583000 | -7.161865000 | -1.655435000 | H                               | -4.862181000 | -2.751175000 | 3.881838000  |
| H  | -0.974257000 | -5.910081000 | -2.442311000 | C                               | -5.299506000 | -0.874015000 | 4.853029000  |
| C  | -3.905612000 | -7.170485000 | 0.340547000  | H                               | -6.241486000 | -1.219631000 | 5.268051000  |
| O  | -3.109616000 | -8.125074000 | 0.376511000  | C                               | -4.834438000 | 0.412953000  | 5.132070000  |
| C  | -5.373762000 | -7.409569000 | 0.105478000  | H                               | -5.436084000 | 1.085906000  | 5.737230000  |
| C  | -6.002283000 | -8.635131000 | -0.095118000 | C                               | -3.606616000 | 0.858464000  | 4.635765000  |
| H  | -5.410051000 | -9.542609000 | -0.089495000 | C                               | -3.142517000 | 2.262821000  | 4.924820000  |
| C  | -7.386717000 | -8.646273000 | -0.298048000 | H                               | -2.825456000 | 2.769748000  | 4.007121000  |
| H  | -7.902640000 | -9.587828000 | -0.457316000 | H                               | -2.279921000 | 2.255197000  | 5.598923000  |
| C  | -8.108211000 | -7.447334000 | -0.296130000 | H                               | -3.940707000 | 2.849624000  | 5.386517000  |
| H  | -9.180541000 | -7.415948000 | -0.449129000 | C                               | -0.557551000 | 0.716957000  | 4.091105000  |
| C  | -7.414201000 | -6.258901000 | -0.089055000 | O                               | -0.470535000 | 0.586352000  | 5.322614000  |
| C  | -7.988261000 | -4.866976000 | -0.047796000 | C                               | 0.593776000  | 1.266778000  | 3.289118000  |
| O  | -9.207020000 | -4.680538000 | -0.209043000 | C                               | 1.832374000  | 1.678807000  | 3.771891000  |
| C  | -7.363938000 | -2.579434000 | 0.224787000  | H                               | 2.042157000  | 1.605344000  | 4.832512000  |
| C  | -7.756957000 | -1.906421000 | -0.953892000 | C                               | 2.767108000  | 2.179212000  | 2.858269000  |
| C  | -7.819377000 | -2.628950000 | -2.277035000 | H                               | 3.740935000  | 2.507798000  | 3.207109000  |
| H  | -6.906211000 | -3.206006000 | -2.458640000 | C                               | 2.450573000  | 2.260137000  | 1.497502000  |
| H  | -7.953139000 | -1.923823000 | -3.102133000 | H                               | 3.148143000  | 2.645224000  | 0.763035000  |
| H  | -8.651973000 | -3.340709000 | -2.291528000 | C                               | 1.192861000  | 1.829838000  | 1.084703000  |
| C  | -8.095933000 | -0.549327000 | -0.876969000 | C                               | 0.640537000  | 1.839257000  | -0.318888000 |
| H  | -8.405423000 | -0.032778000 | -1.782093000 | O                               | 1.325381000  | 2.267808000  | -1.263674000 |
| C  | -8.042475000 | 0.140147000  | 0.333732000  | C                               | -1.335902000 | 1.326911000  | -1.568540000 |
| H  | -8.317302000 | 1.190139000  | 0.379115000  | C                               | -1.803016000 | 2.535242000  | -2.133270000 |
| C  | -7.640440000 | -0.530555000 | 1.489143000  | C                               | -1.544019000 | 3.864253000  | -1.466019000 |

|   |               |              |              |    |               |              |              |
|---|---------------|--------------|--------------|----|---------------|--------------|--------------|
| H | -1.870067000  | 3.856576000  | -0.419067000 | H  | -4.117956000  | 3.657258000  | 1.083723000  |
| H | -2.065694000  | 4.663721000  | -1.996985000 | H  | -6.195675000  | -4.598305000 | -0.264692000 |
| H | -0.473574000  | 4.095766000  | -1.461230000 | H  | -12.198419000 | -1.442632000 | 3.642008000  |
| C | -2.521083000  | 2.493312000  | -3.336362000 | H  | -5.983392000  | 5.262927000  | 1.423261000  |
| H | -2.870901000  | 3.429299000  | -3.763657000 | H  | -5.217696000  | -3.585905000 | -2.315161000 |
| C | -2.779171000  | 1.279824000  | -3.973134000 | Ni | -3.364371000  | 7.426611000  | -4.464977000 |
| H | -3.333949000  | 1.259631000  | -4.907588000 | N  | -5.229826000  | 7.201805000  | -4.454248000 |
| C | -2.320583000  | 0.090768000  | -3.404638000 | N  | -3.777990000  | 9.164529000  | -4.950575000 |
| H | -2.512870000  | -0.857919000 | -3.900815000 | N  | -1.599217000  | 8.074455000  | -4.416750000 |
| C | -1.601902000  | 0.093722000  | -2.202513000 | C  | -5.910015000  | 6.018202000  | -4.049567000 |
| C | -1.137350000  | -1.202829000 | -1.588783000 | C  | -6.529699000  | 5.968957000  | -2.782028000 |
| H | -0.069198000  | -1.181031000 | -1.348842000 | C  | -6.498045000  | 7.154640000  | -1.849088000 |
| H | -1.323094000  | -2.044821000 | -2.261877000 | H  | -7.118837000  | 7.973314000  | -2.229913000 |
| H | -1.676991000  | -1.373367000 | -0.652393000 | H  | -6.874612000  | 6.879682000  | -0.860786000 |
| F | -2.914452000  | 0.162510000  | 0.789711000  | H  | -5.483003000  | 7.548967000  | -1.732810000 |
| P | -6.854646000  | -0.316540000 | 2.037082000  | C  | -7.175896000  | 4.786423000  | -2.404258000 |
| C | -8.561240000  | -0.685666000 | 2.508852000  | H  | -7.649348000  | 4.732694000  | -1.427804000 |
| C | -6.610820000  | 1.450376000  | 1.789242000  | C  | -7.211017000  | 3.683275000  | -3.256436000 |
| C | -6.358003000  | -1.308000000 | 0.617416000  | H  | -7.716890000  | 2.773118000  | -2.947195000 |
| C | -9.441872000  | -1.367272000 | 1.648076000  | C  | -6.591959000  | 3.748636000  | -4.504576000 |
| C | -7.667743000  | 2.361949000  | 1.986826000  | H  | -6.619746000  | 2.889803000  | -5.169784000 |
| C | -5.786903000  | -0.741007000 | -0.537397000 | C  | -5.929693000  | 4.908358000  | -4.921095000 |
| C | -9.001569000  | -0.292757000 | 3.788119000  | C  | -5.251227000  | 4.965772000  | -6.266328000 |
| C | -5.316780000  | 1.922038000  | 1.477797000  | H  | -4.173092000  | 5.097080000  | -6.134862000 |
| C | -6.485210000  | -2.710514000 | 0.715606000  | H  | -5.612419000  | 5.805708000  | -6.869307000 |
| C | -10.746581000 | -1.633027000 | 2.060614000  | H  | -5.423448000  | 4.044111000  | -6.827955000 |
| C | -7.436992000  | 3.728172000  | 1.849512000  | C  | -5.968861000  | 8.311130000  | -4.822021000 |
| C | -5.385993000  | -1.563956000 | -1.587723000 | O  | -7.190019000  | 8.390617000  | -4.906276000 |
| C | -10.309420000 | -0.558389000 | 4.187236000  | C  | -5.062219000  | 9.474917000  | -5.122596000 |
| C | -5.109282000  | 3.293357000  | 1.335863000  | C  | -5.409535000  | 10.764814000 | -5.510582000 |
| C | -6.085716000  | -3.521436000 | -0.342111000 | H  | -6.452390000  | 11.023084000 | -5.651106000 |
| C | -11.181761000 | -1.230461000 | 3.325996000  | C  | -4.379355000  | 11.694346000 | -5.701307000 |
| C | -6.159393000  | 4.196386000  | 1.524808000  | H  | -4.620156000  | 12.707505000 | -6.004762000 |
| C | -5.534887000  | -2.950189000 | -1.494330000 | C  | -3.042349000  | 11.332303000 | -5.494704000 |
| H | -9.115110000  | -1.676294000 | 0.661770000  | H  | -2.228125000  | 12.035660000 | -5.622531000 |
| H | -8.662059000  | 2.006827000  | 2.232037000  | C  | -2.772147000  | 10.023897000 | -5.106801000 |
| H | -5.668567000  | 0.331987000  | -0.621773000 | C  | -1.440919000  | 9.398796000  | -4.786315000 |
| H | -8.325361000  | 0.217282000  | 4.466936000  | O  | -0.388844000  | 10.025133000 | -4.856845000 |
| H | -4.483406000  | 1.234228000  | 1.333664000  | C  | -0.464741000  | 7.345784000  | -3.958998000 |
| H | -6.899022000  | -3.162889000 | 1.611490000  | C  | 0.072229000   | 6.324863000  | -4.773045000 |
| H | -11.424609000 | -2.150887000 | 1.389644000  | C  | -0.535190000  | 5.995043000  | -6.112855000 |
| H | -8.255223000  | 4.426942000  | 1.992456000  | H  | -1.534612000  | 5.575012000  | -5.967073000 |
| H | -4.950225000  | -1.118218000 | -2.476013000 | H  | 0.076856000   | 5.264298000  | -6.647562000 |
| H | -10.643797000 | -0.249654000 | 5.172446000  | H  | -0.639623000  | 6.883197000  | -6.744567000 |

|                                 |              |              |              |   |              |              |              |
|---------------------------------|--------------|--------------|--------------|---|--------------|--------------|--------------|
| C                               | 1.180966000  | 5.613946000  | -4.301820000 | C | 0.957962000  | 0.846023000  | -2.772195000 |
| H                               | 1.606833000  | 4.830539000  | -4.922839000 | O | 1.476347000  | 0.766967000  | -3.881704000 |
| C                               | 1.739249000  | 5.893720000  | -3.054667000 | C | -0.916975000 | -0.532696000 | -3.323387000 |
| H                               | 2.594122000  | 5.324704000  | -2.701105000 | C | -1.536373000 | 0.084941000  | -4.433532000 |
| C                               | 1.190986000  | 6.898921000  | -2.258568000 | C | -1.561260000 | 1.585491000  | -4.587465000 |
| H                               | 1.620067000  | 7.113728000  | -1.283559000 | H | -1.775847000 | 2.084972000  | -3.637488000 |
| C                               | 0.085999000  | 7.640423000  | -2.691569000 | H | -2.318301000 | 1.887381000  | -5.315484000 |
| C                               | -0.496690000 | 8.720095000  | -1.812693000 | H | -0.591307000 | 1.959920000  | -4.933232000 |
| H                               | -0.276475000 | 9.716240000  | -2.212358000 | C | -2.114256000 | -0.731527000 | -5.411621000 |
| H                               | -0.081034000 | 8.663227000  | -0.803698000 | H | -2.586882000 | -0.267132000 | -6.272840000 |
| H                               | -1.586140000 | 8.636655000  | -1.740487000 | C | -2.093133000 | -2.120176000 | -5.294514000 |
| F                               | -2.966057000 | 5.737433000  | -4.032162000 | H | -2.541125000 | -2.738222000 | -6.066931000 |
| <sup>3</sup> TS <sub>2,PF</sub> |              |              |              | C | -1.511041000 | -2.713776000 | -4.175060000 |
| Ni                              | -0.725048000 | 0.610701000  | -0.550149000 | H | -1.504408000 | -3.795969000 | -4.076241000 |
| N                               | -0.687477000 | 0.979111000  | 1.327251000  | C | -0.920661000 | -1.937527000 | -3.172211000 |
| N                               | 0.911606000  | 1.534830000  | -0.520566000 | C | -0.305301000 | -2.598018000 | -1.963438000 |
| N                               | -0.230254000 | 0.265144000  | -2.363433000 | H | 0.712845000  | -2.243113000 | -1.775449000 |
| C                               | -1.578714000 | 0.501280000  | 2.331800000  | H | -0.273441000 | -3.683164000 | -2.088665000 |
| C                               | -1.365070000 | -0.786271000 | 2.872087000  | H | -0.895213000 | -2.378994000 | -1.066107000 |
| C                               | -0.229129000 | -1.655695000 | 2.390060000  | F | -2.426030000 | -0.173725000 | -0.655214000 |
| H                               | 0.741515000  | -1.174359000 | 2.553731000  | P | -4.626005000 | -0.230261000 | -1.117159000 |
| H                               | -0.224226000 | -2.611845000 | 2.919101000  | C | -5.164074000 | -1.575040000 | -0.046502000 |
| H                               | -0.302606000 | -1.862227000 | 1.317038000  | C | -5.114941000 | 1.385012000  | -0.510490000 |
| C                               | -2.217047000 | -1.229790000 | 3.890138000  | C | -5.205131000 | -0.519089000 | -2.788249000 |
| H                               | -2.055136000 | -2.213238000 | 4.323308000  | C | -6.377883000 | -2.247623000 | -0.294148000 |
| C                               | -3.256980000 | -0.425036000 | 4.356959000  | C | -5.999331000 | 1.496182000  | 0.578157000  |
| H                               | -3.911430000 | -0.785956000 | 5.145035000  | C | -5.740964000 | 0.514130000  | -3.586070000 |
| C                               | -3.450169000 | 0.845509000  | 3.816165000  | C | -4.369381000 | -1.938602000 | 1.053518000  |
| H                               | -4.252324000 | 1.477126000  | 4.188058000  | C | -4.623468000 | 2.545949000  | -1.140284000 |
| C                               | -2.613450000 | 1.334798000  | 2.806167000  | C | -5.109503000 | -1.825836000 | -3.314157000 |
| C                               | -2.783122000 | 2.734866000  | 2.275302000  | C | -6.787159000 | -3.267573000 | 0.561818000  |
| H                               | -2.794410000 | 2.755597000  | 1.182298000  | C | -6.413722000 | 2.758762000  | 0.999071000  |
| H                               | -1.954311000 | 3.373830000  | 2.600315000  | C | -6.198940000 | 0.230648000  | -4.869160000 |
| H                               | -3.713949000 | 3.178003000  | 2.635121000  | C | -4.790703000 | -2.963142000 | 1.899777000  |
| C                               | 0.355252000  | 1.779505000  | 1.752680000  | C | -5.044939000 | 3.804693000  | -0.715671000 |
| O                               | 0.546638000  | 2.197522000  | 2.891256000  | C | -5.583236000 | -2.096316000 | -4.593581000 |
| C                               | 1.300981000  | 2.084349000  | 0.626426000  | C | -5.994951000 | -3.627126000 | 1.656002000  |
| C                               | 2.494730000  | 2.797278000  | 0.680191000  | C | -5.944179000 | 3.904986000  | 0.352406000  |
| H                               | 2.814832000  | 3.239403000  | 1.616160000  | C | -6.127504000 | -1.071619000 | -5.373485000 |
| C                               | 3.249030000  | 2.906645000  | -0.494576000 | H | -6.997860000 | -1.973860000 | -1.140250000 |
| H                               | 4.184799000  | 3.455028000  | -0.483830000 | H | -6.372598000 | 0.608439000  | 1.076254000  |
| C                               | 2.810845000  | 2.303830000  | -1.679719000 | H | -5.828688000 | 1.522498000  | -3.200075000 |
| H                               | 3.378368000  | 2.359022000  | -2.600989000 | H | -3.428189000 | -1.432938000 | 1.230697000  |
| C                               | 1.606626000  | 1.607287000  | -1.652383000 | H | -3.914478000 | 2.468361000  | -1.958965000 |

|    |              |              |              |                                  |              |              |              |
|----|--------------|--------------|--------------|----------------------------------|--------------|--------------|--------------|
| H  | -4.675794000 | -2.624680000 | -2.722791000 | C                                | -0.255128000 | 6.838519000  | -1.176304000 |
| H  | -7.725093000 | -3.780190000 | 0.373450000  | C                                | 0.457949000  | 6.907660000  | -2.504406000 |
| H  | -7.107044000 | 2.844232000  | 1.829919000  | H                                | -0.236074000 | 6.747401000  | -3.336809000 |
| H  | -6.623587000 | 1.027772000  | -5.470648000 | H                                | 1.249036000  | 6.154973000  | -2.563209000 |
| H  | -4.173227000 | -3.241637000 | 2.746935000  | H                                | 0.908285000  | 7.894881000  | -2.655217000 |
| H  | -4.672780000 | 4.699935000  | -1.210185000 | C                                | 0.267754000  | 6.055097000  | -0.139587000 |
| H  | -5.520689000 | -3.106157000 | -4.985358000 | H                                | 1.191668000  | 5.507789000  | -0.309238000 |
| H  | -6.316688000 | -4.426278000 | 2.316726000  | C                                | -0.377131000 | 5.965353000  | 1.093334000  |
| H  | -6.274795000 | 4.884289000  | 0.685463000  | H                                | 0.040869000  | 5.350473000  | 1.886055000  |
| H  | -6.493318000 | -1.286676000 | -6.372588000 | C                                | -1.566936000 | 6.665395000  | 1.296696000  |
| Ni | -3.582839000 | 7.813589000  | -3.054657000 | H                                | -2.076723000 | 6.600367000  | 2.255097000  |
| N  | -4.962315000 | 7.639842000  | -4.416474000 | C                                | -2.122790000 | 7.458248000  | 0.285460000  |
| N  | -3.125122000 | 9.296344000  | -4.031833000 | C                                | -3.424476000 | 8.184687000  | 0.510159000  |
| N  | -2.028126000 | 8.323983000  | -2.003194000 | H                                | -3.336166000 | 9.254788000  | 0.293459000  |
| C  | -5.849890000 | 6.538137000  | -4.554188000 | H                                | -3.766531000 | 8.069199000  | 1.542748000  |
| C  | -6.900023000 | 6.371378000  | -3.624171000 | H                                | -4.177952000 | 7.773792000  | -0.167960000 |
| C  | -7.088225000 | 7.357493000  | -2.499627000 | F                                | -4.090299000 | 6.412767000  | -2.028362000 |
| H  | -7.197011000 | 8.382337000  | -2.871177000 | <sup>3</sup> IM1 <sub>2,PF</sub> |              |              |              |
| H  | -7.973109000 | 7.111902000  | -1.905262000 | Ni                               | -0.383044000 | 0.277632000  | -1.272315000 |
| H  | -6.203499000 | 7.333166000  | -1.857160000 | N                                | -0.180723000 | 1.192113000  | 0.450764000  |
| C  | -7.751239000 | 5.267635000  | -3.752115000 | N                                | 0.823048000  | 1.675118000  | -1.855337000 |
| H  | -8.562980000 | 5.142935000  | -3.039312000 | N                                | -0.186874000 | -0.302623000 | -3.138276000 |
| C  | -7.577031000 | 4.337261000  | -4.777327000 | C                                | -0.814853000 | 0.840113000  | 1.678791000  |
| H  | -8.251010000 | 3.489562000  | -4.867644000 | C                                | -0.366630000 | -0.303828000 | 2.375145000  |
| C  | -6.531878000 | 4.504628000  | -5.685084000 | C                                | 0.812820000  | -1.104540000 | 1.877255000  |
| H  | -6.386384000 | 3.781978000  | -6.484833000 | H                                | 1.680419000  | -0.467052000 | 1.680100000  |
| C  | -5.656183000 | 5.594123000  | -5.588671000 | H                                | 1.102716000  | -1.862517000 | 2.609898000  |
| C  | -4.526013000 | 5.745584000  | -6.576950000 | H                                | 0.584095000  | -1.622541000 | 0.937754000  |
| H  | -3.577764000 | 5.949989000  | -6.067775000 | C                                | -1.030505000 | -0.684625000 | 3.548096000  |
| H  | -4.709115000 | 6.588134000  | -7.252716000 | H                                | -0.682366000 | -1.560107000 | 4.090419000  |
| H  | -4.408030000 | 4.840027000  | -7.178522000 | C                                | -2.118445000 | 0.044092000  | 4.028474000  |
| C  | -4.969885000 | 8.613608000  | -5.358161000 | H                                | -2.621809000 | -0.262258000 | 4.941111000  |
| O  | -5.724369000 | 8.744929000  | -6.337760000 | C                                | -2.551823000 | 1.172657000  | 3.332686000  |
| C  | -3.873478000 | 9.615127000  | -5.094711000 | H                                | -3.398799000 | 1.745283000  | 3.702237000  |
| C  | -3.582502000 | 10.759082000 | -5.832192000 | C                                | -1.913450000 | 1.589667000  | 2.156998000  |
| H  | -4.192259000 | 11.006204000 | -6.693326000 | C                                | -2.395448000 | 2.817127000  | 1.425625000  |
| C  | -2.501623000 | 11.551738000 | -5.429506000 | H                                | -2.470738000 | 2.636713000  | 0.348601000  |
| H  | -2.252851000 | 12.449391000 | -5.986675000 | H                                | -1.698585000 | 3.651279000  | 1.559625000  |
| C  | -1.738254000 | 11.190417000 | -4.313415000 | H                                | -3.375921000 | 3.131185000  | 1.791410000  |
| H  | -0.892358000 | 11.778036000 | -3.976390000 | C                                | 0.609250000  | 2.311381000  | 0.423524000  |
| C  | -2.085469000 | 10.033265000 | -3.622219000 | O                                | 0.862330000  | 3.077184000  | 1.361369000  |
| C  | -1.394032000 | 9.447194000  | -2.416513000 | C                                | 1.215472000  | 2.561001000  | -0.947061000 |
| O  | -0.379539000 | 9.988490000  | -1.943404000 | C                                | 2.112440000  | 3.560966000  | -1.320285000 |
| C  | -1.456888000 | 7.550221000  | -0.956693000 | H                                | 2.450802000  | 4.292654000  | -0.596539000 |

|   |              |              |              |    |              |              |              |
|---|--------------|--------------|--------------|----|--------------|--------------|--------------|
| C | 2.556513000  | 3.575501000  | -2.650155000 | H  | -6.908483000 | -2.257491000 | -1.267160000 |
| H | 3.254361000  | 4.342416000  | -2.970653000 | H  | -6.606216000 | 0.858102000  | 1.328673000  |
| C | 2.120718000  | 2.612544000  | -3.570975000 | H  | -7.927676000 | 1.403117000  | -2.146466000 |
| H | 2.462185000  | 2.606864000  | -4.599212000 | H  | -3.864914000 | -0.314610000 | 1.131616000  |
| C | 1.226128000  | 1.643251000  | -3.120072000 | H  | -4.958566000 | 2.996541000  | -2.060947000 |
| C | 0.629802000  | 0.487652000  | -3.904902000 | H  | -5.012539000 | -1.451389000 | -3.603911000 |
| O | 0.911594000  | 0.343930000  | -5.099776000 | H  | -6.863713000 | -4.191139000 | 0.270594000  |
| C | -0.836310000 | -1.406999000 | -3.765392000 | H  | -7.076431000 | 3.015626000  | 2.440084000  |
| C | -1.905005000 | -1.189366000 | -4.664394000 | H  | -9.316903000 | 0.985508000  | -4.148652000 |
| C | -2.345256000 | 0.208063000  | -5.026026000 | H  | -3.827960000 | -2.256085000 | 2.638657000  |
| H | -2.508707000 | 0.817398000  | -4.131025000 | H  | -5.374081000 | 5.144469000  | -0.906128000 |
| H | -3.274563000 | 0.186931000  | -5.601423000 | H  | -6.410073000 | -1.840633000 | -5.598740000 |
| H | -1.581731000 | 0.715519000  | -5.625039000 | H  | -5.326462000 | -4.198469000 | 2.219833000  |
| C | -2.555155000 | -2.299719000 | -5.218504000 | H  | -6.455654000 | 5.148025000  | 1.332982000  |
| H | -3.371659000 | -2.136250000 | -5.917709000 | H  | -8.560444000 | -0.630486000 | -5.875197000 |
| C | -2.167344000 | -3.599927000 | -4.894707000 | Ni | -3.323838000 | 7.659736000  | -2.528152000 |
| H | -2.682276000 | -4.449469000 | -5.334263000 | N  | -4.037574000 | 7.130334000  | -4.259332000 |
| C | -1.112072000 | -3.801189000 | -4.006828000 | N  | -2.101645000 | 8.555660000  | -3.562684000 |
| H | -0.800080000 | -4.811824000 | -3.755579000 | N  | -2.226356000 | 8.340389000  | -1.070982000 |
| C | -0.433734000 | -2.718699000 | -3.432275000 | C  | -5.074739000 | 6.180603000  | -4.464206000 |
| C | 0.713004000  | -2.963109000 | -2.480423000 | C  | -6.407397000 | 6.527196000  | -4.149747000 |
| H | 1.597027000  | -2.378318000 | -2.752601000 | C  | -6.733465000 | 7.895144000  | -3.606929000 |
| H | 0.989334000  | -4.020931000 | -2.471829000 | H  | -6.362317000 | 8.691818000  | -4.260605000 |
| H | 0.454348000  | -2.682110000 | -1.451815000 | H  | -7.812989000 | 8.023401000  | -3.485622000 |
| F | -3.898046000 | 0.388428000  | -1.804508000 | H  | -6.244233000 | 8.012386000  | -2.635706000 |
| P | -5.399122000 | 0.248844000  | -1.270089000 | C  | -7.416572000 | 5.573270000  | -4.326725000 |
| C | -5.389912000 | -1.159260000 | -0.175113000 | H  | -8.443283000 | 5.842855000  | -4.090437000 |
| C | -5.748933000 | 1.784807000  | -0.437054000 | C  | -7.124629000 | 4.293505000  | -4.798245000 |
| C | -6.386112000 | -0.003719000 | -2.736447000 | H  | -7.918032000 | 3.562974000  | -4.928918000 |
| C | -6.236684000 | -2.254987000 | -0.416360000 | C  | -5.804761000 | 3.955757000  | -5.095521000 |
| C | -6.348409000 | 1.788207000  | 0.834801000  | H  | -5.568962000 | 2.958361000  | -5.459218000 |
| C | -7.597866000 | 0.690186000  | -2.894025000 | C  | -4.766477000 | 4.883269000  | -4.935346000 |
| C | -4.519707000 | -1.157456000 | 0.933277000  | C  | -3.346318000 | 4.493695000  | -5.264686000 |
| C | -5.415948000 | 2.995963000  | -1.076168000 | H  | -2.658414000 | 4.779228000  | -4.461361000 |
| C | -5.954214000 | -0.922777000 | -3.712107000 | H  | -3.003125000 | 5.005375000  | -6.170583000 |
| C | -6.209834000 | -3.344780000 | 0.452125000  | H  | -3.263326000 | 3.415182000  | -5.425331000 |
| C | -6.610242000 | 3.005969000  | 1.460372000  | C  | -3.386330000 | 7.637619000  | -5.333106000 |
| C | -8.378506000 | 0.455342000  | -4.025105000 | O  | -3.616948000 | 7.456212000  | -6.541380000 |
| C | -4.500642000 | -2.256184000 | 1.787599000  | C  | -2.242441000 | 8.516436000  | -4.893224000 |
| C | -5.662878000 | 4.206961000  | -0.433416000 | C  | -1.363964000 | 9.225929000  | -5.706886000 |
| C | -6.740917000 | -1.138911000 | -4.840365000 | H  | -1.484214000 | 9.184408000  | -6.783066000 |
| C | -5.344017000 | -3.345979000 | 1.548040000  | C  | -0.348480000 | 9.971051000  | -5.096682000 |
| C | -6.262439000 | 4.204217000  | 0.831782000  | H  | 0.350185000  | 10.534050000 | -5.707414000 |
| C | -7.950740000 | -0.454391000 | -4.994591000 | C  | -0.227932000 | 9.990786000  | -3.702526000 |

|                       |              |              |              |   |               |              |              |
|-----------------------|--------------|--------------|--------------|---|---------------|--------------|--------------|
| H                     | 0.548687000  | 10.552619000 | -3.197054000 | C | 5.437421000   | -1.614751000 | -3.583611000 |
| C                     | -1.141026000 | 9.257842000  | -2.949906000 | O | 6.558081000   | -1.317559000 | -3.149130000 |
| C                     | -1.182535000 | 9.117052000  | -1.448866000 | C | 4.990941000   | -1.181123000 | -4.961302000 |
| O                     | -0.324739000 | 9.669438000  | -0.738365000 | C | 5.710733000   | -0.456038000 | -5.905293000 |
| C                     | -2.353491000 | 7.979653000  | 0.298471000  | H | 6.726204000   | -0.151415000 | -5.680957000 |
| C                     | -1.419131000 | 7.096940000  | 0.888340000  | C | 5.086777000   | -0.142339000 | -7.118791000 |
| C                     | -0.264968000 | 6.536009000  | 0.093918000  | H | 5.627335000   | 0.421948000  | -7.871649000 |
| H                     | -0.591790000 | 6.207264000  | -0.898521000 | C | 3.769162000   | -0.545554000 | -7.367045000 |
| H                     | 0.189274000  | 5.684419000  | 0.607840000  | H | 3.257128000   | -0.310885000 | -8.292813000 |
| H                     | 0.505111000  | 7.299033000  | -0.067227000 | C | 3.103497000   | -1.268447000 | -6.382632000 |
| C                     | -1.580124000 | 6.740146000  | 2.233973000  | C | 1.683459000   | -1.787624000 | -6.407587000 |
| H                     | -0.859467000 | 6.064235000  | 2.688297000  | O | 0.935507000   | -1.569333000 | -7.369745000 |
| C                     | -2.643337000 | 7.234058000  | 2.988463000  | C | 0.127097000   | -2.981820000 | -4.982508000 |
| H                     | -2.754204000 | 6.948400000  | 4.031043000  | C | -0.916879000  | -2.104515000 | -4.607529000 |
| C                     | -3.566680000 | 8.093639000  | 2.393021000  | C | -0.698551000  | -0.611695000 | -4.578003000 |
| H                     | -4.400352000 | 8.480544000  | 2.974436000  | H | 0.201446000   | -0.350516000 | -4.010587000 |
| C                     | -3.440894000 | 8.474764000  | 1.051818000  | H | -1.551848000  | -0.099807000 | -4.125652000 |
| C                     | -4.463517000 | 9.381616000  | 0.415316000  | H | -0.558172000  | -0.218054000 | -5.591102000 |
| H                     | -3.997165000 | 10.253327000 | -0.056340000 | C | -2.160442000  | -2.648304000 | -4.266396000 |
| H                     | -5.188497000 | 9.736078000  | 1.153843000  | H | -2.976570000  | -1.998000000 | -3.966402000 |
| H                     | -4.988189000 | 8.826284000  | -0.367490000 | C | -2.371657000  | -4.026842000 | -4.288915000 |
| F                     | -4.595376000 | 6.872956000  | -1.507790000 | H | -3.344799000  | -4.418699000 | -4.008996000 |
| 'IM1' <sub>2,PF</sub> |              |              |              | C | -1.336157000  | -4.883117000 | -4.662857000 |
| Ni                    | 2.835630000  | -2.500598000 | -3.983979000 | H | -1.500678000  | -5.957538000 | -4.687700000 |
| N                     | 4.451461000  | -2.322481000 | -2.978356000 | C | -0.077493000  | -4.379751000 | -5.012441000 |
| N                     | 3.736549000  | -1.554885000 | -5.238955000 | C | 1.031038000   | -5.315687000 | -5.433001000 |
| N                     | 1.422136000  | -2.469254000 | -5.265479000 | H | 1.428859000   | -5.047895000 | -6.417639000 |
| C                     | 4.581508000  | -2.775084000 | -1.637849000 | H | 0.670743000   | -6.346888000 | -5.478241000 |
| C                     | 4.713100000  | -4.160424000 | -1.391124000 | H | 1.876891000   | -5.287381000 | -4.736511000 |
| C                     | 4.798170000  | -5.148849000 | -2.530214000 | F | -7.189439000  | 5.930609000  | 1.950349000  |
| H                     | 5.540234000  | -4.841395000 | -3.273583000 | P | -7.923981000  | 4.783567000  | 1.122074000  |
| H                     | 5.070367000  | -6.141243000 | -2.160997000 | C | -7.430932000  | 5.100797000  | -0.572625000 |
| H                     | 3.842758000  | -5.244773000 | -3.059810000 | C | -7.317522000  | 3.273226000  | 1.876141000  |
| C                     | 4.780456000  | -4.604741000 | -0.065405000 | C | -9.671233000  | 5.032535000  | 1.383930000  |
| H                     | 4.888726000  | -5.668475000 | 0.130321000  | C | -7.826627000  | 4.244535000  | -1.616474000 |
| C                     | 4.717720000  | -3.704869000 | 0.998078000  | C | -7.517675000  | 2.028682000  | 1.252629000  |
| H                     | 4.770461000  | -4.065742000 | 2.021384000  | C | -10.287648000 | 4.483260000  | 2.524070000  |
| C                     | 4.587714000  | -2.339857000 | 0.743140000  | C | -6.672176000  | 6.255949000  | -0.836836000 |
| H                     | 4.537446000  | -1.636407000 | 1.570407000  | C | -6.690702000  | 3.358062000  | 3.133177000  |
| C                     | 4.514761000  | -1.853379000 | -0.567181000 | C | -10.399751000 | 5.857069000  | 0.506313000  |
| C                     | 4.372169000  | -0.374282000 | -0.827349000 | C | -7.461138000  | 4.566979000  | -2.923047000 |
| H                     | 3.544864000  | -0.167876000 | -1.515003000 | C | -7.092728000  | 0.874450000  | 1.910251000  |
| H                     | 5.278816000  | 0.028575000  | -1.292000000 | C | -11.622978000 | 4.775054000  | 2.787743000  |
| H                     | 4.191870000  | 0.170300000  | 0.103084000  | C | -6.317308000  | 6.557104000  | -2.150285000 |

|    |               |              |              |                                 |               |              |              |
|----|---------------|--------------|--------------|---------------------------------|---------------|--------------|--------------|
| C  | -6.268382000  | 2.191317000  | 3.767940000  | C                               | -9.889317000  | -4.396322000 | -1.841725000 |
| C  | -11.736163000 | 6.136182000  | 0.780417000  | H                               | -10.838102000 | -4.874958000 | -1.629603000 |
| C  | -6.714956000  | 5.716980000  | -3.191948000 | C                               | -8.764885000  | -5.116700000 | -2.259363000 |
| C  | -6.473327000  | 0.950930000  | 3.160171000  | H                               | -8.826562000  | -6.193483000 | -2.380597000 |
| C  | -12.343739000 | 5.600506000  | 1.919600000  | C                               | -7.560853000  | -4.453653000 | -2.521203000 |
| H  | -8.385665000  | 3.329022000  | -1.444776000 | H                               | -6.670491000  | -4.978825000 | -2.845914000 |
| H  | -7.978677000  | 1.924471000  | 0.271754000  | C                               | -7.517064000  | -3.072554000 | -2.354362000 |
| H  | -9.731132000  | 3.838727000  | 3.195984000  | C                               | -6.333468000  | -2.167523000 | -2.571789000 |
| H  | -6.365576000  | 6.911835000  | -0.030804000 | O                               | -5.244036000  | -2.636793000 | -2.949806000 |
| H  | -6.531012000  | 4.318961000  | 3.608388000  | C                               | -5.637245000  | 0.107574000  | -2.401285000 |
| H  | -9.928521000  | 6.275632000  | -0.376221000 | C                               | -4.574718000  | 0.132865000  | -1.468724000 |
| H  | -7.761323000  | 3.911282000  | -3.733045000 | C                               | -4.473656000  | -0.897662000 | -0.371636000 |
| H  | -7.249180000  | -0.088877000 | 1.435849000  | H                               | -5.435611000  | -1.046518000 | 0.128374000  |
| H  | -12.101364000 | 4.356032000  | 3.666584000  | H                               | -3.735749000  | -0.600320000 | 0.378547000  |
| H  | -5.733267000  | 7.448174000  | -2.355770000 | H                               | -4.178678000  | -1.869677000 | -0.781735000 |
| H  | -5.781774000  | 2.254826000  | 4.735673000  | C                               | -3.593577000  | 1.126354000  | -1.586947000 |
| H  | -12.301936000 | 6.770398000  | 0.106229000  | H                               | -2.777755000  | 1.148224000  | -0.868263000 |
| H  | -6.440725000  | 5.956619000  | -4.214647000 | C                               | -3.649537000  | 2.078057000  | -2.604265000 |
| H  | -6.147721000  | 0.043743000  | 3.659668000  | H                               | -2.881051000  | 2.842268000  | -2.682048000 |
| H  | -13.385194000 | 5.823467000  | 2.129489000  | C                               | -4.703085000  | 2.044695000  | -3.518181000 |
| Ni | -8.512180000  | -0.585756000 | -1.762874000 | H                               | -4.752067000  | 2.781856000  | -4.315730000 |
| N  | -10.376113000 | -0.785857000 | -1.249601000 | C                               | -5.705009000  | 1.071285000  | -3.431659000 |
| N  | -8.608771000  | -2.410451000 | -1.953736000 | C                               | -6.842450000  | 1.055699000  | -4.421184000 |
| N  | -6.656190000  | -0.879970000 | -2.304543000 | H                               | -6.949875000  | 0.077446000  | -4.901730000 |
| C  | -11.245478000 | 0.259808000  | -0.834393000 | H                               | -6.693455000  | 1.806802000  | -5.202326000 |
| C  | -11.705652000 | 1.194639000  | -1.787582000 | H                               | -7.780960000  | 1.264555000  | -3.898859000 |
| C  | -11.277313000 | 1.095279000  | -3.229870000 | F                               | -8.440207000  | 1.229169000  | -1.592070000 |
| H  | -11.490860000 | 0.106688000  | -3.650226000 | <sup>1</sup> TS <sub>2,PF</sub> |               |              |              |
| H  | -11.784527000 | 1.846354000  | -3.842232000 | Ni                              | 2.171299000   | -2.652211000 | -4.079977000 |
| H  | -10.196947000 | 1.250816000  | -3.301765000 | N                               | 3.972993000   | -3.093838000 | -3.620774000 |
| C  | -12.562220000 | 2.220845000  | -1.372124000 | N                               | 2.878785000   | -1.049581000 | -4.537353000 |
| H  | -12.922913000 | 2.936492000  | -2.107196000 | N                               | 0.525377000   | -1.854392000 | -4.619805000 |
| C  | -12.960949000 | 2.330917000  | -0.040321000 | C                               | 4.337756000   | -4.316103000 | -2.995013000 |
| H  | -13.626428000 | 3.132350000  | 0.267081000  | C                               | 4.331428000   | -5.506583000 | -3.757066000 |
| C  | -12.491788000 | 1.410493000  | 0.895687000  | C                               | 4.015283000   | -5.485644000 | -5.234083000 |
| H  | -12.791820000 | 1.495980000  | 1.937326000  | H                               | 4.564421000   | -4.693655000 | -5.751943000 |
| C  | -11.632669000 | 0.369938000  | 0.520167000  | H                               | 4.269619000   | -6.442965000 | -5.696893000 |
| C  | -11.137365000 | -0.613289000 | 1.552151000  | H                               | 2.949116000   | -5.305524000 | -5.419185000 |
| H  | -10.049035000 | -0.728230000 | 1.503682000  | C                               | 4.637275000   | -6.715494000 | -3.121009000 |
| H  | -11.570049000 | -1.605321000 | 1.383605000  | H                               | 4.641780000   | -7.632607000 | -3.704514000 |
| H  | -11.404495000 | -0.287814000 | 2.561403000  | C                               | 4.940439000   | -6.755431000 | -1.760590000 |
| C  | -10.849218000 | -2.055383000 | -1.263522000 | H                               | 5.175260000   | -7.701812000 | -1.281654000 |
| O  | -11.988245000 | -2.465699000 | -0.981641000 | C                               | 4.940784000   | -5.575448000 | -1.017192000 |
| C  | -9.773753000  | -3.017032000 | -1.697067000 | H                               | 5.173650000   | -5.603898000 | 0.044277000  |



|   |               |              |              |    |               |              |              |
|---|---------------|--------------|--------------|----|---------------|--------------|--------------|
| C | 4.638804000   | -4.345436000 | -1.612771000 | C  | -10.531339000 | 4.734758000  | -1.363751000 |
| C | 4.637241000   | -3.080347000 | -0.791094000 | C  | -7.405972000  | 3.593985000  | -4.219438000 |
| H | 3.714643000   | -2.508957000 | -0.940320000 | C  | -7.417144000  | 2.208550000  | 3.201676000  |
| H | 5.466061000   | -2.425583000 | -1.081472000 | C  | -11.826574000 | 4.749067000  | 1.116983000  |
| H | 4.734395000   | -3.306839000 | 0.273816000  | C  | -5.928852000  | 5.393004000  | -3.564373000 |
| C | 4.878996000   | -2.101747000 | -3.810609000 | C  | -5.812102000  | 4.018151000  | 3.162556000  |
| O | 6.093760000   | -2.104436000 | -3.571368000 | C  | -11.887837000 | 5.043848000  | -1.283866000 |
| C | 4.197374000   | -0.881207000 | -4.385977000 | C  | -6.453147000  | 4.559119000  | -4.553047000 |
| C | 4.772068000   | 0.337844000  | -4.730662000 | C  | -6.394718000  | 2.932689000  | 3.819468000  |
| H | 5.839567000   | 0.477134000  | -4.607078000 | C  | -12.534764000 | 5.054978000  | -0.046862000 |
| C | 3.938818000   | 1.348906000  | -5.224453000 | H  | -8.546848000  | 2.686682000  | -2.626832000 |
| H | 4.363402000   | 2.308669000  | -5.500178000 | H  | -8.640569000  | 1.998243000  | 1.438156000  |
| C | 2.561840000   | 1.134401000  | -5.360102000 | H  | -9.928117000  | 4.222253000  | 1.963321000  |
| H | 1.890810000   | 1.899930000  | -5.731631000 | H  | -5.983183000  | 5.962606000  | -1.498685000 |
| C | 2.048759000   | -0.106950000 | -4.998698000 | H  | -5.831886000  | 5.269581000  | 1.421150000  |
| C | 0.608339000   | -0.566032000 | -5.033369000 | H  | -10.036374000 | 4.751605000  | -2.327152000 |
| O | -0.299368000  | 0.193623000  | -5.396295000 | H  | -7.813089000  | 2.941129000  | -4.984814000 |
| C | -0.725180000  | -2.514379000 | -4.473302000 | H  | -7.870751000  | 1.362141000  | 3.707484000  |
| C | -1.573439000  | -2.194869000 | -3.388146000 | H  | -12.325840000 | 4.759379000  | 2.080385000  |
| C | -1.214552000  | -1.097458000 | -2.416091000 | H  | -5.185352000  | 6.142347000  | -3.816342000 |
| H | -0.215551000  | -1.250431000 | -1.991866000 | H  | -5.014198000  | 4.581052000  | 3.636047000  |
| H | -1.941959000  | -1.053049000 | -1.602553000 | H  | -12.435630000 | 5.281614000  | -2.189714000 |
| H | -1.198762000  | -0.124033000 | -2.918793000 | H  | -6.120259000  | 4.661137000  | -5.581511000 |
| C | -2.763815000  | -2.915626000 | -3.228207000 | H  | -6.051873000  | 2.650490000  | 4.810189000  |
| H | -3.407685000  | -2.678736000 | -2.384901000 | H  | -13.589740000 | 5.304220000  | 0.010563000  |
| C | -3.111275000  | -3.929753000 | -4.121320000 | Ni | -7.898455000  | 0.003654000  | -0.509521000 |
| H | -4.036413000  | -4.482964000 | -3.983754000 | N  | -9.782218000  | -0.511228000 | -0.428478000 |
| C | -2.269667000  | -4.233643000 | -5.191361000 | N  | -7.653105000  | -1.768403000 | -0.048642000 |
| H | -2.543910000  | -5.018429000 | -5.891907000 | N  | -5.915365000  | -0.045561000 | -0.622951000 |
| C | -1.069494000  | -3.539450000 | -5.383466000 | C  | -10.912412000 | 0.252164000  | -0.837723000 |
| C | -0.173655000  | -3.874833000 | -6.552591000 | C  | -11.125965000 | 0.471004000  | -2.216860000 |
| H | 0.097086000   | -2.979280000 | -7.120865000 | C  | -10.166966000 | -0.077327000 | -3.245482000 |
| H | -0.668649000  | -4.575783000 | -7.230075000 | H  | -10.077569000 | -1.166764000 | -3.169425000 |
| H | 0.766238000   | -4.336848000 | -6.227837000 | H  | -10.500302000 | 0.166894000  | -4.257917000 |
| F | -7.672980000  | 5.910304000  | 0.076222000  | H  | -9.158761000  | 0.327227000  | -3.109816000 |
| P | -8.020986000  | 4.359026000  | -0.234981000 | C  | -12.268816000 | 1.169717000  | -2.623873000 |
| C | -7.329643000  | 4.309891000  | -1.911216000 | H  | -12.438225000 | 1.332534000  | -3.685511000 |
| C | -7.297457000  | 3.674095000  | 1.280519000  | C  | -13.194092000 | 1.637304000  | -1.691514000 |
| C | -9.816089000  | 4.422556000  | -0.194943000 | H  | -14.080072000 | 2.172405000  | -2.021662000 |
| C | -7.837502000  | 3.453621000  | -2.901971000 | C  | -12.974069000 | 1.416195000  | -0.333186000 |
| C | -7.863744000  | 2.565746000  | 1.930089000  | H  | -13.691558000 | 1.780193000  | 0.397795000  |
| C | -10.470439000 | 4.436540000  | 1.050218000  | C  | -11.839054000 | 0.728573000  | 0.114430000  |
| C | -6.370175000  | 5.282532000  | -2.246702000 | C  | -11.639257000 | 0.474209000  | 1.588187000  |
| C | -6.265119000  | 4.400320000  | 1.900388000  | H  | -10.618179000 | 0.709974000  | 1.904749000  |

|                                  |               |              |              |   |              |              |              |
|----------------------------------|---------------|--------------|--------------|---|--------------|--------------|--------------|
| H                                | -11.806071000 | -0.583365000 | 1.820709000  | H | 4.599501000  | -5.253228000 | 0.491445000  |
| H                                | -12.332626000 | 1.071775000  | 2.186286000  | C | 4.488342000  | -3.227783000 | 1.215107000  |
| C                                | -10.020498000 | -1.786245000 | -0.033606000 | H | 4.515240000  | -3.516248000 | 2.262117000  |
| O                                | -11.110566000 | -2.367784000 | 0.096258000  | C | 4.411048000  | -1.880718000 | 0.862127000  |
| C                                | -8.731948000  | -2.513248000 | 0.221067000  | H | 4.376164000  | -1.118709000 | 1.636636000  |
| C                                | -8.591071000  | -3.829040000 | 0.650416000  | C | 4.371338000  | -1.486781000 | -0.480348000 |
| H                                | -9.478952000  | -4.415083000 | 0.856158000  | C | 4.285213000  | -0.026047000 | -0.847204000 |
| C                                | -7.300195000  | -4.346658000 | 0.796291000  | H | 3.469980000  | 0.160467000  | -1.554715000 |
| H                                | -7.160068000  | -5.369691000 | 1.130306000  | H | 5.208706000  | 0.309014000  | -1.332028000 |
| C                                | -6.190241000  | -3.546698000 | 0.508365000  | H | 4.119947000  | 0.590343000  | 0.040210000  |
| H                                | -5.173100000  | -3.907861000 | 0.602423000  | C | 5.334530000  | -1.498591000 | -3.494797000 |
| C                                | -6.408616000  | -2.239318000 | 0.084110000  | O | 6.462347000  | -1.215005000 | -3.069879000 |
| C                                | -5.361111000  | -1.234141000 | -0.292332000 | C | 4.914663000  | -1.143401000 | -4.903202000 |
| O                                | -4.157839000  | -1.561015000 | -0.293381000 | C | 5.667394000  | -0.511018000 | -5.887317000 |
| C                                | -5.009441000  | 0.954699000  | -1.088219000 | H | 6.692527000  | -0.230798000 | -5.675513000 |
| C                                | -4.174708000  | 1.641199000  | -0.179612000 | C | 5.062919000  | -0.254951000 | -7.124037000 |
| C                                | -4.185423000  | 1.300869000  | 1.288766000  | H | 5.629265000  | 0.237014000  | -7.908024000 |
| H                                | -5.202382000  | 1.241220000  | 1.683163000  | C | 3.732050000  | -0.622792000 | -7.355921000 |
| H                                | -3.632443000  | 2.044187000  | 1.868487000  | H | 3.234541000  | -0.430593000 | -8.299235000 |
| H                                | -3.720332000  | 0.321901000  | 1.451223000  | C | 3.033232000  | -1.252446000 | -6.331275000 |
| C                                | -3.287958000  | 2.607087000  | -0.672680000 | C | 1.593922000  | -1.716360000 | -6.333521000 |
| H                                | -2.647866000  | 3.140096000  | 0.026449000  | O | 0.861899000  | -1.536699000 | -7.315639000 |
| C                                | -3.204170000  | 2.877444000  | -2.037696000 | C | -0.016132000 | -2.752143000 | -4.844221000 |
| H                                | -2.510085000  | 3.628372000  | -2.405136000 | C | -1.030221000 | -1.814751000 | -4.538977000 |
| C                                | -4.009343000  | 2.170073000  | -2.929784000 | C | -0.759347000 | -0.332060000 | -4.611080000 |
| H                                | -3.935880000  | 2.363027000  | -3.996654000 | H | 0.147057000  | -0.064020000 | -4.057227000 |
| C                                | -4.913659000  | 1.202965000  | -2.474782000 | H | -1.596046000 | 0.239085000  | -4.200634000 |
| C                                | -5.730401000  | 0.402414000  | -3.459455000 | H | -0.601006000 | -0.014300000 | -5.647882000 |
| H                                | -5.467403000  | -0.661183000 | -3.419768000 | C | -2.293694000 | -2.289439000 | -4.168854000 |
| H                                | -5.562179000  | 0.753696000  | -4.480988000 | H | -3.086120000 | -1.590439000 | -3.918874000 |
| H                                | -6.801024000  | 0.471073000  | -3.246111000 | C | -2.553950000 | -3.657868000 | -4.097597000 |
| F                                | -8.237681000  | 1.825380000  | -0.739652000 | H | -3.541123000 | -3.995641000 | -3.797302000 |
| <sup>1</sup> IM2 <sub>2,PF</sub> |               |              |              | C | -1.548144000 | -4.573798000 | -4.404953000 |
| Ni                               | 2.702700000   | -2.307087000 | -3.857369000 | H | -1.750994000 | -5.640846000 | -4.357075000 |
| N                                | 4.317368000   | -2.124685000 | -2.852444000 | C | -0.270463000 | -4.140773000 | -4.778848000 |
| N                                | 3.648285000   | -1.486517000 | -5.166106000 | C | 0.806384000  | -5.143209000 | -5.121413000 |
| N                                | 1.298414000   | -2.306552000 | -5.149590000 | H | 1.240252000  | -4.944408000 | -6.106934000 |
| C                                | 4.417486000   | -2.484452000 | -1.481630000 | H | 0.402616000  | -6.159199000 | -5.123073000 |
| C                                | 4.496993000   | -3.852279000 | -1.135400000 | H | 1.634446000  | -5.115350000 | -4.403499000 |
| C                                | 4.562296000   | -4.920736000 | -2.200984000 | F | -6.914540000 | 4.376381000  | 1.327512000  |
| H                                | 5.341265000   | -4.703963000 | -2.938825000 | P | -7.695927000 | 3.176450000  | 0.474921000  |
| H                                | 4.770772000   | -5.897619000 | -1.756705000 | C | -7.269783000 | 3.961549000  | -1.123345000 |
| H                                | 3.619424000   | -5.003176000 | -2.754301000 | C | -6.840516000 | 1.873478000  | 1.437050000  |
| C                                | 4.532047000   | -4.203033000 | 0.219228000  | C | -9.323847000 | 3.646116000  | 1.139882000  |

|    |               |              |              |                                   |               |              |              |
|----|---------------|--------------|--------------|-----------------------------------|---------------|--------------|--------------|
| C  | -8.141574000  | 3.878938000  | -2.221405000 | C                                 | -13.117894000 | 1.925767000  | 0.455742000  |
| C  | -7.485545000  | 0.665035000  | 1.746605000  | H                                 | -13.623154000 | 2.061556000  | 1.408213000  |
| C  | -9.710201000  | 3.189997000  | 2.408821000  | C                                 | -12.117478000 | 0.951819000  | 0.352074000  |
| C  | -6.145061000  | 4.799430000  | -1.200068000 | C                                 | -11.784560000 | 0.081783000  | 1.538546000  |
| C  | -5.593248000  | 2.153517000  | 2.019414000  | H                                 | -10.705494000 | 0.021225000  | 1.708829000  |
| C  | -10.081604000 | 4.637587000  | 0.500420000  | H                                 | -12.139641000 | -0.941375000 | 1.374086000  |
| C  | -7.901221000  | 4.639827000  | -3.365106000 | H                                 | -12.252592000 | 0.467137000  | 2.448131000  |
| C  | -6.899905000  | -0.236940000 | 2.636004000  | C                                 | -10.965307000 | -1.520569000 | -1.141343000 |
| C  | -10.850019000 | 3.711744000  | 3.021385000  | O                                 | -12.130130000 | -1.921725000 | -0.997994000 |
| C  | -5.894065000  | 5.530531000  | -2.360518000 | C                                 | -9.868793000  | -2.476423000 | -1.505505000 |
| C  | -5.002006000  | 1.235429000  | 2.886979000  | C                                 | -9.986315000  | -3.853016000 | -1.665066000 |
| C  | -11.220373000 | 5.153577000  | 1.119906000  | H                                 | -10.945005000 | -4.324017000 | -1.483469000 |
| C  | -6.776105000  | 5.462795000  | -3.439871000 | C                                 | -8.857027000  | -4.575739000 | -2.061196000 |
| C  | -5.657089000  | 0.044553000  | 3.206091000  | H                                 | -8.919006000  | -5.651100000 | -2.192508000 |
| C  | -11.604772000 | 4.695703000  | 2.380928000  | C                                 | -7.649438000  | -3.911249000 | -2.294506000 |
| H  | -9.013040000  | 3.241186000  | -2.172919000 | H                                 | -6.752846000  | -4.430041000 | -2.611666000 |
| H  | -8.450747000  | 0.438686000  | 1.314444000  | C                                 | -7.605659000  | -2.532609000 | -2.113036000 |
| H  | -9.122430000  | 2.443139000  | 2.930231000  | C                                 | -6.426664000  | -1.635764000 | -2.339732000 |
| H  | -5.475320000  | 4.896510000  | -0.355939000 | O                                 | -5.367711000  | -2.098354000 | -2.797044000 |
| H  | -5.091081000  | 3.089628000  | 1.813729000  | C                                 | -5.684927000  | 0.598695000  | -2.288457000 |
| H  | -9.785147000  | 5.019940000  | -0.469554000 | C                                 | -4.544213000  | 0.672492000  | -1.459107000 |
| H  | -8.595227000  | 4.584275000  | -4.197949000 | C                                 | -4.351535000  | -0.285526000 | -0.311764000 |
| H  | -7.420138000  | -1.157386000 | 2.881929000  | H                                 | -5.264121000  | -0.409599000 | 0.274180000  |
| H  | -11.139938000 | 3.352804000  | 4.004124000  | H                                 | -3.554559000  | 0.054341000  | 0.353905000  |
| H  | -5.015138000  | 6.165624000  | -2.411440000 | H                                 | -4.079455000  | -1.275147000 | -0.696383000 |
| H  | -4.034101000  | 1.460708000  | 3.323763000  | C                                 | -3.544163000  | 1.603544000  | -1.769726000 |
| H  | -11.800929000 | 5.920052000  | 0.616058000  | H                                 | -2.668077000  | 1.668227000  | -1.128939000 |
| H  | -6.589736000  | 6.050735000  | -4.333626000 | C                                 | -3.647984000  | 2.425220000  | -2.891077000 |
| H  | -5.202729000  | -0.659357000 | 3.896705000  | H                                 | -2.863688000  | 3.142117000  | -3.117960000 |
| H  | -12.486593000 | 5.105980000  | 2.863624000  | C                                 | -4.758264000  | 2.312313000  | -3.727313000 |
| Ni | -8.568465000  | -0.063098000 | -1.377111000 | H                                 | -4.832266000  | 2.931939000  | -4.616775000 |
| N  | -10.489860000 | -0.251614000 | -1.054122000 | C                                 | -5.783456000  | 1.402860000  | -3.445408000 |
| N  | -8.700092000  | -1.866175000 | -1.732025000 | C                                 | -6.937016000  | 1.239188000  | -4.404731000 |
| N  | -6.716615000  | -0.351465000 | -2.015861000 | H                                 | -6.981817000  | 0.217465000  | -4.798643000 |
| C  | -11.466121000 | 0.775870000  | -0.888236000 | H                                 | -6.838865000  | 1.925552000  | -5.249870000 |
| C  | -11.825759000 | 1.562802000  | -2.005562000 | H                                 | -7.899578000  | 1.433891000  | -3.923689000 |
| C  | -11.200544000 | 1.329802000  | -3.360798000 | F                                 | -8.500160000  | 1.761284000  | -0.564374000 |
| H  | -11.299520000 | 0.284575000  | -3.672312000 | <sup>3</sup> IMI' <sub>2,PF</sub> |               |              |              |
| H  | -11.676323000 | 1.958195000  | -4.118488000 | Ni                                | 2.870745000   | -2.530007000 | -3.701318000 |
| H  | -10.128871000 | 1.555127000  | -3.367746000 | N                                 | 4.563153000   | -2.371482000 | -2.729711000 |
| C  | -12.822719000 | 2.534852000  | -1.856577000 | N                                 | 3.851312000   | -1.548746000 | -5.048854000 |
| H  | -13.104919000 | 3.137645000  | -2.716199000 | N                                 | 1.444684000   | -2.420498000 | -5.032850000 |
| C  | -13.469883000 | 2.717693000  | -0.635647000 | C                                 | 4.836134000   | -2.834586000 | -1.408257000 |
| H  | -14.247016000 | 3.470385000  | -0.536586000 | C                                 | 5.029967000   | -4.215683000 | -1.191164000 |

|   |              |              |              |    |               |              |              |
|---|--------------|--------------|--------------|----|---------------|--------------|--------------|
| C | 5.020390000  | -5.190844000 | -2.344235000 | F  | -7.083625000  | 5.997078000  | 1.708463000  |
| H | 5.724094000  | -4.895670000 | -3.129379000 | P  | -7.872224000  | 4.821626000  | 0.975555000  |
| H | 5.288293000  | -6.194886000 | -2.004338000 | C  | -7.582693000  | 5.138140000  | -0.765416000 |
| H | 4.032009000  | -5.251662000 | -2.816278000 | C  | -7.140881000  | 3.335564000  | 1.664075000  |
| C | 5.238214000  | -4.670306000 | 0.117031000  | C  | -9.586629000  | 5.019703000  | 1.428353000  |
| H | 5.392354000  | -5.732865000 | 0.287781000  | C  | -8.065439000  | 4.258098000  | -1.751123000 |
| C | 5.253580000  | -3.783405000 | 1.192735000  | C  | -7.404306000  | 2.075841000  | 1.096585000  |
| H | 5.415103000  | -4.151429000 | 2.202044000  | C  | -10.063656000 | 4.442274000  | 2.620177000  |
| C | 5.059167000  | -2.421302000 | 0.965591000  | C  | -6.896820000  | 6.313775000  | -1.121727000 |
| H | 5.067059000  | -1.725724000 | 1.801202000  | C  | -6.344529000  | 3.454851000  | 2.817973000  |
| C | 4.848670000  | -1.926053000 | -0.327067000 | C  | -10.426597000 | 5.830451000  | 0.642093000  |
| C | 4.635269000  | -0.449608000 | -0.554868000 | C  | -7.862138000  | 4.578847000  | -3.092965000 |
| H | 3.735437000  | -0.263209000 | -1.151544000 | C  | -6.872685000  | 0.941580000  | 1.709453000  |
| H | 5.476030000  | -0.011788000 | -1.104055000 | C  | -11.371554000 | 4.692461000  | 3.026171000  |
| H | 4.534815000  | 0.081761000  | 0.395212000  | C  | -6.703017000  | 6.612149000  | -2.469041000 |
| C | 5.551714000  | -1.695480000 | -3.395976000 | C  | -5.817973000  | 2.307420000  | 3.408410000  |
| O | 6.696518000  | -1.450565000 | -2.998933000 | C  | -11.733459000 | 6.068968000  | 1.059132000  |
| C | 5.109669000  | -1.227711000 | -4.773288000 | C  | -7.189127000  | 5.749025000  | -3.452821000 |
| C | 5.852222000  | -0.528260000 | -5.723452000 | C  | -6.086251000  | 1.052179000  | 2.858803000  |
| H | 6.880991000  | -0.254027000 | -5.522143000 | C  | -12.202397000 | 5.505160000  | 2.249150000  |
| C | 5.219936000  | -0.199778000 | -6.931217000 | H  | -8.570406000  | 3.326545000  | -1.509704000 |
| H | 5.772077000  | 0.344199000  | -7.690964000 | H  | -7.991517000  | 1.945454000  | 0.189009000  |
| C | 3.886781000  | -0.559849000 | -7.174951000 | H  | -9.421336000  | 3.808537000  | 3.222096000  |
| H | 3.386555000  | -0.310072000 | -8.103100000 | H  | -6.523069000  | 6.987613000  | -0.360078000 |
| C | 3.211227000  | -1.258031000 | -6.175178000 | H  | -6.136187000  | 4.427386000  | 3.248396000  |
| C | 1.774147000  | -1.755237000 | -6.184145000 | H  | -10.063588000 | 6.269276000  | -0.280821000 |
| O | 1.051960000  | -1.539407000 | -7.163825000 | H  | -8.230928000  | 3.905824000  | -3.859097000 |
| C | 0.110780000  | -2.906400000 | -4.885364000 | H  | -7.076963000  | -0.033368000 | 1.279711000  |
| C | -0.937874000 | -2.013720000 | -4.572031000 | H  | -11.743021000 | 4.251340000  | 3.944995000  |
| C | -0.683939000 | -0.530094000 | -4.459295000 | H  | -6.175302000  | 7.518927000  | -2.745769000 |
| H | 0.172213000  | -0.319298000 | -3.808666000 | H  | -5.201420000  | 2.397566000  | 4.296703000  |
| H | -1.558528000 | -0.012945000 | -4.055905000 | H  | -12.384616000 | 6.692780000  | 0.456068000  |
| H | -0.450514000 | -0.095917000 | -5.438046000 | H  | -7.041288000  | 5.986691000  | -4.501734000 |
| C | -2.221314000 | -2.531597000 | -4.360230000 | H  | -5.679560000  | 0.159844000  | 3.324487000  |
| H | -3.040320000 | -1.863738000 | -4.110412000 | H  | -13.221691000 | 5.695998000  | 2.570162000  |
| C | -2.470002000 | -3.900551000 | -4.455310000 | Ni | -8.683039000  | -0.589526000 | -1.872532000 |
| H | -3.474553000 | -4.272583000 | -4.278208000 | N  | -10.508276000 | -0.810920000 | -1.242075000 |
| C | -1.427429000 | -4.771504000 | -4.769323000 | N  | -8.803345000  | -2.402275000 | -2.148413000 |
| H | -1.615866000 | -5.839515000 | -4.848964000 | N  | -6.865983000  | -0.864935000 | -2.539917000 |
| C | -0.128735000 | -4.293661000 | -4.987183000 | C  | -11.333455000 | 0.211513000  | -0.698810000 |
| C | 0.989305000  | -5.250184000 | -5.328702000 | C  | -11.860784000 | 1.202349000  | -1.555670000 |
| H | 1.499795000  | -4.962059000 | -6.253729000 | C  | -11.549056000 | 1.185923000  | -3.030859000 |
| H | 0.604834000  | -6.266179000 | -5.453311000 | H  | -11.811542000 | 0.227289000  | -3.491164000 |
| H | 1.756230000  | -5.277796000 | -4.544603000 | H  | -12.090520000 | 1.978643000  | -3.555061000 |

|                                 |               |              |              |   |              |              |              |
|---------------------------------|---------------|--------------|--------------|---|--------------|--------------|--------------|
| H                               | -10.474970000 | 1.332547000  | -3.177796000 | N | 4.472690000  | -2.141152000 | -2.843687000 |
| C                               | -12.672677000 | 2.205425000  | -1.013370000 | N | 3.623923000  | -1.392282000 | -5.141072000 |
| H                               | -13.085462000 | 2.964230000  | -1.673985000 | N | 1.241538000  | -2.310821000 | -4.983762000 |
| C                               | -12.961305000 | 2.238923000  | 0.350675000  | C | 4.825179000  | -2.567453000 | -1.528381000 |
| H                               | -13.593360000 | 3.023189000  | 0.756891000  | C | 5.041804000  | -3.941348000 | -1.287285000 |
| C                               | -12.424910000 | 1.264332000  | 1.190801000  | C | 4.975637000  | -4.947402000 | -2.411773000 |
| H                               | -12.638765000 | 1.289987000  | 2.256684000  | H | 5.616629000  | -4.658934000 | -3.251042000 |
| C                               | -11.607845000 | 0.244290000  | 0.686957000  | H | 5.289271000  | -5.935813000 | -2.065182000 |
| C                               | -11.038598000 | -0.799520000 | 1.616161000  | H | 3.958796000  | -5.043546000 | -2.812271000 |
| H                               | -9.960210000  | -0.921276000 | 1.466610000  | C | 5.326831000  | -4.360581000 | 0.018255000  |
| H                               | -11.497587000 | -1.776775000 | 1.430995000  | H | 5.498686000  | -5.417380000 | 0.206944000  |
| H                               | -11.213489000 | -0.529403000 | 2.661288000  | C | 5.396279000  | -3.446184000 | 1.068427000  |
| C                               | -10.989699000 | -2.076359000 | -1.289851000 | H | 5.617111000  | -3.787004000 | 2.076054000  |
| O                               | -12.107957000 | -2.497842000 | -0.947711000 | C | 5.179619000  | -2.091644000 | 0.817792000  |
| C                               | -9.954336000  | -3.016576000 | -1.850069000 | H | 5.229737000  | -1.374564000 | 1.633532000  |
| C                               | -10.091255000 | -4.384827000 | -2.064381000 | C | 4.892945000  | -1.631148000 | -0.473061000 |
| H                               | -11.028077000 | -4.869886000 | -1.816625000 | C | 4.657461000  | -0.162020000 | -0.724869000 |
| C                               | -9.003486000  | -5.085883000 | -2.596384000 | H | 3.730214000  | 0.004111000  | -1.284310000 |
| H                               | -9.082730000  | -6.153603000 | -2.774334000 | H | 5.469256000  | 0.268045000  | -1.321712000 |
| C                               | -7.813348000  | -4.415161000 | -2.899126000 | H | 4.595956000  | 0.390704000  | 0.216306000  |
| H                               | -6.950740000  | -4.925279000 | -3.311129000 | C | 5.411204000  | -1.464264000 | -3.577999000 |
| C                               | -7.746217000  | -3.046184000 | -2.657314000 | O | 6.570260000  | -1.188365000 | -3.248581000 |
| C                               | -6.569551000  | -2.137040000 | -2.896239000 | C | 4.888650000  | -1.041574000 | -4.940877000 |
| O                               | -5.507922000  | -2.588835000 | -3.363067000 | C | 5.568464000  | -0.356066000 | -5.946512000 |
| C                               | -5.843907000  | 0.119559000  | -2.624780000 | H | 6.600878000  | -0.058771000 | -5.805823000 |
| C                               | -4.748675000  | 0.091252000  | -1.731357000 | C | 4.869511000  | -0.072333000 | -7.128466000 |
| C                               | -4.608932000  | -1.002926000 | -0.702055000 | H | 5.371786000  | 0.459909000  | -7.929987000 |
| H                               | -5.557720000  | -1.198537000 | -0.193111000 | C | 3.532928000  | -0.462859000 | -7.293023000 |
| H                               | -3.858967000  | -0.741321000 | 0.049473000  | H | 2.980899000  | -0.248492000 | -8.200458000 |
| H                               | -4.308844000  | -1.943438000 | -1.176918000 | C | 2.922839000  | -1.144651000 | -6.241249000 |
| C                               | -3.772195000  | 1.092048000  | -1.826308000 | C | 1.497209000  | -1.666532000 | -6.164220000 |
| H                               | -2.932001000  | 1.074777000  | -1.136142000 | O | 0.719986000  | -1.484503000 | -7.108262000 |
| C                               | -3.865088000  | 2.102071000  | -2.783140000 | C | -0.075359000 | -2.809634000 | -4.751577000 |
| H                               | -3.100713000  | 2.872082000  | -2.841971000 | C | -1.112902000 | -1.923562000 | -4.386769000 |
| C                               | -4.948421000  | 2.118046000  | -3.662199000 | C | -0.867321000 | -0.436102000 | -4.313645000 |
| H                               | -5.025102000  | 2.899870000  | -4.413709000 | H | 0.017562000  | -0.206024000 | -3.709448000 |
| C                               | -5.945723000  | 1.138379000  | -3.597438000 | H | -1.725455000 | 0.082748000  | -3.878687000 |
| C                               | -7.113998000  | 1.169580000  | -4.549981000 | H | -0.684835000 | -0.019615000 | -5.310812000 |
| H                               | -7.225705000  | 0.220653000  | -5.085409000 | C | -2.374980000 | -2.450970000 | -4.087352000 |
| H                               | -6.997235000  | 1.967847000  | -5.288564000 | H | -3.184186000 | -1.790326000 | -3.789673000 |
| H                               | -8.038218000  | 1.334673000  | -3.988167000 | C | -2.611868000 | -3.824042000 | -4.149575000 |
| F                               | -8.595458000  | 1.217587000  | -1.635983000 | H | -3.598096000 | -4.207390000 | -3.905067000 |
| <sup>3</sup> TS <sub>2,PF</sub> |               |              |              | C | -1.581748000 | -4.688797000 | -4.517386000 |
| Ni                              | 2.733834000   | -2.356692000 | -3.716124000 | H | -1.763129000 | -5.759619000 | -4.571370000 |

|    |               |              |              |   |               |              |              |
|----|---------------|--------------|--------------|---|---------------|--------------|--------------|
| C  | -0.304388000  | -4.200346000 | -4.820768000 | C | -11.558387000 | 0.713346000  | -0.900420000 |
| C  | 0.802420000   | -5.147856000 | -5.218753000 | C | -11.895871000 | 1.553436000  | -1.985007000 |
| H  | 1.235502000   | -4.878709000 | -6.188124000 | C | -11.249802000 | 1.370216000  | -3.336707000 |
| H  | 0.429365000   | -6.173523000 | -5.285137000 | H | -11.418490000 | 0.360866000  | -3.728328000 |
| H  | 1.627102000   | -5.137509000 | -4.495493000 | H | -11.649094000 | 2.087104000  | -4.059508000 |
| F  | -6.914104000  | 4.732129000  | 1.452431000  | H | -10.164766000 | 1.505667000  | -3.283460000 |
| P  | -7.671729000  | 3.574337000  | 0.609441000  | C | -12.875117000 | 2.537122000  | -1.802659000 |
| C  | -7.234083000  | 4.182153000  | -1.042044000 | H | -13.140861000 | 3.179065000  | -2.639081000 |
| C  | -6.948228000  | 2.166786000  | 1.494104000  | C | -13.521979000 | 2.687593000  | -0.576722000 |
| C  | -9.373651000  | 3.910273000  | 1.076671000  | H | -14.284883000 | 3.450795000  | -0.451010000 |
| C  | -8.059354000  | 3.967769000  | -2.157943000 | C | -13.181170000 | 1.854661000  | 0.487325000  |
| C  | -7.683175000  | 0.996936000  | 1.742804000  | H | -13.680465000 | 1.969326000  | 1.446073000  |
| C  | -9.834554000  | 3.471152000  | 2.330985000  | C | -12.201056000 | 0.864026000  | 0.347404000  |
| C  | -6.117047000  | 5.031082000  | -1.145782000 | C | -11.873411000 | -0.044918000 | 1.506302000  |
| C  | -5.691354000  | 2.349558000  | 2.097500000  | H | -10.792724000 | -0.151303000 | 1.644408000  |
| C  | -10.134153000 | 4.831038000  | 0.335764000  | H | -12.269874000 | -1.050547000 | 1.328201000  |
| C  | -7.781465000  | 4.624568000  | -3.355045000 | H | -12.304253000 | 0.335627000  | 2.436445000  |
| C  | -7.173311000  | 0.033654000  | 2.612496000  | C | -11.098214000 | -1.587533000 | -1.205723000 |
| C  | -11.047530000 | 3.943407000  | 2.827777000  | O | -12.268512000 | -1.979878000 | -1.064023000 |
| C  | -5.836975000  | 5.660118000  | -2.357818000 | C | -10.010382000 | -2.553715000 | -1.575720000 |
| C  | -5.183003000  | 1.367864000  | 2.947143000  | C | -10.144950000 | -3.927213000 | -1.751875000 |
| C  | -11.346702000 | 5.294392000  | 0.842808000  | H | -11.112054000 | -4.387832000 | -1.588926000 |
| C  | -6.673529000  | 5.468551000  | -3.458416000 | C | -9.019716000  | -4.661565000 | -2.138881000 |
| C  | -5.926937000  | 0.217368000  | 3.216048000  | H | -9.094804000  | -5.734573000 | -2.283177000 |
| C  | -11.802007000 | 4.855626000  | 2.087392000  | C | -7.798585000  | -4.012193000 | -2.344024000 |
| H  | -8.892389000  | 3.284621000  | -2.076839000 | H | -6.904197000  | -4.541505000 | -2.650070000 |
| H  | -8.637827000  | 0.853173000  | 1.257432000  | C | -7.738906000  | -2.635860000 | -2.147123000 |
| H  | -9.248477000  | 2.780624000  | 2.925568000  | C | -6.538829000  | -1.755175000 | -2.334236000 |
| H  | -5.481805000  | 5.221118000  | -0.290033000 | O | -5.471253000  | -2.235601000 | -2.757707000 |
| H  | -5.121657000  | 3.255456000  | 1.930583000  | C | -5.767234000  | 0.469650000  | -2.220353000 |
| H  | -9.781319000  | 5.196959000  | -0.620790000 | C | -4.666921000  | 0.519005000  | -1.336677000 |
| H  | -8.431449000  | 4.469480000  | -4.210175000 | C | -4.551697000  | -0.450349000 | -0.188134000 |
| H  | -7.753232000  | -0.860830000 | 2.816453000  | H | -5.487317000  | -0.529032000 | 0.370162000  |
| H  | -11.397503000 | 3.602213000  | 3.796609000  | H | -3.760649000  | -0.148565000 | 0.502932000  |
| H  | -4.971882000  | 6.311092000  | -2.433127000 | H | -4.317415000  | -1.452886000 | -0.563461000 |
| H  | -4.212066000  | 1.513055000  | 3.409635000  | C | -3.648156000  | 1.450453000  | -1.576722000 |
| H  | -11.930759000 | 6.003556000  | 0.265627000  | H | -2.803496000  | 1.495020000  | -0.893274000 |
| H  | -6.462662000  | 5.975974000  | -4.394923000 | C | -3.696677000  | 2.303038000  | -2.679169000 |
| H  | -5.535604000  | -0.535442000 | 3.893403000  | H | -2.899017000  | 3.020460000  | -2.851380000 |
| H  | -12.743177000 | 5.226297000  | 2.481370000  | C | -4.771912000  | 2.222976000  | -3.563782000 |
| Ni | -8.685954000  | -0.148367000 | -1.424645000 | H | -4.806924000  | 2.871918000  | -4.434631000 |
| N  | -10.608018000 | -0.327064000 | -1.105663000 | C | -5.813041000  | 1.311801000  | -3.352721000 |
| N  | -8.829915000  | -1.956197000 | -1.777542000 | C | -6.942632000  | 1.201606000  | -4.346805000 |
| N  | -6.819669000  | -0.470169000 | -2.011949000 | H | -7.002333000  | 0.193066000  | -4.771286000 |

|                                  |              |              |              |   |               |              |              |
|----------------------------------|--------------|--------------|--------------|---|---------------|--------------|--------------|
| H                                | -6.808961000 | 1.909983000  | -5.168772000 | H | -3.165181000  | -1.711694000 | -3.849266000 |
| H                                | -7.909814000 | 1.403596000  | -3.876916000 | C | -2.620039000  | -3.776895000 | -4.027033000 |
| F                                | -8.580566000 | 1.621780000  | -0.835425000 | H | -3.614368000  | -4.124437000 | -3.763192000 |
| <sup>3</sup> IM2 <sub>2,PF</sub> |              |              |              | C | -1.599029000  | -4.683795000 | -4.307941000 |
| Ni                               | 2.756189000  | -2.375824000 | -3.683336000 | H | -1.795620000  | -5.752696000 | -4.272442000 |
| N                                | 4.497977000  | -2.119689000 | -2.826302000 | C | -0.311777000  | -4.240997000 | -4.638067000 |
| N                                | 3.665633000  | -1.546924000 | -5.179494000 | C | 0.783911000   | -5.236618000 | -4.937542000 |
| N                                | 1.262723000  | -2.394618000 | -4.951910000 | H | 1.257372000   | -5.039257000 | -5.904955000 |
| C                                | 4.839421000  | -2.436670000 | -1.477670000 | H | 0.387193000   | -6.255445000 | -4.952955000 |
| C                                | 5.037357000  | -3.787154000 | -1.118068000 | H | 1.582200000   | -5.201802000 | -4.185618000 |
| C                                | 4.959400000  | -4.885502000 | -2.151684000 | F | -6.980700000  | 4.323963000  | 1.420724000  |
| H                                | 5.605101000  | -4.679007000 | -3.011263000 | P | -7.774251000  | 3.151516000  | 0.538822000  |
| H                                | 5.259253000  | -5.844419000 | -1.720405000 | C | -7.331702000  | 3.967803000  | -1.039338000 |
| H                                | 3.941712000  | -5.001917000 | -2.544562000 | C | -6.931644000  | 1.818782000  | 1.471532000  |
| C                                | 5.313975000  | -4.095557000 | 0.219788000  | C | -9.397368000  | 3.627347000  | 1.211975000  |
| H                                | 5.471727000  | -5.134178000 | 0.499700000  | C | -8.200366000  | 3.919434000  | -2.141983000 |
| C                                | 5.392815000  | -3.094702000 | 1.187233000  | C | -7.587985000  | 0.609506000  | 1.753957000  |
| H                                | 5.607078000  | -3.349881000 | 2.221262000  | C | -9.802559000  | 3.134475000  | 2.460996000  |
| C                                | 5.193576000  | -1.764290000 | 0.819937000  | C | -6.195251000  | 4.791373000  | -1.095401000 |
| H                                | 5.250691000  | -0.980113000 | 1.570907000  | C | -5.679359000  | 2.071351000  | 2.055623000  |
| C                                | 4.916112000  | -1.413589000 | -0.506897000 | C | -10.136416000 | 4.648559000  | 0.597972000  |
| C                                | 4.699811000  | 0.031052000  | -0.885834000 | C | -7.945344000  | 4.699970000  | -3.269234000 |
| H                                | 3.775414000  | 0.159782000  | -1.459627000 | C | -7.008001000  | -0.319860000 | 2.618549000  |
| H                                | 5.517591000  | 0.397984000  | -1.515790000 | C | -10.942660000 | 3.649718000  | 3.078809000  |
| H                                | 4.644375000  | 0.664087000  | 0.003701000  | C | -5.929590000  | 5.541925000  | -2.240033000 |
| C                                | 5.451210000  | -1.527334000 | -3.612591000 | C | -5.093671000  | 1.125893000  | 2.897173000  |
| O                                | 6.616251000  | -1.250992000 | -3.305258000 | C | -11.275666000 | 5.157621000  | 1.222177000  |
| C                                | 4.936823000  | -1.205171000 | -5.005656000 | C | -6.808519000  | 5.508278000  | -3.323590000 |
| C                                | 5.628685000  | -0.610714000 | -6.059805000 | C | -5.759706000  | -0.065710000 | 3.189547000  |
| H                                | 6.666485000  | -0.322742000 | -5.941043000 | C | -11.679085000 | 4.663047000  | 2.463300000  |
| C                                | 4.934199000  | -0.403041000 | -7.259995000 | H | -9.081090000  | 3.293176000  | -2.109662000 |
| H                                | 5.445741000  | 0.057918000  | -8.098942000 | H | -8.557198000  | 0.402432000  | 1.321368000  |
| C                                | 3.589890000  | -0.778016000 | -7.394721000 | H | -9.229388000  | 2.363516000  | 2.963303000  |
| H                                | 3.040646000  | -0.620162000 | -8.315319000 | H | -5.527538000  | 4.861760000  | -0.246975000 |
| C                                | 2.968023000  | -1.367306000 | -6.295033000 | H | -5.168744000  | 3.007393000  | 1.871466000  |
| C                                | 1.531707000  | -1.850769000 | -6.179128000 | H | -9.825417000  | 5.058243000  | -0.356245000 |
| O                                | 0.758467000  | -1.727191000 | -7.135831000 | H | -8.636975000  | 4.671105000  | -4.105405000 |
| C                                | -0.062764000 | -2.852571000 | -4.686599000 | H | -7.536796000  | -1.240603000 | 2.844328000  |
| C                                | -1.090405000 | -1.924494000 | -4.408087000 | H | -11.247279000 | 3.262277000  | 4.046171000  |
| C                                | -0.824456000 | -0.439443000 | -4.455609000 | H | -5.041676000  | 6.165488000  | -2.275232000 |
| H                                | 0.065976000  | -0.174024000 | -3.874677000 | H | -4.121641000  | 1.330326000  | 3.335090000  |
| H                                | -1.673866000 | 0.123728000  | -4.060247000 | H | -11.841847000 | 5.947094000  | 0.737851000  |
| H                                | -0.640967000 | -0.106082000 | -5.483310000 | H | -6.610606000  | 6.111310000  | -4.204719000 |
| C                                | -2.362941000 | -2.407108000 | -4.078735000 | H | -5.309714000  | -0.791313000 | 3.860296000  |

|    |               |              |              |                                 |              |              |              |
|----|---------------|--------------|--------------|---------------------------------|--------------|--------------|--------------|
| H  | -12.561345000 | 5.067638000  | 2.949990000  | C                               | -4.805726000 | 2.347916000  | -3.700171000 |
| Ni | -8.692319000  | -0.003460000 | -1.456002000 | H                               | -4.859592000 | 2.992404000  | -4.573314000 |
| N  | -10.630312000 | -0.166910000 | -1.171919000 | C                               | -5.850287000 | 1.450599000  | -3.452404000 |
| N  | -8.856576000  | -1.804160000 | -1.862085000 | C                               | -6.998451000 | 1.336439000  | -4.425459000 |
| N  | -6.832272000  | -0.320441000 | -2.078140000 | H                               | -7.067899000 | 0.323933000  | -4.838865000 |
| C  | -11.588777000 | 0.873324000  | -0.987099000 | H                               | -6.873073000 | 2.035436000  | -5.256595000 |
| C  | -11.919644000 | 1.699556000  | -2.084770000 | H                               | -7.960307000 | 1.549784000  | -3.950431000 |
| C  | -11.290014000 | 1.486523000  | -3.441403000 | F                               | -8.591304000 | 1.778559000  | -0.521645000 |
| H  | -11.430916000 | 0.457473000  | -3.789160000 | <sup>1</sup> TS <sub>3,PF</sub> |              |              |              |
| H  | -11.730967000 | 2.159558000  | -4.181636000 | Ni                              | 2.787847000  | -2.424844000 | -3.769044000 |
| H  | -10.209537000 | 1.664536000  | -3.431844000 | N                               | 4.400028000  | -2.288760000 | -2.749018000 |
| C  | -12.893541000 | 2.691758000  | -1.916381000 | N                               | 3.752940000  | -1.578786000 | -5.047228000 |
| H  | -13.153099000 | 3.325402000  | -2.760835000 | N                               | 1.392740000  | -2.371728000 | -5.067994000 |
| C  | -13.546917000 | 2.856203000  | -0.696093000 | C                               | 4.489749000  | -2.696580000 | -1.390921000 |
| H  | -14.305806000 | 3.625203000  | -0.581975000 | C                               | 4.560092000  | -4.076057000 | -1.091938000 |
| C  | -13.224529000 | 2.025006000  | 0.375151000  | C                               | 4.627081000  | -5.107382000 | -2.193398000 |
| H  | -13.734656000 | 2.146538000  | 1.326950000  | H                               | 5.413569000  | -4.870650000 | -2.917015000 |
| C  | -12.247275000 | 1.030020000  | 0.252058000  | H                               | 4.825547000  | -6.100447000 | -1.781594000 |
| C  | -11.943141000 | 0.120177000  | 1.416121000  | H                               | 3.688347000  | -5.164133000 | -2.756860000 |
| H  | -10.866817000 | 0.033087000  | 1.592737000  | C                               | 4.584465000  | -4.473847000 | 0.249881000  |
| H  | -12.317206000 | -0.890546000 | 1.219918000  | H                               | 4.644646000  | -5.533226000 | 0.485835000  |
| H  | -12.410858000 | 0.489427000  | 2.332507000  | C                               | 4.539226000  | -3.533589000 | 1.278798000  |
| C  | -11.125653000 | -1.424251000 | -1.298964000 | H                               | 4.557619000  | -3.858457000 | 2.315282000  |
| O  | -12.299458000 | -1.808604000 | -1.183154000 | C                               | 4.471378000  | -2.174666000 | 0.972381000  |
| C  | -10.041364000 | -2.393565000 | -1.669798000 | H                               | 4.435585000  | -1.439852000 | 1.772697000  |
| C  | -10.183577000 | -3.763577000 | -1.863636000 | C                               | 4.442562000  | -1.734192000 | -0.355857000 |
| H  | -11.154087000 | -4.220031000 | -1.709951000 | C                               | 4.367565000  | -0.261174000 | -0.672577000 |
| C  | -9.061260000  | -4.499164000 | -2.256667000 | H                               | 3.558806000  | -0.045375000 | -1.379142000 |
| H  | -9.142282000  | -5.569780000 | -2.414131000 | H                               | 5.296668000  | 0.084825000  | -1.138694000 |
| C  | -7.836023000  | -3.854996000 | -2.453026000 | H                               | 4.199391000  | 0.325227000  | 0.234397000  |
| H  | -6.944826000  | -4.385349000 | -2.766189000 | C                               | 5.427759000  | -1.655259000 | -3.366148000 |
| C  | -7.768313000  | -2.481880000 | -2.238594000 | O                               | 6.555945000  | -1.396822000 | -2.926359000 |
| C  | -6.566482000  | -1.603998000 | -2.424858000 | C                               | 5.020745000  | -1.255795000 | -4.766292000 |
| O  | -5.511552000  | -2.081636000 | -2.875982000 | C                               | 5.787059000  | -0.605109000 | -5.727675000 |
| C  | -5.777844000  | 0.613342000  | -2.317039000 | H                               | 6.813419000  | -0.341466000 | -5.501074000 |
| C  | -4.644581000  | 0.644527000  | -1.474740000 | C                               | 5.194668000  | -0.310259000 | -6.961559000 |
| C  | -4.483583000  | -0.342939000 | -0.347665000 | H                               | 5.771902000  | 0.196503000  | -7.727986000 |
| H  | -5.404892000  | -0.460927000 | 0.226020000  | C                               | 3.862106000  | -0.658596000 | -7.212879000 |
| H  | -3.687367000  | -0.034189000 | 0.333887000  | H                               | 3.373687000  | -0.436742000 | -8.154414000 |
| H  | -4.227593000  | -1.329212000 | -0.751188000 | C                               | 3.149400000  | -1.307892000 | -6.210246000 |
| C  | -3.624381000  | 1.564479000  | -1.751198000 | C                               | 1.706010000  | -1.756954000 | -6.235402000 |
| H  | -2.754104000  | 1.596430000  | -1.100101000 | O                               | 0.985068000  | -1.546560000 | -7.219587000 |
| C  | -3.701526000  | 2.417220000  | -2.851313000 | C                               | 0.068556000  | -2.806966000 | -4.790001000 |
| H  | -2.901560000  | 3.124590000  | -3.051860000 | C                               | -0.942405000 | -1.862416000 | -4.495649000 |



|   |               |              |              |    |               |              |              |
|---|---------------|--------------|--------------|----|---------------|--------------|--------------|
| C | -0.655913000  | -0.381573000 | -4.541211000 | H  | -5.613113000  | 6.220289000  | -2.618363000 |
| H | 0.235990000   | -0.128589000 | -3.957466000 | H  | -3.744790000  | 2.063336000  | 3.189604000  |
| H | -1.499664000  | 0.191668000  | -4.148201000 | H  | -11.675023000 | 6.257687000  | 1.772437000  |
| H | -0.464955000  | -0.052180000 | -5.568688000 | H  | -7.380142000  | 5.944211000  | -4.347048000 |
| C | -2.219174000  | -2.327539000 | -4.161020000 | H  | -4.480227000  | -0.266902000 | 3.658731000  |
| H | -3.009795000  | -1.621938000 | -3.923950000 | H  | -12.509074000 | 4.847880000  | 3.645003000  |
| C | -2.495469000  | -3.693805000 | -4.111977000 | Ni | -8.615980000  | -0.071749000 | -1.751429000 |
| H | -3.492731000  | -4.025337000 | -3.839217000 | N  | -10.500117000 | -0.290543000 | -1.357671000 |
| C | -1.492347000  | -4.616782000 | -4.406178000 | N  | -8.643380000  | -1.897037000 | -1.816139000 |
| H | -1.707550000  | -5.682049000 | -4.375836000 | N  | -6.762081000  | -0.311922000 | -2.317393000 |
| C | -0.201978000  | -4.193451000 | -4.746294000 | C  | -11.453830000 | 0.752752000  | -1.183997000 |
| C | 0.870358000   | -5.205134000 | -5.076087000 | C  | -11.831614000 | 1.532788000  | -2.300826000 |
| H | 1.350809000   | -4.982743000 | -6.034319000 | C  | -11.293123000 | 1.238777000  | -3.681118000 |
| H | 0.448198000   | -6.212272000 | -5.128811000 | H  | -11.352213000 | 0.171488000  | -3.915435000 |
| H | 1.666003000   | -5.218922000 | -4.321749000 | H  | -11.856468000 | 1.789521000  | -4.439267000 |
| F | -7.073825000  | 4.604605000  | 1.406830000  | H  | -10.241359000 | 1.526207000  | -3.783098000 |
| P | -7.872264000  | 3.286873000  | 0.699542000  | C  | -12.756380000 | 2.569035000  | -2.120176000 |
| C | -7.653409000  | 4.056765000  | -0.953017000 | H  | -13.051566000 | 3.168225000  | -2.977816000 |
| C | -6.738565000  | 2.117713000  | 1.555965000  | C  | -13.313955000 | 2.823763000  | -0.868148000 |
| C | -9.398486000  | 3.730507000  | 1.599280000  | H  | -14.031922000 | 3.629591000  | -0.743897000 |
| C | -8.636011000  | 3.885683000  | -1.942641000 | C  | -12.954517000 | 2.030888000  | 0.220866000  |
| C | -7.131065000  | 0.789203000  | 1.800390000  | H  | -13.390927000 | 2.222286000  | 1.197309000  |
| C | -9.873338000  | 2.935509000  | 2.648962000  | C  | -12.025984000 | 0.992245000  | 0.086248000  |
| C | -6.569449000  | 4.913083000  | -1.206037000 | C  | -11.666656000 | 0.136732000  | 1.273900000  |
| C | -5.509516000  | 2.564438000  | 2.071273000  | H  | -10.582126000 | 0.027502000  | 1.368016000  |
| C | -10.048486000 | 4.934805000  | 1.294104000  | H  | -12.082950000 | -0.870098000 | 1.162421000  |
| C | -8.542222000  | 4.575608000  | -3.152424000 | H  | -12.051097000 | 0.572323000  | 2.199023000  |
| C | -6.327911000  | -0.057443000 | 2.565967000  | C  | -10.928797000 | -1.576462000 | -1.284338000 |
| C | -10.987395000 | 3.342345000  | 3.386349000  | O  | -12.073080000 | -2.000095000 | -1.069334000 |
| C | -6.463476000  | 5.571787000  | -2.430768000 | C  | -9.790728000  | -2.525262000 | -1.537950000 |
| C | -4.695201000  | 1.703374000  | 2.807261000  | C  | -9.839200000  | -3.915099000 | -1.543631000 |
| C | -11.172646000 | 5.327737000  | 2.021332000  | H  | -10.775966000 | -4.411910000 | -1.320737000 |
| C | -7.454078000  | 5.413972000  | -3.402163000 | C  | -8.669219000  | -4.619913000 | -1.845374000 |
| C | -5.106852000  | 0.395147000  | 3.068484000  | H  | -8.678642000  | -5.704870000 | -1.855341000 |
| C | -11.641383000 | 4.535014000  | 3.071890000  | C  | -7.489735000  | -3.930445000 | -2.145003000 |
| H | -9.480555000  | 3.232840000  | -1.761868000 | H  | -6.568322000  | -4.440729000 | -2.398636000 |
| H | -8.063798000  | 0.418843000  | 1.397842000  | C  | -7.511758000  | -2.539595000 | -2.121574000 |
| H | -9.372459000  | 2.008957000  | 2.907220000  | C  | -6.382480000  | -1.607890000 | -2.459705000 |
| H | -5.817489000  | 5.075064000  | -0.444818000 | O  | -5.291597000  | -2.058310000 | -2.841691000 |
| H | -5.197005000  | 3.587121000  | 1.910861000  | C  | -5.813511000  | 0.692431000  | -2.677319000 |
| H | -9.681637000  | 5.567207000  | 0.491966000  | C  | -4.652845000  | 0.897297000  | -1.894684000 |
| H | -9.321081000  | 4.454498000  | -3.899229000 | C  | -4.363147000  | 0.052400000  | -0.681290000 |
| H | -6.657386000  | -1.073272000 | 2.762214000  | H  | -5.255607000  | -0.096226000 | -0.069857000 |
| H | -11.341698000 | 2.724857000  | 4.206283000  | H  | -3.592651000  | 0.514321000  | -0.059185000 |

|                                 |              |              |              |   |               |              |              |
|---------------------------------|--------------|--------------|--------------|---|---------------|--------------|--------------|
| H                               | -4.013693000 | -0.940367000 | -0.985609000 | C | 2.964669000   | -1.302884000 | -6.176324000 |
| C                               | -3.736555000 | 1.879921000  | -2.292108000 | C | 1.544094000   | -1.819913000 | -6.197263000 |
| H                               | -2.846305000 | 2.041408000  | -1.689316000 | O | 0.823199000   | -1.676542000 | -7.193566000 |
| C                               | -3.944265000 | 2.639374000  | -3.442253000 | C | -0.052865000  | -2.902436000 | -4.729080000 |
| H                               | -3.221508000 | 3.395068000  | -3.736836000 | C | -1.114732000  | -2.001791000 | -4.479104000 |
| C                               | -5.083931000 | 2.419523000  | -4.214133000 | C | -0.904076000  | -0.510941000 | -4.578008000 |
| H                               | -5.245086000 | 2.998077000  | -5.119913000 | H | -0.035965000  | -0.190234000 | -3.991560000 |
| C                               | -6.028596000 | 1.453211000  | -3.849768000 | H | -1.782289000  | 0.033025000  | -4.220871000 |
| C                               | -7.237862000 | 1.223822000  | -4.723288000 | H | -0.712881000  | -0.212009000 | -5.614664000 |
| H                               | -7.433268000 | 0.158368000  | -4.874361000 | C | -2.369380000  | -2.520541000 | -4.139631000 |
| H                               | -7.103059000 | 1.694092000  | -5.701168000 | H | -3.198794000  | -1.848666000 | -3.939827000 |
| H                               | -8.138949000 | 1.657248000  | -4.275347000 | C | -2.575825000  | -3.896572000 | -4.042825000 |
| F                               | -8.681807000 | 1.931555000  | -0.064389000 | H | -3.558702000  | -4.269740000 | -3.771565000 |
| <sup>1</sup> PC <sub>2,PF</sub> |              |              |              | C | -1.522450000  | -4.775776000 | -4.291973000 |
| Ni                              | 2.637666000  | -2.358673000 | -3.702440000 | H | -1.682452000  | -5.849031000 | -4.224488000 |
| N                               | 4.227836000  | -2.107726000 | -2.674615000 | C | -0.251897000  | -4.298586000 | -4.635536000 |
| N                               | 3.570631000  | -1.507767000 | -5.001094000 | C | 0.874500000   | -5.265308000 | -4.916267000 |
| N                               | 1.249774000  | -2.409484000 | -5.012312000 | H | 1.369354000   | -5.040463000 | -5.866380000 |
| C                               | 4.320459000  | -2.452307000 | -1.299280000 | H | 0.500958000   | -6.292044000 | -4.957163000 |
| C                               | 4.438859000  | -3.813817000 | -0.939324000 | H | 1.649361000   | -5.226846000 | -4.141311000 |
| C                               | 4.550507000  | -4.889948000 | -1.993295000 | F | -7.075734000  | 4.861946000  | 2.128942000  |
| H                               | 5.317110000  | -4.646600000 | -2.735570000 | P | -7.512319000  | 3.272222000  | 1.712429000  |
| H                               | 4.803475000  | -5.851399000 | -1.538529000 | C | -7.517571000  | 3.758487000  | -0.063962000 |
| H                               | 3.610775000  | -5.021825000 | -2.542601000 | C | -5.976561000  | 2.617169000  | 2.500829000  |
| C                               | 4.467996000  | -4.151276000 | 0.418851000  | C | -9.037353000  | 3.429395000  | 2.730824000  |
| H                               | 4.565782000  | -5.196324000 | 0.701467000  | C | -8.390535000  | 3.136110000  | -0.970987000 |
| C                               | 4.380688000  | -3.169299000 | 1.405146000  | C | -5.818485000  | 1.239332000  | 2.736598000  |
| H                               | 4.403750000  | -3.447502000 | 2.455017000  | C | -9.607423000  | 2.301316000  | 3.342771000  |
| C                               | 4.264598000  | -1.828623000 | 1.038768000  | C | -6.656712000  | 4.764634000  | -0.531253000 |
| H                               | 4.195378000  | -1.061337000 | 1.805719000  | C | -4.941926000  | 3.487073000  | 2.890083000  |
| C                               | 4.229482000  | -1.447883000 | -0.307616000 | C | -9.642126000  | 4.683143000  | 2.915811000  |
| C                               | 4.101059000  | 0.006253000  | -0.688006000 | C | -8.409499000  | 3.520505000  | -2.312644000 |
| H                               | 3.291065000  | 0.160289000  | -1.409204000 | C | -4.663478000  | 0.750074000  | 3.347716000  |
| H                               | 5.020432000  | 0.367630000  | -1.161608000 | C | -10.750973000 | 2.428633000  | 4.132451000  |
| H                               | 3.901991000  | 0.623760000  | 0.191658000  | C | -6.656422000  | 5.124261000  | -1.879827000 |
| C                               | 5.230857000  | -1.447977000 | -3.305748000 | C | -3.781912000  | 2.991144000  | 3.486101000  |
| O                               | 6.340575000  | -1.119899000 | -2.865620000 | C | -10.803278000 | 4.801206000  | 3.680745000  |
| C                               | 4.819515000  | -1.116723000 | -4.722162000 | C | -7.536142000  | 4.508798000  | -2.772649000 |
| C                               | 5.562830000  | -0.462190000 | -5.698895000 | C | -3.639453000  | 1.622565000  | 3.720501000  |
| H                               | 6.573627000  | -0.142959000 | -5.473818000 | C | -11.356621000 | 3.676578000  | 4.296419000  |
| C                               | 4.967569000  | -0.235356000 | -6.945745000 | H | -9.061954000  | 2.359122000  | -0.630874000 |
| H                               | 5.526772000  | 0.273020000  | -7.724372000 | H | -6.596000000  | 0.550332000  | 2.438403000  |
| C                               | 3.654797000  | -0.653548000 | -7.194629000 | H | -9.159726000  | 1.326051000  | 3.201584000  |
| H                               | 3.164532000  | -0.485285000 | -8.146260000 | H | -5.989984000  | 5.268306000  | 0.156882000  |

|    |               |              |              |                                 |              |              |              |
|----|---------------|--------------|--------------|---------------------------------|--------------|--------------|--------------|
| H  | -5.045649000  | 4.551291000  | 2.731528000  | C                               | -6.048839000 | 0.352201000  | -3.361011000 |
| H  | -9.204671000  | 5.564003000  | 2.463401000  | C                               | -5.168912000 | 0.791109000  | -2.346262000 |
| H  | -9.110380000  | 3.045509000  | -2.992719000 | C                               | -5.246225000 | 0.214266000  | -0.954075000 |
| H  | -4.564845000  | -0.316345000 | 3.527562000  | H                               | -6.225535000 | 0.393962000  | -0.497109000 |
| H  | -11.171470000 | 1.550227000  | 4.612960000  | H                               | -4.488222000 | 0.662320000  | -0.306637000 |
| H  | -5.974230000  | 5.893721000  | -2.228857000 | H                               | -5.085759000 | -0.868853000 | -0.967660000 |
| H  | -2.991868000  | 3.679280000  | 3.771823000  | C                               | -4.223099000 | 1.774784000  | -2.659210000 |
| H  | -11.268849000 | 5.774733000  | 3.802333000  | H                               | -3.541578000 | 2.117261000  | -1.884827000 |
| H  | -7.542901000  | 4.799360000  | -3.819033000 | C                               | -4.150148000 | 2.320806000  | -3.941310000 |
| H  | -2.738446000  | 1.239078000  | 4.190395000  | H                               | -3.413565000 | 3.087059000  | -4.165837000 |
| H  | -12.253400000 | 3.771858000  | 4.901647000  | C                               | -5.027015000 | 1.881254000  | -4.933168000 |
| Ni | -8.878369000  | -0.191018000 | -2.707628000 | H                               | -4.968172000 | 2.301283000  | -5.933935000 |
| N  | -10.750409000 | -0.173523000 | -2.309545000 | C                               | -5.983799000 | 0.895804000  | -4.663012000 |
| N  | -9.042869000  | -1.982102000 | -2.467785000 | C                               | -6.912967000 | 0.413115000  | -5.751054000 |
| N  | -7.046210000  | -0.617667000 | -3.065097000 | H                               | -6.840531000 | -0.671155000 | -5.887164000 |
| C  | -11.521040000 | 1.015432000  | -2.202267000 | H                               | -6.676627000 | 0.893685000  | -6.704010000 |
| C  | -11.854667000 | 1.725154000  | -3.378603000 | H                               | -7.961151000 | 0.630181000  | -5.516012000 |
| C  | -11.481510000 | 1.192542000  | -4.742539000 | F                               | -7.982793000 | 1.690807000  | 1.264832000  |
| H  | -11.770355000 | 0.142922000  | -4.854814000 | <sup>3</sup> TS <sub>3,PF</sub> |              |              |              |
| H  | -11.972081000 | 1.771217000  | -5.529721000 | Ni                              | 2.795972000  | -2.503794000 | -3.588831000 |
| H  | -10.401072000 | 1.242731000  | -4.922541000 | N                               | 4.480148000  | -2.395852000 | -2.593518000 |
| C  | -12.563945000 | 2.926648000  | -3.261506000 | N                               | 3.816581000  | -1.526468000 | -4.909964000 |
| H  | -12.828888000 | 3.473508000  | -4.162726000 | N                               | 1.382510000  | -2.318903000 | -4.927422000 |
| C  | -12.940744000 | 3.419750000  | -2.012732000 | C                               | 4.725339000  | -2.884702000 | -1.275977000 |
| H  | -13.490479000 | 4.353769000  | -1.938835000 | C                               | 4.867737000  | -4.274645000 | -1.075057000 |
| C  | -12.613023000 | 2.707372000  | -0.859458000 | C                               | 4.833332000  | -5.235033000 | -2.240043000 |
| H  | -12.907488000 | 3.088549000  | 0.114989000  | H                               | 5.546090000  | -4.950063000 | -3.020650000 |
| C  | -11.902197000 | 1.503391000  | -0.930175000 | H                               | 5.072623000  | -6.250155000 | -1.911844000 |
| C  | -11.558335000 | 0.745080000  | 0.328339000  | H                               | 3.844274000  | -5.263492000 | -2.713868000 |
| H  | -10.483974000 | 0.542078000  | 0.397821000  | C                               | 5.048044000  | -4.753072000 | 0.228790000  |
| H  | -12.071360000 | -0.222214000 | 0.350339000  | H                               | 5.162650000  | -5.822576000 | 0.386839000  |
| H  | -11.850805000 | 1.311850000  | 1.215554000  | C                               | 5.085705000  | -3.881193000 | 1.316111000  |
| C  | -11.297797000 | -1.384441000 | -2.036253000 | H                               | 5.224935000  | -4.267683000 | 2.321832000  |
| O  | -12.466150000 | -1.654440000 | -1.728574000 | C                               | 4.942284000  | -2.510236000 | 1.105052000  |
| C  | -10.249451000 | -2.464999000 | -2.151053000 | H                               | 4.967659000  | -1.826104000 | 1.949706000  |
| C  | -10.409058000 | -3.833111000 | -1.957119000 | C                               | 4.761202000  | -1.991188000 | -0.182731000 |
| H  | -11.386894000 | -4.222829000 | -1.699722000 | C                               | 4.602916000  | -0.505161000 | -0.392256000 |
| C  | -9.288332000  | -4.659428000 | -2.100425000 | H                               | 3.718540000  | -0.278965000 | -0.998155000 |
| H  | -9.386320000  | -5.730044000 | -1.953845000 | H                               | 5.466152000  | -0.090130000 | -0.923990000 |
| C  | -8.041079000  | -4.114875000 | -2.428823000 | H                               | 4.508118000  | 0.016254000  | 0.563899000  |
| H  | -7.154565000  | -4.727349000 | -2.543395000 | C                               | 5.494211000  | -1.740014000 | -3.240788000 |
| C  | -7.948840000  | -2.739042000 | -2.610579000 | O                               | 6.641155000  | -1.532523000 | -2.828894000 |
| C  | -6.723549000  | -1.928888000 | -2.959579000 | C                               | 5.079441000  | -1.241440000 | -4.615645000 |
| O  | -5.618453000  | -2.470569000 | -3.108296000 | C                               | 5.849276000  | -0.543735000 | -5.545111000 |

|   |               |              |              |    |               |              |              |
|---|---------------|--------------|--------------|----|---------------|--------------|--------------|
| H | 6.882214000   | -0.298860000 | -5.328014000 | C  | -11.635584000 | 4.595681000  | 3.029092000  |
| C | 5.238335000   | -0.176802000 | -6.752709000 | H  | -9.578789000  | 3.253728000  | -1.833064000 |
| H | 5.812097000   | 0.366879000  | -7.496483000 | H  | -8.051768000  | 0.517565000  | 1.349773000  |
| C | 3.898523000   | -0.496423000 | -7.015442000 | H  | -9.283894000  | 2.144522000  | 2.898378000  |
| H | 3.413595000   | -0.214482000 | -7.942487000 | H  | -5.917795000  | 5.180043000  | -0.637155000 |
| C | 3.195193000   | -1.195669000 | -6.035764000 | H  | -5.199952000  | 3.720756000  | 1.705844000  |
| C | 1.743398000   | -1.646738000 | -6.065042000 | H  | -9.811377000  | 5.567361000  | 0.329147000  |
| O | 1.036704000   | -1.390540000 | -7.046418000 | H  | -9.500849000  | 4.453290000  | -3.987898000 |
| C | 0.030507000   | -2.755886000 | -4.792957000 | H  | -6.595813000  | -0.928667000 | 2.712596000  |
| C | -0.986452000  | -1.827493000 | -4.477686000 | H  | -11.230773000 | 2.852710000  | 4.233861000  |
| C | -0.679087000  | -0.354917000 | -4.353263000 | H  | -5.794089000  | 6.303435000  | -2.828126000 |
| H | 0.164696000   | -0.177656000 | -3.676756000 | H  | -3.699287000  | 2.240496000  | 2.979881000  |
| H | -1.545296000  | 0.194485000  | -3.975000000 | H  | -11.777888000 | 6.251781000  | 1.652827000  |
| H | -0.401088000  | 0.071635000  | -5.323472000 | H  | -7.601589000  | 5.974123000  | -4.504770000 |
| C | -2.288619000  | -2.298929000 | -4.271713000 | H  | -4.401967000  | -0.082527000 | 3.528090000  |
| H | -3.082064000  | -1.603435000 | -4.014190000 | H  | -12.492395000 | 4.906112000  | 3.619626000  |
| C | -2.585822000  | -3.657465000 | -4.377163000 | Ni | -8.686395000  | -0.078881000 | -1.724007000 |
| H | -3.601968000  | -3.998020000 | -4.202069000 | N  | -10.551169000 | -0.325151000 | -1.259336000 |
| C | -1.575761000  | -4.563787000 | -4.696331000 | N  | -8.687994000  | -1.905015000 | -1.779119000 |
| H | -1.803367000  | -5.623429000 | -4.784485000 | N  | -6.852131000  | -0.293864000 | -2.358173000 |
| C | -0.259643000  | -4.132535000 | -4.906268000 | C  | -11.515258000 | 0.702679000  | -1.054946000 |
| C | 0.823523000   | -5.128313000 | -5.247602000 | C  | -11.946685000 | 1.470426000  | -2.160872000 |
| H | 1.365894000   | -4.842129000 | -6.154673000 | C  | -11.450004000 | 1.180487000  | -3.557624000 |
| H | 0.398820000   | -6.123877000 | -5.402789000 | H  | -11.511085000 | 0.112970000  | -3.790905000 |
| H | 1.570558000   | -5.206624000 | -4.447820000 | H  | -12.039705000 | 1.728615000  | -4.297384000 |
| F | -7.113777000  | 4.707659000  | 1.253495000  | H  | -10.403287000 | 1.472746000  | -3.692210000 |
| P | -7.907495000  | 3.369046000  | 0.582787000  | C  | -12.885860000 | 2.488137000  | -1.952494000 |
| C | -7.746664000  | 4.121263000  | -1.084145000 | H  | -13.222348000 | 3.077583000  | -2.801631000 |
| C | -6.737481000  | 2.230034000  | 1.430036000  | C  | -13.405869000 | 2.736468000  | -0.683026000 |
| C | -9.420369000  | 3.798068000  | 1.511133000  | H  | -14.136065000 | 3.527554000  | -0.537258000 |
| C | -8.752279000  | 3.920207000  | -2.044599000 | C  | -12.992129000 | 1.956750000  | 0.396005000  |
| C | -7.111567000  | 0.904943000  | 1.717523000  | H  | -13.398114000 | 2.144046000  | 1.386220000  |
| C | -9.827248000  | 3.039396000  | 2.615127000  | C  | -12.046820000 | 0.937271000  | 0.233582000  |
| C | -6.686680000  | 4.995002000  | -1.375854000 | C  | -11.629769000 | 0.096755000  | 1.413439000  |
| C | -5.498728000  | 2.699664000  | 1.899504000  | H  | -10.541635000 | -0.006739000 | 1.462983000  |
| C | -10.124650000 | 4.962710000  | 1.174223000  | H  | -12.043477000 | -0.914006000 | 1.330685000  |
| C | -8.704690000  | 4.597877000  | -3.263889000 | H  | -11.977047000 | 0.539656000  | 2.349847000  |
| C | -6.280581000  | 0.084413000  | 2.481856000  | C  | -10.955761000 | -1.617341000 | -1.160845000 |
| C | -10.928601000 | 3.442223000  | 3.373457000  | O  | -12.083828000 | -2.057563000 | -0.898782000 |
| C | -6.626445000  | 5.641169000  | -2.610304000 | C  | -9.813407000  | -2.549589000 | -1.452921000 |
| C | -4.656850000  | 1.863652000  | 2.633352000  | C  | -9.839633000  | -3.940019000 | -1.448303000 |
| C | -11.234092000 | 5.352317000  | 1.925558000  | H  | -10.758902000 | -4.450105000 | -1.186020000 |
| C | -7.639782000  | 5.453520000  | -3.552438000 | C  | -8.671114000  | -4.628296000 | -1.791210000 |
| C | -5.050150000  | 0.559346000  | 2.938856000  | H  | -8.663535000  | -5.713310000 | -1.794340000 |

|                                 |              |              |              |   |               |              |              |
|---------------------------------|--------------|--------------|--------------|---|---------------|--------------|--------------|
| C                               | -7.515422000 | -3.922181000 | -2.140575000 | H | 4.312229000   | 0.235614000  | 0.395691000  |
| H                               | -6.596196000 | -4.418940000 | -2.426964000 | C | 5.429743000   | -1.525754000 | -3.345883000 |
| C                               | -7.558999000 | -2.531768000 | -2.124192000 | O | 6.561228000   | -1.234572000 | -2.933944000 |
| C                               | -6.458497000 | -1.584649000 | -2.510494000 | C | 4.972638000   | -1.084234000 | -4.721401000 |
| O                               | -5.376965000 | -2.020359000 | -2.933595000 | C | 5.692912000   | -0.365528000 | -5.671168000 |
| C                               | -5.932954000 | 0.721082000  | -2.762078000 | H | 6.711973000   | -0.065735000 | -5.457227000 |
| C                               | -4.749859000 | 0.952701000  | -2.021794000 | C | 5.061127000   | -0.052844000 | -6.881541000 |
| C                               | -4.406359000 | 0.125143000  | -0.810471000 | H | 5.600578000   | 0.506112000  | -7.639350000 |
| H                               | -5.274049000 | -0.025476000 | -0.164927000 | C | 3.739869000   | -0.449483000 | -7.124006000 |
| H                               | -3.618466000 | 0.602251000  | -0.222583000 | H | 3.227314000   | -0.215085000 | -8.049453000 |
| H                               | -4.057551000 | -0.867448000 | -1.116000000 | C | 3.076477000   | -1.165090000 | -6.131438000 |
| C                               | -3.863522000 | 1.945127000  | -2.460571000 | C | 1.651480000   | -1.680619000 | -6.150433000 |
| H                               | -2.956703000 | 2.128487000  | -1.889533000 | O | 0.916152000   | -1.465897000 | -7.124063000 |
| C                               | -4.121788000 | 2.687032000  | -3.612066000 | C | 0.059144000   | -2.847826000 | -4.755147000 |
| H                               | -3.421340000 | 3.450078000  | -3.939707000 | C | -0.997341000  | -1.955718000 | -4.457151000 |
| C                               | -5.282006000 | 2.439048000  | -4.343444000 | C | -0.776176000  | -0.463113000 | -4.467315000 |
| H                               | -5.481953000 | 3.003211000  | -5.250569000 | H | 0.093231000   | -0.184120000 | -3.861410000 |
| C                               | -6.198789000 | 1.462892000  | -3.936010000 | H | -1.650870000  | 0.065385000  | -4.079497000 |
| C                               | -7.432223000 | 1.203394000  | -4.766299000 | H | -0.580251000  | -0.104808000 | -5.483937000 |
| H                               | -7.626021000 | 0.133380000  | -4.882057000 | C | -2.256460000  | -2.482931000 | -4.147064000 |
| H                               | -7.328769000 | 1.647014000  | -5.760383000 | H | -3.079444000  | -1.816094000 | -3.906873000 |
| H                               | -8.322257000 | 1.645335000  | -4.304832000 | C | -2.473062000  | -3.860614000 | -4.126927000 |
| F                               | -8.710061000 | 1.985735000  | -0.146526000 | H | -3.457588000  | -4.244041000 | -3.875543000 |
| <sup>3</sup> PC <sub>2,PF</sub> |              |              |              | C | -1.425444000  | -4.731886000 | -4.423151000 |
| Ni                              | 2.800484000  | -2.403592000 | -3.707534000 | H | -1.592481000  | -5.806226000 | -4.414147000 |
| N                               | 4.454925000  | -2.230264000 | -2.717388000 | C | -0.150798000  | -4.245103000 | -4.737444000 |
| N                               | 3.717166000  | -1.446707000 | -4.994473000 | C | 0.971531000   | -5.203477000 | -5.059977000 |
| N                               | 1.367955000  | -2.350860000 | -5.005317000 | H | 1.486363000   | -4.924783000 | -5.984717000 |
| C                               | 4.641769000  | -2.692506000 | -1.385767000 | H | 0.590221000   | -6.222200000 | -5.171228000 |
| C                               | 4.791077000  | -4.078564000 | -1.155844000 | H | 1.732035000   | -5.222021000 | -4.269418000 |
| C                               | 4.833567000  | -5.056365000 | -2.306304000 | F | -7.012856000  | 4.817037000  | 1.984031000  |
| H                               | 5.553602000  | -4.746762000 | -3.070360000 | P | -7.853647000  | 3.379424000  | 1.645330000  |
| H                               | 5.110976000  | -6.054150000 | -1.955829000 | C | -7.835293000  | 3.807483000  | -0.145898000 |
| H                               | 3.861316000  | -5.141099000 | -2.806738000 | C | -6.483330000  | 2.380245000  | 2.376017000  |
| C                               | 4.915198000  | -4.534274000 | 0.162059000  | C | -9.239796000  | 3.934638000  | 2.723550000  |
| H                               | 5.036840000  | -5.599221000 | 0.343307000  | C | -8.878472000  | 3.389871000  | -0.988729000 |
| C                               | 4.891406000  | -3.644349000 | 1.235405000  | C | -6.664048000  | 1.016900000  | 2.671943000  |
| H                               | 4.987997000  | -4.013555000 | 2.252546000  | C | -10.076053000 | 2.998846000  | 3.354935000  |
| C                               | 4.743615000  | -2.278200000 | 0.997135000  | C | -6.782098000  | 4.560221000  | -0.689733000 |
| H                               | 4.723335000  | -1.581610000 | 1.831566000  | C | -5.234887000  | 2.966643000  | 2.651640000  |
| C                               | 4.614933000  | -1.781191000 | -0.305206000 | C | -9.473018000  | 5.303866000  | 2.932645000  |
| C                               | 4.453767000  | -0.300657000 | -0.546292000 | C | -8.870633000  | 3.726133000  | -2.343988000 |
| H                               | 3.595642000  | -0.092589000 | -1.194756000 | C | -5.629301000  | 0.267358000  | 3.232564000  |
| H                               | 5.336927000  | 0.110459000  | -1.047457000 | C | -11.113466000 | 3.424879000  | 4.185089000  |

|    |               |              |              |   |               |              |              |
|----|---------------|--------------|--------------|---|---------------|--------------|--------------|
| C  | -6.763356000  | 4.869478000  | -2.050647000 | C | -10.012083000 | -2.482053000 | -1.909256000 |
| C  | -4.197126000  | 2.208276000  | 3.194938000  | C | -10.088838000 | -3.858181000 | -1.700202000 |
| C  | -10.529098000 | 5.725767000  | 3.741352000  | H | -11.036062000 | -4.321446000 | -1.450986000 |
| C  | -7.808367000  | 4.458106000  | -2.880246000 | C | -8.908984000  | -4.603936000 | -1.828783000 |
| C  | -4.391000000  | 0.857888000  | 3.491028000  | H | -8.936250000  | -5.677399000 | -1.671114000 |
| C  | -11.347615000 | 4.788561000  | 4.374768000  | C | -7.695803000  | -3.987528000 | -2.165519000 |
| H  | -9.702162000  | 2.813189000  | -0.588973000 | H | -6.778197000  | -4.552383000 | -2.278553000 |
| H  | -7.611493000  | 0.541417000  | 2.460567000  | C | -7.701771000  | -2.607229000 | -2.359933000 |
| H  | -9.917511000  | 1.940252000  | 3.197003000  | C | -6.536823000  | -1.718174000 | -2.755761000 |
| H  | -5.979077000  | 4.906305000  | -0.051737000 | O | -5.414290000  | -2.214992000 | -2.917111000 |
| H  | -5.075840000  | 4.015914000  | 2.445912000  | C | -5.889343000  | 0.530509000  | -3.267342000 |
| H  | -8.829192000  | 6.037232000  | 2.464662000  | C | -4.937416000  | 0.956717000  | -2.314972000 |
| H  | -9.698847000  | 3.415942000  | -2.974130000 | C | -4.934500000  | 0.392035000  | -0.916085000 |
| H  | -5.792513000  | -0.781580000 | 3.461503000  | H | -5.930210000  | 0.437177000  | -0.462814000 |
| H  | -11.742357000 | 2.689138000  | 4.677571000  | H | -4.241001000  | 0.940704000  | -0.273583000 |
| H  | -5.933624000  | 5.438227000  | -2.459351000 | H | -4.635194000  | -0.661761000 | -0.921452000 |
| H  | -3.238318000  | 2.678450000  | 3.392269000  | C | -3.990163000  | 1.916593000  | -2.693782000 |
| H  | -10.705337000 | 6.788086000  | 3.881864000  | H | -3.258109000  | 2.250571000  | -1.962660000 |
| H  | -7.797338000  | 4.710000000  | -3.936590000 | C | -3.978171000  | 2.448860000  | -3.983166000 |
| H  | -3.584325000  | 0.271045000  | 3.920581000  | H | -3.238102000  | 3.194509000  | -4.259656000 |
| H  | -12.162444000 | 5.118448000  | 5.012623000  | C | -4.923820000  | 2.019940000  | -4.913926000 |
| Ni | -8.799808000  | -0.025108000 | -2.526931000 | H | -4.916354000  | 2.427168000  | -5.921859000 |
| N  | -10.721962000 | -0.196162000 | -2.136335000 | C | -5.886774000  | 1.061030000  | -4.575688000 |
| N  | -8.839614000  | -1.938241000 | -2.213924000 | C | -6.892455000  | 0.597667000  | -5.602286000 |
| N  | -6.900714000  | -0.407752000 | -2.902875000 | H | -6.883594000  | -0.491631000 | -5.713168000 |
| C  | -11.690144000 | 0.851415000  | -2.105956000 | H | -6.682153000  | 1.042518000  | -6.578590000 |
| C  | -12.066248000 | 1.469960000  | -3.319255000 | H | -7.915898000  | 0.875141000  | -5.322741000 |
| C  | -11.514701000 | 0.994207000  | -4.642944000 | F | -8.717956000  | 1.952103000  | 1.278428000  |
| H  | -11.587437000 | -0.092611000 | -4.746202000 |   |               |              |              |
| H  | -12.055189000 | 1.455837000  | -5.473792000 |   |               |              |              |
| H  | -10.454233000 | 1.252595000  | -4.758580000 |   |               |              |              |
| C  | -12.973812000 | 2.536605000  | -3.282092000 |   |               |              |              |
| H  | -13.269429000 | 3.009400000  | -4.215331000 |   |               |              |              |
| C  | -13.504108000 | 2.988456000  | -2.074759000 |   |               |              |              |
| H  | -14.207142000 | 3.816523000  | -2.062011000 |   |               |              |              |
| C  | -13.127871000 | 2.368661000  | -0.883962000 |   |               |              |              |
| H  | -13.538195000 | 2.716728000  | 0.060725000  |   |               |              |              |
| C  | -12.223155000 | 1.299228000  | -0.875082000 |   |               |              |              |
| C  | -11.826524000 | 0.653292000  | 0.430513000  |   |               |              |              |
| H  | -10.739727000 | 0.649149000  | 0.562097000  |   |               |              |              |
| H  | -12.167079000 | -0.386242000 | 0.472458000  |   |               |              |              |
| H  | -12.264360000 | 1.192150000  | 1.275166000  |   |               |              |              |
| C  | -11.142327000 | -1.469932000 | -1.856308000 |   |               |              |              |
| O  | -12.290821000 | -1.845241000 | -1.593662000 |   |               |              |              |
